# Supplementary material
Source: publisher figshare collection journal article supplement (https://karger.figshare.com/articles/dataset/_/4055256)
Supplement: Supplementary file 1 [file 1]

Web Appendix Table 2

**Prevalence, DALY and Death rates per 100,000 for total, ischemic and haemorrhagic stroke by GBD Regions in 2013**

| Total Stroke   |        |          |       |                |       |            |
|----------------|--------|----------|-------|----------------|-------|------------|
| Region name    | Sex    | Age      | DALY  | 95% UI         | Death | 95% UI     |
| East Asia      | Male   | 1 to 4   | 79.8  | 50.2 to 116.0  | 0.9   | 0.6 to 1.4 |
|                | Male   | 5 to 9   | 47.3  | 37.2 to 59.5   | 0.6   | 0.5 to 0.7 |
|                | Male   | 10 to 14 | 55.2  | 43.6 to 68.9   | 0.7   | 0.6 to 0.9 |
|                | Male   | 15 to 19 | 162.1 | 127.7 to 218.2 | 2.3   | 1.8 to 3.1 |
|                | Female | 1 to 4   | 44.7  | 25.8 to 61.1   | 0.5   | 0.3 to 0.7 |
|                | Female | 5 to 9   | 42    | 30.0 to 52.5   | 0.5   | 0.4 to 0.7 |
|                | Female | 10 to 14 | 42.9  | 30.4 to 54.4   | 0.6   | 0.4 to 0.7 |
|                | Female | 15 to 19 | 65.1  | 43.9 to 83.9   | 0.9   | 0.6 to 1.2 |
|                | Both   | 1 to 4   | 63.5  | 42.1 to 86.9   | 0.8   | 0.5 to 1.0 |
|                | Both   | 5 to 9   | 44.8  | 36.7 to 53.1   | 0.6   | 0.5 to 0.7 |
|                | Both   | 10 to 14 | 49.5  | 41.1 to 58.4   | 0.7   | 0.5 to 0.8 |
|                | Both   | 15 to 19 | 116.7 | 95.8 to 148.4  | 1.7   | 1.4 to 2.1 |
| Southeast Asia | Male   | 1 to 4   | 58.6  | 39.0 to 84.0   | 0.7   | 0.5 to 1.0 |
|                | Male   | 5 to 9   | 28.3  | 19.5 to 40.8   | 0.3   | 0.2 to 0.5 |
|                | Male   | 10 to 14 | 46    | 32.9 to 63.4   | 0.6   | 0.4 to 0.8 |
|                | Male   | 15 to 19 | 162.7 | 121.4 to 213.2 | 2.3   | 1.7 to 3.0 |
|                | Female | 1 to 4   | 33.4  | 20.5 to 48.2   | 0.4   | 0.2 to 0.6 |
|                | Female | 5 to 9   | 30.9  | 22.0 to 47.3   | 0.4   | 0.3 to 0.6 |
|                | Female | 10 to 14 | 38.6  | 26.7 to 63.0   | 0.5   | 0.3 to 0.8 |
|                | Female | 15 to 19 | 76.5  | 54.5 to 106.0  | 1.1   | 0.8 to 1.5 |
|                | Both   | 1 to 4   | 46.3  | 33.2 to 62.8   | 0.5   | 0.4 to 0.7 |

|                |        |          |       |                |     |            |
|----------------|--------|----------|-------|----------------|-----|------------|
|                | Both   | 5 to 9   | 29.6  | 22.4 to 39.8   | 0.4 | 0.3 to 0.5 |
|                | Both   | 10 to 14 | 42.4  | 32.5 to 58.3   | 0.6 | 0.4 to 0.8 |
|                | Both   | 15 to 19 | 120.4 | 97.4 to 148.6  | 1.7 | 1.4 to 2.1 |
| Oceania        | Male   | 1 to 4   | 145.5 | 62.5 to 310.8  | 1.7 | 0.7 to 3.7 |
|                | Male   | 5 to 9   | 105.9 | 60.4 to 175.8  | 1.3 | 0.8 to 2.2 |
|                | Male   | 10 to 14 | 56.2  | 34.5 to 86.3   | 0.7 | 0.4 to 1.1 |
|                | Male   | 15 to 19 | 230.9 | 147.6 to 367.8 | 3.3 | 2.1 to 5.3 |
|                | Female | 1 to 4   | 69.1  | 30.7 to 142.1  | 0.8 | 0.4 to 1.7 |
|                | Female | 5 to 9   | 47.2  | 25.6 to 84.5   | 0.6 | 0.3 to 1.1 |
|                | Female | 10 to 14 | 90.2  | 53.2 to 147.2  | 1.2 | 0.7 to 2.0 |
|                | Female | 15 to 19 | 48    | 29.8 to 77.4   | 0.7 | 0.4 to 1.1 |
|                | Both   | 1 to 4   | 108.6 | 51.4 to 220.2  | 1.3 | 0.6 to 2.6 |
|                | Both   | 5 to 9   | 77.6  | 47.9 to 124.5  | 1   | 0.6 to 1.6 |
|                | Both   | 10 to 14 | 72.6  | 48.9 to 106.2  | 1   | 0.6 to 1.4 |
|                | Both   | 15 to 19 | 142.3 | 94.1 to 216.3  | 2   | 1.3 to 3.1 |
| Central Asia   | Male   | 1 to 4   | 24.5  | 17.0 to 34.3   | 0.3 | 0.2 to 0.4 |
|                | Male   | 5 to 9   | 28    | 20.8 to 37.5   | 0.3 | 0.3 to 0.5 |
|                | Male   | 10 to 14 | 26.9  | 20.1 to 35.9   | 0.3 | 0.3 to 0.5 |
|                | Male   | 15 to 19 | 101.6 | 73.1 to 134.6  | 1.4 | 1.0 to 1.9 |
|                | Female | 1 to 4   | 25.7  | 14.2 to 37.1   | 0.3 | 0.2 to 0.4 |
|                | Female | 5 to 9   | 26.6  | 16.3 to 34.5   | 0.3 | 0.2 to 0.4 |
|                | Female | 10 to 14 | 27.7  | 20.2 to 39.4   | 0.4 | 0.3 to 0.5 |
|                | Female | 15 to 19 | 64.8  | 46.6 to 89.2   | 0.9 | 0.7 to 1.3 |
|                | Both   | 1 to 4   | 25.1  | 18.5 to 33.2   | 0.3 | 0.2 to 0.4 |
|                | Both   | 5 to 9   | 27.3  | 21.4 to 33.3   | 0.3 | 0.3 to 0.4 |
|                | Both   | 10 to 14 | 27.3  | 22.1 to 34.2   | 0.4 | 0.3 to 0.4 |
|                | Both   | 15 to 19 | 83.6  | 66.7 to 104.2  | 1.2 | 0.9 to 1.5 |
| Central Europe | Male   | 1 to 4   | 23    | 14.7 to 35.9   | 0.3 | 0.2 to 0.4 |

|                          |        |          |      |              |     |            |
|--------------------------|--------|----------|------|--------------|-----|------------|
|                          | Male   | 5 to 9   | 16.5 | 11.6 to 22.1 | 0.2 | 0.1 to 0.3 |
|                          | Male   | 10 to 14 | 26.8 | 20.1 to 33.8 | 0.3 | 0.2 to 0.4 |
|                          | Male   | 15 to 19 | 57.4 | 42.4 to 72.2 | 0.8 | 0.6 to 1.0 |
|                          | Female | 1 to 4   | 21.9 | 13.8 to 35.4 | 0.3 | 0.2 to 0.4 |
|                          | Female | 5 to 9   | 16.9 | 11.6 to 22.6 | 0.2 | 0.1 to 0.3 |
|                          | Female | 10 to 14 | 26.3 | 18.1 to 32.6 | 0.3 | 0.2 to 0.4 |
|                          | Female | 15 to 19 | 40.3 | 28.4 to 49.2 | 0.6 | 0.4 to 0.7 |
|                          | Both   | 1 to 4   | 22.5 | 15.3 to 33.6 | 0.3 | 0.2 to 0.4 |
|                          | Both   | 5 to 9   | 16.7 | 12.5 to 21.9 | 0.2 | 0.1 to 0.3 |
|                          | Both   | 10 to 14 | 26.6 | 20.5 to 31.6 | 0.3 | 0.3 to 0.4 |
|                          | Both   | 15 to 19 | 49   | 38.1 to 57.5 | 0.7 | 0.5 to 0.8 |
| Eastern Europe           | Male   | 1 to 4   | 5    | 2.8 to 7.4   | 0.1 | 0.0 to 0.1 |
|                          | Male   | 5 to 9   | 7    | 4.6 to 9.8   | 0.1 | 0.0 to 0.1 |
|                          | Male   | 10 to 14 | 12.8 | 9.0 to 17.3  | 0.1 | 0.1 to 0.2 |
|                          | Male   | 15 to 19 | 50.6 | 34.5 to 69.1 | 0.7 | 0.4 to 0.9 |
|                          | Female | 1 to 4   | 5.8  | 2.3 to 8.9   | 0.1 | 0.0 to 0.1 |
|                          | Female | 5 to 9   | 8.7  | 5.8 to 13.8  | 0.1 | 0.1 to 0.2 |
|                          | Female | 10 to 14 | 14.9 | 8.5 to 20.0  | 0.2 | 0.1 to 0.2 |
|                          | Female | 15 to 19 | 44.9 | 25.0 to 60.3 | 0.6 | 0.3 to 0.8 |
|                          | Both   | 1 to 4   | 5.4  | 3.2 to 7.7   | 0.1 | 0.0 to 0.1 |
|                          | Both   | 5 to 9   | 7.8  | 5.7 to 10.2  | 0.1 | 0.1 to 0.1 |
|                          | Both   | 10 to 14 | 13.9 | 10.3 to 17.1 | 0.2 | 0.1 to 0.2 |
|                          | Both   | 15 to 19 | 47.8 | 36.0 to 59.5 | 0.6 | 0.5 to 0.8 |
| High-income Asia Pacific | Male   | 1 to 4   | 13.6 | 8.3 to 19.5  | 0.2 | 0.1 to 0.2 |
|                          | Male   | 5 to 9   | 8.5  | 5.8 to 11.3  | 0.1 | 0.1 to 0.1 |
|                          | Male   | 10 to 14 | 16.3 | 11.4 to 20.8 | 0.2 | 0.1 to 0.2 |
|                          | Male   | 15 to 19 | 27.3 | 19.6 to 35.9 | 0.3 | 0.2 to 0.5 |
|                          | Female | 1 to 4   | 9.3  | 6.3 to 16.2  | 0.1 | 0.1 to 0.2 |

|                |        |          |      |              |     |            |
|----------------|--------|----------|------|--------------|-----|------------|
|                | Female | 5 to 9   | 10.9 | 7.2 to 14.8  | 0.1 | 0.1 to 0.2 |
|                | Female | 10 to 14 | 12.3 | 9.2 to 17.7  | 0.1 | 0.1 to 0.2 |
|                | Female | 15 to 19 | 20.7 | 15.4 to 32.2 | 0.3 | 0.2 to 0.4 |
|                | Both   | 1 to 4   | 11.5 | 8.0 to 16.0  | 0.1 | 0.1 to 0.2 |
|                | Both   | 5 to 9   | 9.7  | 7.1 to 12.0  | 0.1 | 0.1 to 0.1 |
|                | Both   | 10 to 14 | 14.4 | 11.4 to 17.6 | 0.2 | 0.1 to 0.2 |
|                | Both   | 15 to 19 | 24.1 | 19.2 to 30.0 | 0.3 | 0.2 to 0.4 |
| Australasia    | Male   | 1 to 4   | 4.1  | 2.3 to 6.3   | 0   | 0.0 to 0.1 |
|                | Male   | 5 to 9   | 3.5  | 2.5 to 4.7   | 0   | 0.0 to 0.0 |
|                | Male   | 10 to 14 | 7.6  | 5.5 to 10.0  | 0.1 | 0.0 to 0.1 |
|                | Male   | 15 to 19 | 17.6 | 12.0 to 23.9 | 0.2 | 0.1 to 0.3 |
|                | Female | 1 to 4   | 3.3  | 2.0 to 4.7   | 0   | 0.0 to 0.1 |
|                | Female | 5 to 9   | 4    | 2.8 to 5.6   | 0   | 0.0 to 0.1 |
|                | Female | 10 to 14 | 7.4  | 5.3 to 9.9   | 0.1 | 0.0 to 0.1 |
|                | Female | 15 to 19 | 16.1 | 10.1 to 21.3 | 0.2 | 0.1 to 0.3 |
|                | Both   | 1 to 4   | 3.7  | 2.5 to 5.1   | 0   | 0.0 to 0.1 |
|                | Both   | 5 to 9   | 3.7  | 2.9 to 4.8   | 0   | 0.0 to 0.0 |
|                | Both   | 10 to 14 | 7.5  | 5.7 to 9.4   | 0.1 | 0.0 to 0.1 |
|                | Both   | 15 to 19 | 16.8 | 12.1 to 21.1 | 0.2 | 0.1 to 0.2 |
| Western Europe | Male   | 1 to 4   | 8.2  | 5.2 to 11.3  | 0.1 | 0.1 to 0.1 |
|                | Male   | 5 to 9   | 7.1  | 5.3 to 9.1   | 0.1 | 0.0 to 0.1 |
|                | Male   | 10 to 14 | 13.8 | 10.6 to 17.0 | 0.2 | 0.1 to 0.2 |
|                | Male   | 15 to 19 | 24.9 | 19.1 to 31.2 | 0.3 | 0.2 to 0.4 |
|                | Female | 1 to 4   | 8.1  | 6.0 to 12.1  | 0.1 | 0.1 to 0.1 |
|                | Female | 5 to 9   | 7.4  | 5.7 to 11.3  | 0.1 | 0.1 to 0.1 |
|                | Female | 10 to 14 | 13.8 | 10.7 to 17.8 | 0.2 | 0.1 to 0.2 |
|                | Female | 15 to 19 | 21.7 | 16.3 to 28.2 | 0.3 | 0.2 to 0.4 |
|                | Both   | 1 to 4   | 8.1  | 6.1 to 10.7  | 0.1 | 0.1 to 0.1 |

|                           |        |          |       |                |     |            |
|---------------------------|--------|----------|-------|----------------|-----|------------|
|                           | Both   | 5 to 9   | 7.2   | 5.8 to 9.2     | 0.1 | 0.1 to 0.1 |
|                           | Both   | 10 to 14 | 13.8  | 11.3 to 16.2   | 0.2 | 0.1 to 0.2 |
|                           | Both   | 15 to 19 | 23.3  | 19.1 to 27.6   | 0.3 | 0.2 to 0.3 |
| Southern Latin America    | Male   | 1 to 4   | 33.3  | 19.2 to 54.7   | 0.4 | 0.2 to 0.6 |
|                           | Male   | 5 to 9   | 28.2  | 19.5 to 38.6   | 0.3 | 0.2 to 0.5 |
|                           | Male   | 10 to 14 | 41.7  | 30.4 to 57.1   | 0.5 | 0.4 to 0.7 |
|                           | Male   | 15 to 19 | 100.6 | 72.8 to 138.3  | 1.4 | 1.0 to 2.0 |
|                           | Female | 1 to 4   | 21.2  | 12.4 to 37.0   | 0.2 | 0.1 to 0.4 |
|                           | Female | 5 to 9   | 21.8  | 14.7 to 34.0   | 0.3 | 0.2 to 0.4 |
|                           | Female | 10 to 14 | 34.9  | 25.9 to 51.5   | 0.5 | 0.3 to 0.7 |
|                           | Female | 15 to 19 | 61.9  | 43.8 to 88.5   | 0.9 | 0.6 to 1.3 |
|                           | Both   | 1 to 4   | 27.3  | 17.0 to 42.2   | 0.3 | 0.2 to 0.5 |
|                           | Both   | 5 to 9   | 25.1  | 17.9 to 33.7   | 0.3 | 0.2 to 0.4 |
|                           | Both   | 10 to 14 | 38.3  | 30.5 to 49.4   | 0.5 | 0.4 to 0.6 |
|                           | Both   | 15 to 19 | 81.6  | 63.7 to 104.5  | 1.1 | 0.9 to 1.5 |
| High-income North America | Male   | 1 to 4   | 23.2  | 12.6 to 37.2   | 0.3 | 0.1 to 0.4 |
|                           | Male   | 5 to 9   | 15.2  | 10.7 to 20.5   | 0.1 | 0.1 to 0.2 |
|                           | Male   | 10 to 14 | 24.4  | 17.3 to 32.0   | 0.2 | 0.1 to 0.3 |
|                           | Male   | 15 to 19 | 42    | 29.8 to 57.9   | 0.4 | 0.2 to 0.6 |
|                           | Female | 1 to 4   | 21.4  | 11.4 to 32.0   | 0.2 | 0.1 to 0.4 |
|                           | Female | 5 to 9   | 13.5  | 8.7 to 18.2    | 0.1 | 0.1 to 0.2 |
|                           | Female | 10 to 14 | 20.4  | 14.7 to 26.7   | 0.2 | 0.1 to 0.2 |
|                           | Female | 15 to 19 | 34.5  | 23.0 to 45.9   | 0.3 | 0.1 to 0.4 |
|                           | Both   | 1 to 4   | 22.3  | 13.5 to 32.6   | 0.3 | 0.1 to 0.4 |
|                           | Both   | 5 to 9   | 14.4  | 10.7 to 18.3   | 0.1 | 0.1 to 0.2 |
|                           | Both   | 10 to 14 | 22.5  | 17.2 to 28.0   | 0.2 | 0.1 to 0.2 |
|                           | Both   | 15 to 19 | 38.3  | 29.1 to 48.7   | 0.3 | 0.2 to 0.4 |
| Caribbean                 | Male   | 1 to 4   | 301.8 | 150.8 to 534.4 | 3.6 | 1.8 to 6.3 |

|                       |        |          |       |                |     |            |
|-----------------------|--------|----------|-------|----------------|-----|------------|
|                       | Male   | 5 to 9   | 110.2 | 68.3 to 168.0  | 1.4 | 0.9 to 2.1 |
|                       | Male   | 10 to 14 | 104.3 | 71.7 to 144.6  | 1.4 | 0.9 to 1.9 |
|                       | Male   | 15 to 19 | 117   | 81.6 to 163.5  | 1.7 | 1.1 to 2.3 |
|                       | Female | 1 to 4   | 284.3 | 155.5 to 481.9 | 3.4 | 1.8 to 5.7 |
|                       | Female | 5 to 9   | 101.5 | 61.6 to 157.8  | 1.3 | 0.8 to 2.0 |
|                       | Female | 10 to 14 | 89.4  | 57.0 to 129.8  | 1.2 | 0.8 to 1.7 |
|                       | Female | 15 to 19 | 109.7 | 73.4 to 159.0  | 1.6 | 1.0 to 2.3 |
|                       | Both   | 1 to 4   | 293.2 | 181.2 to 450.3 | 3.5 | 2.1 to 5.3 |
|                       | Both   | 5 to 9   | 105.9 | 74.1 to 147.1  | 1.3 | 0.9 to 1.8 |
|                       | Both   | 10 to 14 | 97    | 73.8 to 128.7  | 1.3 | 1.0 to 1.7 |
|                       | Both   | 15 to 19 | 113.4 | 86.7 to 148.4  | 1.6 | 1.2 to 2.1 |
| Andean Latin America  | Male   | 1 to 4   | 86.8  | 50.8 to 147.7  | 1   | 0.6 to 1.7 |
|                       | Male   | 5 to 9   | 60.4  | 42.2 to 84.6   | 0.8 | 0.5 to 1.1 |
|                       | Male   | 10 to 14 | 98.7  | 73.2 to 131.7  | 1.3 | 1.0 to 1.8 |
|                       | Male   | 15 to 19 | 171.7 | 119.6 to 248.2 | 2.5 | 1.7 to 3.6 |
|                       | Female | 1 to 4   | 63.9  | 36.3 to 125.4  | 0.8 | 0.4 to 1.5 |
|                       | Female | 5 to 9   | 44.4  | 27.1 to 63.2   | 0.6 | 0.3 to 0.8 |
|                       | Female | 10 to 14 | 77.4  | 52.5 to 104.4  | 1   | 0.7 to 1.4 |
|                       | Female | 15 to 19 | 122.5 | 77.3 to 164.5  | 1.8 | 1.1 to 2.4 |
|                       | Both   | 1 to 4   | 75.6  | 50.4 to 119.1  | 0.9 | 0.6 to 1.4 |
|                       | Both   | 5 to 9   | 52.6  | 40.2 to 68.1   | 0.7 | 0.5 to 0.9 |
|                       | Both   | 10 to 14 | 88.2  | 71.1 to 108.7  | 1.2 | 0.9 to 1.5 |
|                       | Both   | 15 to 19 | 147.5 | 115.1 to 191.0 | 2.1 | 1.6 to 2.7 |
| Central Latin America | Male   | 1 to 4   | 56.3  | 39.5 to 75.9   | 0.7 | 0.5 to 0.9 |
|                       | Male   | 5 to 9   | 31.7  | 24.5 to 39.9   | 0.4 | 0.3 to 0.5 |
|                       | Male   | 10 to 14 | 54.9  | 43.8 to 67.9   | 0.7 | 0.6 to 0.9 |
|                       | Male   | 15 to 19 | 100.7 | 78.0 to 132.7  | 1.4 | 1.1 to 1.9 |
|                       | Female | 1 to 4   | 47.4  | 27.6 to 66.1   | 0.6 | 0.3 to 0.8 |

|                              |        |          |       |                |     |            |
|------------------------------|--------|----------|-------|----------------|-----|------------|
|                              | Female | 5 to 9   | 26.4  | 17.9 to 34.0   | 0.3 | 0.2 to 0.4 |
|                              | Female | 10 to 14 | 45.8  | 33.8 to 58.7   | 0.6 | 0.4 to 0.8 |
|                              | Female | 15 to 19 | 78.9  | 57.9 to 108.6  | 1.1 | 0.8 to 1.5 |
|                              | Both   | 1 to 4   | 51.9  | 39.2 to 65.2   | 0.6 | 0.5 to 0.8 |
|                              | Both   | 5 to 9   | 29.1  | 24.0 to 35.1   | 0.4 | 0.3 to 0.4 |
|                              | Both   | 10 to 14 | 50.5  | 42.7 to 60.2   | 0.7 | 0.6 to 0.8 |
|                              | Both   | 15 to 19 | 90    | 75.9 to 109.8  | 1.3 | 1.1 to 1.6 |
| Tropical Latin America       | Male   | 1 to 4   | 32.9  | 15.3 to 59.2   | 0.4 | 0.2 to 0.7 |
|                              | Male   | 5 to 9   | 31.9  | 22.9 to 43.4   | 0.4 | 0.3 to 0.5 |
|                              | Male   | 10 to 14 | 51.5  | 35.7 to 69.3   | 0.7 | 0.5 to 0.9 |
|                              | Male   | 15 to 19 | 99.1  | 64.9 to 146.2  | 1.4 | 0.9 to 2.1 |
|                              | Female | 1 to 4   | 22.8  | 11.8 to 37.9   | 0.3 | 0.1 to 0.4 |
|                              | Female | 5 to 9   | 26.6  | 19.3 to 38.9   | 0.3 | 0.2 to 0.5 |
|                              | Female | 10 to 14 | 46.6  | 33.7 to 69.9   | 0.6 | 0.4 to 0.9 |
|                              | Female | 15 to 19 | 69.9  | 48.3 to 110.5  | 1   | 0.7 to 1.6 |
|                              | Both   | 1 to 4   | 27.9  | 16.5 to 44.9   | 0.3 | 0.2 to 0.5 |
|                              | Both   | 5 to 9   | 29.3  | 23.0 to 37.3   | 0.4 | 0.3 to 0.5 |
|                              | Both   | 10 to 14 | 49.1  | 38.2 to 63.6   | 0.6 | 0.5 to 0.8 |
|                              | Both   | 15 to 19 | 84.8  | 63.4 to 112.7  | 1.2 | 0.9 to 1.6 |
| North Africa and Middle East | Male   | 1 to 4   | 250.8 | 176.0 to 344.1 | 3   | 2.1 to 4.1 |
|                              | Male   | 5 to 9   | 169.9 | 137.9 to 207.2 | 2.1 | 1.7 to 2.6 |
|                              | Male   | 10 to 14 | 187.2 | 155.2 to 224.0 | 2.5 | 2.1 to 3.0 |
|                              | Male   | 15 to 19 | 311.7 | 248.9 to 383.2 | 4.5 | 3.6 to 5.5 |
|                              | Female | 1 to 4   | 223.5 | 161.5 to 310.9 | 2.6 | 1.9 to 3.7 |
|                              | Female | 5 to 9   | 124.7 | 97.7 to 171.1  | 1.6 | 1.2 to 2.2 |
|                              | Female | 10 to 14 | 123.4 | 97.3 to 164.9  | 1.7 | 1.3 to 2.2 |
|                              | Female | 15 to 19 | 155.7 | 117.9 to 202.9 | 2.2 | 1.7 to 2.9 |
|                              | Both   | 1 to 4   | 237.5 | 184.7 to 304.8 | 2.8 | 2.2 to 3.6 |

|                            |        |          |       |                |     |            |
|----------------------------|--------|----------|-------|----------------|-----|------------|
|                            | Both   | 5 to 9   | 147.8 | 123.2 to 175.5 | 1.9 | 1.5 to 2.2 |
|                            | Both   | 10 to 14 | 156.1 | 133.5 to 184.2 | 2.1 | 1.8 to 2.5 |
|                            | Both   | 15 to 19 | 235.7 | 199.1 to 276.4 | 3.4 | 2.9 to 4.0 |
| South Asia                 | Male   | 1 to 4   | 75.4  | 40.2 to 132.5  | 0.9 | 0.5 to 1.6 |
|                            | Male   | 5 to 9   | 54.6  | 32.3 to 89.4   | 0.7 | 0.4 to 1.1 |
|                            | Male   | 10 to 14 | 107.8 | 71.8 to 159.6  | 1.4 | 0.9 to 2.1 |
|                            | Male   | 15 to 19 | 172.7 | 114.0 to 254.2 | 2.4 | 1.6 to 3.6 |
|                            | Female | 1 to 4   | 56.7  | 25.9 to 131.4  | 0.7 | 0.3 to 1.6 |
|                            | Female | 5 to 9   | 81.6  | 45.5 to 155.3  | 1   | 0.6 to 1.9 |
|                            | Female | 10 to 14 | 85.6  | 50.7 to 147.1  | 1.1 | 0.7 to 2.0 |
|                            | Female | 15 to 19 | 129   | 78.8 to 203.1  | 1.8 | 1.1 to 2.9 |
|                            | Both   | 1 to 4   | 66.4  | 39.2 to 112.7  | 0.8 | 0.5 to 1.3 |
|                            | Both   | 5 to 9   | 67.4  | 44.4 to 107.1  | 0.8 | 0.5 to 1.3 |
|                            | Both   | 10 to 14 | 97.2  | 68.7 to 136.4  | 1.3 | 0.9 to 1.8 |
|                            | Both   | 15 to 19 | 151.8 | 110.9 to 205.8 | 2.2 | 1.6 to 2.9 |
| Central Sub-Saharan Africa | Male   | 1 to 4   | 396.9 | 191.5 to 766.9 | 4.7 | 2.3 to 9.1 |
|                            | Male   | 5 to 9   | 96.6  | 48.2 to 173.9  | 1.2 | 0.6 to 2.2 |
|                            | Male   | 10 to 14 | 93.3  | 52.9 to 148.8  | 1.2 | 0.7 to 2.0 |
|                            | Male   | 15 to 19 | 165.5 | 100.1 to 238.2 | 2.4 | 1.4 to 3.4 |
|                            | Female | 1 to 4   | 316.5 | 92.9 to 758.8  | 3.7 | 1.1 to 9.0 |
|                            | Female | 5 to 9   | 121.9 | 60.3 to 221.5  | 1.5 | 0.8 to 2.8 |
|                            | Female | 10 to 14 | 104.1 | 58.8 to 169.8  | 1.4 | 0.8 to 2.3 |
|                            | Female | 15 to 19 | 154.9 | 95.1 to 245.0  | 2.2 | 1.4 to 3.5 |
|                            | Both   | 1 to 4   | 357.1 | 178.2 to 653.9 | 4.2 | 2.1 to 7.7 |
|                            | Both   | 5 to 9   | 109.2 | 65.1 to 178.3  | 1.4 | 0.8 to 2.2 |
|                            | Both   | 10 to 14 | 98.7  | 65.4 to 141.3  | 1.3 | 0.9 to 1.9 |
|                            | Both   | 15 to 19 | 160.2 | 112.3 to 217.8 | 2.3 | 1.6 to 3.1 |
| Eastern Sub-Saharan Africa | Male   | 1 to 4   | 20.9  | 12.7 to 33.8   | 0.2 | 0.1 to 0.4 |



|                             |        |          |       |                |     |            |
|-----------------------------|--------|----------|-------|----------------|-----|------------|
|                             | Male   | 5 to 9   | 18    | 11.1 to 26.1   | 0.2 | 0.1 to 0.3 |
|                             | Male   | 10 to 14 | 24.7  | 16.5 to 34.6   | 0.3 | 0.2 to 0.4 |
|                             | Male   | 15 to 19 | 96.6  | 68.8 to 128.6  | 1.4 | 1.0 to 1.8 |
|                             | Female | 1 to 4   | 15.7  | 8.4 to 32.6    | 0.2 | 0.1 to 0.4 |
|                             | Female | 5 to 9   | 11.7  | 7.3 to 20.1    | 0.1 | 0.1 to 0.2 |
|                             | Female | 10 to 14 | 13.7  | 8.8 to 22.1    | 0.2 | 0.1 to 0.3 |
|                             | Female | 15 to 19 | 44.6  | 26.2 to 65.3   | 0.6 | 0.4 to 0.9 |
|                             | Both   | 1 to 4   | 18.3  | 12.0 to 27.7   | 0.2 | 0.1 to 0.3 |
|                             | Both   | 5 to 9   | 14.9  | 10.4 to 20.0   | 0.2 | 0.1 to 0.2 |
|                             | Both   | 10 to 14 | 19.3  | 13.7 to 25.6   | 0.2 | 0.2 to 0.3 |
|                             | Both   | 15 to 19 | 70.7  | 51.8 to 90.0   | 1   | 0.7 to 1.3 |
| Southern Sub-Saharan Africa | Male   | 1 to 4   | 165.5 | 72.8 to 321.0  | 2   | 0.9 to 3.8 |
|                             | Male   | 5 to 9   | 46.9  | 25.6 to 78.9   | 0.6 | 0.3 to 1.0 |
|                             | Male   | 10 to 14 | 43.5  | 28.0 to 65.9   | 0.6 | 0.4 to 0.9 |
|                             | Male   | 15 to 19 | 121.3 | 80.7 to 169.6  | 1.7 | 1.1 to 2.4 |
|                             | Female | 1 to 4   | 301.1 | 63.1 to 646.9  | 3.6 | 0.7 to 7.7 |
|                             | Female | 5 to 9   | 59.7  | 23.2 to 118.0  | 0.7 | 0.3 to 1.5 |
|                             | Female | 10 to 14 | 38.8  | 19.7 to 63.7   | 0.5 | 0.3 to 0.8 |
|                             | Female | 15 to 19 | 79.3  | 46.0 to 116.8  | 1.1 | 0.6 to 1.7 |
|                             | Both   | 1 to 4   | 232.6 | 82.9 to 423.2  | 2.8 | 1.0 to 5.0 |
|                             | Both   | 5 to 9   | 53.3  | 27.4 to 87.8   | 0.7 | 0.3 to 1.1 |
|                             | Both   | 10 to 14 | 41.1  | 26.4 to 58.3   | 0.5 | 0.3 to 0.8 |
|                             | Both   | 15 to 19 | 100.4 | 71.1 to 132.7  | 1.4 | 1.0 to 1.9 |
| Western Sub-Saharan Africa  | Male   | 1 to 4   | 201.9 | 106.1 to 373.7 | 2.4 | 1.3 to 4.4 |
|                             | Male   | 5 to 9   | 77.7  | 46.9 to 127.0  | 1   | 0.6 to 1.6 |
|                             | Male   | 10 to 14 | 70.2  | 44.8 to 104.9  | 0.9 | 0.6 to 1.4 |
|                             | Male   | 15 to 19 | 92.2  | 65.1 to 123.3  | 1.3 | 0.9 to 1.8 |
|                             | Female | 1 to 4   | 182.2 | 79.5 to 522.7  | 2.2 | 0.9 to 6.2 |

|  |        |          |       |                |     |            |
|--|--------|----------|-------|----------------|-----|------------|
|  | Female | 5 to 9   | 51.5  | 31.2 to 98.7   | 0.6 | 0.4 to 1.2 |
|  | Female | 10 to 14 | 50.1  | 32.3 to 94.7   | 0.7 | 0.4 to 1.3 |
|  | Female | 15 to 19 | 81.4  | 54.8 to 120.8  | 1.2 | 0.8 to 1.7 |
|  | Both   | 1 to 4   | 192.2 | 113.0 to 367.9 | 2.3 | 1.3 to 4.4 |
|  | Both   | 5 to 9   | 64.8  | 43.0 to 97.8   | 0.8 | 0.5 to 1.2 |
|  | Both   | 10 to 14 | 60.3  | 43.2 to 84.3   | 0.8 | 0.6 to 1.1 |
|  | Both   | 15 to 19 | 86.9  | 66.5 to 111.6  | 1.2 | 0.9 to 1.6 |

| Ischemic Stroke |        |          |     |            |      |              |     |            |
|-----------------|--------|----------|-----|------------|------|--------------|-----|------------|
| East Asia       | Male   | 1 to 4   | 0.3 | 0.3 to 0.4 | 8.2  | 4.2 to 14.1  | 0.1 | 0.0 to 0.2 |
|                 | Male   | 5 to 9   | 0.9 | 0.8 to 1.1 | 5.5  | 3.2 to 8.3   | 0.1 | 0.0 to 0.1 |
|                 | Male   | 10 to 14 | 2   | 1.8 to 2.2 | 6.8  | 4.4 to 10.0  | 0.1 | 0.1 to 0.1 |
|                 | Male   | 15 to 19 | 3.3 | 2.9 to 3.8 | 16.2 | 10.7 to 24.3 | 0.2 | 0.1 to 0.3 |
|                 | Female | 1 to 4   | 0.2 | 0.2 to 0.2 | 7.5  | 3.4 to 12.4  | 0.1 | 0.0 to 0.1 |
|                 | Female | 5 to 9   | 0.7 | 0.6 to 0.8 | 6.8  | 3.8 to 9.4   | 0.1 | 0.0 to 0.1 |
|                 | Female | 10 to 14 | 1.5 | 1.3 to 1.7 | 4.9  | 2.7 to 6.7   | 0.1 | 0.0 to 0.1 |
|                 | Female | 15 to 19 | 2.6 | 2.3 to 3.0 | 7    | 3.7 to 10.5  | 0.1 | 0.0 to 0.1 |
|                 | Both   | 1 to 4   | 0.3 | 0.2 to 0.3 | 7.9  | 4.4 to 12.7  | 0.1 | 0.1 to 0.1 |
|                 | Both   | 5 to 9   | 0.8 | 0.7 to 0.9 | 6.1  | 4.2 to 8.3   | 0.1 | 0.1 to 0.1 |
|                 | Both   | 10 to 14 | 1.8 | 1.6 to 1.9 | 5.9  | 4.3 to 8.0   | 0.1 | 0.1 to 0.1 |
|                 | Both   | 15 to 19 | 3   | 2.7 to 3.3 | 11.9 | 8.3 to 16.2  | 0.2 | 0.1 to 0.2 |
| Southeast Asia  | Male   | 1 to 4   | 0.4 | 0.3 to 0.5 | 8.5  | 4.7 to 13.4  | 0.1 | 0.1 to 0.2 |
|                 | Male   | 5 to 9   | 1.1 | 0.8 to 1.5 | 3.9  | 2.2 to 5.8   | 0   | 0.0 to 0.1 |
|                 | Male   | 10 to 14 | 2.3 | 1.8 to 2.9 | 3.4  | 2.3 to 5.1   | 0   | 0.0 to 0.1 |
|                 | Male   | 15 to 19 | 4   | 3.2 to 5.0 | 21.9 | 12.8 to 33.2 | 0.3 | 0.2 to 0.5 |
|                 | Female | 1 to 4   | 0.2 | 0.2 to 0.3 | 5.2  | 2.5 to 8.1   | 0.1 | 0.0 to 0.1 |
|                 | Female | 5 to 9   | 0.8 | 0.6 to 1.0 | 4.1  | 2.4 to 6.0   | 0   | 0.0 to 0.1 |
|                 | Female | 10 to 14 | 1.7 | 1.3 to 2.1 | 3.9  | 2.5 to 7.0   | 0   | 0.0 to 0.1 |
|                 | Female | 15 to 19 | 3   | 2.3 to 3.8 | 12.5 | 7.7 to 18.7  | 0.2 | 0.1 to 0.3 |
|                 | Both   | 1 to 4   | 0.3 | 0.2 to 0.4 | 6.9  | 4.1 to 10.0  | 0.1 | 0.0 to 0.1 |
|                 | Both   | 5 to 9   | 0.9 | 0.7 to 1.2 | 4    | 2.7 to 5.3   | 0   | 0.0 to 0.1 |
|                 | Both   | 10 to 14 | 2   | 1.7 to 2.4 | 3.6  | 2.7 to 5.4   | 0   | 0.0 to 0.1 |
|                 | Both   | 15 to 19 | 3.5 | 3.0 to 4.1 | 17.3 | 11.8 to 23.4 | 0.2 | 0.2 to 0.3 |
| Oceania         | Male   | 1 to 4   | 0.3 | 0.2 to 0.5 | 22.7 | 8.6 to 54.6  | 0.3 | 0.1 to 0.6 |

|                |        |          |      |             |      |              |     |            |
|----------------|--------|----------|------|-------------|------|--------------|-----|------------|
|                | Male   | 5 to 9   | 1    | 0.6 to 1.5  | 24.7 | 11.7 to 44.1 | 0.3 | 0.1 to 0.6 |
|                | Male   | 10 to 14 | 2.1  | 1.4 to 2.9  | 7.9  | 4.1 to 12.8  | 0.1 | 0.1 to 0.2 |
|                | Male   | 15 to 19 | 3.5  | 2.4 to 4.9  | 27.3 | 14.9 to 48.0 | 0.4 | 0.2 to 0.7 |
|                | Female | 1 to 4   | 0.2  | 0.1 to 0.3  | 8.6  | 2.7 to 26.7  | 0.1 | 0.0 to 0.3 |
|                | Female | 5 to 9   | 0.7  | 0.4 to 1.0  | 3.3  | 1.3 to 8.1   | 0   | 0.0 to 0.1 |
|                | Female | 10 to 14 | 1.4  | 1.0 to 2.1  | 10.3 | 4.7 to 20.9  | 0.1 | 0.1 to 0.3 |
|                | Female | 15 to 19 | 2.5  | 1.7 to 3.6  | 5    | 2.7 to 10.0  | 0.1 | 0.0 to 0.1 |
|                | Both   | 1 to 4   | 0.3  | 0.2 to 0.4  | 15.9 | 6.6 to 36.8  | 0.2 | 0.1 to 0.4 |
|                | Both   | 5 to 9   | 0.8  | 0.6 to 1.2  | 14.4 | 7.4 to 25.0  | 0.2 | 0.1 to 0.3 |
|                | Both   | 10 to 14 | 1.8  | 1.3 to 2.4  | 9.1  | 5.3 to 15.2  | 0.1 | 0.1 to 0.2 |
|                | Both   | 15 to 19 | 3    | 2.3 to 3.9  | 16.5 | 9.8 to 27.6  | 0.2 | 0.1 to 0.4 |
| Central Asia   | Male   | 1 to 4   | 0.3  | 0.3 to 0.4  | 4.5  | 2.7 to 7.6   | 0.1 | 0.0 to 0.1 |
|                | Male   | 5 to 9   | 1    | 0.7 to 1.2  | 7.1  | 4.8 to 10.2  | 0.1 | 0.1 to 0.1 |
|                | Male   | 10 to 14 | 1.8  | 1.4 to 2.2  | 6.7  | 4.6 to 9.6   | 0.1 | 0.1 to 0.1 |
|                | Male   | 15 to 19 | 2.7  | 2.1 to 3.5  | 25.1 | 15.5 to 38.2 | 0.4 | 0.2 to 0.5 |
|                | Female | 1 to 4   | 0.3  | 0.2 to 0.3  | 7.6  | 4.1 to 12.2  | 0.1 | 0.0 to 0.1 |
|                | Female | 5 to 9   | 0.8  | 0.6 to 1.0  | 7.1  | 4.3 to 9.8   | 0.1 | 0.1 to 0.1 |
|                | Female | 10 to 14 | 1.6  | 1.3 to 1.9  | 4.7  | 3.2 to 8.2   | 0.1 | 0.0 to 0.1 |
|                | Female | 15 to 19 | 2.5  | 2.0 to 3.1  | 18.4 | 12.8 to 31.2 | 0.3 | 0.2 to 0.4 |
|                | Both   | 1 to 4   | 0.3  | 0.2 to 0.4  | 6    | 4.2 to 9.2   | 0.1 | 0.0 to 0.1 |
|                | Both   | 5 to 9   | 0.9  | 0.7 to 1.1  | 7.1  | 5.2 to 9.0   | 0.1 | 0.1 to 0.1 |
|                | Both   | 10 to 14 | 1.7  | 1.4 to 2.0  | 5.8  | 4.4 to 7.9   | 0.1 | 0.1 to 0.1 |
|                | Both   | 15 to 19 | 2.6  | 2.2 to 3.1  | 21.8 | 16.1 to 29.9 | 0.3 | 0.2 to 0.4 |
| Central Europe | Male   | 1 to 4   | 1.3  | 1.1 to 1.5  | 3.9  | 2.2 to 6.1   | 0   | 0.0 to 0.1 |
|                | Male   | 5 to 9   | 3.8  | 3.3 to 4.5  | 3.1  | 2.0 to 4.3   | 0   | 0.0 to 0.0 |
|                | Male   | 10 to 14 | 7.3  | 6.3 to 8.5  | 4    | 2.8 to 5.4   | 0   | 0.0 to 0.1 |
|                | Male   | 15 to 19 | 11.2 | 9.5 to 13.1 | 10.2 | 6.6 to 13.7  | 0.1 | 0.1 to 0.2 |

|                          |        |          |      |              |      |             |     |            |
|--------------------------|--------|----------|------|--------------|------|-------------|-----|------------|
|                          | Female | 1 to 4   | 0.8  | 0.6 to 0.9   | 4.6  | 2.2 to 7.3  | 0.1 | 0.0 to 0.1 |
|                          | Female | 5 to 9   | 2.3  | 2.0 to 2.7   | 3.2  | 1.8 to 4.4  | 0   | 0.0 to 0.1 |
|                          | Female | 10 to 14 | 4.5  | 3.9 to 5.2   | 4.6  | 3.0 to 6.1  | 0.1 | 0.0 to 0.1 |
|                          | Female | 15 to 19 | 6.9  | 5.7 to 8.2   | 8.3  | 5.0 to 10.6 | 0.1 | 0.1 to 0.1 |
|                          | Both   | 1 to 4   | 1    | 0.9 to 1.2   | 4.2  | 2.4 to 6.2  | 0   | 0.0 to 0.1 |
|                          | Both   | 5 to 9   | 3.1  | 2.8 to 3.5   | 3.1  | 2.1 to 4.2  | 0   | 0.0 to 0.0 |
|                          | Both   | 10 to 14 | 6    | 5.3 to 6.7   | 4.3  | 3.3 to 5.4  | 0   | 0.0 to 0.1 |
|                          | Both   | 15 to 19 | 9.1  | 8.0 to 10.3  | 9.3  | 6.5 to 11.6 | 0.1 | 0.1 to 0.1 |
| Eastern Europe           | Male   | 1 to 4   | 3    | 2.3 to 3.8   | 1.3  | 0.8 to 2.0  | 0   | 0.0 to 0.0 |
|                          | Male   | 5 to 9   | 8.2  | 6.4 to 10.0  | 1.8  | 1.3 to 2.5  | 0   | 0.0 to 0.0 |
|                          | Male   | 10 to 14 | 15   | 12.0 to 18.3 | 3    | 2.0 to 4.1  | 0   | 0.0 to 0.0 |
|                          | Male   | 15 to 19 | 22.4 | 17.8 to 27.9 | 10.3 | 6.6 to 15.6 | 0.1 | 0.1 to 0.2 |
|                          | Female | 1 to 4   | 1.8  | 1.3 to 2.2   | 1.1  | 0.6 to 1.7  | 0   | 0.0 to 0.0 |
|                          | Female | 5 to 9   | 5    | 3.9 to 6.1   | 1.5  | 1.0 to 2.0  | 0   | 0.0 to 0.0 |
|                          | Female | 10 to 14 | 9.6  | 7.5 to 11.7  | 2.5  | 1.7 to 3.4  | 0   | 0.0 to 0.0 |
|                          | Female | 15 to 19 | 14.8 | 11.6 to 18.6 | 8.7  | 5.3 to 12.3 | 0.1 | 0.0 to 0.1 |
|                          | Both   | 1 to 4   | 2.4  | 2.0 to 2.8   | 1.2  | 0.8 to 1.7  | 0   | 0.0 to 0.0 |
|                          | Both   | 5 to 9   | 6.6  | 5.5 to 7.7   | 1.7  | 1.2 to 2.2  | 0   | 0.0 to 0.0 |
|                          | Both   | 10 to 14 | 12.4 | 10.5 to 14.3 | 2.7  | 2.0 to 3.6  | 0   | 0.0 to 0.0 |
|                          | Both   | 15 to 19 | 18.7 | 15.7 to 22.1 | 9.5  | 7.0 to 13.0 | 0.1 | 0.1 to 0.1 |
| High-income Asia Pacific | Male   | 1 to 4   | 1.1  | 0.7 to 1.7   | 3.1  | 1.4 to 5.2  | 0   | 0.0 to 0.1 |
|                          | Male   | 5 to 9   | 3.4  | 2.3 to 4.9   | 1.2  | 0.7 to 1.6  | 0   | 0.0 to 0.0 |
|                          | Male   | 10 to 14 | 6.9  | 5.1 to 9.1   | 2.2  | 1.5 to 3.1  | 0   | 0.0 to 0.0 |

|                |        |          |      |             |     |            |   |            |
|----------------|--------|----------|------|-------------|-----|------------|---|------------|
|                | Male   | 15 to 19 | 11.2 | 8.3 to 15.1 | 4.8 | 3.1 to 6.6 | 0 | 0.0 to 0.1 |
|                | Female | 1 to 4   | 0.7  | 0.4 to 1.0  | 1.4 | 0.8 to 2.6 | 0 | 0.0 to 0.0 |
|                | Female | 5 to 9   | 2.2  | 1.5 to 3.1  | 1.6 | 0.8 to 2.2 | 0 | 0.0 to 0.0 |
|                | Female | 10 to 14 | 4.7  | 3.4 to 6.3  | 1.9 | 1.3 to 2.8 | 0 | 0.0 to 0.0 |
|                | Female | 15 to 19 | 8    | 6.0 to 10.6 | 3.5 | 2.4 to 5.9 | 0 | 0.0 to 0.1 |
|                | Both   | 1 to 4   | 0.9  | 0.6 to 1.2  | 2.3 | 1.3 to 3.4 | 0 | 0.0 to 0.0 |
|                | Both   | 5 to 9   | 2.8  | 2.1 to 3.7  | 1.4 | 0.9 to 1.8 | 0 | 0.0 to 0.0 |
|                | Both   | 10 to 14 | 5.8  | 4.6 to 7.4  | 2.1 | 1.5 to 2.8 | 0 | 0.0 to 0.0 |
|                | Both   | 15 to 19 | 9.7  | 7.8 to 12.0 | 4.2 | 3.0 to 5.6 | 0 | 0.0 to 0.1 |
| Australasia    | Male   | 1 to 4   | 1.2  | 0.8 to 1.8  | 1.5 | 0.8 to 2.4 | 0 | 0.0 to 0.0 |
|                | Male   | 5 to 9   | 3.9  | 2.6 to 5.4  | 1   | 0.7 to 1.4 | 0 | 0.0 to 0.0 |
|                | Male   | 10 to 14 | 8    | 5.6 to 10.9 | 1.8 | 1.2 to 2.7 | 0 | 0.0 to 0.0 |
|                | Male   | 15 to 19 | 13   | 8.7 to 18.1 | 3.4 | 2.2 to 4.8 | 0 | 0.0 to 0.0 |
|                | Female | 1 to 4   | 0.9  | 0.6 to 1.3  | 0.7 | 0.4 to 1.1 | 0 | 0.0 to 0.0 |
|                | Female | 5 to 9   | 2.9  | 2.0 to 4.1  | 1   | 0.6 to 1.4 | 0 | 0.0 to 0.0 |
|                | Female | 10 to 14 | 6.2  | 4.5 to 8.2  | 1.7 | 1.1 to 2.3 | 0 | 0.0 to 0.0 |
|                | Female | 15 to 19 | 10.4 | 7.5 to 13.8 | 3.2 | 2.2 to 4.4 | 0 | 0.0 to 0.0 |
|                | Both   | 1 to 4   | 1.1  | 0.8 to 1.4  | 1.1 | 0.7 to 1.6 | 0 | 0.0 to 0.0 |
|                | Both   | 5 to 9   | 3.4  | 2.6 to 4.4  | 1   | 0.7 to 1.3 | 0 | 0.0 to 0.0 |
|                | Both   | 10 to 14 | 7.1  | 5.6 to 8.8  | 1.8 | 1.3 to 2.3 | 0 | 0.0 to 0.0 |
|                | Both   | 15 to 19 | 11.7 | 9.0 to 14.9 | 3.3 | 2.4 to 4.4 | 0 | 0.0 to 0.0 |
| Western Europe | Male   | 1 to 4   | 1.6  | 1.4 to 1.9  | 1.3 | 0.8 to 1.8 | 0 | 0.0 to 0.0 |
|                | Male   | 5 to 9   | 4.7  | 4.1 to 5.3  | 1.4 | 1.0 to 1.9 | 0 | 0.0 to 0.0 |

|                           |        |          |      |              |      |              |     |            |
|---------------------------|--------|----------|------|--------------|------|--------------|-----|------------|
|                           | Male   | 10 to 14 | 9.2  | 8.1 to 10.3  | 2.5  | 1.9 to 3.2   | 0   | 0.0 to 0.0 |
|                           | Male   | 15 to 19 | 14.7 | 13.1 to 16.5 | 4.5  | 3.3 to 5.8   | 0   | 0.0 to 0.0 |
|                           | Female | 1 to 4   | 1.3  | 1.2 to 1.5   | 1.5  | 1.1 to 2.7   | 0   | 0.0 to 0.0 |
|                           | Female | 5 to 9   | 4.2  | 3.7 to 4.7   | 1.5  | 1.1 to 2.1   | 0   | 0.0 to 0.0 |
|                           | Female | 10 to 14 | 8.7  | 7.8 to 9.6   | 2.5  | 1.9 to 3.4   | 0   | 0.0 to 0.0 |
|                           | Female | 15 to 19 | 14.3 | 12.9 to 15.9 | 4.6  | 3.4 to 5.9   | 0   | 0.0 to 0.0 |
|                           | Both   | 1 to 4   | 1.5  | 1.3 to 1.6   | 1.4  | 1.0 to 2.0   | 0   | 0.0 to 0.0 |
|                           | Both   | 5 to 9   | 4.4  | 4.0 to 4.8   | 1.4  | 1.1 to 1.9   | 0   | 0.0 to 0.0 |
|                           | Both   | 10 to 14 | 8.9  | 8.3 to 9.6   | 2.5  | 1.9 to 3.2   | 0   | 0.0 to 0.0 |
|                           | Both   | 15 to 19 | 14.5 | 13.4 to 15.7 | 4.5  | 3.5 to 5.7   | 0   | 0.0 to 0.0 |
| Southern Latin America    | Male   | 1 to 4   | 0.7  | 0.5 to 1.1   | 7.4  | 3.8 to 14.3  | 0.1 | 0.0 to 0.2 |
|                           | Male   | 5 to 9   | 2.2  | 1.5 to 3.0   | 5.8  | 3.5 to 10.0  | 0.1 | 0.0 to 0.1 |
|                           | Male   | 10 to 14 | 4.4  | 3.3 to 5.8   | 7.4  | 4.6 to 12.2  | 0.1 | 0.1 to 0.2 |
|                           | Male   | 15 to 19 | 7.2  | 5.2 to 9.5   | 21.5 | 13.4 to 36.0 | 0.3 | 0.2 to 0.5 |
|                           | Female | 1 to 4   | 0.6  | 0.4 to 0.9   | 5.9  | 3.2 to 12.0  | 0.1 | 0.0 to 0.1 |
|                           | Female | 5 to 9   | 1.8  | 1.2 to 2.6   | 5.1  | 3.0 to 10.2  | 0.1 | 0.0 to 0.1 |
|                           | Female | 10 to 14 | 3.7  | 2.6 to 4.9   | 6.5  | 4.1 to 12.6  | 0.1 | 0.0 to 0.2 |
|                           | Female | 15 to 19 | 5.9  | 4.5 to 7.8   | 12.1 | 8.1 to 20.9  | 0.2 | 0.1 to 0.3 |
|                           | Both   | 1 to 4   | 0.7  | 0.5 to 0.9   | 6.7  | 3.8 to 12.1  | 0.1 | 0.0 to 0.1 |
|                           | Both   | 5 to 9   | 2    | 1.6 to 2.6   | 5.5  | 3.6 to 9.2   | 0.1 | 0.0 to 0.1 |
|                           | Both   | 10 to 14 | 4    | 3.3 to 5.0   | 6.9  | 4.8 to 11.3  | 0.1 | 0.1 to 0.1 |
|                           | Both   | 15 to 19 | 6.6  | 5.3 to 8.0   | 16.9 | 11.8 to 26.4 | 0.2 | 0.2 to 0.4 |
| High-income North America | Male   | 1 to 4   | 4.5  | 3.2 to 5.9   | 5.1  | 2.5 to 9.1   | 0.1 | 0.0 to 0.1 |
|                           | Male   | 5 to 9   | 16.8 | 12.6 to 20.9 | 4.1  | 2.7 to 5.7   | 0   | 0.0 to 0.0 |

|                      |        |          |      |              |      |              |     |            |
|----------------------|--------|----------|------|--------------|------|--------------|-----|------------|
|                      | Male   | 10 to 14 | 38.5 | 30.1 to 47.6 | 7.5  | 4.4 to 11.2  | 0   | 0.0 to 0.0 |
|                      | Male   | 15 to 19 | 67.9 | 52.3 to 84.1 | 13.3 | 7.3 to 21.6  | 0   | 0.0 to 0.1 |
|                      | Female | 1 to 4   | 3.2  | 1.9 to 4.3   | 4.7  | 2.6 to 7.9   | 0   | 0.0 to 0.1 |
|                      | Female | 5 to 9   | 12.8 | 8.4 to 16.6  | 3.5  | 2.3 to 4.9   | 0   | 0.0 to 0.0 |
|                      | Female | 10 to 14 | 31.4 | 22.8 to 39.2 | 6.3  | 3.6 to 9.8   | 0   | 0.0 to 0.0 |
|                      | Female | 15 to 19 | 58.1 | 42.9 to 73.0 | 11.9 | 6.6 to 19.1  | 0   | 0.0 to 0.1 |
|                      | Both   | 1 to 4   | 3.8  | 3.0 to 4.7   | 4.9  | 3.0 to 7.9   | 0.1 | 0.0 to 0.1 |
|                      | Both   | 5 to 9   | 14.8 | 11.9 to 17.7 | 3.8  | 2.7 to 5.1   | 0   | 0.0 to 0.0 |
|                      | Both   | 10 to 14 | 35   | 29.9 to 41.0 | 6.9  | 4.5 to 10.0  | 0   | 0.0 to 0.0 |
|                      | Both   | 15 to 19 | 63.1 | 53.7 to 75.1 | 12.6 | 8.0 to 19.0  | 0   | 0.0 to 0.1 |
| Caribbean            | Male   | 1 to 4   | 0.5  | 0.4 to 0.7   | 49.3 | 23.2 to 96.5 | 0.6 | 0.3 to 1.1 |
|                      | Male   | 5 to 9   | 1.7  | 1.3 to 2.2   | 20.8 | 11.7 to 36.1 | 0.3 | 0.1 to 0.5 |
|                      | Male   | 10 to 14 | 3.8  | 2.9 to 4.6   | 23.7 | 14.2 to 36.7 | 0.3 | 0.2 to 0.5 |
|                      | Male   | 15 to 19 | 6.6  | 5.0 to 8.1   | 35.9 | 22.1 to 55.4 | 0.5 | 0.3 to 0.8 |
|                      | Female | 1 to 4   | 0.3  | 0.2 to 0.4   | 46.5 | 22.0 to 88.8 | 0.5 | 0.3 to 1.1 |
|                      | Female | 5 to 9   | 0.9  | 0.6 to 1.3   | 18.8 | 9.1 to 32.4  | 0.2 | 0.1 to 0.4 |
|                      | Female | 10 to 14 | 2.3  | 1.8 to 2.9   | 20.1 | 11.1 to 36.8 | 0.3 | 0.1 to 0.5 |
|                      | Female | 15 to 19 | 4.4  | 3.5 to 5.4   | 30.3 | 17.9 to 51.7 | 0.4 | 0.2 to 0.7 |
|                      | Both   | 1 to 4   | 0.4  | 0.3 to 0.5   | 47.9 | 26.4 to 80.7 | 0.6 | 0.3 to 1.0 |
|                      | Both   | 5 to 9   | 1.3  | 1.0 to 1.6   | 19.8 | 12.8 to 31.4 | 0.2 | 0.2 to 0.4 |
|                      | Both   | 10 to 14 | 3.1  | 2.6 to 3.6   | 21.9 | 15.0 to 33.0 | 0.3 | 0.2 to 0.4 |
|                      | Both   | 15 to 19 | 5.5  | 4.7 to 6.5   | 33.1 | 23.3 to 48.4 | 0.5 | 0.3 to 0.7 |
| Andean Latin America | Male   | 1 to 4   | 0.4  | 0.3 to 0.6   | 12.7 | 6.3 to 24.4  | 0.1 | 0.1 to 0.3 |



|                        |        |          |     |             |      |              |     |            |
|------------------------|--------|----------|-----|-------------|------|--------------|-----|------------|
|                        | Male   | 5 to 9   | 1.4 | 0.9 to 1.9  | 13.2 | 7.6 to 22.9  | 0.2 | 0.1 to 0.3 |
|                        | Male   | 10 to 14 | 2.9 | 2.1 to 3.7  | 17.9 | 10.4 to 30.6 | 0.2 | 0.1 to 0.4 |
|                        | Male   | 15 to 19 | 4.6 | 3.3 to 6.0  | 42.1 | 24.5 to 73.4 | 0.6 | 0.3 to 1.0 |
|                        | Female | 1 to 4   | 0.2 | 0.1 to 0.4  | 8.9  | 4.4 to 19.8  | 0.1 | 0.1 to 0.2 |
|                        | Female | 5 to 9   | 0.8 | 0.4 to 1.1  | 10.5 | 6.2 to 20.1  | 0.1 | 0.1 to 0.3 |
|                        | Female | 10 to 14 | 1.7 | 1.2 to 2.2  | 16.7 | 10.6 to 28.6 | 0.2 | 0.1 to 0.4 |
|                        | Female | 15 to 19 | 2.7 | 2.0 to 3.6  | 29.9 | 18.7 to 50.7 | 0.4 | 0.3 to 0.7 |
|                        | Both   | 1 to 4   | 0.3 | 0.3 to 0.5  | 10.8 | 6.3 to 21.2  | 0.1 | 0.1 to 0.3 |
|                        | Both   | 5 to 9   | 1.1 | 0.8 to 1.4  | 11.9 | 7.9 to 19.8  | 0.1 | 0.1 to 0.2 |
|                        | Both   | 10 to 14 | 2.3 | 1.9 to 2.8  | 17.3 | 12.2 to 26.3 | 0.2 | 0.2 to 0.3 |
|                        | Both   | 15 to 19 | 3.6 | 3.0 to 4.5  | 36.1 | 24.8 to 58.3 | 0.5 | 0.4 to 0.8 |
| Central Latin America  | Male   | 1 to 4   | 0.1 | 0.0 to 0.1  | 9.7  | 5.1 to 17.2  | 0.1 | 0.1 to 0.2 |
|                        | Male   | 5 to 9   | 0.2 | 0.2 to 0.3  | 5.5  | 3.3 to 8.9   | 0.1 | 0.0 to 0.1 |
|                        | Male   | 10 to 14 | 0.5 | 0.4 to 0.6  | 7.5  | 4.9 to 12.2  | 0.1 | 0.1 to 0.2 |
|                        | Male   | 15 to 19 | 1   | 0.8 to 1.2  | 17.4 | 11.7 to 28.1 | 0.2 | 0.2 to 0.4 |
|                        | Female | 1 to 4   | 0.1 | 0.0 to 0.1  | 7.7  | 3.5 to 15.8  | 0.1 | 0.0 to 0.2 |
|                        | Female | 5 to 9   | 0.2 | 0.2 to 0.2  | 4.6  | 2.6 to 7.8   | 0.1 | 0.0 to 0.1 |
|                        | Female | 10 to 14 | 0.4 | 0.4 to 0.5  | 6.8  | 4.5 to 11.4  | 0.1 | 0.1 to 0.2 |
|                        | Female | 15 to 19 | 0.8 | 0.7 to 0.9  | 13.8 | 9.5 to 21.8  | 0.2 | 0.1 to 0.3 |
|                        | Both   | 1 to 4   | 0.1 | 0.1 to 0.1  | 8.7  | 5.3 to 15.1  | 0.1 | 0.1 to 0.2 |
|                        | Both   | 5 to 9   | 0.2 | 0.2 to 0.2  | 5    | 3.5 to 7.7   | 0.1 | 0.0 to 0.1 |
|                        | Both   | 10 to 14 | 0.5 | 0.4 to 0.5  | 7.2  | 5.4 to 10.9  | 0.1 | 0.1 to 0.1 |
|                        | Both   | 15 to 19 | 0.9 | 0.8 to 1.0  | 15.6 | 11.9 to 23.5 | 0.2 | 0.2 to 0.3 |
| Tropical Latin America | Male   | 1 to 4   | 0.8 | 0.5 to 1.2  | 4.3  | 1.5 to 9.0   | 0   | 0.0 to 0.1 |
|                        | Male   | 5 to 9   | 2.5 | 1.5 to 3.7  | 3.3  | 1.9 to 5.1   | 0   | 0.0 to 0.1 |
|                        | Male   | 10 to 14 | 5.3 | 3.4 to 7.3  | 4.2  | 2.7 to 6.4   | 0   | 0.0 to 0.1 |
|                        | Male   | 15 to 19 | 8.8 | 5.5 to 12.3 | 14.2 | 8.2 to 22.7  | 0.2 | 0.1 to 0.3 |

|                              |        |          |      |             |      |              |     |            |
|------------------------------|--------|----------|------|-------------|------|--------------|-----|------------|
|                              | Female | 1 to 4   | 0.5  | 0.3 to 0.8  | 2.6  | 1.1 to 5.0   | 0   | 0.0 to 0.1 |
|                              | Female | 5 to 9   | 1.6  | 0.8 to 2.4  | 2.7  | 1.5 to 3.9   | 0   | 0.0 to 0.0 |
|                              | Female | 10 to 14 | 3.6  | 2.3 to 5.1  | 4.1  | 2.6 to 6.2   | 0   | 0.0 to 0.1 |
|                              | Female | 15 to 19 | 6.2  | 3.8 to 8.9  | 9.9  | 6.0 to 15.9  | 0.1 | 0.1 to 0.2 |
|                              | Both   | 1 to 4   | 0.6  | 0.4 to 0.9  | 3.5  | 1.5 to 6.7   | 0   | 0.0 to 0.1 |
|                              | Both   | 5 to 9   | 2.1  | 1.4 to 2.7  | 3    | 2.0 to 4.1   | 0   | 0.0 to 0.0 |
|                              | Both   | 10 to 14 | 4.4  | 3.3 to 5.6  | 4.2  | 3.0 to 5.6   | 0   | 0.0 to 0.1 |
|                              | Both   | 15 to 19 | 7.5  | 5.5 to 9.9  | 12.1 | 8.3 to 16.8  | 0.2 | 0.1 to 0.2 |
| North Africa and Middle East | Male   | 1 to 4   | 0.5  | 0.4 to 0.6  | 23   | 13.9 to 37.4 | 0.3 | 0.2 to 0.4 |
|                              | Male   | 5 to 9   | 1.6  | 1.4 to 1.8  | 11.2 | 7.8 to 16.3  | 0.1 | 0.1 to 0.2 |
|                              | Male   | 10 to 14 | 3.1  | 2.7 to 3.4  | 15.8 | 9.7 to 22.0  | 0.2 | 0.1 to 0.3 |
|                              | Male   | 15 to 19 | 4.7  | 4.1 to 5.3  | 32.5 | 23.3 to 47.6 | 0.5 | 0.3 to 0.7 |
|                              | Female | 1 to 4   | 0.3  | 0.3 to 0.4  | 28.3 | 16.3 to 45.8 | 0.3 | 0.2 to 0.5 |
|                              | Female | 5 to 9   | 1    | 0.9 to 1.1  | 10.9 | 7.2 to 16.1  | 0.1 | 0.1 to 0.2 |
|                              | Female | 10 to 14 | 2    | 1.8 to 2.2  | 15.6 | 9.5 to 23.1  | 0.2 | 0.1 to 0.3 |
|                              | Female | 15 to 19 | 3.2  | 2.8 to 3.7  | 20.4 | 13.5 to 29.5 | 0.3 | 0.2 to 0.4 |
|                              | Both   | 1 to 4   | 0.4  | 0.4 to 0.5  | 25.6 | 17.4 to 36.3 | 0.3 | 0.2 to 0.4 |
|                              | Both   | 5 to 9   | 1.3  | 1.2 to 1.4  | 11.1 | 8.4 to 14.9  | 0.1 | 0.1 to 0.2 |
|                              | Both   | 10 to 14 | 2.5  | 2.3 to 2.8  | 15.7 | 10.9 to 20.3 | 0.2 | 0.1 to 0.3 |
|                              | Both   | 15 to 19 | 3.9  | 3.6 to 4.3  | 26.6 | 20.8 to 35.1 | 0.4 | 0.3 to 0.5 |
| South Asia                   | Male   | 1 to 4   | 0.8  | 0.6 to 1.1  | 14.1 | 6.0 to 28.5  | 0.2 | 0.1 to 0.3 |
|                              | Male   | 5 to 9   | 2.7  | 1.8 to 3.8  | 8.4  | 4.0 to 16.1  | 0.1 | 0.0 to 0.2 |
|                              | Male   | 10 to 14 | 6    | 4.3 to 8.3  | 13.4 | 7.1 to 23.3  | 0.2 | 0.1 to 0.3 |
|                              | Male   | 15 to 19 | 10.3 | 7.3 to 14.1 | 26.6 | 12.8 to 46.9 | 0.4 | 0.2 to 0.7 |
|                              | Female | 1 to 4   | 0.6  | 0.4 to 0.8  | 9.8  | 3.8 to 21.5  | 0.1 | 0.0 to 0.3 |
|                              | Female | 5 to 9   | 2    | 1.4 to 2.6  | 12   | 5.1 to 25.6  | 0.1 | 0.1 to 0.3 |
|                              | Female | 10 to 14 | 4.3  | 3.1 to 5.5  | 10.5 | 4.7 to 23.1  | 0.1 | 0.1 to 0.3 |

|                            |        |          |     |             |      |               |     |            |
|----------------------------|--------|----------|-----|-------------|------|---------------|-----|------------|
|                            | Female | 15 to 19 | 7.2 | 5.3 to 9.3  | 20.3 | 9.6 to 39.9   | 0.3 | 0.1 to 0.6 |
|                            | Both   | 1 to 4   | 0.7 | 0.5 to 0.9  | 12.1 | 6.4 to 21.3   | 0.1 | 0.1 to 0.3 |
|                            | Both   | 5 to 9   | 2.4 | 1.8 to 3.0  | 10.1 | 5.5 to 16.9   | 0.1 | 0.1 to 0.2 |
|                            | Both   | 10 to 14 | 5.2 | 4.2 to 6.4  | 12   | 7.3 to 18.8   | 0.2 | 0.1 to 0.2 |
|                            | Both   | 15 to 19 | 8.8 | 7.0 to 11.0 | 23.6 | 14.3 to 36.1  | 0.3 | 0.2 to 0.5 |
| Central Sub-Saharan Africa | Male   | 1 to 4   | 0.7 | 0.5 to 1.0  | 88.8 | 10.5 to 274.4 | 1.1 | 0.1 to 3.2 |
|                            | Male   | 5 to 9   | 2.1 | 1.5 to 2.8  | 15   | 5.4 to 34.4   | 0.2 | 0.1 to 0.4 |
|                            | Male   | 10 to 14 | 4.2 | 3.1 to 5.4  | 11.5 | 5.3 to 22.5   | 0.1 | 0.1 to 0.3 |
|                            | Male   | 15 to 19 | 6.5 | 4.8 to 8.6  | 24.9 | 9.9 to 45.8   | 0.3 | 0.1 to 0.6 |
|                            | Female | 1 to 4   | 0.5 | 0.3 to 0.7  | 58.4 | 4.6 to 153.7  | 0.7 | 0.1 to 1.8 |
|                            | Female | 5 to 9   | 1.6 | 1.1 to 2.0  | 17.9 | 4.5 to 39.9   | 0.2 | 0.1 to 0.5 |
|                            | Female | 10 to 14 | 3.1 | 2.2 to 4.0  | 11.8 | 4.8 to 24.7   | 0.2 | 0.1 to 0.3 |
|                            | Female | 15 to 19 | 4.8 | 3.5 to 6.3  | 22.4 | 10.6 to 44.1  | 0.3 | 0.1 to 0.6 |
|                            | Both   | 1 to 4   | 0.6 | 0.5 to 0.8  | 73.7 | 8.9 to 173.6  | 0.9 | 0.1 to 2.1 |
|                            | Both   | 5 to 9   | 1.8 | 1.5 to 2.2  | 16.4 | 5.6 to 31.7   | 0.2 | 0.1 to 0.4 |
|                            | Both   | 10 to 14 | 3.6 | 2.9 to 4.4  | 11.6 | 6.0 to 19.6   | 0.1 | 0.1 to 0.3 |
|                            | Both   | 15 to 19 | 5.7 | 4.5 to 7.1  | 23.7 | 13.8 to 37.3  | 0.3 | 0.2 to 0.5 |
| Eastern Sub-Saharan Africa | Male   | 1 to 4   | 0.8 | 0.7 to 1.0  | 3.8  | 1.1 to 8.0    | 0   | 0.0 to 0.1 |
|                            | Male   | 5 to 9   | 2.3 | 2.0 to 2.6  | 2.6  | 1.2 to 4.3    | 0   | 0.0 to 0.0 |
|                            | Male   | 10 to 14 | 4   | 3.5 to 4.6  | 3.1  | 1.6 to 5.0    | 0   | 0.0 to 0.1 |
|                            | Male   | 15 to 19 | 5.6 | 4.7 to 6.6  | 13.7 | 5.1 to 25.0   | 0.2 | 0.1 to 0.3 |
|                            | Female | 1 to 4   | 0.5 | 0.5 to 0.6  | 2.4  | 1.1 to 5.0    | 0   | 0.0 to 0.1 |
|                            | Female | 5 to 9   | 1.5 | 1.3 to 1.7  | 1.7  | 0.8 to 2.9    | 0   | 0.0 to 0.0 |
|                            | Female | 10 to 14 | 2.7 | 2.3 to 3.1  | 1.8  | 0.9 to 3.0    | 0   | 0.0 to 0.0 |
|                            | Female | 15 to 19 | 3.8 | 3.2 to 4.4  | 6.4  | 2.9 to 10.7   | 0.1 | 0.0 to 0.1 |
|                            | Both   | 1 to 4   | 0.7 | 0.6 to 0.8  | 3.1  | 1.4 to 5.3    | 0   | 0.0 to 0.1 |
|                            | Both   | 5 to 9   | 1.9 | 1.7 to 2.1  | 2.2  | 1.1 to 3.2    | 0   | 0.0 to 0.0 |

|                             |        |          |     |            |      |               |     |            |
|-----------------------------|--------|----------|-----|------------|------|---------------|-----|------------|
|                             | Both   | 10 to 14 | 3.4 | 3.0 to 3.7 | 2.4  | 1.4 to 3.6    | 0   | 0.0 to 0.0 |
|                             | Both   | 15 to 19 | 4.7 | 4.1 to 5.3 | 10   | 4.6 to 16.1   | 0.1 | 0.1 to 0.2 |
| Southern Sub-Saharan Africa | Male   | 1 to 4   | 0.5 | 0.4 to 0.7 | 3.5  | 1.1 to 9.4    | 0   | 0.0 to 0.1 |
|                             | Male   | 5 to 9   | 1.7 | 1.2 to 2.3 | 1.9  | 0.8 to 4.1    | 0   | 0.0 to 0.0 |
|                             | Male   | 10 to 14 | 3.6 | 2.7 to 4.7 | 3.1  | 1.7 to 5.9    | 0   | 0.0 to 0.1 |
|                             | Male   | 15 to 19 | 5.9 | 4.3 to 7.6 | 17.1 | 10.3 to 26.7  | 0.2 | 0.1 to 0.4 |
|                             | Female | 1 to 4   | 0.5 | 0.4 to 0.7 | 7.5  | 2.3 to 23.8   | 0.1 | 0.0 to 0.3 |
|                             | Female | 5 to 9   | 1.6 | 1.2 to 2.1 | 2.6  | 1.1 to 8.0    | 0   | 0.0 to 0.1 |
|                             | Female | 10 to 14 | 3.4 | 2.6 to 4.3 | 2.6  | 1.3 to 6.5    | 0   | 0.0 to 0.1 |
|                             | Female | 15 to 19 | 5.7 | 4.1 to 7.4 | 9.2  | 5.1 to 17.6   | 0.1 | 0.1 to 0.2 |
|                             | Both   | 1 to 4   | 0.5 | 0.4 to 0.6 | 5.5  | 2.1 to 15.2   | 0.1 | 0.0 to 0.2 |
|                             | Both   | 5 to 9   | 1.7 | 1.4 to 2.0 | 2.2  | 1.2 to 5.8    | 0   | 0.0 to 0.1 |
|                             | Both   | 10 to 14 | 3.5 | 2.8 to 4.2 | 2.9  | 1.8 to 5.3    | 0   | 0.0 to 0.1 |
|                             | Both   | 15 to 19 | 5.8 | 4.6 to 7.1 | 13.2 | 8.8 to 19.8   | 0.2 | 0.1 to 0.3 |
| Western Sub-Saharan Africa  | Male   | 1 to 4   | 0.7 | 0.5 to 0.8 | 35.8 | 11.8 to 96.9  | 0.4 | 0.1 to 1.1 |
|                             | Male   | 5 to 9   | 2   | 1.7 to 2.5 | 9    | 4.5 to 19.0   | 0.1 | 0.1 to 0.2 |
|                             | Male   | 10 to 14 | 4.1 | 3.4 to 4.9 | 12.1 | 6.5 to 20.1   | 0.2 | 0.1 to 0.3 |
|                             | Male   | 15 to 19 | 6.4 | 5.2 to 7.9 | 25.8 | 12.7 to 39.1  | 0.4 | 0.2 to 0.6 |
|                             | Female | 1 to 4   | 0.5 | 0.4 to 0.6 | 41.7 | 12.5 to 126.6 | 0.5 | 0.1 to 1.5 |
|                             | Female | 5 to 9   | 1.6 | 1.3 to 2.0 | 8.7  | 4.2 to 21.5   | 0.1 | 0.0 to 0.3 |
|                             | Female | 10 to 14 | 3.2 | 2.7 to 3.9 | 4.6  | 2.1 to 13.9   | 0.1 | 0.0 to 0.2 |
|                             | Female | 15 to 19 | 5   | 4.0 to 6.1 | 13.3 | 7.9 to 25.8   | 0.2 | 0.1 to 0.4 |
|                             | Both   | 1 to 4   | 0.6 | 0.5 to 0.7 | 38.7 | 14.2 to 89.8  | 0.5 | 0.2 to 1.1 |
|                             | Both   | 5 to 9   | 1.8 | 1.6 to 2.1 | 8.9  | 5.0 to 18.4   | 0.1 | 0.1 to 0.2 |
|                             | Both   | 10 to 14 | 3.7 | 3.2 to 4.2 | 8.4  | 5.3 to 13.9   | 0.1 | 0.1 to 0.2 |
|                             | Both   | 15 to 19 | 5.7 | 4.9 to 6.6 | 19.7 | 12.2 to 27.8  | 0.3 | 0.2 to 0.4 |



| Haemorrhagic Stroke |        |          |      |              |       |                |     |            |
|---------------------|--------|----------|------|--------------|-------|----------------|-----|------------|
| East Asia           | Male   | 1 to 4   | 1.2  | 1.1 to 1.3   | 71.6  | 45.8 to 102.7  | 0.8 | 0.5 to 1.2 |
|                     | Male   | 5 to 9   | 3.5  | 3.2 to 3.8   | 41.8  | 32.8 to 52.6   | 0.5 | 0.4 to 0.7 |
|                     | Male   | 10 to 14 | 6.8  | 6.3 to 7.3   | 48.4  | 38.3 to 60.5   | 0.6 | 0.5 to 0.8 |
|                     | Male   | 15 to 19 | 10.6 | 9.8 to 11.6  | 145.9 | 114.8 to 196.6 | 2.1 | 1.6 to 2.8 |
|                     | Female | 1 to 4   | 0.7  | 0.6 to 0.8   | 37.3  | 22.4 to 50.0   | 0.4 | 0.3 to 0.6 |
|                     | Female | 5 to 9   | 2.1  | 2.0 to 2.3   | 35.1  | 25.3 to 44.6   | 0.4 | 0.3 to 0.6 |
|                     | Female | 10 to 14 | 4.3  | 3.9 to 4.7   | 38    | 27.2 to 48.8   | 0.5 | 0.4 to 0.6 |
|                     | Female | 15 to 19 | 6.8  | 6.2 to 7.5   | 58.1  | 39.6 to 74.6   | 0.8 | 0.6 to 1.1 |
|                     | Both   | 1 to 4   | 1    | 0.9 to 1.0   | 55.7  | 37.2 to 76.6   | 0.7 | 0.4 to 0.9 |
|                     | Both   | 5 to 9   | 2.9  | 2.7 to 3.0   | 38.7  | 31.8 to 46.1   | 0.5 | 0.4 to 0.6 |
|                     | Both   | 10 to 14 | 5.6  | 5.3 to 6.0   | 43.6  | 36.5 to 51.8   | 0.6 | 0.5 to 0.7 |
|                     | Both   | 15 to 19 | 8.8  | 8.3 to 9.5   | 104.8 | 86.7 to 133.0  | 1.5 | 1.2 to 1.9 |
| Southeast Asia      | Male   | 1 to 4   | 1.3  | 1.1 to 1.6   | 50.1  | 33.0 to 73.2   | 0.6 | 0.4 to 0.9 |
|                     | Male   | 5 to 9   | 4    | 3.4 to 4.8   | 24.4  | 16.6 to 35.9   | 0.3 | 0.2 to 0.4 |
|                     | Male   | 10 to 14 | 8    | 6.9 to 9.2   | 42.6  | 30.3 to 59.0   | 0.6 | 0.4 to 0.8 |
|                     | Male   | 15 to 19 | 12.8 | 11.0 to 15.0 | 140.8 | 104.9 to 185.1 | 2   | 1.5 to 2.6 |
|                     | Female | 1 to 4   | 0.8  | 0.6 to 0.9   | 28.1  | 17.4 to 40.9   | 0.3 | 0.2 to 0.5 |
|                     | Female | 5 to 9   | 2.4  | 2.0 to 2.8   | 26.8  | 18.8 to 42.6   | 0.3 | 0.2 to 0.5 |
|                     | Female | 10 to 14 | 4.8  | 4.0 to 5.7   | 34.7  | 23.8 to 56.9   | 0.5 | 0.3 to 0.8 |
|                     | Female | 15 to 19 | 7.9  | 6.5 to 9.5   | 64    | 45.5 to 90.3   | 0.9 | 0.6 to 1.3 |
|                     | Both   | 1 to 4   | 1.1  | 0.9 to 1.2   | 39.4  | 28.3 to 53.8   | 0.5 | 0.3 to 0.6 |
|                     | Both   | 5 to 9   | 3.2  | 2.8 to 3.6   | 25.6  | 19.0 to 35.3   | 0.3 | 0.2 to 0.4 |
|                     | Both   | 10 to 14 | 6.4  | 5.7 to 7.2   | 38.7  | 29.5 to 53.3   | 0.5 | 0.4 to 0.7 |
|                     | Both   | 15 to 19 | 10.4 | 9.2 to 11.7  | 103.1 | 83.0 to 128.2  | 1.5 | 1.2 to 1.8 |
| Oceania             | Male   | 1 to 4   | 1.3  | 1.0 to 1.8   | 122.8 | 50.6 to 265.4  | 1.5 | 0.6 to 3.1 |

|                |        |          |      |             |       |                |     |            |
|----------------|--------|----------|------|-------------|-------|----------------|-----|------------|
|                | Male   | 5 to 9   | 4    | 3.0 to 5.2  | 81.3  | 45.0 to 138.5  | 1   | 0.6 to 1.7 |
|                | Male   | 10 to 14 | 7.9  | 6.0 to 10.1 | 48.3  | 29.8 to 74.1   | 0.6 | 0.4 to 1.0 |
|                | Male   | 15 to 19 | 12.7 | 9.6 to 16.1 | 203.6 | 127.4 to 325.8 | 2.9 | 1.8 to 4.7 |
|                | Female | 1 to 4   | 0.8  | 0.5 to 1.1  | 60.5  | 27.2 to 123.0  | 0.7 | 0.3 to 1.5 |
|                | Female | 5 to 9   | 2.4  | 1.7 to 3.1  | 43.9  | 24.0 to 77.1   | 0.5 | 0.3 to 1.0 |
|                | Female | 10 to 14 | 4.9  | 3.6 to 6.3  | 79.9  | 47.4 to 132.8  | 1.1 | 0.6 to 1.8 |
|                | Female | 15 to 19 | 8.1  | 6.0 to 10.4 | 43    | 26.8 to 68.7   | 0.6 | 0.4 to 1.0 |
|                | Both   | 1 to 4   | 1.1  | 0.8 to 1.4  | 92.7  | 43.7 to 186.9  | 1.1 | 0.5 to 2.2 |
|                | Both   | 5 to 9   | 3.2  | 2.6 to 4.0  | 63.3  | 38.5 to 102.8  | 0.8 | 0.5 to 1.3 |
|                | Both   | 10 to 14 | 6.4  | 5.2 to 7.8  | 63.5  | 42.5 to 92.2   | 0.8 | 0.6 to 1.2 |
|                | Both   | 15 to 19 | 10.4 | 8.4 to 12.6 | 125.8 | 81.6 to 190.6  | 1.8 | 1.2 to 2.7 |
|                |        |          |      |             |       |                |     |            |
| Central Asia   | Male   | 1 to 4   | 0.7  | 0.6 to 0.8  | 20    | 13.6 to 28.2   | 0.2 | 0.2 to 0.3 |
|                | Male   | 5 to 9   | 2.2  | 1.8 to 2.6  | 20.9  | 15.3 to 28.0   | 0.3 | 0.2 to 0.3 |
|                | Male   | 10 to 14 | 4.5  | 3.7 to 5.3  | 20.1  | 15.0 to 26.9   | 0.3 | 0.2 to 0.4 |
|                | Male   | 15 to 19 | 7    | 5.7 to 8.4  | 76.5  | 55.9 to 102.5  | 1.1 | 0.8 to 1.5 |
|                | Female | 1 to 4   | 0.5  | 0.4 to 0.6  | 18.1  | 9.5 to 26.3    | 0.2 | 0.1 to 0.3 |
|                | Female | 5 to 9   | 1.4  | 1.2 to 1.7  | 19.5  | 12.0 to 25.5   | 0.2 | 0.1 to 0.3 |
|                | Female | 10 to 14 | 2.7  | 2.2 to 3.2  | 23    | 16.0 to 32.4   | 0.3 | 0.2 to 0.4 |
|                | Female | 15 to 19 | 4.1  | 3.3 to 5.1  | 46.4  | 32.5 to 62.5   | 0.7 | 0.5 to 0.9 |
|                | Both   | 1 to 4   | 0.6  | 0.5 to 0.7  | 19.1  | 14.0 to 25.0   | 0.2 | 0.2 to 0.3 |
|                | Both   | 5 to 9   | 1.8  | 1.6 to 2.1  | 20.2  | 15.9 to 24.8   | 0.3 | 0.2 to 0.3 |
|                | Both   | 10 to 14 | 3.6  | 3.2 to 4.1  | 21.5  | 17.3 to 26.8   | 0.3 | 0.2 to 0.4 |
|                | Both   | 15 to 19 | 5.6  | 4.9 to 6.4  | 61.8  | 49.0 to 76.9   | 0.9 | 0.7 to 1.1 |
|                |        |          |      |             |       |                |     |            |
| Central Europe | Male   | 1 to 4   | 0.7  | 0.5 to 0.8  | 19.1  | 12.0 to 30.6   | 0.2 | 0.1 to 0.4 |
|                | Male   | 5 to 9   | 2.1  | 1.7 to 2.7  | 13.4  | 9.1 to 18.2    | 0.2 | 0.1 to 0.2 |
|                | Male   | 10 to 14 | 4.2  | 3.4 to 5.0  | 22.8  | 16.9 to 29.1   | 0.3 | 0.2 to 0.4 |
|                | Male   | 15 to 19 | 6.4  | 5.2 to 7.8  | 47.2  | 34.7 to 59.1   | 0.7 | 0.5 to 0.8 |
|                | Female | 1 to 4   | 0.5  | 0.4 to 0.6  | 17.4  | 10.8 to 28.9   | 0.2 | 0.1 to 0.3 |

|                          |        |          |      |              |      |              |     |            |
|--------------------------|--------|----------|------|--------------|------|--------------|-----|------------|
|                          | Female | 5 to 9   | 1.5  | 1.2 to 1.8   | 13.7 | 9.5 to 18.4  | 0.2 | 0.1 to 0.2 |
|                          | Female | 10 to 14 | 3    | 2.5 to 3.6   | 21.7 | 14.7 to 26.9 | 0.3 | 0.2 to 0.4 |
|                          | Female | 15 to 19 | 4.7  | 3.9 to 5.8   | 32   | 22.4 to 40.3 | 0.4 | 0.3 to 0.6 |
|                          | Both   | 1 to 4   | 0.6  | 0.5 to 0.7   | 18.3 | 12.3 to 27.8 | 0.2 | 0.1 to 0.3 |
|                          | Both   | 5 to 9   | 1.8  | 1.6 to 2.2   | 13.6 | 10.2 to 17.7 | 0.2 | 0.1 to 0.2 |
|                          | Both   | 10 to 14 | 3.6  | 3.1 to 4.1   | 22.3 | 17.1 to 26.7 | 0.3 | 0.2 to 0.4 |
|                          | Both   | 15 to 19 | 5.6  | 4.8 to 6.5   | 39.7 | 30.8 to 47.2 | 0.6 | 0.4 to 0.7 |
| Eastern Europe           | Male   | 1 to 4   | 0.4  | 0.2 to 0.7   | 3.7  | 2.0 to 5.7   | 0   | 0.0 to 0.1 |
|                          | Male   | 5 to 9   | 1.3  | 0.7 to 2.1   | 5.2  | 2.9 to 7.8   | 0.1 | 0.0 to 0.1 |
|                          | Male   | 10 to 14 | 2.6  | 1.6 to 3.9   | 9.9  | 6.3 to 14.0  | 0.1 | 0.1 to 0.2 |
|                          | Male   | 15 to 19 | 4    | 2.4 to 6.0   | 40.4 | 27.2 to 56.7 | 0.6 | 0.4 to 0.8 |
|                          | Female | 1 to 4   | 0.3  | 0.2 to 0.6   | 4.7  | 1.6 to 7.4   | 0.1 | 0.0 to 0.1 |
|                          | Female | 5 to 9   | 1    | 0.5 to 1.9   | 7.2  | 4.5 to 11.9  | 0.1 | 0.1 to 0.1 |
|                          | Female | 10 to 14 | 1.9  | 1.2 to 3.1   | 12.4 | 6.4 to 17.1  | 0.2 | 0.1 to 0.2 |
|                          | Female | 15 to 19 | 2.9  | 1.8 to 4.9   | 36.2 | 19.1 to 49.5 | 0.5 | 0.3 to 0.7 |
|                          | Both   | 1 to 4   | 0.4  | 0.2 to 0.6   | 4.2  | 2.3 to 6.1   | 0   | 0.0 to 0.1 |
|                          | Both   | 5 to 9   | 1.2  | 0.7 to 1.8   | 6.2  | 4.3 to 8.3   | 0.1 | 0.1 to 0.1 |
|                          | Both   | 10 to 14 | 2.3  | 1.6 to 3.1   | 11.1 | 7.7 to 14.1  | 0.1 | 0.1 to 0.2 |
|                          | Both   | 15 to 19 | 3.4  | 2.4 to 4.9   | 38.3 | 27.8 to 48.7 | 0.5 | 0.4 to 0.7 |
| High-income Asia Pacific | Male   | 1 to 4   | 1.8  | 1.3 to 2.5   | 10.5 | 6.5 to 15.8  | 0.1 | 0.1 to 0.2 |
|                          | Male   | 5 to 9   | 5.4  | 3.9 to 6.9   | 7.3  | 4.8 to 9.8   | 0.1 | 0.1 to 0.1 |
|                          | Male   | 10 to 14 | 10.5 | 7.9 to 13.3  | 14.1 | 9.5 to 18.2  | 0.2 | 0.1 to 0.2 |
|                          | Male   | 15 to 19 | 17   | 12.7 to 22.0 | 22.5 | 16.0 to 30.1 | 0.3 | 0.2 to 0.4 |
|                          | Female | 1 to 4   | 1    | 0.7 to 1.4   | 7.9  | 5.2 to 13.8  | 0.1 | 0.1 to 0.2 |
|                          | Female | 5 to 9   | 3    | 2.2 to 3.9   | 9.4  | 6.1 to 12.9  | 0.1 | 0.1 to 0.2 |
|                          | Female | 10 to 14 | 6.1  | 4.7 to 7.8   | 10.4 | 7.7 to 15.4  | 0.1 | 0.1 to 0.2 |
|                          | Female | 15 to 19 | 10.2 | 7.6 to 13.0  | 17.2 | 12.7 to 26.9 | 0.2 | 0.2 to 0.4 |



|                |        |          |      |              |      |              |     |            |
|----------------|--------|----------|------|--------------|------|--------------|-----|------------|
|                | Both   | 1 to 4   | 1.4  | 1.1 to 1.8   | 9.3  | 6.4 to 13.4  | 0.1 | 0.1 to 0.2 |
|                | Both   | 5 to 9   | 4.2  | 3.3 to 5.1   | 8.3  | 6.2 to 10.4  | 0.1 | 0.1 to 0.1 |
|                | Both   | 10 to 14 | 8.4  | 6.8 to 10.0  | 12.3 | 9.7 to 15.1  | 0.1 | 0.1 to 0.2 |
|                | Both   | 15 to 19 | 13.7 | 11.1 to 16.6 | 20   | 15.8 to 25.0 | 0.3 | 0.2 to 0.3 |
| Australasia    | Male   | 1 to 4   | 1.4  | 0.9 to 2.0   | 2.6  | 1.5 to 4.1   | 0   | 0.0 to 0.0 |
|                | Male   | 5 to 9   | 4.1  | 2.8 to 5.5   | 2.5  | 1.7 to 3.6   | 0   | 0.0 to 0.0 |
|                | Male   | 10 to 14 | 8.1  | 5.8 to 10.4  | 5.8  | 4.0 to 7.9   | 0.1 | 0.0 to 0.1 |
|                | Male   | 15 to 19 | 13.4 | 9.3 to 17.6  | 14.2 | 9.0 to 19.7  | 0.2 | 0.1 to 0.2 |
|                | Female | 1 to 4   | 0.9  | 0.6 to 1.3   | 2.6  | 1.5 to 3.7   | 0   | 0.0 to 0.0 |
|                | Female | 5 to 9   | 2.6  | 1.8 to 3.7   | 3    | 2.0 to 4.4   | 0   | 0.0 to 0.1 |
|                | Female | 10 to 14 | 5.2  | 3.6 to 7.0   | 5.8  | 3.9 to 7.8   | 0.1 | 0.0 to 0.1 |
|                | Female | 15 to 19 | 8.5  | 5.9 to 11.8  | 12.9 | 7.6 to 17.5  | 0.2 | 0.1 to 0.2 |
|                | Both   | 1 to 4   | 1.1  | 0.9 to 1.5   | 2.6  | 1.7 to 3.7   | 0   | 0.0 to 0.0 |
|                | Both   | 5 to 9   | 3.4  | 2.6 to 4.3   | 2.8  | 2.1 to 3.6   | 0   | 0.0 to 0.0 |
|                | Both   | 10 to 14 | 6.7  | 5.3 to 8.3   | 5.8  | 4.3 to 7.4   | 0.1 | 0.0 to 0.1 |
|                | Both   | 15 to 19 | 11.1 | 8.6 to 13.6  | 13.5 | 9.4 to 17.2  | 0.2 | 0.1 to 0.2 |
| Western Europe | Male   | 1 to 4   | 1.2  | 1.0 to 1.4   | 6.9  | 4.3 to 9.6   | 0.1 | 0.0 to 0.1 |
|                | Male   | 5 to 9   | 3.3  | 2.8 to 3.8   | 5.7  | 4.1 to 7.5   | 0.1 | 0.0 to 0.1 |
|                | Male   | 10 to 14 | 6.1  | 5.3 to 7.0   | 11.3 | 8.5 to 14.2  | 0.1 | 0.1 to 0.2 |
|                | Male   | 15 to 19 | 9.6  | 8.5 to 11.0  | 20.3 | 15.2 to 26.0 | 0.3 | 0.2 to 0.4 |
|                | Female | 1 to 4   | 0.9  | 0.8 to 1.1   | 6.6  | 4.8 to 9.7   | 0.1 | 0.1 to 0.1 |
|                | Female | 5 to 9   | 2.6  | 2.2 to 3.0   | 5.9  | 4.5 to 9.5   | 0.1 | 0.1 to 0.1 |
|                | Female | 10 to 14 | 4.9  | 4.2 to 5.7   | 11.3 | 8.4 to 14.8  | 0.1 | 0.1 to 0.2 |
|                | Female | 15 to 19 | 7.9  | 6.7 to 9.2   | 17.1 | 12.4 to 23.0 | 0.2 | 0.2 to 0.3 |
|                | Both   | 1 to 4   | 1    | 0.9 to 1.2   | 6.7  | 5.0 to 8.8   | 0.1 | 0.1 to 0.1 |
|                | Both   | 5 to 9   | 2.9  | 2.6 to 3.3   | 5.8  | 4.6 to 7.5   | 0.1 | 0.1 to 0.1 |
|                | Both   | 10 to 14 | 5.5  | 5.0 to 6.2   | 11.3 | 9.1 to 13.3  | 0.1 | 0.1 to 0.2 |

|                           |        |          |      |              |      |               |     |            |
|---------------------------|--------|----------|------|--------------|------|---------------|-----|------------|
|                           | Both   | 15 to 19 | 8.8  | 7.9 to 9.7   | 18.8 | 15.1 to 22.6  | 0.3 | 0.2 to 0.3 |
| Southern Latin America    | Male   | 1 to 4   | 1.3  | 1.0 to 1.8   | 25.8 | 14.1 to 43.1  | 0.3 | 0.2 to 0.5 |
|                           | Male   | 5 to 9   | 3.8  | 2.9 to 4.8   | 22.3 | 14.6 to 31.5  | 0.3 | 0.2 to 0.4 |
|                           | Male   | 10 to 14 | 7.2  | 5.6 to 8.9   | 34.3 | 24.3 to 47.0  | 0.4 | 0.3 to 0.6 |
|                           | Male   | 15 to 19 | 11.4 | 8.7 to 14.2  | 79.1 | 54.8 to 112.0 | 1.1 | 0.8 to 1.6 |
|                           | Female | 1 to 4   | 0.6  | 0.4 to 0.8   | 15.3 | 8.8 to 26.4   | 0.2 | 0.1 to 0.3 |
|                           | Female | 5 to 9   | 1.6  | 1.1 to 2.3   | 16.7 | 11.1 to 24.9  | 0.2 | 0.1 to 0.3 |
|                           | Female | 10 to 14 | 3.1  | 2.3 to 4.2   | 28.4 | 20.5 to 40.6  | 0.4 | 0.3 to 0.5 |
|                           | Female | 15 to 19 | 5    | 3.6 to 6.6   | 49.8 | 33.4 to 68.1  | 0.7 | 0.5 to 1.0 |
|                           | Both   | 1 to 4   | 1    | 0.7 to 1.2   | 20.6 | 12.4 to 32.3  | 0.2 | 0.1 to 0.4 |
|                           | Both   | 5 to 9   | 2.7  | 2.1 to 3.3   | 19.6 | 14.0 to 26.4  | 0.2 | 0.2 to 0.3 |
|                           | Both   | 10 to 14 | 5.2  | 4.2 to 6.2   | 31.4 | 24.3 to 40.2  | 0.4 | 0.3 to 0.5 |
|                           | Both   | 15 to 19 | 8.2  | 6.7 to 9.9   | 64.7 | 48.7 to 82.7  | 0.9 | 0.7 to 1.2 |
| High-income North America | Male   | 1 to 4   | 2.7  | 1.8 to 4.0   | 18.1 | 9.5 to 30.2   | 0.2 | 0.1 to 0.4 |
|                           | Male   | 5 to 9   | 9.4  | 5.7 to 12.9  | 11.1 | 7.4 to 15.7   | 0.1 | 0.1 to 0.2 |
|                           | Male   | 10 to 14 | 20.4 | 14.1 to 27.6 | 16.9 | 11.5 to 23.3  | 0.2 | 0.1 to 0.3 |
|                           | Male   | 15 to 19 | 35.4 | 24.8 to 48.0 | 28.8 | 19.4 to 40.8  | 0.3 | 0.2 to 0.5 |
|                           | Female | 1 to 4   | 1.9  | 1.0 to 3.0   | 16.7 | 8.1 to 25.6   | 0.2 | 0.1 to 0.3 |
|                           | Female | 5 to 9   | 7.6  | 4.8 to 11.3  | 10   | 6.1 to 14.0   | 0.1 | 0.1 to 0.2 |
|                           | Female | 10 to 14 | 16.8 | 11.8 to 23.1 | 14.2 | 9.2 to 18.8   | 0.2 | 0.1 to 0.2 |
|                           | Female | 15 to 19 | 28.8 | 18.9 to 41.4 | 22.6 | 13.5 to 30.8  | 0.3 | 0.1 to 0.4 |
|                           | Both   | 1 to 4   | 2.3  | 1.7 to 3.1   | 17.4 | 9.8 to 25.8   | 0.2 | 0.1 to 0.3 |
|                           | Both   | 5 to 9   | 8.5  | 6.4 to 11.0  | 10.6 | 7.6 to 14.0   | 0.1 | 0.1 to 0.2 |
|                           | Both   | 10 to 14 | 18.7 | 14.9 to 23.5 | 15.6 | 11.6 to 19.7  | 0.2 | 0.1 to 0.2 |

|                       |        |          |      |              |       |                |     |            |
|-----------------------|--------|----------|------|--------------|-------|----------------|-----|------------|
|                       | Both   | 15 to 19 | 32.2 | 24.7 to 40.8 | 25.8  | 18.6 to 33.0   | 0.3 | 0.2 to 0.4 |
| Caribbean             | Male   | 1 to 4   | 0.8  | 0.6 to 1.0   | 252.5 | 121.2 to 459.1 | 3   | 1.4 to 5.4 |
|                       | Male   | 5 to 9   | 2.5  | 2.0 to 3.1   | 89.4  | 52.8 to 139.5  | 1.1 | 0.7 to 1.8 |
|                       | Male   | 10 to 14 | 4.8  | 4.0 to 6.0   | 80.6  | 54.3 to 117.5  | 1.1 | 0.7 to 1.6 |
|                       | Male   | 15 to 19 | 7.6  | 6.3 to 9.5   | 81.1  | 53.9 to 117.4  | 1.2 | 0.8 to 1.7 |
|                       | Female | 1 to 4   | 0.6  | 0.5 to 0.8   | 237.8 | 125.8 to 419.6 | 2.8 | 1.5 to 5.0 |
|                       | Female | 5 to 9   | 1.9  | 1.5 to 2.4   | 82.6  | 50.3 to 128.3  | 1   | 0.6 to 1.6 |
|                       | Female | 10 to 14 | 3.6  | 2.9 to 4.3   | 69.3  | 44.3 to 100.7  | 0.9 | 0.6 to 1.3 |
|                       | Female | 15 to 19 | 5.5  | 4.4 to 6.6   | 79.4  | 51.4 to 117.2  | 1.1 | 0.7 to 1.7 |
|                       | Both   | 1 to 4   | 0.7  | 0.6 to 0.9   | 245.3 | 148.7 to 379.9 | 2.9 | 1.8 to 4.5 |
|                       | Both   | 5 to 9   | 2.2  | 1.9 to 2.6   | 86.1  | 59.4 to 120.1  | 1.1 | 0.7 to 1.5 |
|                       | Both   | 10 to 14 | 4.2  | 3.7 to 5.0   | 75    | 56.8 to 98.9   | 1   | 0.8 to 1.3 |
|                       | Both   | 15 to 19 | 6.6  | 5.7 to 7.7   | 80.3  | 59.4 to 104.9  | 1.1 | 0.8 to 1.5 |
| Andean Latin America  | Male   | 1 to 4   | 0.8  | 0.6 to 1.1   | 74.2  | 41.1 to 130.6  | 0.9 | 0.5 to 1.5 |
|                       | Male   | 5 to 9   | 2.3  | 1.7 to 3.2   | 47.2  | 32.0 to 67.8   | 0.6 | 0.4 to 0.9 |
|                       | Male   | 10 to 14 | 4.2  | 3.3 to 5.4   | 80.8  | 58.2 to 108.2  | 1.1 | 0.8 to 1.5 |
|                       | Male   | 15 to 19 | 6.4  | 4.8 to 8.1   | 129.6 | 89.4 to 185.3  | 1.9 | 1.3 to 2.7 |
|                       | Female | 1 to 4   | 0.6  | 0.4 to 0.7   | 55    | 30.6 to 107.4  | 0.6 | 0.4 to 1.3 |
|                       | Female | 5 to 9   | 1.5  | 1.2 to 2.0   | 33.9  | 19.4 to 47.0   | 0.4 | 0.2 to 0.6 |
|                       | Female | 10 to 14 | 2.7  | 2.1 to 3.4   | 60.7  | 38.3 to 80.7   | 0.8 | 0.5 to 1.1 |
|                       | Female | 15 to 19 | 3.8  | 2.9 to 5.0   | 92.6  | 51.9 to 122.8  | 1.3 | 0.7 to 1.8 |
|                       | Both   | 1 to 4   | 0.7  | 0.5 to 0.9   | 64.8  | 41.8 to 102.8  | 0.8 | 0.5 to 1.2 |
|                       | Both   | 5 to 9   | 1.9  | 1.6 to 2.4   | 40.7  | 28.7 to 52.0   | 0.5 | 0.4 to 0.7 |
|                       | Both   | 10 to 14 | 3.5  | 2.9 to 4.2   | 70.9  | 56.1 to 87.4   | 0.9 | 0.7 to 1.2 |
|                       | Both   | 15 to 19 | 5.1  | 4.2 to 6.2   | 111.4 | 83.1 to 143.6  | 1.6 | 1.2 to 2.1 |
| Central Latin America | Male   | 1 to 4   | 1.1  | 1.0 to 1.2   | 46.6  | 32.7 to 62.8   | 0.5 | 0.4 to 0.7 |
|                       | Male   | 5 to 9   | 3.3  | 3.1 to 3.6   | 26.2  | 19.5 to 33.2   | 0.3 | 0.2 to 0.4 |

|                              |        |          |      |             |       |                |     |            |
|------------------------------|--------|----------|------|-------------|-------|----------------|-----|------------|
|                              | Male   | 10 to 14 | 6.6  | 6.1 to 7.2  | 47.4  | 37.7 to 58.9   | 0.6 | 0.5 to 0.8 |
|                              | Male   | 15 to 19 | 10.5 | 9.5 to 11.4 | 83.4  | 64.4 to 109.5  | 1.2 | 0.9 to 1.6 |
|                              | Female | 1 to 4   | 0.7  | 0.6 to 0.8  | 39.6  | 22.9 to 52.8   | 0.5 | 0.3 to 0.6 |
|                              | Female | 5 to 9   | 2.2  | 2.0 to 2.4  | 21.9  | 14.6 to 27.6   | 0.3 | 0.2 to 0.3 |
|                              | Female | 10 to 14 | 4.4  | 4.1 to 4.8  | 39    | 28.6 to 49.0   | 0.5 | 0.4 to 0.6 |
|                              | Female | 15 to 19 | 7.1  | 6.4 to 7.7  | 65.1  | 47.4 to 88.0   | 0.9 | 0.7 to 1.3 |
|                              | Both   | 1 to 4   | 0.9  | 0.8 to 1.0  | 43.2  | 32.2 to 54.0   | 0.5 | 0.4 to 0.6 |
|                              | Both   | 5 to 9   | 2.8  | 2.6 to 3.0  | 24.1  | 19.1 to 28.8   | 0.3 | 0.2 to 0.4 |
|                              | Both   | 10 to 14 | 5.5  | 5.2 to 5.9  | 43.3  | 36.5 to 51.0   | 0.6 | 0.5 to 0.7 |
|                              | Both   | 15 to 19 | 8.8  | 8.3 to 9.4  | 74.4  | 61.9 to 89.7   | 1.1 | 0.9 to 1.3 |
| Tropical Latin America       | Male   | 1 to 4   | 0.6  | 0.4 to 1.0  | 28.5  | 13.2 to 51.3   | 0.3 | 0.2 to 0.6 |
|                              | Male   | 5 to 9   | 1.9  | 1.2 to 3.0  | 28.6  | 20.5 to 39.2   | 0.4 | 0.3 to 0.5 |
|                              | Male   | 10 to 14 | 3.7  | 2.4 to 5.5  | 47.3  | 32.8 to 63.5   | 0.6 | 0.4 to 0.9 |
|                              | Male   | 15 to 19 | 5.7  | 3.4 to 8.8  | 84.9  | 55.4 to 124.6  | 1.2 | 0.8 to 1.8 |
|                              | Female | 1 to 4   | 0.5  | 0.3 to 0.8  | 20.2  | 10.5 to 33.6   | 0.2 | 0.1 to 0.4 |
|                              | Female | 5 to 9   | 1.6  | 1.0 to 2.3  | 23.9  | 17.3 to 35.4   | 0.3 | 0.2 to 0.4 |
|                              | Female | 10 to 14 | 3    | 2.0 to 4.3  | 42.4  | 30.6 to 64.2   | 0.6 | 0.4 to 0.9 |
|                              | Female | 15 to 19 | 4.6  | 2.8 to 6.9  | 60    | 41.2 to 96.1   | 0.9 | 0.6 to 1.4 |
|                              | Both   | 1 to 4   | 0.6  | 0.4 to 0.8  | 24.5  | 14.4 to 38.8   | 0.3 | 0.2 to 0.5 |
|                              | Both   | 5 to 9   | 1.8  | 1.3 to 2.4  | 26.3  | 20.6 to 34.1   | 0.3 | 0.3 to 0.4 |
|                              | Both   | 10 to 14 | 3.4  | 2.5 to 4.4  | 44.9  | 34.8 to 58.2   | 0.6 | 0.5 to 0.8 |
|                              | Both   | 15 to 19 | 5.2  | 3.6 to 7.1  | 72.7  | 54.3 to 97.8   | 1   | 0.8 to 1.4 |
| North Africa and Middle East | Male   | 1 to 4   | 0.1  | 0.1 to 0.2  | 227.8 | 160.8 to 315.6 | 2.7 | 1.9 to 3.7 |
|                              | Male   | 5 to 9   | 0.4  | 0.3 to 0.5  | 158.8 | 128.4 to 193.5 | 2   | 1.6 to 2.4 |
|                              | Male   | 10 to 14 | 0.8  | 0.6 to 0.9  | 171.4 | 142.8 to 205.7 | 2.3 | 1.9 to 2.8 |
|                              | Male   | 15 to 19 | 1.3  | 1.0 to 1.6  | 279.2 | 221.5 to 343.0 | 4   | 3.2 to 5.0 |
|                              | Female | 1 to 4   | 0.1  | 0.1 to 0.1  | 195.2 | 141.1 to 274.2 | 2.3 | 1.7 to 3.2 |
|                              | Female | 5 to 9   | 0.3  | 0.2 to 0.4  | 113.7 | 90.0 to 156.5  | 1.4 | 1.1 to 2.0 |

|                            |        |          |     |             |       |                |     |            |
|----------------------------|--------|----------|-----|-------------|-------|----------------|-----|------------|
|                            | Female | 10 to 14 | 0.7 | 0.5 to 0.8  | 107.8 | 85.6 to 145.7  | 1.4 | 1.2 to 2.0 |
|                            | Female | 15 to 19 | 1.1 | 0.8 to 1.3  | 135.2 | 100.0 to 175.7 | 1.9 | 1.4 to 2.5 |
|                            | Both   | 1 to 4   | 0.1 | 0.1 to 0.1  | 211.9 | 163.8 to 273.7 | 2.5 | 1.9 to 3.2 |
|                            | Both   | 5 to 9   | 0.4 | 0.3 to 0.4  | 136.7 | 113.3 to 162.4 | 1.7 | 1.4 to 2.0 |
|                            | Both   | 10 to 14 | 0.7 | 0.6 to 0.8  | 140.4 | 120.7 to 167.3 | 1.9 | 1.6 to 2.3 |
|                            | Both   | 15 to 19 | 1.2 | 1.0 to 1.4  | 209.1 | 175.9 to 244.5 | 3   | 2.5 to 3.5 |
| South Asia                 | Male   | 1 to 4   | 1   | 0.7 to 1.4  | 61.2  | 31.9 to 108.4  | 0.7 | 0.4 to 1.3 |
|                            | Male   | 5 to 9   | 3.1 | 2.2 to 4.0  | 46.2  | 27.1 to 76.0   | 0.6 | 0.3 to 1.0 |
|                            | Male   | 10 to 14 | 6   | 4.4 to 7.8  | 94.4  | 61.7 to 145.0  | 1.3 | 0.8 to 1.9 |
|                            | Male   | 15 to 19 | 9.2 | 6.6 to 12.5 | 146.1 | 94.0 to 221.1  | 2.1 | 1.3 to 3.2 |
|                            | Female | 1 to 4   | 0.7 | 0.5 to 0.9  | 46.8  | 20.7 to 113.6  | 0.6 | 0.2 to 1.3 |
|                            | Female | 5 to 9   | 2.1 | 1.5 to 2.8  | 69.5  | 37.7 to 140.6  | 0.9 | 0.5 to 1.8 |
|                            | Female | 10 to 14 | 4.3 | 3.3 to 5.8  | 75.1  | 42.9 to 131.4  | 1   | 0.6 to 1.8 |
|                            | Female | 15 to 19 | 7.2 | 5.3 to 9.5  | 108.7 | 63.4 to 174.6  | 1.6 | 0.9 to 2.5 |
|                            | Both   | 1 to 4   | 0.9 | 0.7 to 1.1  | 54.4  | 31.0 to 96.1   | 0.6 | 0.4 to 1.1 |
|                            | Both   | 5 to 9   | 2.6 | 2.1 to 3.2  | 57.3  | 36.8 to 94.5   | 0.7 | 0.5 to 1.2 |
|                            | Both   | 10 to 14 | 5.2 | 4.2 to 6.2  | 85.2  | 59.6 to 121.8  | 1.1 | 0.8 to 1.6 |
|                            | Both   | 15 to 19 | 8.2 | 6.6 to 10.1 | 128.2 | 92.5 to 174.7  | 1.8 | 1.3 to 2.5 |
| Central Sub-Saharan Africa | Male   | 1 to 4   | 0.5 | 0.4 to 0.8  | 308.2 | 125.1 to 646.2 | 3.6 | 1.5 to 7.7 |
|                            | Male   | 5 to 9   | 1.6 | 1.1 to 2.2  | 81.6  | 41.2 to 145.4  | 1   | 0.5 to 1.8 |
|                            | Male   | 10 to 14 | 3   | 2.2 to 4.0  | 81.8  | 45.6 to 129.2  | 1.1 | 0.6 to 1.7 |
|                            | Male   | 15 to 19 | 4.5 | 3.2 to 6.3  | 140.5 | 85.9 to 206.3  | 2   | 1.2 to 3.0 |
|                            | Female | 1 to 4   | 0.3 | 0.2 to 0.4  | 258.1 | 76.1 to 640.9  | 3.1 | 0.9 to 7.6 |
|                            | Female | 5 to 9   | 0.9 | 0.5 to 1.3  | 104.1 | 51.8 to 191.2  | 1.3 | 0.7 to 2.4 |
|                            | Female | 10 to 14 | 1.7 | 1.2 to 2.5  | 92.3  | 52.5 to 154.4  | 1.2 | 0.7 to 2.1 |
|                            | Female | 15 to 19 | 2.7 | 1.8 to 3.7  | 132.5 | 79.6 to 212.6  | 1.9 | 1.1 to 3.1 |
|                            | Both   | 1 to 4   | 0.4 | 0.3 to 0.5  | 283.4 | 146.2 to 532.2 | 3.4 | 1.7 to 6.3 |
|                            | Both   | 5 to 9   | 1.2 | 0.9 to 1.6  | 92.8  | 54.8 to 153.3  | 1.2 | 0.7 to 1.9 |

|                             |        |          |     |            |       |               |     |            |
|-----------------------------|--------|----------|-----|------------|-------|---------------|-----|------------|
|                             | Both   | 10 to 14 | 2.4 | 1.9 to 3.0 | 87.1  | 58.0 to 125.5 | 1.2 | 0.8 to 1.7 |
|                             | Both   | 15 to 19 | 3.6 | 2.8 to 4.6 | 136.5 | 96.7 to 186.2 | 2   | 1.4 to 2.7 |
| Eastern Sub-Saharan Africa  | Male   | 1 to 4   | 0.6 | 0.5 to 0.8 | 17.1  | 9.6 to 28.6   | 0.2 | 0.1 to 0.3 |
|                             | Male   | 5 to 9   | 1.8 | 1.5 to 2.2 | 15.4  | 9.5 to 22.5   | 0.2 | 0.1 to 0.3 |
|                             | Male   | 10 to 14 | 3.1 | 2.6 to 3.6 | 21.6  | 14.5 to 30.4  | 0.3 | 0.2 to 0.4 |
|                             | Male   | 15 to 19 | 4   | 3.4 to 4.8 | 82.9  | 58.1 to 111.5 | 1.2 | 0.8 to 1.6 |
|                             | Female | 1 to 4   | 0.3 | 0.2 to 0.3 | 13.3  | 6.4 to 29.4   | 0.2 | 0.1 to 0.3 |
|                             | Female | 5 to 9   | 0.8 | 0.7 to 1.0 | 10    | 6.2 to 17.6   | 0.1 | 0.1 to 0.2 |
|                             | Female | 10 to 14 | 1.5 | 1.3 to 1.8 | 12    | 7.5 to 19.6   | 0.2 | 0.1 to 0.3 |
|                             | Female | 15 to 19 | 2.2 | 1.9 to 2.6 | 38.2  | 22.0 to 56.8  | 0.5 | 0.3 to 0.8 |
|                             | Both   | 1 to 4   | 0.5 | 0.4 to 0.5 | 15.2  | 9.5 to 24.3   | 0.2 | 0.1 to 0.3 |
|                             | Both   | 5 to 9   | 1.3 | 1.2 to 1.5 | 12.7  | 8.9 to 17.2   | 0.2 | 0.1 to 0.2 |
|                             | Both   | 10 to 14 | 2.3 | 2.0 to 2.6 | 16.8  | 12.0 to 22.2  | 0.2 | 0.2 to 0.3 |
|                             | Both   | 15 to 19 | 3.1 | 2.7 to 3.5 | 60.6  | 45.6 to 77.0  | 0.9 | 0.7 to 1.1 |
| Southern Sub-Saharan Africa | Male   | 1 to 4   | 0.4 | 0.3 to 0.6 | 162   | 69.7 to 318.3 | 1.9 | 0.8 to 3.8 |
|                             | Male   | 5 to 9   | 1.3 | 0.8 to 1.8 | 45.1  | 24.2 to 76.1  | 0.6 | 0.3 to 1.0 |
|                             | Male   | 10 to 14 | 2.6 | 1.8 to 3.5 | 40.4  | 25.0 to 62.1  | 0.5 | 0.3 to 0.8 |
|                             | Male   | 15 to 19 | 4.2 | 2.9 to 5.8 | 104.3 | 67.6 to 148.0 | 1.5 | 1.0 to 2.1 |
|                             | Female | 1 to 4   | 0.3 | 0.2 to 0.4 | 293.6 | 56.9 to 637.0 | 3.5 | 0.7 to 7.5 |
|                             | Female | 5 to 9   | 0.9 | 0.6 to 1.3 | 57.2  | 21.7 to 113.3 | 0.7 | 0.3 to 1.4 |
|                             | Female | 10 to 14 | 2   | 1.4 to 2.7 | 36.1  | 17.9 to 58.7  | 0.5 | 0.2 to 0.8 |
|                             | Female | 15 to 19 | 3.3 | 2.3 to 4.6 | 70.1  | 39.0 to 103.0 | 1   | 0.6 to 1.5 |
|                             | Both   | 1 to 4   | 0.3 | 0.2 to 0.4 | 227.2 | 77.8 to 413.8 | 2.7 | 0.9 to 4.9 |
|                             | Both   | 5 to 9   | 1.1 | 0.8 to 1.4 | 51.1  | 25.8 to 83.5  | 0.6 | 0.3 to 1.1 |
|                             | Both   | 10 to 14 | 2.3 | 1.8 to 2.8 | 38.3  | 24.0 to 55.0  | 0.5 | 0.3 to 0.7 |
|                             | Both   | 15 to 19 | 3.7 | 2.9 to 4.7 | 87.3  | 61.2 to 115.6 | 1.3 | 0.9 to 1.7 |
| Western Sub-Saharan Africa  | Male   | 1 to 4   | 0.5 | 0.4 to 0.7 | 166.1 | 71.7 to 307.4 | 2   | 0.8 to 3.6 |
|                             | Male   | 5 to 9   | 1.5 | 1.1 to 2.0 | 68.7  | 38.2 to 114.5 | 0.9 | 0.5 to 1.4 |

|  |        |          |     |            |       |               |     |            |
|--|--------|----------|-----|------------|-------|---------------|-----|------------|
|  | Male   | 10 to 14 | 2.9 | 2.3 to 3.7 | 58.1  | 34.5 to 86.7  | 0.8 | 0.5 to 1.2 |
|  | Male   | 15 to 19 | 4.5 | 3.6 to 5.7 | 66.3  | 44.7 to 93.5  | 0.9 | 0.6 to 1.3 |
|  | Female | 1 to 4   | 0.3 | 0.2 to 0.4 | 140.4 | 60.3 to 417.5 | 1.7 | 0.7 to 4.9 |
|  | Female | 5 to 9   | 0.8 | 0.6 to 1.1 | 42.8  | 24.8 to 82.3  | 0.5 | 0.3 to 1.0 |
|  | Female | 10 to 14 | 1.7 | 1.3 to 2.3 | 45.5  | 29.5 to 83.2  | 0.6 | 0.4 to 1.1 |
|  | Female | 15 to 19 | 2.9 | 2.3 to 3.8 | 68.1  | 44.6 to 99.8  | 1   | 0.6 to 1.4 |
|  | Both   | 1 to 4   | 0.4 | 0.3 to 0.5 | 153.5 | 85.7 to 292.4 | 1.8 | 1.0 to 3.5 |
|  | Both   | 5 to 9   | 1.2 | 0.9 to 1.5 | 56    | 35.9 to 84.2  | 0.7 | 0.5 to 1.1 |
|  | Both   | 10 to 14 | 2.3 | 2.0 to 2.8 | 51.9  | 36.7 to 72.2  | 0.7 | 0.5 to 1.0 |
|  | Both   | 15 to 19 | 3.7 | 3.1 to 4.4 | 67.2  | 50.3 to 88.2  | 1   | 0.7 to 1.3 |
