# Supplementary material
Source: publisher figshare collection journal article supplement (https://karger.figshare.com/articles/dataset/_/4055256)
Supplement: Supplementary file 2 [file 1]

| Ischemic Stroke 2013 |        |           | Prevalence |              | DALY |                | Deaths |              |
|----------------------|--------|-----------|------------|--------------|------|----------------|--------|--------------|
| Country              | Sex    | Age group | Mean       | 95% Ui       | Mean | 95% Ui         | Mean   | 95% Ui       |
| China                | Male   | 1 to 4    | 0.3        | (0.3 to 0.4) | 8.3  | (4.2 to 14.2)  | 0.1    | (0.0 to 0.2) |
| China                | Male   | 5 to 9    | 0.9        | (0.8 to 1.1) | 5.5  | (3.3 to 8.4)   | 0.1    | (0.0 to 0.1) |
| China                | Male   | 10 to 14  | 2          | (1.7 to 2.2) | 6.9  | (4.4 to 10.1)  | 0.1    | (0.1 to 0.1) |
| China                | Male   | 15 to 19  | 3.3        | (2.8 to 3.7) | 16.3 | (10.6 to 24.6) | 0.2    | (0.1 to 0.3) |
| China                | Female | 1 to 4    | 0.2        | (0.2 to 0.2) | 7.5  | (3.4 to 12.6)  | 0.1    | (0.0 to 0.1) |
| China                | Female | 5 to 9    | 0.7        | (0.6 to 0.8) | 6.9  | (3.8 to 9.5)   | 0.1    | (0.0 to 0.1) |
| China                | Female | 10 to 14  | 1.5        | (1.3 to 1.7) | 4.9  | (2.7 to 6.8)   | 0.1    | (0.0 to 0.1) |
| China                | Female | 15 to 19  | 2.6        | (2.2 to 3.0) | 7    | (3.6 to 10.7)  | 0.1    | (0.0 to 0.1) |
| China                | Both   | 1 to 4    | 0.3        | (0.2 to 0.3) | 7.9  | (4.4 to 12.9)  | 0.1    | (0.1 to 0.2) |
| China                | Both   | 5 to 9    | 0.8        | (0.7 to 0.9) | 6.1  | (4.2 to 8.4)   | 0.1    | (0.1 to 0.1) |
| China                | Both   | 10 to 14  | 1.7        | (1.6 to 1.9) | 6    | (4.3 to 8.1)   | 0.1    | (0.1 to 0.1) |
| China                | Both   | 15 to 19  | 3          | (2.6 to 3.3) | 12   | (8.3 to 16.4)  | 0.2    | (0.1 to 0.2) |
| North Korea          | Male   | 1 to 4    | 0.4        | (0.2 to 0.7) | 10.5 | (2.7 to 26.8)  | 0.1    | (0.0 to 0.3) |
| North Korea          | Male   | 5 to 9    | 1.2        | (0.6 to 2.2) | 7.2  | (2.2 to 16.6)  | 0.1    | (0.0 to 0.2) |
| North Korea          | Male   | 10 to 14  | 2.4        | (1.2 to 4.0) | 8.1  | (3.2 to 15.6)  | 0.1    | (0.0 to 0.2) |
| North Korea          | Male   | 15 to 19  | 3.9        | (1.7 to 6.5) | 24   | (9.1 to 52.8)  | 0.3    | (0.1 to 0.8) |
| North Korea          | Female | 1 to 4    | 0.2        | (0.1 to 0.4) | 8.2  | (2.3 to 20.1)  | 0.1    | (0.0 to 0.2) |
| North Korea          | Female | 5 to 9    | 0.7        | (0.2 to 1.2) | 7.6  | (2.5 to 16.9)  | 0.1    | (0.0 to 0.2) |
| North Korea          | Female | 10 to 14  | 1.6        | (0.6 to 2.5) | 5.4  | (2.0 to 11.1)  | 0.1    | (0.0 to 0.1) |
| North Korea          | Female | 15 to 19  | 2.8        | (1.2 to 5.1) | 9.9  | (4.2 to 18.9)  | 0.1    | (0.1 to 0.3) |
| North Korea          | Both   | 1 to 4    | 0.3        | (0.2 to 0.5) | 9.4  | (3.3 to 19.7)  | 0.1    | (0.0 to 0.2) |
| North Korea          | Both   | 5 to 9    | 1          | (0.6 to 1.5) | 7.4  | (3.5 to 13.8)  | 0.1    | (0.0 to 0.2) |
| North Korea          | Both   | 10 to 14  | 2          | (1.2 to 2.9) | 6.8  | (3.6 to 11.5)  | 0.1    | (0.0 to 0.2) |
| North Korea          | Both   | 15 to 19  | 3.3        | (1.8 to 5.2) | 17.1 | (8.3 to 32.8)  | 0.2    | (0.1 to 0.5) |
| Taiwan               | Male   | 1 to 4    | 0.5        | (0.1 to 1.0) | 1.7  | (0.6 to 4.0)   | 0      | (0.0 to 0.0) |
| Taiwan               | Male   | 5 to 9    | 1.4        | (0.4 to 2.9) | 1.5  | (0.8 to 2.7)   | 0      | (0.0 to 0.0) |
| Taiwan               | Male   | 10 to 14  | 2.9        | (1.3 to 5.0) | 1.6  | (0.9 to 2.6)   | 0      | (0.0 to 0.0) |
| Taiwan               | Male   | 15 to 19  | 4.6        | (2.2 to 7.9) | 3.9  | (2.1 to 6.6)   | 0      | (0.0 to 0.1) |
| Taiwan               | Female | 1 to 4    | 0.4        | (0.2 to 0.8) | 1.6  | (0.6 to 3.3)   | 0      | (0.0 to 0.0) |
| Taiwan               | Female | 5 to 9    | 1.2        | (0.4 to 2.2) | 1.7  | (0.8 to 3.2)   | 0      | (0.0 to 0.0) |
| Taiwan               | Female | 10 to 14  | 2.6        | (1.3 to 4.1) | 2.7  | (1.3 to 5.7)   | 0      | (0.0 to 0.1) |

|           |        |          |     |              |      |                 |     |              |
|-----------|--------|----------|-----|--------------|------|-----------------|-----|--------------|
| Taiwan    | Female | 15 to 19 | 4.3 | (2.1 to 7.9) | 2.2  | (1.0 to 3.6)    | 0   | (0.0 to 0.0) |
| Taiwan    | Both   | 1 to 4   | 0.4 | (0.2 to 0.7) | 1.7  | (0.8 to 3.1)    | 0   | (0.0 to 0.0) |
| Taiwan    | Both   | 5 to 9   | 1.3 | (0.6 to 2.2) | 1.6  | (0.9 to 2.5)    | 0   | (0.0 to 0.0) |
| Taiwan    | Both   | 10 to 14 | 2.7 | (1.6 to 4.0) | 2.1  | (1.3 to 3.7)    | 0   | (0.0 to 0.0) |
| Taiwan    | Both   | 15 to 19 | 4.5 | (2.8 to 6.5) | 3.1  | (1.9 to 4.7)    | 0   | (0.0 to 0.1) |
| Cambodia  | Male   | 1 to 4   | 0.3 | (0.1 to 0.6) | 32.6 | (9.4 to 77.9)   | 0.4 | (0.1 to 0.9) |
| Cambodia  | Male   | 5 to 9   | 1   | (0.4 to 1.7) | 13.6 | (4.9 to 29.3)   | 0.2 | (0.1 to 0.4) |
| Cambodia  | Male   | 10 to 14 | 2.1 | (1.2 to 3.5) | 9    | (3.7 to 19.8)   | 0.1 | (0.0 to 0.3) |
| Cambodia  | Male   | 15 to 19 | 3.7 | (2.0 to 6.1) | 46.4 | (18.0 to 102.0) | 0.7 | (0.3 to 1.5) |
| Cambodia  | Female | 1 to 4   | 0.2 | (0.1 to 0.4) | 20.5 | (6.7 to 49.1)   | 0.2 | (0.1 to 0.6) |
| Cambodia  | Female | 5 to 9   | 0.8 | (0.4 to 1.3) | 16.7 | (5.7 to 35.9)   | 0.2 | (0.1 to 0.5) |
| Cambodia  | Female | 10 to 14 | 1.7 | (0.9 to 2.7) | 10.3 | (3.8 to 22.3)   | 0.1 | (0.0 to 0.3) |
| Cambodia  | Female | 15 to 19 | 3   | (1.6 to 4.9) | 36.6 | (14.9 to 71.2)  | 0.5 | (0.2 to 1.0) |
| Cambodia  | Both   | 1 to 4   | 0.3 | (0.1 to 0.4) | 26.7 | (10.4 to 53.8)  | 0.3 | (0.1 to 0.6) |
| Cambodia  | Both   | 5 to 9   | 0.9 | (0.5 to 1.4) | 15.1 | (7.0 to 28.6)   | 0.2 | (0.1 to 0.4) |
| Cambodia  | Both   | 10 to 14 | 1.9 | (1.2 to 2.7) | 9.6  | (5.0 to 17.4)   | 0.1 | (0.1 to 0.2) |
| Cambodia  | Both   | 15 to 19 | 3.4 | (2.1 to 4.9) | 41.7 | (21.4 to 71.9)  | 0.6 | (0.3 to 1.0) |
| Indonesia | Male   | 1 to 4   | 0.4 | (0.2 to 0.6) | 3.5  | (1.1 to 8.6)    | 0   | (0.0 to 0.1) |
| Indonesia | Male   | 5 to 9   | 1.1 | (0.5 to 1.9) | 1.4  | (0.6 to 2.9)    | 0   | (0.0 to 0.0) |
| Indonesia | Male   | 10 to 14 | 2.3 | (1.4 to 3.4) | 1.1  | (0.6 to 2.0)    | 0   | (0.0 to 0.0) |
| Indonesia | Male   | 15 to 19 | 4   | (2.5 to 6.0) | 22.9 | (10.0 to 43.3)  | 0.3 | (0.1 to 0.6) |
| Indonesia | Female | 1 to 4   | 0.2 | (0.1 to 0.4) | 1.7  | (0.5 to 3.8)    | 0   | (0.0 to 0.0) |
| Indonesia | Female | 5 to 9   | 0.8 | (0.4 to 1.3) | 2.4  | (0.9 to 4.9)    | 0   | (0.0 to 0.1) |
| Indonesia | Female | 10 to 14 | 1.7 | (1.0 to 2.6) | 2.9  | (1.2 to 6.2)    | 0   | (0.0 to 0.1) |
| Indonesia | Female | 15 to 19 | 3   | (1.8 to 4.8) | 15   | (7.6 to 27.4)   | 0.2 | (0.1 to 0.4) |
| Indonesia | Both   | 1 to 4   | 0.3 | (0.2 to 0.5) | 2.6  | (1.0 to 5.5)    | 0   | (0.0 to 0.1) |
| Indonesia | Both   | 5 to 9   | 0.9 | (0.6 to 1.4) | 1.9  | (0.9 to 3.4)    | 0   | (0.0 to 0.0) |
| Indonesia | Both   | 10 to 14 | 2   | (1.4 to 2.8) | 2    | (1.0 to 3.6)    | 0   | (0.0 to 0.0) |
| Indonesia | Both   | 15 to 19 | 3.5 | (2.5 to 4.9) | 19.1 | (10.9 to 30.2)  | 0.3 | (0.1 to 0.4) |
| Laos      | Male   | 1 to 4   | 0.4 | (0.2 to 0.6) | 77.2 | (16.3 to 223.1) | 0.9 | (0.2 to 2.6) |
| Laos      | Male   | 5 to 9   | 1.1 | (0.5 to 1.8) | 20.9 | (6.8 to 49.2)   | 0.3 | (0.1 to 0.6) |
| Laos      | Male   | 10 to 14 | 2.2 | (1.3 to 3.4) | 11.5 | (4.7 to 24.8)   | 0.1 | (0.1 to 0.3) |
| Laos      | Male   | 15 to 19 | 3.8 | (2.4 to 5.7) | 48.9 | (18.4 to 104.8) | 0.7 | (0.3 to 1.5) |

|          |        |          |     |              |      |                 |     |              |
|----------|--------|----------|-----|--------------|------|-----------------|-----|--------------|
| Laos     | Female | 1 to 4   | 0.2 | (0.1 to 0.4) | 55.9 | (3.6 to 168.9)  | 0.7 | (0.0 to 2.0) |
| Laos     | Female | 5 to 9   | 0.8 | (0.3 to 1.3) | 26.6 | (4.2 to 72.9)   | 0.3 | (0.1 to 0.9) |
| Laos     | Female | 10 to 14 | 1.7 | (0.9 to 2.8) | 14.7 | (3.1 to 35.6)   | 0.2 | (0.0 to 0.5) |
| Laos     | Female | 15 to 19 | 3   | (1.5 to 4.9) | 44.9 | (12.6 to 95.9)  | 0.6 | (0.2 to 1.4) |
| Laos     | Both   | 1 to 4   | 0.3 | (0.2 to 0.4) | 66.8 | (13.8 to 152.6) | 0.8 | (0.2 to 1.8) |
| Laos     | Both   | 5 to 9   | 0.9 | (0.6 to 1.3) | 23.6 | (7.3 to 47.0)   | 0.3 | (0.1 to 0.6) |
| Laos     | Both   | 10 to 14 | 2   | (1.4 to 2.7) | 13   | (5.2 to 25.8)   | 0.2 | (0.1 to 0.3) |
| Laos     | Both   | 15 to 19 | 3.4 | (2.4 to 4.8) | 47   | (20.7 to 83.6)  | 0.7 | (0.3 to 1.2) |
| Malaysia | Male   | 1 to 4   | 0.4 | (0.2 to 0.6) | 3.2  | (1.1 to 7.7)    | 0   | (0.0 to 0.1) |
| Malaysia | Male   | 5 to 9   | 1.1 | (0.6 to 1.9) | 2.7  | (1.3 to 5.2)    | 0   | (0.0 to 0.1) |
| Malaysia | Male   | 10 to 14 | 2.4 | (1.5 to 3.8) | 2.6  | (1.4 to 4.7)    | 0   | (0.0 to 0.1) |
| Malaysia | Male   | 15 to 19 | 4   | (2.4 to 6.4) | 10.1 | (4.8 to 19.0)   | 0.1 | (0.1 to 0.3) |
| Malaysia | Female | 1 to 4   | 0.3 | (0.1 to 0.4) | 3.1  | (1.2 to 6.5)    | 0   | (0.0 to 0.1) |
| Malaysia | Female | 5 to 9   | 0.8 | (0.5 to 1.4) | 2    | (0.9 to 3.9)    | 0   | (0.0 to 0.0) |
| Malaysia | Female | 10 to 14 | 1.8 | (1.1 to 2.7) | 2    | (1.0 to 4.0)    | 0   | (0.0 to 0.0) |
| Malaysia | Female | 15 to 19 | 3.2 | (1.9 to 4.9) | 5.3  | (2.6 to 9.0)    | 0.1 | (0.0 to 0.1) |
| Malaysia | Both   | 1 to 4   | 0.3 | (0.2 to 0.5) | 3.2  | (1.5 to 6.3)    | 0   | (0.0 to 0.1) |
| Malaysia | Both   | 5 to 9   | 1   | (0.6 to 1.4) | 2.4  | (1.3 to 4.0)    | 0   | (0.0 to 0.0) |
| Malaysia | Both   | 10 to 14 | 2.1 | (1.4 to 2.9) | 2.3  | (1.4 to 3.8)    | 0   | (0.0 to 0.0) |
| Malaysia | Both   | 15 to 19 | 3.6 | (2.6 to 5.0) | 7.6  | (4.4 to 12.3)   | 0.1 | (0.1 to 0.2) |
| Maldives | Male   | 1 to 4   | 0.4 | (0.2 to 0.6) | 31.2 | (4.8 to 66.3)   | 0.4 | (0.1 to 0.8) |
| Maldives | Male   | 5 to 9   | 1.1 | (0.5 to 2.0) | 42.6 | (22.1 to 73.9)  | 0.5 | (0.3 to 0.9) |
| Maldives | Male   | 10 to 14 | 2.3 | (1.3 to 3.8) | 17.6 | (7.5 to 29.6)   | 0.2 | (0.1 to 0.4) |
| Maldives | Male   | 15 to 19 | 4   | (2.2 to 6.1) | 43.9 | (19.4 to 75.0)  | 0.6 | (0.3 to 1.1) |
| Maldives | Female | 1 to 4   | 0.2 | (0.1 to 0.4) | 20.5 | (6.1 to 46.7)   | 0.2 | (0.1 to 0.6) |
| Maldives | Female | 5 to 9   | 0.8 | (0.3 to 1.3) | 14.6 | (5.9 to 24.6)   | 0.2 | (0.1 to 0.3) |
| Maldives | Female | 10 to 14 | 1.7 | (1.0 to 2.6) | 10.3 | (3.0 to 29.9)   | 0.1 | (0.0 to 0.4) |
| Maldives | Female | 15 to 19 | 3   | (1.7 to 4.8) | 20.9 | (7.9 to 37.9)   | 0.3 | (0.1 to 0.5) |
| Maldives | Both   | 1 to 4   | 0.3 | (0.2 to 0.4) | 26   | (8.5 to 47.1)   | 0.3 | (0.1 to 0.6) |
| Maldives | Both   | 5 to 9   | 0.9 | (0.5 to 1.5) | 29   | (17.7 to 45.4)  | 0.4 | (0.2 to 0.6) |
| Maldives | Both   | 10 to 14 | 2   | (1.3 to 2.8) | 14.1 | (6.1 to 24.7)   | 0.2 | (0.1 to 0.3) |
| Maldives | Both   | 15 to 19 | 3.5 | (2.4 to 5.0) | 32.7 | (15.9 to 52.1)  | 0.5 | (0.2 to 0.7) |
| Myanmar  | Male   | 1 to 4   | 0.4 | (0.2 to 0.6) | 7.9  | (1.4 to 23.3)   | 0.1 | (0.0 to 0.3) |

|             |        |          |     |              |      |                |     |              |
|-------------|--------|----------|-----|--------------|------|----------------|-----|--------------|
| Myanmar     | Male   | 5 to 9   | 1.1 | (0.6 to 1.8) | 8.7  | (2.3 to 21.9)  | 0.1 | (0.0 to 0.3) |
| Myanmar     | Male   | 10 to 14 | 2.3 | (1.4 to 3.6) | 3.7  | (1.2 to 8.5)   | 0   | (0.0 to 0.1) |
| Myanmar     | Male   | 15 to 19 | 4   | (2.4 to 6.3) | 18.1 | (3.9 to 44.1)  | 0.3 | (0.0 to 0.6) |
| Myanmar     | Female | 1 to 4   | 0.2 | (0.1 to 0.4) | 0.4  | (0.1 to 1.0)   | 0   | (0.0 to 0.0) |
| Myanmar     | Female | 5 to 9   | 0.8 | (0.4 to 1.3) | 2.3  | (0.5 to 10.4)  | 0   | (0.0 to 0.1) |
| Myanmar     | Female | 10 to 14 | 1.7 | (1.0 to 2.6) | 2.5  | (0.6 to 11.2)  | 0   | (0.0 to 0.1) |
| Myanmar     | Female | 15 to 19 | 3   | (1.7 to 4.6) | 4.4  | (1.3 to 10.3)  | 0.1 | (0.0 to 0.1) |
| Myanmar     | Both   | 1 to 4   | 0.3 | (0.2 to 0.4) | 4.2  | (0.9 to 12.1)  | 0   | (0.0 to 0.1) |
| Myanmar     | Both   | 5 to 9   | 0.9 | (0.6 to 1.4) | 5.5  | (1.8 to 12.0)  | 0.1 | (0.0 to 0.1) |
| Myanmar     | Both   | 10 to 14 | 2   | (1.4 to 2.8) | 3.1  | (1.1 to 8.0)   | 0   | (0.0 to 0.1) |
| Myanmar     | Both   | 15 to 19 | 3.5 | (2.4 to 4.9) | 11.2 | (3.4 to 25.3)  | 0.2 | (0.0 to 0.4) |
| Philippines | Male   | 1 to 4   | 0.4 | (0.2 to 0.6) | 9.9  | (3.9 to 20.0)  | 0.1 | (0.0 to 0.2) |
| Philippines | Male   | 5 to 9   | 1.1 | (0.5 to 1.8) | 4.8  | (2.1 to 8.9)   | 0.1 | (0.0 to 0.1) |
| Philippines | Male   | 10 to 14 | 2.3 | (1.2 to 3.5) | 6.6  | (3.3 to 12.3)  | 0.1 | (0.0 to 0.2) |
| Philippines | Male   | 15 to 19 | 4.1 | (2.3 to 6.2) | 23.7 | (12.2 to 41.7) | 0.3 | (0.2 to 0.6) |
| Philippines | Female | 1 to 4   | 0.2 | (0.1 to 0.4) | 8.2  | (2.8 to 17.2)  | 0.1 | (0.0 to 0.2) |
| Philippines | Female | 5 to 9   | 0.7 | (0.3 to 1.2) | 4.3  | (2.0 to 7.7)   | 0.1 | (0.0 to 0.1) |
| Philippines | Female | 10 to 14 | 1.6 | (0.9 to 2.5) | 5.4  | (2.7 to 12.4)  | 0.1 | (0.0 to 0.2) |
| Philippines | Female | 15 to 19 | 2.8 | (1.6 to 4.7) | 12.2 | (5.9 to 20.0)  | 0.2 | (0.1 to 0.3) |
| Philippines | Both   | 1 to 4   | 0.3 | (0.2 to 0.4) | 9.1  | (4.2 to 16.9)  | 0.1 | (0.0 to 0.2) |
| Philippines | Both   | 5 to 9   | 0.9 | (0.6 to 1.3) | 4.6  | (2.6 to 7.3)   | 0.1 | (0.0 to 0.1) |
| Philippines | Both   | 10 to 14 | 2   | (1.3 to 2.6) | 6    | (3.6 to 10.5)  | 0.1 | (0.0 to 0.1) |
| Philippines | Both   | 15 to 19 | 3.5 | (2.4 to 4.9) | 18.1 | (11.0 to 28.0) | 0.3 | (0.2 to 0.4) |
| Sri Lanka   | Male   | 1 to 4   | 0.3 | (0.2 to 0.5) | 28.1 | (7.9 to 57.2)  | 0.3 | (0.1 to 0.7) |
| Sri Lanka   | Male   | 5 to 9   | 1.1 | (0.5 to 1.7) | 15.1 | (5.2 to 26.5)  | 0.2 | (0.1 to 0.3) |
| Sri Lanka   | Male   | 10 to 14 | 2.3 | (1.4 to 3.4) | 13.1 | (6.1 to 23.3)  | 0.2 | (0.1 to 0.3) |
| Sri Lanka   | Male   | 15 to 19 | 3.9 | (2.3 to 5.9) | 30.4 | (12.4 to 55.5) | 0.4 | (0.2 to 0.8) |
| Sri Lanka   | Female | 1 to 4   | 0.2 | (0.1 to 0.4) | 20.2 | (5.9 to 50.6)  | 0.2 | (0.1 to 0.6) |
| Sri Lanka   | Female | 5 to 9   | 0.8 | (0.4 to 1.5) | 18.4 | (6.3 to 31.0)  | 0.2 | (0.1 to 0.4) |
| Sri Lanka   | Female | 10 to 14 | 1.8 | (1.0 to 2.8) | 12.9 | (5.5 to 23.9)  | 0.2 | (0.1 to 0.3) |
| Sri Lanka   | Female | 15 to 19 | 3.1 | (1.7 to 4.5) | 20.3 | (5.3 to 40.7)  | 0.3 | (0.1 to 0.6) |
| Sri Lanka   | Both   | 1 to 4   | 0.3 | (0.2 to 0.4) | 24.2 | (8.4 to 52.6)  | 0.3 | (0.1 to 0.6) |
| Sri Lanka   | Both   | 5 to 9   | 0.9 | (0.6 to 1.3) | 16.7 | (6.6 to 26.5)  | 0.2 | (0.1 to 0.3) |

|             |        |          |     |              |      |                |     |              |
|-------------|--------|----------|-----|--------------|------|----------------|-----|--------------|
| Sri Lanka   | Both   | 10 to 14 | 2   | (1.4 to 2.7) | 13   | (6.6 to 21.2)  | 0.2 | (0.1 to 0.3) |
| Sri Lanka   | Both   | 15 to 19 | 3.5 | (2.4 to 4.8) | 25.4 | (10.1 to 44.2) | 0.4 | (0.1 to 0.6) |
| Thailand    | Male   | 1 to 4   | 0.4 | (0.2 to 0.6) | 7.7  | (2.3 to 19.1)  | 0.1 | (0.0 to 0.2) |
| Thailand    | Male   | 5 to 9   | 1.1 | (0.6 to 1.8) | 6.1  | (2.3 to 11.8)  | 0.1 | (0.0 to 0.1) |
| Thailand    | Male   | 10 to 14 | 2.3 | (1.3 to 3.4) | 4.9  | (2.6 to 9.1)   | 0.1 | (0.0 to 0.1) |
| Thailand    | Male   | 15 to 19 | 3.8 | (2.2 to 5.8) | 24.4 | (11.6 to 43.8) | 0.3 | (0.2 to 0.6) |
| Thailand    | Female | 1 to 4   | 0.2 | (0.1 to 0.4) | 6.9  | (2.3 to 16.7)  | 0.1 | (0.0 to 0.2) |
| Thailand    | Female | 5 to 9   | 0.8 | (0.4 to 1.4) | 6.4  | (2.6 to 12.8)  | 0.1 | (0.0 to 0.2) |
| Thailand    | Female | 10 to 14 | 1.7 | (0.9 to 2.8) | 4.8  | (2.3 to 8.9)   | 0.1 | (0.0 to 0.1) |
| Thailand    | Female | 15 to 19 | 3   | (1.7 to 4.8) | 11.7 | (5.4 to 21.0)  | 0.2 | (0.1 to 0.3) |
| Thailand    | Both   | 1 to 4   | 0.3 | (0.2 to 0.5) | 7.3  | (3.2 to 15.9)  | 0.1 | (0.0 to 0.2) |
| Thailand    | Both   | 5 to 9   | 1   | (0.6 to 1.4) | 6.3  | (3.1 to 11.0)  | 0.1 | (0.0 to 0.1) |
| Thailand    | Both   | 10 to 14 | 2   | (1.4 to 2.8) | 4.8  | (3.0 to 7.9)   | 0.1 | (0.0 to 0.1) |
| Thailand    | Both   | 15 to 19 | 3.4 | (2.3 to 4.7) | 18.1 | (10.5 to 28.3) | 0.3 | (0.1 to 0.4) |
| Timor-Leste | Male   | 1 to 4   | 0.3 | (0.2 to 0.6) | 33.4 | (9.5 to 82.4)  | 0.4 | (0.1 to 1.0) |
| Timor-Leste | Male   | 5 to 9   | 1.1 | (0.5 to 1.8) | 11.8 | (4.2 to 25.2)  | 0.1 | (0.0 to 0.3) |
| Timor-Leste | Male   | 10 to 14 | 2.3 | (1.4 to 3.5) | 7.2  | (2.7 to 16.0)  | 0.1 | (0.0 to 0.2) |
| Timor-Leste | Male   | 15 to 19 | 3.9 | (2.4 to 5.9) | 32.1 | (10.5 to 76.5) | 0.5 | (0.1 to 1.1) |
| Timor-Leste | Female | 1 to 4   | 0.2 | (0.1 to 0.4) | 21.8 | (4.9 to 61.6)  | 0.3 | (0.1 to 0.7) |
| Timor-Leste | Female | 5 to 9   | 0.8 | (0.4 to 1.3) | 16.8 | (4.6 to 48.6)  | 0.2 | (0.1 to 0.6) |
| Timor-Leste | Female | 10 to 14 | 1.7 | (1.0 to 2.6) | 10.7 | (2.9 to 36.1)  | 0.1 | (0.0 to 0.5) |
| Timor-Leste | Female | 15 to 19 | 2.9 | (1.6 to 4.6) | 29.3 | (8.6 to 87.9)  | 0.4 | (0.1 to 1.3) |
| Timor-Leste | Both   | 1 to 4   | 0.3 | (0.2 to 0.4) | 27.7 | (11.5 to 60.2) | 0.3 | (0.1 to 0.7) |
| Timor-Leste | Both   | 5 to 9   | 0.9 | (0.6 to 1.4) | 14.3 | (6.6 to 30.3)  | 0.2 | (0.1 to 0.4) |
| Timor-Leste | Both   | 10 to 14 | 2   | (1.4 to 2.8) | 8.9  | (3.9 to 21.8)  | 0.1 | (0.0 to 0.3) |
| Timor-Leste | Both   | 15 to 19 | 3.4 | (2.4 to 4.7) | 30.7 | (14.0 to 63.7) | 0.4 | (0.2 to 0.9) |
| Vietnam     | Male   | 1 to 4   | 0.4 | (0.2 to 0.6) | 5.2  | (1.8 to 11.5)  | 0.1 | (0.0 to 0.1) |
| Vietnam     | Male   | 5 to 9   | 1.1 | (0.5 to 1.9) | 0.3  | (0.2 to 0.5)   | 0   | (0.0 to 0.0) |
| Vietnam     | Male   | 10 to 14 | 2.3 | (1.3 to 3.5) | 0.5  | (0.3 to 0.8)   | 0   | (0.0 to 0.0) |
| Vietnam     | Male   | 15 to 19 | 3.8 | (2.1 to 6.3) | 11.8 | (5.0 to 22.7)  | 0.2 | (0.1 to 0.3) |
| Vietnam     | Female | 1 to 4   | 0.2 | (0.1 to 0.4) | 0.7  | (0.2 to 1.8)   | 0   | (0.0 to 0.0) |
| Vietnam     | Female | 5 to 9   | 0.7 | (0.4 to 1.2) | 0.7  | (0.3 to 1.4)   | 0   | (0.0 to 0.0) |
| Vietnam     | Female | 10 to 14 | 1.6 | (1.0 to 2.5) | 0.8  | (0.4 to 1.6)   | 0   | (0.0 to 0.0) |

|                  |        |          |     |              |       |                 |     |              |
|------------------|--------|----------|-----|--------------|-------|-----------------|-----|--------------|
| Vietnam          | Female | 15 to 19 | 2.9 | (1.7 to 4.5) | 4.3   | (1.7 to 9.0)    | 0.1 | (0.0 to 0.1) |
| Vietnam          | Both   | 1 to 4   | 0.3 | (0.2 to 0.5) | 3.1   | (1.2 to 6.5)    | 0   | (0.0 to 0.1) |
| Vietnam          | Both   | 5 to 9   | 0.9 | (0.5 to 1.4) | 0.5   | (0.3 to 0.8)    | 0   | (0.0 to 0.0) |
| Vietnam          | Both   | 10 to 14 | 2   | (1.3 to 2.7) | 0.6   | (0.4 to 1.0)    | 0   | (0.0 to 0.0) |
| Vietnam          | Both   | 15 to 19 | 3.4 | (2.2 to 4.8) | 8.1   | (4.1 to 14.4)   | 0.1 | (0.1 to 0.2) |
| Fiji             | Male   | 1 to 4   | 0.3 | (0.1 to 0.6) | 64.8  | (17.3 to 156.8) | 0.8 | (0.2 to 1.9) |
| Fiji             | Male   | 5 to 9   | 1   | (0.4 to 1.7) | 56.6  | (21.1 to 124.3) | 0.7 | (0.3 to 1.6) |
| Fiji             | Male   | 10 to 14 | 2.2 | (1.1 to 3.3) | 16.5  | (6.5 to 33.3)   | 0.2 | (0.1 to 0.4) |
| Fiji             | Male   | 15 to 19 | 3.7 | (2.1 to 5.5) | 51.2  | (21.1 to 104.4) | 0.7 | (0.3 to 1.5) |
| Fiji             | Female | 1 to 4   | 0.2 | (0.1 to 0.4) | 24.2  | (6.6 to 60.9)   | 0.3 | (0.1 to 0.7) |
| Fiji             | Female | 5 to 9   | 0.7 | (0.4 to 1.1) | 8     | (3.0 to 16.9)   | 0.1 | (0.0 to 0.2) |
| Fiji             | Female | 10 to 14 | 1.5 | (0.9 to 2.4) | 18.5  | (7.2 to 37.9)   | 0.2 | (0.1 to 0.5) |
| Fiji             | Female | 15 to 19 | 2.7 | (1.6 to 4.1) | 8.7   | (3.9 to 16.7)   | 0.1 | (0.1 to 0.2) |
| Fiji             | Both   | 1 to 4   | 0.3 | (0.2 to 0.4) | 45    | (13.7 to 102.2) | 0.5 | (0.2 to 1.2) |
| Fiji             | Both   | 5 to 9   | 0.9 | (0.5 to 1.3) | 33.1  | (13.7 to 70.6)  | 0.4 | (0.2 to 0.9) |
| Fiji             | Both   | 10 to 14 | 1.9 | (1.3 to 2.5) | 17.4  | (8.8 to 31.6)   | 0.2 | (0.1 to 0.4) |
| Fiji             | Both   | 15 to 19 | 3.2 | (2.2 to 4.3) | 30.6  | (14.1 to 57.4)  | 0.4 | (0.2 to 0.8) |
| Kiribati         | Male   | 1 to 4   | 0.3 | (0.2 to 0.5) | 146.5 | (53.5 to 312.0) | 1.7 | (0.6 to 3.7) |
| Kiribati         | Male   | 5 to 9   | 1   | (0.6 to 1.8) | 126   | (70.1 to 209.7) | 1.6 | (0.9 to 2.6) |
| Kiribati         | Male   | 10 to 14 | 2.2 | (1.3 to 3.4) | 38.8  | (18.9 to 75.5)  | 0.5 | (0.2 to 1.0) |
| Kiribati         | Male   | 15 to 19 | 3.6 | (2.3 to 5.6) | 116.8 | (58.9 to 197.6) | 1.7 | (0.8 to 2.9) |
| Kiribati         | Female | 1 to 4   | 0.2 | (0.1 to 0.4) | 37.7  | (12.2 to 103.9) | 0.4 | (0.1 to 1.2) |
| Kiribati         | Female | 5 to 9   | 0.7 | (0.4 to 1.2) | 7.4   | (2.8 to 17.5)   | 0.1 | (0.0 to 0.2) |
| Kiribati         | Female | 10 to 14 | 1.5 | (0.8 to 2.4) | 26.8  | (12.4 to 60.1)  | 0.4 | (0.2 to 0.8) |
| Kiribati         | Female | 15 to 19 | 2.6 | (1.3 to 4.1) | 10.9  | (4.5 to 23.1)   | 0.2 | (0.1 to 0.3) |
| Kiribati         | Both   | 1 to 4   | 0.3 | (0.2 to 0.4) | 93.8  | (37.0 to 197.3) | 1.1 | (0.4 to 2.3) |
| Kiribati         | Both   | 5 to 9   | 0.9 | (0.5 to 1.3) | 67.9  | (38.8 to 112.3) | 0.9 | (0.5 to 1.4) |
| Kiribati         | Both   | 10 to 14 | 1.9 | (1.3 to 2.6) | 32.9  | (19.8 to 57.4)  | 0.4 | (0.3 to 0.8) |
| Kiribati         | Both   | 15 to 19 | 3.1 | (2.2 to 4.4) | 65    | (35.4 to 105.6) | 0.9 | (0.5 to 1.5) |
| Marshall Islands | Male   | 1 to 4   | 0.3 | (0.1 to 0.5) | 53.1  | (10.3 to 166.3) | 0.6 | (0.1 to 2.0) |
| Marshall Islands | Male   | 5 to 9   | 1   | (0.5 to 1.8) | 63.9  | (18.7 to 153.1) | 0.8 | (0.2 to 1.9) |
| Marshall Islands | Male   | 10 to 14 | 2.2 | (1.2 to 3.6) | 19.7  | (7.5 to 41.0)   | 0.3 | (0.1 to 0.5) |
| Marshall Islands | Male   | 15 to 19 | 3.7 | (2.0 to 5.9) | 68.3  | (24.7 to 150.7) | 1   | (0.3 to 2.2) |

|                                |        |          |     |              |      |                 |     |              |
|--------------------------------|--------|----------|-----|--------------|------|-----------------|-----|--------------|
| Marshall Islands               | Female | 1 to 4   | 0.2 | (0.1 to 0.4) | 22.8 | (3.9 to 121.0)  | 0.3 | (0.0 to 1.4) |
| Marshall Islands               | Female | 5 to 9   | 0.7 | (0.4 to 1.3) | 7.4  | (2.1 to 27.3)   | 0.1 | (0.0 to 0.3) |
| Marshall Islands               | Female | 10 to 14 | 1.6 | (0.9 to 2.5) | 22   | (5.8 to 59.9)   | 0.3 | (0.1 to 0.8) |
| Marshall Islands               | Female | 15 to 19 | 2.7 | (1.5 to 4.6) | 11.4 | (4.4 to 25.5)   | 0.2 | (0.1 to 0.4) |
| Marshall Islands               | Both   | 1 to 4   | 0.3 | (0.2 to 0.4) | 38.3 | (10.4 to 125.0) | 0.5 | (0.1 to 1.5) |
| Marshall Islands               | Both   | 5 to 9   | 0.9 | (0.5 to 1.3) | 36.7 | (12.4 to 85.2)  | 0.5 | (0.2 to 1.1) |
| Marshall Islands               | Both   | 10 to 14 | 1.9 | (1.3 to 2.7) | 20.8 | (8.6 to 42.9)   | 0.3 | (0.1 to 0.6) |
| Marshall Islands               | Both   | 15 to 19 | 3.2 | (2.1 to 4.6) | 40.8 | (17.5 to 85.5)  | 0.6 | (0.2 to 1.2) |
| Federated States of Micronesia | Male   | 1 to 4   | 0.3 | (0.2 to 0.6) | 16.8 | (1.8 to 67.4)   | 0.2 | (0.0 to 0.8) |
| Federated States of Micronesia | Male   | 5 to 9   | 1   | (0.5 to 1.8) | 32.2 | (7.8 to 89.5)   | 0.4 | (0.1 to 1.1) |
| Federated States of Micronesia | Male   | 10 to 14 | 2.1 | (1.2 to 3.3) | 11.7 | (3.9 to 28.4)   | 0.2 | (0.0 to 0.4) |
| Federated States of Micronesia | Male   | 15 to 19 | 3.6 | (2.0 to 5.5) | 59.8 | (20.5 to 140.7) | 0.9 | (0.3 to 2.0) |
| Federated States of Micronesia | Female | 1 to 4   | 0.2 | (0.1 to 0.4) | 9    | (0.7 to 61.3)   | 0.1 | (0.0 to 0.7) |
| Federated States of Micronesia | Female | 5 to 9   | 0.7 | (0.4 to 1.1) | 4    | (0.7 to 19.4)   | 0   | (0.0 to 0.2) |
| Federated States of Micronesia | Female | 10 to 14 | 1.5 | (0.9 to 2.3) | 16.1 | (3.9 to 49.8)   | 0.2 | (0.0 to 0.7) |
| Federated States of Micronesia | Female | 15 to 19 | 2.7 | (1.5 to 4.1) | 9.8  | (3.4 to 23.6)   | 0.1 | (0.0 to 0.3) |
| Federated States of Micronesia | Both   | 1 to 4   | 0.3 | (0.2 to 0.4) | 13   | (2.2 to 61.1)   | 0.2 | (0.0 to 0.7) |
| Federated States of Micronesia | Both   | 5 to 9   | 0.8 | (0.5 to 1.3) | 18.6 | (5.0 to 54.3)   | 0.2 | (0.1 to 0.7) |
| Federated States of Micronesia | Both   | 10 to 14 | 1.8 | (1.3 to 2.5) | 13.8 | (5.3 to 36.5)   | 0.2 | (0.1 to 0.5) |
| Federated States of Micronesia | Both   | 15 to 19 | 3.1 | (2.1 to 4.3) | 35.5 | (14.3 to 79.9)  | 0.5 | (0.2 to 1.1) |
| Papua New Guinea               | Male   | 1 to 4   | 0.3 | (0.2 to 0.5) | 17.5 | (4.3 to 52.7)   | 0.2 | (0.1 to 0.6) |
| Papua New Guinea               | Male   | 5 to 9   | 1   | (0.5 to 1.6) | 18.8 | (6.6 to 38.6)   | 0.2 | (0.1 to 0.5) |
| Papua New Guinea               | Male   | 10 to 14 | 2   | (1.2 to 3.2) | 6    | (2.6 to 11.5)   | 0.1 | (0.0 to 0.2) |
| Papua New Guinea               | Male   | 15 to 19 | 3.5 | (2.1 to 5.3) | 19.2 | (7.4 to 41.9)   | 0.3 | (0.1 to 0.6) |
| Papua New Guinea               | Female | 1 to 4   | 0.2 | (0.1 to 0.3) | 6.5  | (1.4 to 19.5)   | 0.1 | (0.0 to 0.2) |
| Papua New Guinea               | Female | 5 to 9   | 0.7 | (0.4 to 1.1) | 2.5  | (0.7 to 6.8)    | 0   | (0.0 to 0.1) |
| Papua New Guinea               | Female | 10 to 14 | 1.4 | (0.9 to 2.2) | 8.2  | (3.1 to 18.8)   | 0.1 | (0.0 to 0.2) |
| Papua New Guinea               | Female | 15 to 19 | 2.5 | (1.5 to 3.9) | 3.8  | (1.5 to 8.9)    | 0   | (0.0 to 0.1) |
| Papua New Guinea               | Both   | 1 to 4   | 0.3 | (0.2 to 0.4) | 12.2 | (3.7 to 33.4)   | 0.1 | (0.0 to 0.4) |
| Papua New Guinea               | Both   | 5 to 9   | 0.8 | (0.5 to 1.3) | 11   | (4.5 to 22.8)   | 0.1 | (0.1 to 0.3) |
| Papua New Guinea               | Both   | 10 to 14 | 1.7 | (1.2 to 2.5) | 7.1  | (3.6 to 13.3)   | 0.1 | (0.0 to 0.2) |
| Papua New Guinea               | Both   | 15 to 19 | 3   | (2.1 to 4.2) | 11.7 | (5.2 to 23.3)   | 0.2 | (0.1 to 0.3) |
| Samoa                          | Male   | 1 to 4   | 0.3 | (0.2 to 0.6) | 11.5 | (0.8 to 46.4)   | 0.1 | (0.0 to 0.6) |

|                 |        |          |     |              |      |                 |     |              |
|-----------------|--------|----------|-----|--------------|------|-----------------|-----|--------------|
| Samoa           | Male   | 5 to 9   | 1   | (0.6 to 1.7) | 18.2 | (2.0 to 59.6)   | 0.2 | (0.0 to 0.7) |
| Samoa           | Male   | 10 to 14 | 2.1 | (1.2 to 3.3) | 8.6  | (1.5 to 28.2)   | 0.1 | (0.0 to 0.4) |
| Samoa           | Male   | 15 to 19 | 3.5 | (2.0 to 5.6) | 43.2 | (11.5 to 136.7) | 0.6 | (0.2 to 2.0) |
| Samoa           | Female | 1 to 4   | 0.2 | (0.1 to 0.4) | 4.5  | (0.2 to 30.9)   | 0.1 | (0.0 to 0.4) |
| Samoa           | Female | 5 to 9   | 0.7 | (0.3 to 1.1) | 3    | (0.3 to 20.5)   | 0   | (0.0 to 0.3) |
| Samoa           | Female | 10 to 14 | 1.5 | (0.8 to 2.3) | 10.5 | (1.9 to 46.4)   | 0.1 | (0.0 to 0.6) |
| Samoa           | Female | 15 to 19 | 2.6 | (1.5 to 4.0) | 6.8  | (1.7 to 24.5)   | 0.1 | (0.0 to 0.3) |
| Samoa           | Both   | 1 to 4   | 0.3 | (0.2 to 0.4) | 8.1  | (0.9 to 35.5)   | 0.1 | (0.0 to 0.4) |
| Samoa           | Both   | 5 to 9   | 0.8 | (0.5 to 1.2) | 10.9 | (1.7 to 37.7)   | 0.1 | (0.0 to 0.5) |
| Samoa           | Both   | 10 to 14 | 1.8 | (1.2 to 2.5) | 9.5  | (2.8 to 32.5)   | 0.1 | (0.0 to 0.4) |
| Samoa           | Both   | 15 to 19 | 3.1 | (2.0 to 4.3) | 25.9 | (8.4 to 77.9)   | 0.4 | (0.1 to 1.1) |
| Solomon Islands | Male   | 1 to 4   | 0.4 | (0.2 to 0.6) | 16.7 | (1.4 to 56.0)   | 0.2 | (0.0 to 0.7) |
| Solomon Islands | Male   | 5 to 9   | 1.1 | (0.6 to 1.9) | 32.1 | (5.4 to 94.9)   | 0.4 | (0.1 to 1.2) |
| Solomon Islands | Male   | 10 to 14 | 2.2 | (1.3 to 3.5) | 11.4 | (2.6 to 27.2)   | 0.1 | (0.0 to 0.4) |
| Solomon Islands | Male   | 15 to 19 | 3.6 | (1.9 to 5.5) | 51.1 | (14.0 to 119.5) | 0.7 | (0.2 to 1.7) |
| Solomon Islands | Female | 1 to 4   | 0.2 | (0.1 to 0.4) | 8.6  | (0.5 to 65.6)   | 0.1 | (0.0 to 0.8) |
| Solomon Islands | Female | 5 to 9   | 0.7 | (0.3 to 1.2) | 4.2  | (0.6 to 23.6)   | 0.1 | (0.0 to 0.3) |
| Solomon Islands | Female | 10 to 14 | 1.6 | (0.9 to 2.4) | 18.6 | (4.1 to 57.7)   | 0.2 | (0.1 to 0.8) |
| Solomon Islands | Female | 15 to 19 | 2.7 | (1.5 to 4.3) | 10.2 | (3.3 to 26.8)   | 0.1 | (0.0 to 0.4) |
| Solomon Islands | Both   | 1 to 4   | 0.3 | (0.2 to 0.4) | 12.8 | (1.4 to 57.9)   | 0.2 | (0.0 to 0.7) |
| Solomon Islands | Both   | 5 to 9   | 0.9 | (0.6 to 1.4) | 18.6 | (3.6 to 53.4)   | 0.2 | (0.0 to 0.7) |
| Solomon Islands | Both   | 10 to 14 | 1.9 | (1.3 to 2.7) | 14.9 | (4.4 to 39.5)   | 0.2 | (0.1 to 0.5) |
| Solomon Islands | Both   | 15 to 19 | 3.2 | (2.1 to 4.4) | 31.4 | (10.6 to 68.6)  | 0.4 | (0.1 to 1.0) |
| Tonga           | Male   | 1 to 4   | 0.3 | (0.2 to 0.5) | 25.3 | (3.9 to 95.0)   | 0.3 | (0.0 to 1.1) |
| Tonga           | Male   | 5 to 9   | 1   | (0.5 to 1.6) | 25.9 | (7.3 to 66.3)   | 0.3 | (0.1 to 0.8) |
| Tonga           | Male   | 10 to 14 | 2   | (1.2 to 3.2) | 7.1  | (2.6 to 15.1)   | 0.1 | (0.0 to 0.2) |
| Tonga           | Male   | 15 to 19 | 3.4 | (2.1 to 5.6) | 33   | (11.5 to 74.7)  | 0.5 | (0.2 to 1.1) |
| Tonga           | Female | 1 to 4   | 0.2 | (0.1 to 0.4) | 13.2 | (2.2 to 55.6)   | 0.2 | (0.0 to 0.7) |
| Tonga           | Female | 5 to 9   | 0.7 | (0.3 to 1.1) | 4.7  | (1.2 to 14.5)   | 0.1 | (0.0 to 0.2) |
| Tonga           | Female | 10 to 14 | 1.5 | (0.8 to 2.3) | 11.5 | (3.2 to 36.3)   | 0.2 | (0.0 to 0.5) |
| Tonga           | Female | 15 to 19 | 2.6 | (1.5 to 4.1) | 5.2  | (1.9 to 12.6)   | 0.1 | (0.0 to 0.2) |
| Tonga           | Both   | 1 to 4   | 0.3 | (0.2 to 0.4) | 19.4 | (4.8 to 65.4)   | 0.2 | (0.1 to 0.8) |
| Tonga           | Both   | 5 to 9   | 0.8 | (0.5 to 1.2) | 15.7 | (5.4 to 38.3)   | 0.2 | (0.1 to 0.5) |



|            |        |          |     |              |      |                 |     |              |
|------------|--------|----------|-----|--------------|------|-----------------|-----|--------------|
| Tonga      | Both   | 10 to 14 | 1.8 | (1.2 to 2.4) | 9.2  | (4.1 to 24.4)   | 0.1 | (0.1 to 0.3) |
| Tonga      | Both   | 15 to 19 | 3   | (2.1 to 4.3) | 19.6 | (8.2 to 43.3)   | 0.3 | (0.1 to 0.6) |
| Vanuatu    | Male   | 1 to 4   | 0.3 | (0.1 to 0.5) | 41.1 | (7.5 to 119.0)  | 0.5 | (0.1 to 1.4) |
| Vanuatu    | Male   | 5 to 9   | 1   | (0.5 to 1.6) | 51.4 | (13.8 to 125.4) | 0.6 | (0.2 to 1.6) |
| Vanuatu    | Male   | 10 to 14 | 2   | (1.2 to 3.1) | 16.7 | (6.3 to 34.9)   | 0.2 | (0.1 to 0.5) |
| Vanuatu    | Male   | 15 to 19 | 3.5 | (2.0 to 5.3) | 59.5 | (20.9 to 127.8) | 0.9 | (0.3 to 1.8) |
| Vanuatu    | Female | 1 to 4   | 0.2 | (0.1 to 0.3) | 16.6 | (2.2 to 74.9)   | 0.2 | (0.0 to 0.9) |
| Vanuatu    | Female | 5 to 9   | 0.7 | (0.3 to 1.1) | 6.6  | (1.6 to 21.9)   | 0.1 | (0.0 to 0.3) |
| Vanuatu    | Female | 10 to 14 | 1.4 | (0.8 to 2.3) | 19.7 | (4.9 to 58.3)   | 0.3 | (0.1 to 0.8) |
| Vanuatu    | Female | 15 to 19 | 2.6 | (1.5 to 4.1) | 10   | (3.8 to 24.1)   | 0.1 | (0.0 to 0.3) |
| Vanuatu    | Both   | 1 to 4   | 0.2 | (0.2 to 0.4) | 29.2 | (7.0 to 88.0)   | 0.3 | (0.1 to 1.0) |
| Vanuatu    | Both   | 5 to 9   | 0.8 | (0.5 to 1.2) | 29.8 | (8.9 to 71.0)   | 0.4 | (0.1 to 0.9) |
| Vanuatu    | Both   | 10 to 14 | 1.8 | (1.2 to 2.5) | 18.2 | (7.2 to 39.5)   | 0.2 | (0.1 to 0.5) |
| Vanuatu    | Both   | 15 to 19 | 3   | (2.1 to 4.2) | 35.6 | (14.3 to 72.6)  | 0.5 | (0.2 to 1.0) |
| Armenia    | Male   | 1 to 4   | 0.3 | (0.2 to 0.5) | 0.7  | (0.1 to 2.0)    | 0   | (0.0 to 0.0) |
| Armenia    | Male   | 5 to 9   | 0.9 | (0.5 to 1.6) | 6.7  | (3.2 to 10.8)   | 0.1 | (0.0 to 0.1) |
| Armenia    | Male   | 10 to 14 | 1.8 | (1.0 to 2.7) | 20.6 | (13.3 to 30.1)  | 0.3 | (0.2 to 0.4) |
| Armenia    | Male   | 15 to 19 | 2.7 | (1.5 to 4.3) | 54.5 | (22.3 to 93.0)  | 0.8 | (0.3 to 1.3) |
| Armenia    | Female | 1 to 4   | 0.3 | (0.2 to 0.5) | 7.1  | (3.4 to 13.2)   | 0.1 | (0.0 to 0.2) |
| Armenia    | Female | 5 to 9   | 0.9 | (0.5 to 1.4) | 9.8  | (2.4 to 16.0)   | 0.1 | (0.0 to 0.2) |
| Armenia    | Female | 10 to 14 | 1.7 | (1.0 to 2.6) | 6.1  | (2.7 to 10.4)   | 0.1 | (0.0 to 0.1) |
| Armenia    | Female | 15 to 19 | 2.7 | (1.4 to 4.3) | 33.1 | (16.1 to 50.1)  | 0.5 | (0.2 to 0.7) |
| Armenia    | Both   | 1 to 4   | 0.3 | (0.2 to 0.4) | 3.7  | (1.7 to 6.6)    | 0   | (0.0 to 0.1) |
| Armenia    | Both   | 5 to 9   | 0.9 | (0.6 to 1.3) | 8    | (4.3 to 11.5)   | 0.1 | (0.1 to 0.1) |
| Armenia    | Both   | 10 to 14 | 1.8 | (1.2 to 2.4) | 14.4 | (9.8 to 20.4)   | 0.2 | (0.1 to 0.3) |
| Armenia    | Both   | 15 to 19 | 2.7 | (1.8 to 3.8) | 45   | (22.6 to 68.1)  | 0.6 | (0.3 to 1.0) |
| Azerbaijan | Male   | 1 to 4   | 0.3 | (0.2 to 0.6) | 0.2  | (0.1 to 0.5)    | 0   | (0.0 to 0.0) |
| Azerbaijan | Male   | 5 to 9   | 0.9 | (0.5 to 1.7) | 1    | (0.5 to 1.7)    | 0   | (0.0 to 0.0) |
| Azerbaijan | Male   | 10 to 14 | 1.7 | (1.0 to 2.7) | 1.2  | (0.7 to 2.0)    | 0   | (0.0 to 0.0) |
| Azerbaijan | Male   | 15 to 19 | 2.6 | (1.5 to 4.2) | 6    | (2.5 to 13.3)   | 0.1 | (0.0 to 0.2) |
| Azerbaijan | Female | 1 to 4   | 0.3 | (0.1 to 0.4) | 1.5  | (0.3 to 5.1)    | 0   | (0.0 to 0.1) |
| Azerbaijan | Female | 5 to 9   | 0.8 | (0.4 to 1.3) | 2.1  | (0.8 to 4.1)    | 0   | (0.0 to 0.0) |
| Azerbaijan | Female | 10 to 14 | 1.6 | (0.9 to 2.3) | 1.2  | (0.6 to 2.2)    | 0   | (0.0 to 0.0) |

|            |        |          |     |              |      |                 |     |              |
|------------|--------|----------|-----|--------------|------|-----------------|-----|--------------|
| Azerbaijan | Female | 15 to 19 | 2.5 | (1.4 to 3.8) | 14.2 | (6.0 to 32.9)   | 0.2 | (0.1 to 0.5) |
| Azerbaijan | Both   | 1 to 4   | 0.3 | (0.2 to 0.4) | 0.8  | (0.2 to 2.5)    | 0   | (0.0 to 0.0) |
| Azerbaijan | Both   | 5 to 9   | 0.9 | (0.5 to 1.3) | 1.5  | (0.8 to 2.5)    | 0   | (0.0 to 0.0) |
| Azerbaijan | Both   | 10 to 14 | 1.6 | (1.1 to 2.3) | 1.2  | (0.7 to 1.8)    | 0   | (0.0 to 0.0) |
| Azerbaijan | Both   | 15 to 19 | 2.6 | (1.8 to 3.6) | 9.9  | (5.0 to 20.5)   | 0.1 | (0.1 to 0.3) |
| Georgia    | Male   | 1 to 4   | 0.3 | (0.2 to 0.5) | 10.4 | (4.4 to 20.6)   | 0.1 | (0.1 to 0.2) |
| Georgia    | Male   | 5 to 9   | 0.9 | (0.5 to 1.5) | 21.7 | (9.9 to 47.4)   | 0.3 | (0.1 to 0.6) |
| Georgia    | Male   | 10 to 14 | 1.7 | (0.9 to 2.8) | 16.4 | (8.0 to 29.2)   | 0.2 | (0.1 to 0.4) |
| Georgia    | Male   | 15 to 19 | 2.6 | (1.4 to 4.3) | 55.2 | (28.1 to 106.8) | 0.8 | (0.4 to 1.5) |
| Georgia    | Female | 1 to 4   | 0.3 | (0.2 to 0.4) | 25.7 | (13.6 to 44.6)  | 0.3 | (0.2 to 0.5) |
| Georgia    | Female | 5 to 9   | 0.8 | (0.5 to 1.3) | 30   | (18.6 to 51.3)  | 0.4 | (0.2 to 0.6) |
| Georgia    | Female | 10 to 14 | 1.6 | (1.0 to 2.4) | 8    | (3.1 to 12.8)   | 0.1 | (0.0 to 0.2) |
| Georgia    | Female | 15 to 19 | 2.3 | (1.3 to 3.8) | 38.5 | (22.7 to 59.6)  | 0.5 | (0.3 to 0.9) |
| Georgia    | Both   | 1 to 4   | 0.3 | (0.2 to 0.4) | 17.7 | (10.1 to 29.0)  | 0.2 | (0.1 to 0.3) |
| Georgia    | Both   | 5 to 9   | 0.9 | (0.6 to 1.2) | 25.6 | (16.3 to 42.6)  | 0.3 | (0.2 to 0.5) |
| Georgia    | Both   | 10 to 14 | 1.6 | (1.1 to 2.2) | 12.5 | (7.9 to 18.8)   | 0.2 | (0.1 to 0.3) |
| Georgia    | Both   | 15 to 19 | 2.5 | (1.7 to 3.5) | 47.1 | (31.2 to 74.2)  | 0.7 | (0.4 to 1.1) |
| Kazakhstan | Male   | 1 to 4   | 0.3 | (0.2 to 0.6) | 5.2  | (2.1 to 11.3)   | 0.1 | (0.0 to 0.1) |
| Kazakhstan | Male   | 5 to 9   | 1   | (0.5 to 1.7) | 9.8  | (5.7 to 15.9)   | 0.1 | (0.1 to 0.2) |
| Kazakhstan | Male   | 10 to 14 | 1.9 | (1.1 to 3.2) | 7.7  | (4.3 to 12.8)   | 0.1 | (0.1 to 0.2) |
| Kazakhstan | Male   | 15 to 19 | 2.9 | (1.5 to 5.1) | 34.2 | (19.9 to 57.0)  | 0.5 | (0.3 to 0.8) |
| Kazakhstan | Female | 1 to 4   | 0.3 | (0.1 to 0.5) | 9.6  | (4.0 to 17.4)   | 0.1 | (0.0 to 0.2) |
| Kazakhstan | Female | 5 to 9   | 0.9 | (0.5 to 1.4) | 8.2  | (3.1 to 13.1)   | 0.1 | (0.0 to 0.2) |
| Kazakhstan | Female | 10 to 14 | 1.7 | (1.1 to 2.7) | 9.3  | (5.3 to 17.0)   | 0.1 | (0.1 to 0.2) |
| Kazakhstan | Female | 15 to 19 | 2.7 | (1.6 to 4.3) | 23.2 | (11.0 to 36.1)  | 0.3 | (0.2 to 0.5) |
| Kazakhstan | Both   | 1 to 4   | 0.3 | (0.2 to 0.5) | 7.3  | (4.1 to 13.2)   | 0.1 | (0.0 to 0.2) |
| Kazakhstan | Both   | 5 to 9   | 0.9 | (0.6 to 1.3) | 9.1  | (5.4 to 12.7)   | 0.1 | (0.1 to 0.2) |
| Kazakhstan | Both   | 10 to 14 | 1.8 | (1.3 to 2.5) | 8.5  | (5.8 to 13.4)   | 0.1 | (0.1 to 0.2) |
| Kazakhstan | Both   | 15 to 19 | 2.8 | (1.9 to 4.1) | 28.8 | (18.1 to 42.8)  | 0.4 | (0.3 to 0.6) |
| Kyrgyzstan | Male   | 1 to 4   | 0.3 | (0.2 to 0.6) | 3.6  | (1.6 to 6.7)    | 0   | (0.0 to 0.1) |
| Kyrgyzstan | Male   | 5 to 9   | 1   | (0.6 to 1.6) | 4.6  | (1.9 to 7.8)    | 0.1 | (0.0 to 0.1) |
| Kyrgyzstan | Male   | 10 to 14 | 1.9 | (1.1 to 2.9) | 10.6 | (6.1 to 16.9)   | 0.1 | (0.1 to 0.2) |
| Kyrgyzstan | Male   | 15 to 19 | 3   | (1.6 to 4.7) | 23.2 | (11.5 to 38.1)  | 0.3 | (0.2 to 0.5) |

|              |        |          |     |              |      |                |     |              |
|--------------|--------|----------|-----|--------------|------|----------------|-----|--------------|
| Kyrgyzstan   | Female | 1 to 4   | 0.3 | (0.1 to 0.5) | 5.3  | (1.6 to 9.6)   | 0.1 | (0.0 to 0.1) |
| Kyrgyzstan   | Female | 5 to 9   | 0.9 | (0.5 to 1.4) | 4.8  | (1.8 to 7.8)   | 0.1 | (0.0 to 0.1) |
| Kyrgyzstan   | Female | 10 to 14 | 1.8 | (1.1 to 2.7) | 2.6  | (1.1 to 4.2)   | 0   | (0.0 to 0.1) |
| Kyrgyzstan   | Female | 15 to 19 | 2.7 | (1.5 to 4.2) | 16.4 | (9.1 to 25.5)  | 0.2 | (0.1 to 0.4) |
| Kyrgyzstan   | Both   | 1 to 4   | 0.3 | (0.2 to 0.5) | 4.4  | (2.0 to 7.5)   | 0.1 | (0.0 to 0.1) |
| Kyrgyzstan   | Both   | 5 to 9   | 1   | (0.7 to 1.4) | 4.7  | (2.1 to 7.1)   | 0.1 | (0.0 to 0.1) |
| Kyrgyzstan   | Both   | 10 to 14 | 1.8 | (1.3 to 2.6) | 6.7  | (4.0 to 10.0)  | 0.1 | (0.1 to 0.1) |
| Kyrgyzstan   | Both   | 15 to 19 | 2.8 | (1.9 to 3.9) | 19.8 | (12.4 to 28.3) | 0.3 | (0.2 to 0.4) |
| Mongolia     | Male   | 1 to 4   | 0.3 | (0.2 to 0.5) | 19   | (4.5 to 50.3)  | 0.2 | (0.1 to 0.6) |
| Mongolia     | Male   | 5 to 9   | 0.9 | (0.4 to 1.5) | 12.8 | (5.3 to 26.7)  | 0.2 | (0.1 to 0.3) |
| Mongolia     | Male   | 10 to 14 | 1.6 | (0.9 to 2.6) | 2.8  | (1.1 to 5.7)   | 0   | (0.0 to 0.1) |
| Mongolia     | Male   | 15 to 19 | 2.5 | (1.4 to 4.0) | 6    | (2.6 to 11.8)  | 0.1 | (0.0 to 0.2) |
| Mongolia     | Female | 1 to 4   | 0.3 | (0.1 to 0.4) | 27.9 | (9.9 to 61.3)  | 0.3 | (0.1 to 0.7) |
| Mongolia     | Female | 5 to 9   | 0.8 | (0.4 to 1.3) | 7.4  | (3.0 to 14.9)  | 0.1 | (0.0 to 0.2) |
| Mongolia     | Female | 10 to 14 | 1.5 | (0.9 to 2.3) | 3.5  | (1.2 to 7.5)   | 0   | (0.0 to 0.1) |
| Mongolia     | Female | 15 to 19 | 2.4 | (1.3 to 3.6) | 35.2 | (15.8 to 77.5) | 0.5 | (0.2 to 1.1) |
| Mongolia     | Both   | 1 to 4   | 0.3 | (0.2 to 0.4) | 23.4 | (9.8 to 48.9)  | 0.3 | (0.1 to 0.6) |
| Mongolia     | Both   | 5 to 9   | 0.8 | (0.5 to 1.2) | 10.1 | (5.5 to 17.1)  | 0.1 | (0.1 to 0.2) |
| Mongolia     | Both   | 10 to 14 | 1.6 | (1.1 to 2.2) | 3.2  | (1.3 to 5.7)   | 0   | (0.0 to 0.1) |
| Mongolia     | Both   | 15 to 19 | 2.4 | (1.7 to 3.4) | 20.5 | (10.7 to 41.7) | 0.3 | (0.2 to 0.6) |
| Tajikistan   | Male   | 1 to 4   | 0.3 | (0.1 to 0.7) | 2.7  | (1.0 to 5.7)   | 0   | (0.0 to 0.1) |
| Tajikistan   | Male   | 5 to 9   | 1   | (0.5 to 1.8) | 4.4  | (1.6 to 8.3)   | 0.1 | (0.0 to 0.1) |
| Tajikistan   | Male   | 10 to 14 | 1.9 | (1.1 to 3.0) | 4.8  | (2.0 to 8.8)   | 0.1 | (0.0 to 0.1) |
| Tajikistan   | Male   | 15 to 19 | 2.8 | (1.5 to 4.7) | 10.8 | (3.3 to 22.8)  | 0.1 | (0.0 to 0.3) |
| Tajikistan   | Female | 1 to 4   | 0.3 | (0.1 to 0.4) | 4.8  | (1.0 to 9.5)   | 0.1 | (0.0 to 0.1) |
| Tajikistan   | Female | 5 to 9   | 0.8 | (0.4 to 1.4) | 4.6  | (1.4 to 8.8)   | 0.1 | (0.0 to 0.1) |
| Tajikistan   | Female | 10 to 14 | 1.6 | (1.0 to 2.4) | 2.1  | (0.8 to 3.7)   | 0   | (0.0 to 0.0) |
| Tajikistan   | Female | 15 to 19 | 2.5 | (1.5 to 3.8) | 11.3 | (4.7 to 20.5)  | 0.2 | (0.1 to 0.3) |
| Tajikistan   | Both   | 1 to 4   | 0.3 | (0.2 to 0.5) | 3.7  | (1.3 to 6.8)   | 0   | (0.0 to 0.1) |
| Tajikistan   | Both   | 5 to 9   | 0.9 | (0.6 to 1.3) | 4.5  | (1.9 to 7.5)   | 0.1 | (0.0 to 0.1) |
| Tajikistan   | Both   | 10 to 14 | 1.7 | (1.2 to 2.4) | 3.5  | (1.8 to 5.7)   | 0   | (0.0 to 0.1) |
| Tajikistan   | Both   | 15 to 19 | 2.6 | (1.8 to 3.8) | 11   | (5.1 to 18.6)  | 0.2 | (0.1 to 0.3) |
| Turkmenistan | Male   | 1 to 4   | 0.2 | (0.1 to 0.4) | 6.9  | (1.5 to 19.4)  | 0.1 | (0.0 to 0.2) |

|              |        |          |      |               |      |                 |     |              |
|--------------|--------|----------|------|---------------|------|-----------------|-----|--------------|
| Turkmenistan | Male   | 5 to 9   | 0.7  | (0.4 to 1.2)  | 3.9  | (1.5 to 8.3)    | 0   | (0.0 to 0.1) |
| Turkmenistan | Male   | 10 to 14 | 1.3  | (0.7 to 2.2)  | 3.3  | (1.6 to 5.9)    | 0   | (0.0 to 0.1) |
| Turkmenistan | Male   | 15 to 19 | 2.1  | (1.1 to 3.5)  | 7.1  | (3.1 to 14.3)   | 0.1 | (0.0 to 0.2) |
| Turkmenistan | Female | 1 to 4   | 0.2  | (0.1 to 0.4)  | 7.6  | (2.6 to 18.8)   | 0.1 | (0.0 to 0.2) |
| Turkmenistan | Female | 5 to 9   | 0.7  | (0.3 to 1.1)  | 4    | (1.2 to 9.0)    | 0   | (0.0 to 0.1) |
| Turkmenistan | Female | 10 to 14 | 1.3  | (0.7 to 2.0)  | 3    | (1.1 to 8.0)    | 0   | (0.0 to 0.1) |
| Turkmenistan | Female | 15 to 19 | 2    | (1.2 to 3.2)  | 6.7  | (2.7 to 13.2)   | 0.1 | (0.0 to 0.2) |
| Turkmenistan | Both   | 1 to 4   | 0.2  | (0.1 to 0.4)  | 7.3  | (3.1 to 17.1)   | 0.1 | (0.0 to 0.2) |
| Turkmenistan | Both   | 5 to 9   | 0.7  | (0.4 to 1.0)  | 4    | (1.7 to 7.6)    | 0   | (0.0 to 0.1) |
| Turkmenistan | Both   | 10 to 14 | 1.3  | (0.9 to 1.8)  | 3.1  | (1.7 to 6.1)    | 0   | (0.0 to 0.1) |
| Turkmenistan | Both   | 15 to 19 | 2    | (1.4 to 2.9)  | 6.9  | (3.7 to 11.2)   | 0.1 | (0.0 to 0.2) |
| Uzbekistan   | Male   | 1 to 4   | 0.3  | (0.2 to 0.6)  | 4    | (1.9 to 7.8)    | 0   | (0.0 to 0.1) |
| Uzbekistan   | Male   | 5 to 9   | 1    | (0.5 to 1.7)  | 7.2  | (4.1 to 11.5)   | 0.1 | (0.0 to 0.1) |
| Uzbekistan   | Male   | 10 to 14 | 1.8  | (1.0 to 2.8)  | 6.7  | (3.6 to 11.0)   | 0.1 | (0.0 to 0.1) |
| Uzbekistan   | Male   | 15 to 19 | 2.7  | (1.5 to 4.4)  | 30.7 | (14.2 to 56.8)  | 0.4 | (0.2 to 0.8) |
| Uzbekistan   | Female | 1 to 4   | 0.3  | (0.1 to 0.4)  | 6    | (3.2 to 10.2)   | 0.1 | (0.0 to 0.1) |
| Uzbekistan   | Female | 5 to 9   | 0.8  | (0.3 to 1.3)  | 7.2  | (3.8 to 11.9)   | 0.1 | (0.0 to 0.1) |
| Uzbekistan   | Female | 10 to 14 | 1.6  | (0.8 to 2.4)  | 4.9  | (2.4 to 10.8)   | 0.1 | (0.0 to 0.1) |
| Uzbekistan   | Female | 15 to 19 | 2.6  | (1.5 to 4.0)  | 17.7 | (8.7 to 40.4)   | 0.3 | (0.1 to 0.6) |
| Uzbekistan   | Both   | 1 to 4   | 0.3  | (0.2 to 0.5)  | 5    | (2.9 to 7.9)    | 0.1 | (0.0 to 0.1) |
| Uzbekistan   | Both   | 5 to 9   | 0.9  | (0.5 to 1.3)  | 7.2  | (4.8 to 10.2)   | 0.1 | (0.1 to 0.1) |
| Uzbekistan   | Both   | 10 to 14 | 1.7  | (1.1 to 2.3)  | 5.8  | (3.7 to 8.9)    | 0.1 | (0.0 to 0.1) |
| Uzbekistan   | Both   | 15 to 19 | 2.6  | (1.7 to 3.8)  | 24.4 | (14.2 to 38.7)  | 0.3 | (0.2 to 0.6) |
| Albania      | Male   | 1 to 4   | 1.3  | (0.8 to 2.0)  | 35.4 | (12.5 to 84.7)  | 0.4 | (0.1 to 1.0) |
| Albania      | Male   | 5 to 9   | 3.9  | (2.4 to 5.9)  | 12.7 | (5.9 to 25.1)   | 0.2 | (0.1 to 0.3) |
| Albania      | Male   | 10 to 14 | 7.4  | (4.6 to 10.9) | 11.1 | (5.8 to 20.2)   | 0.1 | (0.1 to 0.3) |
| Albania      | Male   | 15 to 19 | 11.2 | (6.7 to 16.9) | 30.9 | (17.3 to 51.5)  | 0.4 | (0.2 to 0.7) |
| Albania      | Female | 1 to 4   | 0.8  | (0.5 to 1.2)  | 54.9 | (17.2 to 124.0) | 0.6 | (0.2 to 1.5) |
| Albania      | Female | 5 to 9   | 2.4  | (1.4 to 3.5)  | 17.2 | (7.1 to 35.0)   | 0.2 | (0.1 to 0.4) |
| Albania      | Female | 10 to 14 | 4.5  | (2.9 to 6.7)  | 17.4 | (8.9 to 30.4)   | 0.2 | (0.1 to 0.4) |
| Albania      | Female | 15 to 19 | 7    | (4.1 to 10.7) | 22   | (11.8 to 43.0)  | 0.3 | (0.2 to 0.6) |
| Albania      | Both   | 1 to 4   | 1.1  | (0.7 to 1.4)  | 44.8 | (18.1 to 95.0)  | 0.5 | (0.2 to 1.1) |
| Albania      | Both   | 5 to 9   | 3.2  | (2.2 to 4.4)  | 14.8 | (7.5 to 28.0)   | 0.2 | (0.1 to 0.3) |

|                        |        |          |      |               |      |                |     |              |
|------------------------|--------|----------|------|---------------|------|----------------|-----|--------------|
| Albania                | Both   | 10 to 14 | 6    | (4.3 to 8.1)  | 14.1 | (8.2 to 22.9)  | 0.2 | (0.1 to 0.3) |
| Albania                | Both   | 15 to 19 | 9.1  | (6.2 to 12.5) | 26.5 | (17.0 to 40.5) | 0.4 | (0.2 to 0.6) |
| Bosnia and Herzegovina | Male   | 1 to 4   | 1.3  | (0.8 to 2.0)  | 6.3  | (1.9 to 14.6)  | 0.1 | (0.0 to 0.2) |
| Bosnia and Herzegovina | Male   | 5 to 9   | 3.9  | (2.4 to 5.8)  | 3.1  | (0.8 to 7.6)   | 0   | (0.0 to 0.1) |
| Bosnia and Herzegovina | Male   | 10 to 14 | 7.5  | (4.6 to 10.3) | 6.3  | (3.1 to 11.2)  | 0.1 | (0.0 to 0.1) |
| Bosnia and Herzegovina | Male   | 15 to 19 | 11.4 | (6.9 to 15.9) | 16.7 | (3.6 to 39.6)  | 0.2 | (0.0 to 0.5) |
| Bosnia and Herzegovina | Female | 1 to 4   | 0.8  | (0.5 to 1.2)  | 6.3  | (0.8 to 14.2)  | 0.1 | (0.0 to 0.2) |
| Bosnia and Herzegovina | Female | 5 to 9   | 2.4  | (1.5 to 3.5)  | 3    | (0.4 to 6.8)   | 0   | (0.0 to 0.1) |
| Bosnia and Herzegovina | Female | 10 to 14 | 4.8  | (3.2 to 6.8)  | 6.5  | (1.7 to 13.3)  | 0.1 | (0.0 to 0.2) |
| Bosnia and Herzegovina | Female | 15 to 19 | 7.6  | (5.1 to 10.5) | 21.8 | (4.8 to 42.5)  | 0.3 | (0.1 to 0.6) |
| Bosnia and Herzegovina | Both   | 1 to 4   | 1.1  | (0.8 to 1.5)  | 6.3  | (1.7 to 13.5)  | 0.1 | (0.0 to 0.2) |
| Bosnia and Herzegovina | Both   | 5 to 9   | 3.2  | (2.2 to 4.2)  | 3.1  | (0.7 to 6.3)   | 0   | (0.0 to 0.1) |
| Bosnia and Herzegovina | Both   | 10 to 14 | 6.2  | (4.5 to 7.8)  | 6.4  | (3.2 to 10.3)  | 0.1 | (0.0 to 0.1) |
| Bosnia and Herzegovina | Both   | 15 to 19 | 9.6  | (7.1 to 12.2) | 19.2 | (5.2 to 36.9)  | 0.3 | (0.1 to 0.5) |
| Bulgaria               | Male   | 1 to 4   | 1.4  | (0.8 to 2.0)  | 8.1  | (3.7 to 15.0)  | 0.1 | (0.0 to 0.2) |
| Bulgaria               | Male   | 5 to 9   | 4    | (2.7 to 5.7)  | 5.5  | (2.9 to 9.2)   | 0.1 | (0.0 to 0.1) |
| Bulgaria               | Male   | 10 to 14 | 7.7  | (5.2 to 10.6) | 8    | (4.9 to 12.4)  | 0.1 | (0.0 to 0.2) |
| Bulgaria               | Male   | 15 to 19 | 11.7 | (7.7 to 16.8) | 17.9 | (9.9 to 29.2)  | 0.2 | (0.1 to 0.4) |
| Bulgaria               | Female | 1 to 4   | 0.8  | (0.5 to 1.2)  | 6.8  | (3.3 to 12.0)  | 0.1 | (0.0 to 0.1) |
| Bulgaria               | Female | 5 to 9   | 2.5  | (1.5 to 3.6)  | 3.3  | (1.5 to 5.5)   | 0   | (0.0 to 0.1) |
| Bulgaria               | Female | 10 to 14 | 4.9  | (3.1 to 6.9)  | 5.1  | (2.9 to 7.6)   | 0.1 | (0.0 to 0.1) |
| Bulgaria               | Female | 15 to 19 | 7.7  | (4.8 to 11.1) | 13.4 | (8.6 to 21.2)  | 0.2 | (0.1 to 0.3) |
| Bulgaria               | Both   | 1 to 4   | 1.1  | (0.8 to 1.5)  | 7.5  | (4.1 to 12.6)  | 0.1 | (0.0 to 0.1) |
| Bulgaria               | Both   | 5 to 9   | 3.3  | (2.4 to 4.3)  | 4.5  | (2.5 to 6.9)   | 0   | (0.0 to 0.1) |
| Bulgaria               | Both   | 10 to 14 | 6.3  | (4.8 to 8.1)  | 6.6  | (4.6 to 9.1)   | 0.1 | (0.0 to 0.1) |
| Bulgaria               | Both   | 15 to 19 | 9.8  | (7.2 to 12.7) | 15.7 | (10.6 to 22.4) | 0.2 | (0.1 to 0.3) |
| Croatia                | Male   | 1 to 4   | 1.4  | (0.7 to 2.0)  | 1.6  | (0.7 to 3.2)   | 0   | (0.0 to 0.0) |
| Croatia                | Male   | 5 to 9   | 4    | (2.4 to 5.7)  | 1.2  | (0.7 to 2.0)   | 0   | (0.0 to 0.0) |
| Croatia                | Male   | 10 to 14 | 7.8  | (5.2 to 10.8) | 2.3  | (1.5 to 3.3)   | 0   | (0.0 to 0.0) |
| Croatia                | Male   | 15 to 19 | 12   | (7.5 to 17.2) | 6.9  | (4.2 to 11.0)  | 0.1 | (0.0 to 0.1) |
| Croatia                | Female | 1 to 4   | 0.8  | (0.4 to 1.2)  | 0.9  | (0.4 to 1.6)   | 0   | (0.0 to 0.0) |
| Croatia                | Female | 5 to 9   | 2.4  | (1.4 to 3.6)  | 1.4  | (0.8 to 2.2)   | 0   | (0.0 to 0.0) |
| Croatia                | Female | 10 to 14 | 4.6  | (3.1 to 6.7)  | 1.5  | (0.8 to 2.2)   | 0   | (0.0 to 0.0) |

|                |        |          |      |               |      |                |     |              |
|----------------|--------|----------|------|---------------|------|----------------|-----|--------------|
| Croatia        | Female | 15 to 19 | 7    | (4.5 to 10.1) | 4    | (2.3 to 5.8)   | 0   | (0.0 to 0.1) |
| Croatia        | Both   | 1 to 4   | 1.1  | (0.7 to 1.4)  | 1.2  | (0.6 to 2.2)   | 0   | (0.0 to 0.0) |
| Croatia        | Both   | 5 to 9   | 3.2  | (2.3 to 4.2)  | 1.3  | (0.9 to 1.9)   | 0   | (0.0 to 0.0) |
| Croatia        | Both   | 10 to 14 | 6.2  | (4.7 to 8.0)  | 1.9  | (1.3 to 2.6)   | 0   | (0.0 to 0.0) |
| Croatia        | Both   | 15 to 19 | 9.6  | (7.0 to 12.7) | 5.5  | (3.8 to 7.8)   | 0.1 | (0.0 to 0.1) |
| Czech Republic | Male   | 1 to 4   | 1.3  | (0.9 to 1.9)  | 1.7  | (0.8 to 3.3)   | 0   | (0.0 to 0.0) |
| Czech Republic | Male   | 5 to 9   | 3.9  | (2.6 to 5.7)  | 1.6  | (1.0 to 2.4)   | 0   | (0.0 to 0.0) |
| Czech Republic | Male   | 10 to 14 | 7.5  | (5.1 to 10.8) | 2.1  | (1.4 to 3.1)   | 0   | (0.0 to 0.0) |
| Czech Republic | Male   | 15 to 19 | 11.5 | (7.3 to 16.7) | 6.6  | (4.4 to 9.9)   | 0.1 | (0.0 to 0.1) |
| Czech Republic | Female | 1 to 4   | 0.8  | (0.4 to 1.2)  | 1.6  | (0.7 to 2.7)   | 0   | (0.0 to 0.0) |
| Czech Republic | Female | 5 to 9   | 2.3  | (1.3 to 3.4)  | 2    | (1.2 to 3.1)   | 0   | (0.0 to 0.0) |
| Czech Republic | Female | 10 to 14 | 4.6  | (2.9 to 6.6)  | 2.5  | (1.6 to 3.7)   | 0   | (0.0 to 0.0) |
| Czech Republic | Female | 15 to 19 | 7.3  | (4.5 to 10.7) | 4.4  | (2.7 to 6.4)   | 0   | (0.0 to 0.1) |
| Czech Republic | Both   | 1 to 4   | 1.1  | (0.8 to 1.4)  | 1.7  | (0.9 to 2.8)   | 0   | (0.0 to 0.0) |
| Czech Republic | Both   | 5 to 9   | 3.1  | (2.3 to 4.4)  | 1.8  | (1.2 to 2.6)   | 0   | (0.0 to 0.0) |
| Czech Republic | Both   | 10 to 14 | 6.1  | (4.6 to 8.0)  | 2.3  | (1.7 to 3.1)   | 0   | (0.0 to 0.0) |
| Czech Republic | Both   | 15 to 19 | 9.5  | (6.9 to 12.5) | 5.5  | (4.0 to 7.5)   | 0.1 | (0.0 to 0.1) |
| Hungary        | Male   | 1 to 4   | 1.5  | (1.0 to 2.2)  | 3.2  | (1.1 to 6.7)   | 0   | (0.0 to 0.1) |
| Hungary        | Male   | 5 to 9   | 4.4  | (2.9 to 6.1)  | 2.6  | (1.2 to 4.6)   | 0   | (0.0 to 0.0) |
| Hungary        | Male   | 10 to 14 | 8.5  | (5.8 to 11.9) | 4.6  | (2.7 to 7.3)   | 0   | (0.0 to 0.1) |
| Hungary        | Male   | 15 to 19 | 13.2 | (8.9 to 18.8) | 8.2  | (4.5 to 12.6)  | 0.1 | (0.0 to 0.1) |
| Hungary        | Female | 1 to 4   | 1    | (0.6 to 1.5)  | 3.1  | (1.2 to 6.4)   | 0   | (0.0 to 0.1) |
| Hungary        | Female | 5 to 9   | 2.9  | (1.9 to 4.2)  | 3    | (1.5 to 4.6)   | 0   | (0.0 to 0.1) |
| Hungary        | Female | 10 to 14 | 5.6  | (3.9 to 8.0)  | 4.7  | (2.7 to 7.1)   | 0.1 | (0.0 to 0.1) |
| Hungary        | Female | 15 to 19 | 8.5  | (5.5 to 12.6) | 10.7 | (6.1 to 15.7)  | 0.1 | (0.1 to 0.2) |
| Hungary        | Both   | 1 to 4   | 1.3  | (0.9 to 1.6)  | 3.1  | (1.3 to 5.5)   | 0   | (0.0 to 0.1) |
| Hungary        | Both   | 5 to 9   | 3.7  | (2.7 to 4.7)  | 2.8  | (1.5 to 4.3)   | 0   | (0.0 to 0.0) |
| Hungary        | Both   | 10 to 14 | 7.1  | (5.4 to 8.9)  | 4.6  | (3.1 to 6.5)   | 0   | (0.0 to 0.1) |
| Hungary        | Both   | 15 to 19 | 10.9 | (8.1 to 14.2) | 9.4  | (5.9 to 12.8)  | 0.1 | (0.1 to 0.2) |
| Macedonia      | Male   | 1 to 4   | 1.4  | (0.9 to 1.9)  | 9    | (2.9 to 19.2)  | 0.1 | (0.0 to 0.2) |
| Macedonia      | Male   | 5 to 9   | 4.1  | (2.7 to 5.7)  | 7.7  | (3.6 to 14.1)  | 0.1 | (0.0 to 0.2) |
| Macedonia      | Male   | 10 to 14 | 7.7  | (5.3 to 10.7) | 3.4  | (1.6 to 6.2)   | 0   | (0.0 to 0.1) |
| Macedonia      | Male   | 15 to 19 | 11.9 | (7.7 to 17.0) | 29.1 | (13.6 to 50.9) | 0.4 | (0.2 to 0.7) |

|            |        |          |      |               |      |                 |     |              |
|------------|--------|----------|------|---------------|------|-----------------|-----|--------------|
| Macedonia  | Female | 1 to 4   | 0.8  | (0.5 to 1.2)  | 11   | (4.1 to 22.3)   | 0.1 | (0.0 to 0.3) |
| Macedonia  | Female | 5 to 9   | 2.4  | (1.5 to 3.5)  | 11.6 | (5.5 to 24.9)   | 0.1 | (0.1 to 0.3) |
| Macedonia  | Female | 10 to 14 | 4.7  | (3.1 to 6.7)  | 8.4  | (3.8 to 14.2)   | 0.1 | (0.0 to 0.2) |
| Macedonia  | Female | 15 to 19 | 7.4  | (4.7 to 10.7) | 25.8 | (13.7 to 39.4)  | 0.4 | (0.2 to 0.6) |
| Macedonia  | Both   | 1 to 4   | 1.1  | (0.8 to 1.5)  | 10   | (4.1 to 17.9)   | 0.1 | (0.0 to 0.2) |
| Macedonia  | Both   | 5 to 9   | 3.2  | (2.4 to 4.2)  | 9.6  | (5.1 to 18.4)   | 0.1 | (0.1 to 0.2) |
| Macedonia  | Both   | 10 to 14 | 6.3  | (4.8 to 8.1)  | 5.8  | (2.8 to 9.3)    | 0.1 | (0.0 to 0.1) |
| Macedonia  | Both   | 15 to 19 | 9.7  | (7.2 to 12.8) | 27.5 | (16.6 to 40.9)  | 0.4 | (0.2 to 0.6) |
| Montenegro | Male   | 1 to 4   | 1.4  | (0.8 to 2.1)  | 23.6 | (6.5 to 66.6)   | 0.3 | (0.1 to 0.8) |
| Montenegro | Male   | 5 to 9   | 4    | (2.6 to 5.9)  | 16.7 | (6.4 to 37.3)   | 0.2 | (0.1 to 0.5) |
| Montenegro | Male   | 10 to 14 | 7.6  | (5.3 to 10.5) | 14.8 | (6.5 to 29.4)   | 0.2 | (0.1 to 0.4) |
| Montenegro | Male   | 15 to 19 | 11.7 | (7.9 to 16.4) | 71.7 | (34.2 to 133.8) | 1   | (0.5 to 1.9) |
| Montenegro | Female | 1 to 4   | 0.8  | (0.5 to 1.1)  | 42.8 | (15.4 to 94.8)  | 0.5 | (0.2 to 1.1) |
| Montenegro | Female | 5 to 9   | 2.3  | (1.5 to 3.3)  | 29.5 | (9.0 to 67.0)   | 0.4 | (0.1 to 0.8) |
| Montenegro | Female | 10 to 14 | 4.7  | (3.1 to 6.5)  | 76.7 | (34.8 to 149.9) | 1   | (0.5 to 2.0) |
| Montenegro | Female | 15 to 19 | 7.4  | (4.6 to 10.6) | 33.7 | (8.5 to 64.7)   | 0.5 | (0.1 to 0.9) |
| Montenegro | Both   | 1 to 4   | 1.1  | (0.8 to 1.5)  | 32.8 | (12.9 to 72.3)  | 0.4 | (0.2 to 0.9) |
| Montenegro | Both   | 5 to 9   | 3.2  | (2.3 to 4.2)  | 22.8 | (9.6 to 47.9)   | 0.3 | (0.1 to 0.6) |
| Montenegro | Both   | 10 to 14 | 6.2  | (4.7 to 7.9)  | 44.7 | (23.8 to 79.6)  | 0.6 | (0.3 to 1.1) |
| Montenegro | Both   | 15 to 19 | 9.6  | (7.1 to 12.3) | 53.3 | (26.9 to 89.9)  | 0.7 | (0.4 to 1.3) |
| Poland     | Male   | 1 to 4   | 1.1  | (0.7 to 1.6)  | 2.9  | (1.3 to 5.4)    | 0   | (0.0 to 0.1) |
| Poland     | Male   | 5 to 9   | 3.2  | (2.1 to 4.7)  | 2.5  | (1.4 to 3.9)    | 0   | (0.0 to 0.0) |
| Poland     | Male   | 10 to 14 | 6.2  | (4.1 to 8.9)  | 3.7  | (2.3 to 5.8)    | 0   | (0.0 to 0.1) |
| Poland     | Male   | 15 to 19 | 9.7  | (5.8 to 13.8) | 8.8  | (5.0 to 13.4)   | 0.1 | (0.1 to 0.2) |
| Poland     | Female | 1 to 4   | 0.6  | (0.4 to 0.9)  | 2.9  | (1.2 to 5.4)    | 0   | (0.0 to 0.1) |
| Poland     | Female | 5 to 9   | 1.9  | (1.1 to 2.7)  | 3    | (1.6 to 4.8)    | 0   | (0.0 to 0.1) |
| Poland     | Female | 10 to 14 | 3.7  | (2.2 to 5.2)  | 4.5  | (2.7 to 6.8)    | 0.1 | (0.0 to 0.1) |
| Poland     | Female | 15 to 19 | 5.6  | (3.3 to 8.6)  | 7.4  | (4.1 to 11.0)   | 0.1 | (0.0 to 0.1) |
| Poland     | Both   | 1 to 4   | 0.9  | (0.6 to 1.2)  | 2.9  | (1.5 to 4.9)    | 0   | (0.0 to 0.1) |
| Poland     | Both   | 5 to 9   | 2.6  | (1.8 to 3.5)  | 2.8  | (1.7 to 4.0)    | 0   | (0.0 to 0.0) |
| Poland     | Both   | 10 to 14 | 5    | (3.5 to 6.4)  | 4.1  | (2.9 to 5.6)    | 0   | (0.0 to 0.1) |
| Poland     | Both   | 15 to 19 | 7.7  | (5.3 to 10.0) | 8.1  | (5.2 to 11.1)   | 0.1 | (0.1 to 0.1) |
| Romania    | Male   | 1 to 4   | 1.4  | (0.9 to 2.3)  | 0.8  | (0.4 to 1.6)    | 0   | (0.0 to 0.0) |

|          |        |          |      |               |     |               |     |              |
|----------|--------|----------|------|---------------|-----|---------------|-----|--------------|
| Romania  | Male   | 5 to 9   | 4.1  | (2.7 to 6.3)  | 1.6 | (0.8 to 2.8)  | 0   | (0.0 to 0.0) |
| Romania  | Male   | 10 to 14 | 7.9  | (5.3 to 11.7) | 2.8 | (1.7 to 4.2)  | 0   | (0.0 to 0.0) |
| Romania  | Male   | 15 to 19 | 12.1 | (7.5 to 18.0) | 4.9 | (2.4 to 8.0)  | 0   | (0.0 to 0.1) |
| Romania  | Female | 1 to 4   | 0.8  | (0.5 to 1.2)  | 0.8 | (0.2 to 1.7)  | 0   | (0.0 to 0.0) |
| Romania  | Female | 5 to 9   | 2.6  | (1.5 to 3.9)  | 1.3 | (0.6 to 2.2)  | 0   | (0.0 to 0.0) |
| Romania  | Female | 10 to 14 | 5    | (3.1 to 7.3)  | 1.9 | (1.0 to 2.9)  | 0   | (0.0 to 0.0) |
| Romania  | Female | 15 to 19 | 7.5  | (4.6 to 11.4) | 3.7 | (1.9 to 5.8)  | 0   | (0.0 to 0.1) |
| Romania  | Both   | 1 to 4   | 1.1  | (0.8 to 1.6)  | 0.8 | (0.3 to 1.5)  | 0   | (0.0 to 0.0) |
| Romania  | Both   | 5 to 9   | 3.4  | (2.4 to 4.7)  | 1.5 | (0.8 to 2.3)  | 0   | (0.0 to 0.0) |
| Romania  | Both   | 10 to 14 | 6.5  | (4.7 to 8.7)  | 2.3 | (1.4 to 3.4)  | 0   | (0.0 to 0.0) |
| Romania  | Both   | 15 to 19 | 9.9  | (6.9 to 13.1) | 4.3 | (2.3 to 6.3)  | 0   | (0.0 to 0.1) |
| Serbia   | Male   | 1 to 4   | 1.4  | (1.0 to 2.0)  | 1.9 | (0.9 to 3.3)  | 0   | (0.0 to 0.0) |
| Serbia   | Male   | 5 to 9   | 4.2  | (2.8 to 6.0)  | 2.6 | (1.7 to 4.2)  | 0   | (0.0 to 0.0) |
| Serbia   | Male   | 10 to 14 | 7.9  | (5.4 to 11.4) | 2.7 | (1.7 to 4.0)  | 0   | (0.0 to 0.0) |
| Serbia   | Male   | 15 to 19 | 12.2 | (7.5 to 17.8) | 8.5 | (5.0 to 12.6) | 0.1 | (0.0 to 0.2) |
| Serbia   | Female | 1 to 4   | 0.8  | (0.5 to 1.2)  | 1.4 | (0.5 to 2.5)  | 0   | (0.0 to 0.0) |
| Serbia   | Female | 5 to 9   | 2.5  | (1.6 to 3.5)  | 1.4 | (0.9 to 2.0)  | 0   | (0.0 to 0.0) |
| Serbia   | Female | 10 to 14 | 4.8  | (3.3 to 6.7)  | 1.8 | (1.1 to 2.6)  | 0   | (0.0 to 0.0) |
| Serbia   | Female | 15 to 19 | 7.3  | (4.7 to 10.9) | 4.7 | (2.7 to 7.0)  | 0.1 | (0.0 to 0.1) |
| Serbia   | Both   | 1 to 4   | 1.1  | (0.8 to 1.5)  | 1.7 | (0.8 to 2.7)  | 0   | (0.0 to 0.0) |
| Serbia   | Both   | 5 to 9   | 3.4  | (2.5 to 4.3)  | 2.1 | (1.5 to 2.8)  | 0   | (0.0 to 0.0) |
| Serbia   | Both   | 10 to 14 | 6.4  | (4.9 to 8.5)  | 2.3 | (1.5 to 3.1)  | 0   | (0.0 to 0.0) |
| Serbia   | Both   | 15 to 19 | 9.8  | (7.2 to 13.4) | 6.6 | (4.3 to 9.1)  | 0.1 | (0.0 to 0.1) |
| Slovakia | Male   | 1 to 4   | 1.4  | (0.8 to 2.0)  | 1.3 | (0.5 to 2.9)  | 0   | (0.0 to 0.0) |
| Slovakia | Male   | 5 to 9   | 4    | (2.5 to 5.5)  | 4.2 | (2.1 to 8.5)  | 0   | (0.0 to 0.1) |
| Slovakia | Male   | 10 to 14 | 7.7  | (5.1 to 10.5) | 3.2 | (2.1 to 4.8)  | 0   | (0.0 to 0.0) |
| Slovakia | Male   | 15 to 19 | 11.8 | (7.6 to 16.8) | 6.2 | (3.9 to 9.7)  | 0.1 | (0.0 to 0.1) |
| Slovakia | Female | 1 to 4   | 0.7  | (0.4 to 1.0)  | 1.7 | (0.5 to 3.4)  | 0   | (0.0 to 0.0) |
| Slovakia | Female | 5 to 9   | 2.3  | (1.3 to 3.3)  | 1.9 | (1.0 to 3.1)  | 0   | (0.0 to 0.0) |
| Slovakia | Female | 10 to 14 | 4.6  | (3.0 to 6.7)  | 1.9 | (1.2 to 2.8)  | 0   | (0.0 to 0.0) |
| Slovakia | Female | 15 to 19 | 7.2  | (4.7 to 10.3) | 3.6 | (2.1 to 5.4)  | 0   | (0.0 to 0.1) |
| Slovakia | Both   | 1 to 4   | 1    | (0.7 to 1.4)  | 1.5 | (0.6 to 2.7)  | 0   | (0.0 to 0.0) |
| Slovakia | Both   | 5 to 9   | 3.2  | (2.2 to 4.2)  | 3   | (1.8 to 5.5)  | 0   | (0.0 to 0.1) |



|          |        |          |      |                |     |               |     |              |
|----------|--------|----------|------|----------------|-----|---------------|-----|--------------|
| Slovakia | Both   | 10 to 14 | 6.1  | (4.4 to 7.9)   | 2.6 | (1.8 to 3.6)  | 0   | (0.0 to 0.0) |
| Slovakia | Both   | 15 to 19 | 9.5  | (6.9 to 12.5)  | 4.9 | (3.4 to 7.1)  | 0   | (0.0 to 0.1) |
| Slovenia | Male   | 1 to 4   | 1.3  | (0.8 to 1.8)   | 1.1 | (0.3 to 2.4)  | 0   | (0.0 to 0.0) |
| Slovenia | Male   | 5 to 9   | 3.8  | (2.3 to 5.3)   | 1.7 | (1.0 to 2.7)  | 0   | (0.0 to 0.0) |
| Slovenia | Male   | 10 to 14 | 7.4  | (4.8 to 10.3)  | 1.8 | (1.0 to 2.7)  | 0   | (0.0 to 0.0) |
| Slovenia | Male   | 15 to 19 | 11.5 | (7.4 to 16.9)  | 4.7 | (3.0 to 7.0)  | 0   | (0.0 to 0.1) |
| Slovenia | Female | 1 to 4   | 0.8  | (0.5 to 1.3)   | 3.9 | (1.7 to 8.0)  | 0   | (0.0 to 0.1) |
| Slovenia | Female | 5 to 9   | 2.6  | (1.6 to 3.8)   | 1.1 | (0.5 to 1.8)  | 0   | (0.0 to 0.0) |
| Slovenia | Female | 10 to 14 | 4.8  | (3.2 to 6.8)   | 1.3 | (0.9 to 2.0)  | 0   | (0.0 to 0.0) |
| Slovenia | Female | 15 to 19 | 7.3  | (4.4 to 10.5)  | 2.3 | (1.3 to 3.3)  | 0   | (0.0 to 0.0) |
| Slovenia | Both   | 1 to 4   | 1.1  | (0.7 to 1.4)   | 2.5 | (1.1 to 4.9)  | 0   | (0.0 to 0.1) |
| Slovenia | Both   | 5 to 9   | 3.2  | (2.3 to 4.2)   | 1.4 | (1.0 to 2.0)  | 0   | (0.0 to 0.0) |
| Slovenia | Both   | 10 to 14 | 6.1  | (4.5 to 8.0)   | 1.6 | (1.0 to 2.2)  | 0   | (0.0 to 0.0) |
| Slovenia | Both   | 15 to 19 | 9.5  | (6.7 to 12.8)  | 3.5 | (2.4 to 4.8)  | 0   | (0.0 to 0.0) |
| Belarus  | Male   | 1 to 4   | 4.2  | (2.8 to 5.7)   | 0.7 | (0.4 to 1.2)  | 0   | (0.0 to 0.0) |
| Belarus  | Male   | 5 to 9   | 11.5 | (8.3 to 15.7)  | 2.5 | (1.6 to 3.7)  | 0   | (0.0 to 0.0) |
| Belarus  | Male   | 10 to 14 | 20.5 | (14.8 to 27.2) | 3.8 | (2.3 to 5.8)  | 0   | (0.0 to 0.0) |
| Belarus  | Male   | 15 to 19 | 29.2 | (20.1 to 39.9) | 9.9 | (5.8 to 15.4) | 0.1 | (0.0 to 0.1) |
| Belarus  | Female | 1 to 4   | 2.5  | (1.7 to 3.5)   | 1.3 | (0.7 to 2.3)  | 0   | (0.0 to 0.0) |
| Belarus  | Female | 5 to 9   | 7.1  | (5.2 to 9.5)   | 1.9 | (1.2 to 2.7)  | 0   | (0.0 to 0.0) |
| Belarus  | Female | 10 to 14 | 13.1 | (9.5 to 17.1)  | 3.1 | (2.0 to 4.4)  | 0   | (0.0 to 0.0) |
| Belarus  | Female | 15 to 19 | 19.5 | (13.8 to 25.8) | 9.4 | (6.1 to 14.7) | 0.1 | (0.0 to 0.2) |
| Belarus  | Both   | 1 to 4   | 3.4  | (2.5 to 4.3)   | 1   | (0.6 to 1.5)  | 0   | (0.0 to 0.0) |
| Belarus  | Both   | 5 to 9   | 9.4  | (7.4 to 11.5)  | 2.2 | (1.5 to 3.0)  | 0   | (0.0 to 0.0) |
| Belarus  | Both   | 10 to 14 | 16.9 | (13.4 to 20.9) | 3.5 | (2.3 to 4.9)  | 0   | (0.0 to 0.0) |
| Belarus  | Both   | 15 to 19 | 24.5 | (18.8 to 31.3) | 9.7 | (6.6 to 13.6) | 0.1 | (0.0 to 0.1) |
| Estonia  | Male   | 1 to 4   | 5    | (3.4 to 6.6)   | 2.2 | (1.2 to 3.4)  | 0   | (0.0 to 0.0) |
| Estonia  | Male   | 5 to 9   | 13.4 | (9.7 to 17.2)  | 4.2 | (2.8 to 6.0)  | 0   | (0.0 to 0.0) |
| Estonia  | Male   | 10 to 14 | 23.8 | (17.4 to 30.9) | 4.9 | (3.0 to 7.2)  | 0   | (0.0 to 0.0) |
| Estonia  | Male   | 15 to 19 | 34   | (24.6 to 45.7) | 11  | (6.8 to 16.5) | 0.1 | (0.0 to 0.1) |
| Estonia  | Female | 1 to 4   | 3.2  | (2.2 to 4.4)   | 0.7 | (0.4 to 1.0)  | 0   | (0.0 to 0.0) |
| Estonia  | Female | 5 to 9   | 9    | (6.6 to 11.5)  | 1.7 | (1.1 to 2.4)  | 0   | (0.0 to 0.0) |
| Estonia  | Female | 10 to 14 | 16.3 | (11.8 to 21.1) | 3.4 | (2.2 to 4.7)  | 0   | (0.0 to 0.0) |

|           |        |          |      |                |      |               |     |              |
|-----------|--------|----------|------|----------------|------|---------------|-----|--------------|
| Estonia   | Female | 15 to 19 | 23.4 | (16.0 to 31.0) | 7.7  | (5.0 to 12.0) | 0.1 | (0.0 to 0.1) |
| Estonia   | Both   | 1 to 4   | 4.1  | (3.1 to 5.2)   | 1.5  | (0.8 to 2.2)  | 0   | (0.0 to 0.0) |
| Estonia   | Both   | 5 to 9   | 11.3 | (9.0 to 13.8)  | 3    | (2.0 to 4.1)  | 0   | (0.0 to 0.0) |
| Estonia   | Both   | 10 to 14 | 20.2 | (16.6 to 24.5) | 4.2  | (2.8 to 5.8)  | 0   | (0.0 to 0.0) |
| Estonia   | Both   | 15 to 19 | 28.8 | (23.1 to 35.6) | 9.4  | (6.4 to 13.1) | 0.1 | (0.0 to 0.1) |
| Latvia    | Male   | 1 to 4   | 4    | (2.8 to 5.4)   | 3.2  | (1.6 to 5.4)  | 0   | (0.0 to 0.1) |
| Latvia    | Male   | 5 to 9   | 11.1 | (8.0 to 14.7)  | 2.3  | (1.4 to 3.5)  | 0   | (0.0 to 0.0) |
| Latvia    | Male   | 10 to 14 | 20   | (14.6 to 26.6) | 3.7  | (2.3 to 5.6)  | 0   | (0.0 to 0.0) |
| Latvia    | Male   | 15 to 19 | 29   | (20.2 to 39.9) | 7.5  | (4.5 to 11.0) | 0   | (0.0 to 0.1) |
| Latvia    | Female | 1 to 4   | 2.3  | (1.4 to 3.2)   | 2.6  | (1.4 to 4.1)  | 0   | (0.0 to 0.0) |
| Latvia    | Female | 5 to 9   | 6.5  | (4.4 to 8.9)   | 2.5  | (1.4 to 3.6)  | 0   | (0.0 to 0.0) |
| Latvia    | Female | 10 to 14 | 12.4 | (8.8 to 16.6)  | 3.1  | (1.9 to 4.3)  | 0   | (0.0 to 0.0) |
| Latvia    | Female | 15 to 19 | 18.5 | (12.7 to 25.8) | 10.8 | (7.0 to 16.2) | 0.1 | (0.1 to 0.2) |
| Latvia    | Both   | 1 to 4   | 3.2  | (2.4 to 4.0)   | 2.9  | (1.8 to 4.3)  | 0   | (0.0 to 0.0) |
| Latvia    | Both   | 5 to 9   | 8.9  | (6.9 to 10.9)  | 2.4  | (1.6 to 3.4)  | 0   | (0.0 to 0.0) |
| Latvia    | Both   | 10 to 14 | 16.3 | (12.7 to 20.2) | 3.4  | (2.3 to 4.8)  | 0   | (0.0 to 0.0) |
| Latvia    | Both   | 15 to 19 | 24   | (18.0 to 30.2) | 9.1  | (6.2 to 12.6) | 0.1 | (0.0 to 0.1) |
| Lithuania | Male   | 1 to 4   | 2.8  | (1.9 to 4.0)   | 0.6  | (0.4 to 0.9)  | 0   | (0.0 to 0.0) |
| Lithuania | Male   | 5 to 9   | 7.9  | (5.7 to 10.8)  | 1.5  | (0.9 to 2.3)  | 0   | (0.0 to 0.0) |
| Lithuania | Male   | 10 to 14 | 14.5 | (10.2 to 19.5) | 2.7  | (1.7 to 4.2)  | 0   | (0.0 to 0.0) |
| Lithuania | Male   | 15 to 19 | 21.2 | (14.0 to 29.3) | 6.4  | (4.1 to 9.6)  | 0   | (0.0 to 0.1) |
| Lithuania | Female | 1 to 4   | 1.7  | (1.1 to 2.3)   | 0.4  | (0.3 to 0.7)  | 0   | (0.0 to 0.0) |
| Lithuania | Female | 5 to 9   | 5    | (3.4 to 6.5)   | 1    | (0.6 to 1.5)  | 0   | (0.0 to 0.0) |
| Lithuania | Female | 10 to 14 | 9.5  | (6.5 to 12.5)  | 2.1  | (1.3 to 2.9)  | 0   | (0.0 to 0.0) |
| Lithuania | Female | 15 to 19 | 14.2 | (9.4 to 19.5)  | 3.7  | (2.2 to 5.5)  | 0   | (0.0 to 0.0) |
| Lithuania | Both   | 1 to 4   | 2.3  | (1.7 to 3.0)   | 0.5  | (0.4 to 0.8)  | 0   | (0.0 to 0.0) |
| Lithuania | Both   | 5 to 9   | 6.5  | (5.2 to 8.3)   | 1.3  | (0.9 to 1.9)  | 0   | (0.0 to 0.0) |
| Lithuania | Both   | 10 to 14 | 12.1 | (9.4 to 15.2)  | 2.4  | (1.6 to 3.4)  | 0   | (0.0 to 0.0) |
| Lithuania | Both   | 15 to 19 | 17.8 | (13.2 to 23.0) | 5.1  | (3.5 to 7.2)  | 0   | (0.0 to 0.1) |
| Moldova   | Male   | 1 to 4   | 3.9  | (2.5 to 5.3)   | 1.5  | (0.8 to 2.3)  | 0   | (0.0 to 0.0) |
| Moldova   | Male   | 5 to 9   | 10.6 | (7.3 to 14.1)  | 2.4  | (1.5 to 3.4)  | 0   | (0.0 to 0.0) |
| Moldova   | Male   | 10 to 14 | 19   | (13.0 to 25.6) | 4    | (2.5 to 5.9)  | 0   | (0.0 to 0.0) |
| Moldova   | Male   | 15 to 19 | 27.5 | (17.2 to 38.7) | 13   | (7.8 to 19.5) | 0.1 | (0.1 to 0.2) |

|         |        |          |      |                |      |               |     |              |
|---------|--------|----------|------|----------------|------|---------------|-----|--------------|
| Moldova | Female | 1 to 4   | 2.1  | (1.4 to 2.9)   | 1    | (0.6 to 1.5)  | 0   | (0.0 to 0.0) |
| Moldova | Female | 5 to 9   | 6.2  | (4.4 to 8.3)   | 1.5  | (1.0 to 2.1)  | 0   | (0.0 to 0.0) |
| Moldova | Female | 10 to 14 | 11.8 | (8.4 to 15.9)  | 2.5  | (1.6 to 3.5)  | 0   | (0.0 to 0.0) |
| Moldova | Female | 15 to 19 | 17.7 | (12.3 to 24.4) | 8    | (4.6 to 11.6) | 0.1 | (0.0 to 0.1) |
| Moldova | Both   | 1 to 4   | 3    | (2.2 to 3.9)   | 1.2  | (0.8 to 1.8)  | 0   | (0.0 to 0.0) |
| Moldova | Both   | 5 to 9   | 8.4  | (6.4 to 10.6)  | 2    | (1.3 to 2.6)  | 0   | (0.0 to 0.0) |
| Moldova | Both   | 10 to 14 | 15.5 | (11.8 to 19.7) | 3.3  | (2.2 to 4.4)  | 0   | (0.0 to 0.0) |
| Moldova | Both   | 15 to 19 | 22.6 | (16.5 to 29.5) | 10.5 | (6.9 to 14.5) | 0.1 | (0.0 to 0.2) |
| Russia  | Male   | 1 to 4   | 2    | (1.3 to 2.7)   | 0.8  | (0.4 to 1.6)  | 0   | (0.0 to 0.0) |
| Russia  | Male   | 5 to 9   | 5.8  | (3.9 to 7.7)   | 1.2  | (0.8 to 1.8)  | 0   | (0.0 to 0.0) |
| Russia  | Male   | 10 to 14 | 10.6 | (7.3 to 14.2)  | 2.2  | (1.3 to 3.2)  | 0   | (0.0 to 0.0) |
| Russia  | Male   | 15 to 19 | 15.8 | (10.5 to 22.7) | 10   | (5.9 to 16.4) | 0.1 | (0.1 to 0.2) |
| Russia  | Female | 1 to 4   | 1.3  | (0.8 to 1.9)   | 0.8  | (0.4 to 1.6)  | 0   | (0.0 to 0.0) |
| Russia  | Female | 5 to 9   | 3.9  | (2.6 to 5.4)   | 1.2  | (0.8 to 1.8)  | 0   | (0.0 to 0.0) |
| Russia  | Female | 10 to 14 | 7.5  | (5.0 to 10.2)  | 2    | (1.4 to 3.0)  | 0   | (0.0 to 0.0) |
| Russia  | Female | 15 to 19 | 11.4 | (6.9 to 16.5)  | 8.8  | (4.8 to 13.4) | 0.1 | (0.0 to 0.2) |
| Russia  | Both   | 1 to 4   | 1.7  | (1.2 to 2.2)   | 0.8  | (0.5 to 1.5)  | 0   | (0.0 to 0.0) |
| Russia  | Both   | 5 to 9   | 4.8  | (3.6 to 6.2)   | 1.2  | (0.8 to 1.7)  | 0   | (0.0 to 0.0) |
| Russia  | Both   | 10 to 14 | 9.1  | (6.9 to 11.5)  | 2.1  | (1.5 to 2.9)  | 0   | (0.0 to 0.0) |
| Russia  | Both   | 15 to 19 | 13.7 | (10.2 to 18.0) | 9.4  | (6.6 to 13.5) | 0.1 | (0.1 to 0.2) |
| Ukraine | Male   | 1 to 4   | 6    | (4.0 to 8.2)   | 2.8  | (1.4 to 5.1)  | 0   | (0.0 to 0.0) |
| Ukraine | Male   | 5 to 9   | 16   | (11.4 to 21.5) | 3.8  | (2.4 to 5.7)  | 0   | (0.0 to 0.0) |
| Ukraine | Male   | 10 to 14 | 27.7 | (20.6 to 36.9) | 5.3  | (3.3 to 7.9)  | 0   | (0.0 to 0.0) |
| Ukraine | Male   | 15 to 19 | 38.1 | (27.6 to 51.1) | 11.3 | (6.2 to 17.9) | 0.1 | (0.0 to 0.1) |
| Ukraine | Female | 1 to 4   | 3    | (1.8 to 4.1)   | 2.1  | (1.0 to 3.7)  | 0   | (0.0 to 0.0) |
| Ukraine | Female | 5 to 9   | 8.3  | (5.1 to 11.3)  | 2.5  | (1.5 to 3.7)  | 0   | (0.0 to 0.0) |
| Ukraine | Female | 10 to 14 | 15.3 | (10.5 to 20.9) | 3.7  | (2.3 to 5.5)  | 0   | (0.0 to 0.0) |
| Ukraine | Female | 15 to 19 | 22.7 | (15.3 to 31.1) | 8.7  | (5.3 to 12.8) | 0.1 | (0.0 to 0.1) |
| Ukraine | Both   | 1 to 4   | 4.5  | (3.4 to 5.7)   | 2.5  | (1.3 to 4.0)  | 0   | (0.0 to 0.0) |
| Ukraine | Both   | 5 to 9   | 12.3 | (9.6 to 15.3)  | 3.2  | (2.1 to 4.4)  | 0   | (0.0 to 0.0) |
| Ukraine | Both   | 10 to 14 | 21.6 | (17.2 to 26.9) | 4.5  | (3.1 to 6.3)  | 0   | (0.0 to 0.0) |
| Ukraine | Both   | 15 to 19 | 30.6 | (24.2 to 38.3) | 10   | (6.5 to 14.1) | 0.1 | (0.0 to 0.1) |
| Brunei  | Male   | 1 to 4   | 1.3  | (0.6 to 2.6)   | 9.1  | (2.6 to 22.2) | 0.1 | (0.0 to 0.3) |

|             |        |          |      |               |      |               |     |              |
|-------------|--------|----------|------|---------------|------|---------------|-----|--------------|
| Brunei      | Male   | 5 to 9   | 4    | (2.1 to 7.1)  | 1.1  | (0.6 to 1.9)  | 0   | (0.0 to 0.0) |
| Brunei      | Male   | 10 to 14 | 7.9  | (4.7 to 12.2) | 10.8 | (4.5 to 22.2) | 0.1 | (0.0 to 0.3) |
| Brunei      | Male   | 15 to 19 | 12.6 | (7.7 to 19.1) | 5.1  | (2.2 to 10.9) | 0   | (0.0 to 0.1) |
| Brunei      | Female | 1 to 4   | 0.8  | (0.4 to 1.3)  | 0.8  | (0.2 to 2.2)  | 0   | (0.0 to 0.0) |
| Brunei      | Female | 5 to 9   | 2.5  | (1.4 to 3.9)  | 13.9 | (4.5 to 28.2) | 0.2 | (0.1 to 0.4) |
| Brunei      | Female | 10 to 14 | 5.1  | (3.1 to 7.3)  | 10.5 | (2.7 to 21.8) | 0.1 | (0.0 to 0.3) |
| Brunei      | Female | 15 to 19 | 8.7  | (5.5 to 13.0) | 4.3  | (1.4 to 8.6)  | 0   | (0.0 to 0.1) |
| Brunei      | Both   | 1 to 4   | 1    | (0.6 to 1.7)  | 5.1  | (1.5 to 12.0) | 0.1 | (0.0 to 0.1) |
| Brunei      | Both   | 5 to 9   | 3.2  | (2.2 to 4.8)  | 7.4  | (2.6 to 14.5) | 0.1 | (0.0 to 0.2) |
| Brunei      | Both   | 10 to 14 | 6.5  | (4.7 to 9.0)  | 10.7 | (6.3 to 17.6) | 0.1 | (0.1 to 0.2) |
| Brunei      | Both   | 15 to 19 | 10.7 | (7.6 to 14.3) | 4.7  | (2.2 to 8.4)  | 0   | (0.0 to 0.1) |
| Japan       | Male   | 1 to 4   | 1.1  | (0.6 to 1.9)  | 1.7  | (0.6 to 3.4)  | 0   | (0.0 to 0.0) |
| Japan       | Male   | 5 to 9   | 3.3  | (1.9 to 5.4)  | 0.9  | (0.6 to 1.4)  | 0   | (0.0 to 0.0) |
| Japan       | Male   | 10 to 14 | 6.7  | (4.2 to 9.9)  | 1.9  | (1.2 to 2.8)  | 0   | (0.0 to 0.0) |
| Japan       | Male   | 15 to 19 | 10.9 | (6.9 to 16.6) | 3.6  | (2.3 to 5.4)  | 0   | (0.0 to 0.0) |
| Japan       | Female | 1 to 4   | 0.6  | (0.3 to 1.0)  | 0.6  | (0.3 to 1.0)  | 0   | (0.0 to 0.0) |
| Japan       | Female | 5 to 9   | 2.1  | (1.2 to 3.2)  | 1    | (0.6 to 1.6)  | 0   | (0.0 to 0.0) |
| Japan       | Female | 10 to 14 | 4.5  | (2.8 to 6.5)  | 1.5  | (1.0 to 2.4)  | 0   | (0.0 to 0.0) |
| Japan       | Female | 15 to 19 | 7.5  | (4.8 to 11.1) | 3    | (2.0 to 5.2)  | 0   | (0.0 to 0.1) |
| Japan       | Both   | 1 to 4   | 0.9  | (0.6 to 1.3)  | 1.2  | (0.6 to 2.1)  | 0   | (0.0 to 0.0) |
| Japan       | Both   | 5 to 9   | 2.7  | (1.9 to 3.8)  | 1    | (0.7 to 1.4)  | 0   | (0.0 to 0.0) |
| Japan       | Both   | 10 to 14 | 5.6  | (4.0 to 7.7)  | 1.7  | (1.2 to 2.4)  | 0   | (0.0 to 0.0) |
| Japan       | Both   | 15 to 19 | 9.2  | (6.7 to 12.7) | 3.3  | (2.4 to 4.7)  | 0   | (0.0 to 0.0) |
| South Korea | Male   | 1 to 4   | 1.1  | (0.6 to 1.9)  | 6.4  | (2.6 to 11.3) | 0.1 | (0.0 to 0.1) |
| South Korea | Male   | 5 to 9   | 3.6  | (2.0 to 5.6)  | 1.7  | (1.0 to 2.6)  | 0   | (0.0 to 0.0) |
| South Korea | Male   | 10 to 14 | 7.2  | (4.5 to 10.6) | 2.8  | (1.7 to 4.1)  | 0   | (0.0 to 0.0) |
| South Korea | Male   | 15 to 19 | 11.8 | (7.3 to 17.1) | 6.8  | (3.7 to 10.3) | 0.1 | (0.0 to 0.1) |
| South Korea | Female | 1 to 4   | 0.7  | (0.4 to 1.1)  | 3.6  | (1.7 to 7.0)  | 0   | (0.0 to 0.1) |
| South Korea | Female | 5 to 9   | 2.5  | (1.4 to 3.6)  | 2.6  | (1.2 to 4.0)  | 0   | (0.0 to 0.0) |
| South Korea | Female | 10 to 14 | 5.3  | (3.3 to 7.8)  | 2.7  | (1.7 to 4.1)  | 0   | (0.0 to 0.0) |
| South Korea | Female | 15 to 19 | 8.9  | (5.7 to 13.6) | 4.4  | (2.7 to 8.0)  | 0   | (0.0 to 0.1) |
| South Korea | Both   | 1 to 4   | 0.9  | (0.6 to 1.4)  | 5    | (2.5 to 8.2)  | 0.1 | (0.0 to 0.1) |
| South Korea | Both   | 5 to 9   | 3    | (2.0 to 4.3)  | 2.1  | (1.1 to 3.0)  | 0   | (0.0 to 0.0) |

|             |        |          |      |               |     |              |     |              |
|-------------|--------|----------|------|---------------|-----|--------------|-----|--------------|
| South Korea | Both   | 10 to 14 | 6.3  | (4.4 to 8.5)  | 2.8 | (1.9 to 3.7) | 0   | (0.0 to 0.0) |
| South Korea | Both   | 15 to 19 | 10.4 | (7.4 to 14.1) | 5.6 | (3.7 to 8.0) | 0.1 | (0.0 to 0.1) |
| Singapore   | Male   | 1 to 4   | 1.2  | (0.6 to 2.0)  | 1.7 | (0.8 to 3.0) | 0   | (0.0 to 0.0) |
| Singapore   | Male   | 5 to 9   | 3.6  | (2.1 to 5.9)  | 0.8 | (0.5 to 1.3) | 0   | (0.0 to 0.0) |
| Singapore   | Male   | 10 to 14 | 7.2  | (4.4 to 10.9) | 1.7 | (1.0 to 2.5) | 0   | (0.0 to 0.0) |
| Singapore   | Male   | 15 to 19 | 11.8 | (6.9 to 17.4) | 4.4 | (2.7 to 6.7) | 0   | (0.0 to 0.1) |
| Singapore   | Female | 1 to 4   | 0.7  | (0.4 to 1.1)  | 0.4 | (0.2 to 0.7) | 0   | (0.0 to 0.0) |
| Singapore   | Female | 5 to 9   | 2.3  | (1.3 to 3.4)  | 1.3 | (0.7 to 2.3) | 0   | (0.0 to 0.0) |
| Singapore   | Female | 10 to 14 | 4.9  | (3.0 to 7.1)  | 1.2 | (0.6 to 1.8) | 0   | (0.0 to 0.0) |
| Singapore   | Female | 15 to 19 | 8.3  | (5.0 to 13.2) | 1.9 | (1.0 to 3.0) | 0   | (0.0 to 0.0) |
| Singapore   | Both   | 1 to 4   | 0.9  | (0.6 to 1.4)  | 1.1 | (0.6 to 1.8) | 0   | (0.0 to 0.0) |
| Singapore   | Both   | 5 to 9   | 2.9  | (2.0 to 4.1)  | 1.1 | (0.7 to 1.6) | 0   | (0.0 to 0.0) |
| Singapore   | Both   | 10 to 14 | 6.1  | (4.4 to 8.2)  | 1.4 | (0.9 to 2.1) | 0   | (0.0 to 0.0) |
| Singapore   | Both   | 15 to 19 | 10.1 | (7.3 to 13.5) | 3.2 | (2.1 to 4.6) | 0   | (0.0 to 0.0) |
| Australia   | Male   | 1 to 4   | 1.4  | (0.8 to 2.1)  | 1.4 | (0.7 to 2.3) | 0   | (0.0 to 0.0) |
| Australia   | Male   | 5 to 9   | 4.3  | (2.8 to 6.1)  | 1.1 | (0.7 to 1.6) | 0   | (0.0 to 0.0) |
| Australia   | Male   | 10 to 14 | 8.8  | (6.0 to 12.3) | 1.9 | (1.2 to 2.9) | 0   | (0.0 to 0.0) |
| Australia   | Male   | 15 to 19 | 14.4 | (9.3 to 20.6) | 3.7 | (2.3 to 5.3) | 0   | (0.0 to 0.0) |
| Australia   | Female | 1 to 4   | 1    | (0.6 to 1.5)  | 0.7 | (0.4 to 1.2) | 0   | (0.0 to 0.0) |
| Australia   | Female | 5 to 9   | 3.2  | (2.0 to 4.5)  | 1   | (0.6 to 1.4) | 0   | (0.0 to 0.0) |
| Australia   | Female | 10 to 14 | 6.7  | (4.7 to 9.1)  | 1.7 | (1.1 to 2.5) | 0   | (0.0 to 0.0) |
| Australia   | Female | 15 to 19 | 11.3 | (7.9 to 15.5) | 3.3 | (2.2 to 4.6) | 0   | (0.0 to 0.0) |
| Australia   | Both   | 1 to 4   | 1.2  | (0.8 to 1.6)  | 1.1 | (0.6 to 1.7) | 0   | (0.0 to 0.0) |
| Australia   | Both   | 5 to 9   | 3.8  | (2.8 to 4.9)  | 1   | (0.7 to 1.4) | 0   | (0.0 to 0.0) |
| Australia   | Both   | 10 to 14 | 7.8  | (6.0 to 9.8)  | 1.8 | (1.3 to 2.5) | 0   | (0.0 to 0.0) |
| Australia   | Both   | 15 to 19 | 12.9 | (9.7 to 16.7) | 3.5 | (2.5 to 4.7) | 0   | (0.0 to 0.0) |
| New Zealand | Male   | 1 to 4   | 0.5  | (0.3 to 0.9)  | 1.9 | (0.9 to 3.6) | 0   | (0.0 to 0.0) |
| New Zealand | Male   | 5 to 9   | 1.8  | (0.9 to 2.8)  | 0.5 | (0.3 to 0.8) | 0   | (0.0 to 0.0) |
| New Zealand | Male   | 10 to 14 | 3.7  | (2.3 to 5.5)  | 1.4 | (0.9 to 2.1) | 0   | (0.0 to 0.0) |
| New Zealand | Male   | 15 to 19 | 5.9  | (3.9 to 8.6)  | 2.3 | (1.4 to 3.5) | 0   | (0.0 to 0.0) |
| New Zealand | Female | 1 to 4   | 0.5  | (0.3 to 1.0)  | 0.4 | (0.1 to 0.7) | 0   | (0.0 to 0.0) |
| New Zealand | Female | 5 to 9   | 1.7  | (1.0 to 2.7)  | 0.9 | (0.5 to 1.4) | 0   | (0.0 to 0.0) |
| New Zealand | Female | 10 to 14 | 3.6  | (2.3 to 5.3)  | 1.4 | (0.9 to 2.0) | 0   | (0.0 to 0.0) |

|             |        |          |      |                |     |              |     |              |
|-------------|--------|----------|------|----------------|-----|--------------|-----|--------------|
| New Zealand | Female | 15 to 19 | 6.1  | (3.9 to 9.2)   | 2.8 | (1.7 to 4.1) | 0   | (0.0 to 0.0) |
| New Zealand | Both   | 1 to 4   | 0.5  | (0.3 to 0.8)   | 1.2 | (0.6 to 2.1) | 0   | (0.0 to 0.0) |
| New Zealand | Both   | 5 to 9   | 1.7  | (1.1 to 2.4)   | 0.7 | (0.4 to 1.0) | 0   | (0.0 to 0.0) |
| New Zealand | Both   | 10 to 14 | 3.6  | (2.6 to 4.8)   | 1.4 | (1.0 to 1.9) | 0   | (0.0 to 0.0) |
| New Zealand | Both   | 15 to 19 | 6    | (4.3 to 7.9)   | 2.5 | (1.7 to 3.5) | 0   | (0.0 to 0.0) |
| Andorra     | Male   | 1 to 4   | 1.5  | (0.7 to 2.6)   | 0.7 | (0.3 to 1.6) | 0   | (0.0 to 0.0) |
| Andorra     | Male   | 5 to 9   | 4.5  | (2.2 to 7.1)   | 1   | (0.5 to 1.7) | 0   | (0.0 to 0.0) |
| Andorra     | Male   | 10 to 14 | 9.1  | (5.2 to 13.6)  | 2   | (1.2 to 3.1) | 0   | (0.0 to 0.0) |
| Andorra     | Male   | 15 to 19 | 15.3 | (9.2 to 22.2)  | 3.8 | (2.2 to 6.2) | 0   | (0.0 to 0.0) |
| Andorra     | Female | 1 to 4   | 1.4  | (0.8 to 2.3)   | 0.9 | (0.3 to 2.1) | 0   | (0.0 to 0.0) |
| Andorra     | Female | 5 to 9   | 4.4  | (2.6 to 6.6)   | 1.2 | (0.6 to 2.0) | 0   | (0.0 to 0.0) |
| Andorra     | Female | 10 to 14 | 8.9  | (5.6 to 12.7)  | 2.1 | (1.2 to 3.4) | 0   | (0.0 to 0.0) |
| Andorra     | Female | 15 to 19 | 14.6 | (8.4 to 20.8)  | 3.7 | (2.1 to 6.2) | 0   | (0.0 to 0.0) |
| Andorra     | Both   | 1 to 4   | 1.5  | (0.9 to 2.2)   | 0.8 | (0.4 to 1.6) | 0   | (0.0 to 0.0) |
| Andorra     | Both   | 5 to 9   | 4.4  | (3.0 to 6.3)   | 1.1 | (0.7 to 1.7) | 0   | (0.0 to 0.0) |
| Andorra     | Both   | 10 to 14 | 9    | (6.4 to 12.1)  | 2.1 | (1.3 to 3.0) | 0   | (0.0 to 0.0) |
| Andorra     | Both   | 15 to 19 | 15   | (10.1 to 19.9) | 3.8 | (2.5 to 5.7) | 0   | (0.0 to 0.0) |
| Austria     | Male   | 1 to 4   | 1.5  | (0.6 to 2.5)   | 2.3 | (1.0 to 4.3) | 0   | (0.0 to 0.0) |
| Austria     | Male   | 5 to 9   | 4.5  | (2.1 to 7.0)   | 1.8 | (1.1 to 2.7) | 0   | (0.0 to 0.0) |
| Austria     | Male   | 10 to 14 | 9.2  | (5.2 to 13.3)  | 3.5 | (2.2 to 5.3) | 0   | (0.0 to 0.0) |
| Austria     | Male   | 15 to 19 | 15.1 | (8.7 to 22.0)  | 6.6 | (4.2 to 9.8) | 0.1 | (0.0 to 0.1) |
| Austria     | Female | 1 to 4   | 1.3  | (0.7 to 2.1)   | 2.4 | (1.2 to 4.8) | 0   | (0.0 to 0.1) |
| Austria     | Female | 5 to 9   | 4.3  | (2.3 to 6.6)   | 1.5 | (1.0 to 2.2) | 0   | (0.0 to 0.0) |
| Austria     | Female | 10 to 14 | 9    | (5.7 to 13.4)  | 3.1 | (2.1 to 4.9) | 0   | (0.0 to 0.0) |
| Austria     | Female | 15 to 19 | 15.2 | (9.8 to 22.0)  | 5.6 | (3.7 to 8.6) | 0   | (0.0 to 0.1) |
| Austria     | Both   | 1 to 4   | 1.4  | (0.8 to 2.0)   | 2.3 | (1.2 to 3.9) | 0   | (0.0 to 0.0) |
| Austria     | Both   | 5 to 9   | 4.4  | (2.6 to 5.9)   | 1.7 | (1.2 to 2.3) | 0   | (0.0 to 0.0) |
| Austria     | Both   | 10 to 14 | 9.1  | (6.4 to 12.1)  | 3.3 | (2.3 to 4.6) | 0   | (0.0 to 0.0) |
| Austria     | Both   | 15 to 19 | 15.1 | (10.7 to 19.8) | 6.1 | (4.3 to 8.3) | 0.1 | (0.0 to 0.1) |
| Belgium     | Male   | 1 to 4   | 1.5  | (0.6 to 2.7)   | 1.9 | (0.9 to 3.3) | 0   | (0.0 to 0.0) |
| Belgium     | Male   | 5 to 9   | 4.7  | (1.5 to 7.4)   | 1.4 | (0.8 to 2.3) | 0   | (0.0 to 0.0) |
| Belgium     | Male   | 10 to 14 | 9.5  | (4.3 to 14.3)  | 3.1 | (1.8 to 4.8) | 0   | (0.0 to 0.0) |
| Belgium     | Male   | 15 to 19 | 15.7 | (8.4 to 23.5)  | 4.9 | (3.1 to 7.5) | 0   | (0.0 to 0.1) |

|         |        |          |      |                |     |               |     |              |
|---------|--------|----------|------|----------------|-----|---------------|-----|--------------|
| Belgium | Female | 1 to 4   | 1.3  | (0.5 to 2.1)   | 3   | (1.2 to 9.5)  | 0   | (0.0 to 0.1) |
| Belgium | Female | 5 to 9   | 4    | (1.8 to 6.0)   | 1.6 | (1.0 to 2.6)  | 0   | (0.0 to 0.0) |
| Belgium | Female | 10 to 14 | 8.3  | (5.1 to 11.9)  | 2.6 | (1.7 to 3.9)  | 0   | (0.0 to 0.0) |
| Belgium | Female | 15 to 19 | 13.8 | (7.9 to 20.2)  | 6.6 | (3.9 to 13.1) | 0.1 | (0.0 to 0.2) |
| Belgium | Both   | 1 to 4   | 1.4  | (0.8 to 2.1)   | 2.4 | (1.2 to 5.7)  | 0   | (0.0 to 0.1) |
| Belgium | Both   | 5 to 9   | 4.3  | (2.5 to 6.0)   | 1.5 | (1.0 to 2.1)  | 0   | (0.0 to 0.0) |
| Belgium | Both   | 10 to 14 | 8.9  | (6.0 to 11.9)  | 2.8 | (1.9 to 4.0)  | 0   | (0.0 to 0.0) |
| Belgium | Both   | 15 to 19 | 14.8 | (10.3 to 19.7) | 5.7 | (3.8 to 9.4)  | 0   | (0.0 to 0.1) |
| Cyprus  | Male   | 1 to 4   | 1.4  | (0.7 to 2.2)   | 1.2 | (0.6 to 2.4)  | 0   | (0.0 to 0.0) |
| Cyprus  | Male   | 5 to 9   | 4.2  | (2.4 to 6.2)   | 2.3 | (1.1 to 4.2)  | 0   | (0.0 to 0.0) |
| Cyprus  | Male   | 10 to 14 | 8.6  | (5.5 to 12.3)  | 3   | (1.9 to 4.6)  | 0   | (0.0 to 0.0) |
| Cyprus  | Male   | 15 to 19 | 14.4 | (8.6 to 20.7)  | 4.5 | (2.4 to 7.4)  | 0   | (0.0 to 0.1) |
| Cyprus  | Female | 1 to 4   | 1.4  | (0.8 to 2.1)   | 2.1 | (0.4 to 5.4)  | 0   | (0.0 to 0.1) |
| Cyprus  | Female | 5 to 9   | 4.3  | (2.6 to 6.3)   | 8.3 | (3.6 to 18.6) | 0.1 | (0.0 to 0.2) |
| Cyprus  | Female | 10 to 14 | 8.8  | (5.5 to 12.7)  | 3.5 | (2.0 to 5.7)  | 0   | (0.0 to 0.1) |
| Cyprus  | Female | 15 to 19 | 14.5 | (8.5 to 21.8)  | 7.3 | (3.4 to 13.4) | 0.1 | (0.0 to 0.2) |
| Cyprus  | Both   | 1 to 4   | 1.4  | (0.9 to 1.9)   | 1.7 | (0.5 to 3.4)  | 0   | (0.0 to 0.0) |
| Cyprus  | Both   | 5 to 9   | 4.2  | (3.1 to 5.5)   | 5.2 | (2.7 to 9.8)  | 0.1 | (0.0 to 0.1) |
| Cyprus  | Both   | 10 to 14 | 8.7  | (6.6 to 11.1)  | 3.3 | (2.3 to 4.4)  | 0   | (0.0 to 0.0) |
| Cyprus  | Both   | 15 to 19 | 14.4 | (10.4 to 19.1) | 5.9 | (3.3 to 9.0)  | 0.1 | (0.0 to 0.1) |
| Denmark | Male   | 1 to 4   | 2.8  | (1.8 to 4.0)   | 1.6 | (1.0 to 2.6)  | 0   | (0.0 to 0.0) |
| Denmark | Male   | 5 to 9   | 8    | (5.7 to 10.9)  | 2.1 | (1.4 to 3.0)  | 0   | (0.0 to 0.0) |
| Denmark | Male   | 10 to 14 | 15.4 | (11.0 to 20.7) | 4.4 | (3.0 to 6.3)  | 0   | (0.0 to 0.0) |
| Denmark | Male   | 15 to 19 | 24.5 | (17.2 to 33.5) | 5.8 | (3.7 to 8.4)  | 0   | (0.0 to 0.0) |
| Denmark | Female | 1 to 4   | 2    | (1.3 to 2.8)   | 1   | (0.5 to 1.5)  | 0   | (0.0 to 0.0) |
| Denmark | Female | 5 to 9   | 6.3  | (4.4 to 8.3)   | 1.5 | (0.9 to 2.1)  | 0   | (0.0 to 0.0) |
| Denmark | Female | 10 to 14 | 13   | (9.5 to 17.0)  | 3.7 | (2.5 to 5.4)  | 0   | (0.0 to 0.0) |
| Denmark | Female | 15 to 19 | 21.6 | (14.7 to 29.0) | 7.3 | (5.0 to 9.9)  | 0.1 | (0.0 to 0.1) |
| Denmark | Both   | 1 to 4   | 2.4  | (1.8 to 3.1)   | 1.3 | (0.9 to 1.9)  | 0   | (0.0 to 0.0) |
| Denmark | Both   | 5 to 9   | 7.1  | (5.7 to 8.9)   | 1.8 | (1.3 to 2.4)  | 0   | (0.0 to 0.0) |
| Denmark | Both   | 10 to 14 | 14.2 | (11.6 to 17.3) | 4.1 | (2.9 to 5.5)  | 0   | (0.0 to 0.0) |
| Denmark | Both   | 15 to 19 | 23.1 | (18.5 to 28.4) | 6.5 | (4.7 to 8.5)  | 0   | (0.0 to 0.1) |
| Finland | Male   | 1 to 4   | 1.6  | (0.9 to 2.5)   | 0.6 | (0.3 to 0.9)  | 0   | (0.0 to 0.0) |

|         |        |          |      |                |     |              |   |              |
|---------|--------|----------|------|----------------|-----|--------------|---|--------------|
| Finland | Male   | 5 to 9   | 4.7  | (2.7 to 6.9)   | 1.6 | (0.9 to 2.5) | 0 | (0.0 to 0.0) |
| Finland | Male   | 10 to 14 | 9.1  | (5.9 to 12.9)  | 2   | (1.2 to 3.0) | 0 | (0.0 to 0.0) |
| Finland | Male   | 15 to 19 | 14.4 | (9.6 to 20.8)  | 3.5 | (2.1 to 5.4) | 0 | (0.0 to 0.0) |
| Finland | Female | 1 to 4   | 1.3  | (0.8 to 2.0)   | 0.4 | (0.2 to 0.7) | 0 | (0.0 to 0.0) |
| Finland | Female | 5 to 9   | 4    | (2.6 to 5.8)   | 1.5 | (0.9 to 3.1) | 0 | (0.0 to 0.0) |
| Finland | Female | 10 to 14 | 8.4  | (5.4 to 11.3)  | 1.9 | (1.2 to 2.8) | 0 | (0.0 to 0.0) |
| Finland | Female | 15 to 19 | 13.9 | (9.1 to 19.1)  | 4.2 | (2.7 to 6.0) | 0 | (0.0 to 0.0) |
| Finland | Both   | 1 to 4   | 1.4  | (1.0 to 2.1)   | 0.5 | (0.3 to 0.7) | 0 | (0.0 to 0.0) |
| Finland | Both   | 5 to 9   | 4.4  | (3.1 to 5.8)   | 1.5 | (1.0 to 2.5) | 0 | (0.0 to 0.0) |
| Finland | Both   | 10 to 14 | 8.7  | (6.6 to 11.3)  | 2   | (1.4 to 2.7) | 0 | (0.0 to 0.0) |
| Finland | Both   | 15 to 19 | 14.2 | (10.7 to 18.2) | 3.9 | (2.6 to 5.3) | 0 | (0.0 to 0.0) |
| France  | Male   | 1 to 4   | 2    | (1.4 to 2.9)   | 1   | (0.5 to 1.5) | 0 | (0.0 to 0.0) |
| France  | Male   | 5 to 9   | 6    | (4.3 to 7.9)   | 1.3 | (0.9 to 1.9) | 0 | (0.0 to 0.0) |
| France  | Male   | 10 to 14 | 11.8 | (8.5 to 15.4)  | 2.5 | (1.6 to 3.5) | 0 | (0.0 to 0.0) |
| France  | Male   | 15 to 19 | 18.9 | (13.0 to 25.2) | 4.6 | (3.0 to 6.4) | 0 | (0.0 to 0.0) |
| France  | Female | 1 to 4   | 1.5  | (0.9 to 2.1)   | 1.1 | (0.6 to 2.0) | 0 | (0.0 to 0.0) |
| France  | Female | 5 to 9   | 4.6  | (3.0 to 6.3)   | 1.2 | (0.8 to 1.7) | 0 | (0.0 to 0.0) |
| France  | Female | 10 to 14 | 9.8  | (6.8 to 12.8)  | 2.2 | (1.4 to 3.1) | 0 | (0.0 to 0.0) |
| France  | Female | 15 to 19 | 16.5 | (11.3 to 22.5) | 3.9 | (2.5 to 5.6) | 0 | (0.0 to 0.0) |
| France  | Both   | 1 to 4   | 1.8  | (1.3 to 2.3)   | 1   | (0.7 to 1.5) | 0 | (0.0 to 0.0) |
| France  | Both   | 5 to 9   | 5.3  | (4.2 to 6.5)   | 1.3 | (0.9 to 1.7) | 0 | (0.0 to 0.0) |
| France  | Both   | 10 to 14 | 10.8 | (8.8 to 13.1)  | 2.3 | (1.6 to 3.2) | 0 | (0.0 to 0.0) |
| France  | Both   | 15 to 19 | 17.7 | (14.1 to 22.0) | 4.2 | (2.9 to 5.6) | 0 | (0.0 to 0.0) |
| Germany | Male   | 1 to 4   | 1.6  | (0.8 to 2.5)   | 1.4 | (0.8 to 2.3) | 0 | (0.0 to 0.0) |
| Germany | Male   | 5 to 9   | 4.8  | (2.6 to 7.2)   | 1.4 | (0.9 to 2.1) | 0 | (0.0 to 0.0) |
| Germany | Male   | 10 to 14 | 9.5  | (6.1 to 13.5)  | 2.4 | (1.6 to 3.4) | 0 | (0.0 to 0.0) |
| Germany | Male   | 15 to 19 | 15.5 | (10.0 to 21.3) | 4.3 | (2.9 to 6.2) | 0 | (0.0 to 0.0) |
| Germany | Female | 1 to 4   | 1.5  | (0.9 to 2.4)   | 1.4 | (0.8 to 2.5) | 0 | (0.0 to 0.0) |
| Germany | Female | 5 to 9   | 4.7  | (2.9 to 6.9)   | 1.5 | (1.0 to 2.2) | 0 | (0.0 to 0.0) |
| Germany | Female | 10 to 14 | 9.6  | (6.5 to 13.5)  | 2.6 | (1.7 to 3.6) | 0 | (0.0 to 0.0) |
| Germany | Female | 15 to 19 | 15.8 | (10.8 to 21.9) | 4.5 | (2.9 to 6.3) | 0 | (0.0 to 0.0) |
| Germany | Both   | 1 to 4   | 1.6  | (1.0 to 2.1)   | 1.4 | (0.9 to 2.2) | 0 | (0.0 to 0.0) |
| Germany | Both   | 5 to 9   | 4.7  | (3.3 to 6.3)   | 1.5 | (1.1 to 2.0) | 0 | (0.0 to 0.0) |



|         |        |          |      |                |     |               |     |              |
|---------|--------|----------|------|----------------|-----|---------------|-----|--------------|
| Germany | Both   | 10 to 14 | 9.6  | (7.2 to 12.0)  | 2.5 | (1.8 to 3.3)  | 0   | (0.0 to 0.0) |
| Germany | Both   | 15 to 19 | 15.6 | (12.0 to 19.8) | 4.4 | (3.1 to 5.7)  | 0   | (0.0 to 0.0) |
| Greece  | Male   | 1 to 4   | 1.4  | (0.8 to 2.1)   | 1.3 | (0.6 to 2.5)  | 0   | (0.0 to 0.0) |
| Greece  | Male   | 5 to 9   | 4.2  | (2.6 to 6.0)   | 2   | (1.3 to 2.8)  | 0   | (0.0 to 0.0) |
| Greece  | Male   | 10 to 14 | 8.6  | (5.6 to 11.9)  | 3.1 | (2.0 to 4.5)  | 0   | (0.0 to 0.0) |
| Greece  | Male   | 15 to 19 | 14.3 | (9.5 to 19.8)  | 5.9 | (3.7 to 8.7)  | 0.1 | (0.0 to 0.1) |
| Greece  | Female | 1 to 4   | 1.2  | (0.7 to 1.8)   | 2   | (0.9 to 4.2)  | 0   | (0.0 to 0.0) |
| Greece  | Female | 5 to 9   | 3.7  | (2.4 to 5.6)   | 2   | (1.2 to 3.1)  | 0   | (0.0 to 0.0) |
| Greece  | Female | 10 to 14 | 7.8  | (5.2 to 10.9)  | 3.7 | (2.4 to 5.8)  | 0   | (0.0 to 0.1) |
| Greece  | Female | 15 to 19 | 12.9 | (8.3 to 17.8)  | 5.6 | (3.6 to 8.0)  | 0   | (0.0 to 0.1) |
| Greece  | Both   | 1 to 4   | 1.3  | (0.9 to 1.8)   | 1.7 | (0.9 to 2.7)  | 0   | (0.0 to 0.0) |
| Greece  | Both   | 5 to 9   | 4    | (2.9 to 5.2)   | 2   | (1.3 to 2.7)  | 0   | (0.0 to 0.0) |
| Greece  | Both   | 10 to 14 | 8.2  | (6.2 to 10.4)  | 3.4 | (2.5 to 4.6)  | 0   | (0.0 to 0.0) |
| Greece  | Both   | 15 to 19 | 13.6 | (10.2 to 17.5) | 5.7 | (4.0 to 7.6)  | 0.1 | (0.0 to 0.1) |
| Iceland | Male   | 1 to 4   | 1.4  | (0.7 to 2.3)   | 0.3 | (0.2 to 0.5)  | 0   | (0.0 to 0.0) |
| Iceland | Male   | 5 to 9   | 4.2  | (2.3 to 6.2)   | 0.8 | (0.4 to 1.2)  | 0   | (0.0 to 0.0) |
| Iceland | Male   | 10 to 14 | 8.1  | (4.8 to 11.5)  | 1.9 | (1.1 to 2.9)  | 0   | (0.0 to 0.0) |
| Iceland | Male   | 15 to 19 | 12.8 | (7.9 to 19.3)  | 6.7 | (4.0 to 10.8) | 0.1 | (0.0 to 0.1) |
| Iceland | Female | 1 to 4   | 1.4  | (0.8 to 2.1)   | 0.6 | (0.3 to 1.0)  | 0   | (0.0 to 0.0) |
| Iceland | Female | 5 to 9   | 4.4  | (2.8 to 6.1)   | 0.9 | (0.5 to 1.3)  | 0   | (0.0 to 0.0) |
| Iceland | Female | 10 to 14 | 8.9  | (6.2 to 12.2)  | 2   | (1.2 to 2.9)  | 0   | (0.0 to 0.0) |
| Iceland | Female | 15 to 19 | 14.6 | (9.7 to 20.9)  | 8.4 | (4.4 to 18.8) | 0.1 | (0.0 to 0.2) |
| Iceland | Both   | 1 to 4   | 1.4  | (0.9 to 2.0)   | 0.4 | (0.3 to 0.7)  | 0   | (0.0 to 0.0) |
| Iceland | Both   | 5 to 9   | 4.3  | (3.0 to 5.6)   | 0.8 | (0.5 to 1.2)  | 0   | (0.0 to 0.0) |
| Iceland | Both   | 10 to 14 | 8.5  | (6.2 to 10.8)  | 2   | (1.2 to 2.7)  | 0   | (0.0 to 0.0) |
| Iceland | Both   | 15 to 19 | 13.6 | (10.1 to 18.0) | 7.5 | (4.6 to 13.5) | 0.1 | (0.0 to 0.2) |
| Ireland | Male   | 1 to 4   | 1.6  | (0.5 to 2.7)   | 0.9 | (0.5 to 1.5)  | 0   | (0.0 to 0.0) |
| Ireland | Male   | 5 to 9   | 4.6  | (1.1 to 7.4)   | 1.1 | (0.6 to 1.8)  | 0   | (0.0 to 0.0) |
| Ireland | Male   | 10 to 14 | 9.4  | (4.1 to 14.2)  | 2.1 | (1.1 to 3.2)  | 0   | (0.0 to 0.0) |
| Ireland | Male   | 15 to 19 | 15.3 | (7.7 to 23.0)  | 4.2 | (2.5 to 6.3)  | 0   | (0.0 to 0.0) |
| Ireland | Female | 1 to 4   | 1.3  | (0.6 to 2.0)   | 1.9 | (1.0 to 3.4)  | 0   | (0.0 to 0.0) |
| Ireland | Female | 5 to 9   | 4.1  | (2.0 to 6.2)   | 1.5 | (0.8 to 2.4)  | 0   | (0.0 to 0.0) |
| Ireland | Female | 10 to 14 | 8.7  | (5.3 to 12.2)  | 2.4 | (1.5 to 3.5)  | 0   | (0.0 to 0.0) |

|            |        |          |      |                |     |              |   |              |
|------------|--------|----------|------|----------------|-----|--------------|---|--------------|
| Ireland    | Female | 15 to 19 | 14.5 | (9.0 to 20.7)  | 4.2 | (2.6 to 6.0) | 0 | (0.0 to 0.0) |
| Ireland    | Both   | 1 to 4   | 1.4  | (0.9 to 2.1)   | 1.4 | (0.8 to 2.2) | 0 | (0.0 to 0.0) |
| Ireland    | Both   | 5 to 9   | 4.4  | (2.6 to 6.1)   | 1.3 | (0.9 to 1.9) | 0 | (0.0 to 0.0) |
| Ireland    | Both   | 10 to 14 | 9    | (6.0 to 12.0)  | 2.2 | (1.4 to 3.1) | 0 | (0.0 to 0.0) |
| Ireland    | Both   | 15 to 19 | 15   | (10.3 to 19.8) | 4.2 | (2.9 to 5.8) | 0 | (0.0 to 0.0) |
| Israel     | Male   | 1 to 4   | 0.8  | (0.4 to 1.3)   | 0.5 | (0.3 to 0.9) | 0 | (0.0 to 0.0) |
| Israel     | Male   | 5 to 9   | 2.5  | (1.5 to 3.7)   | 0.9 | (0.5 to 1.3) | 0 | (0.0 to 0.0) |
| Israel     | Male   | 10 to 14 | 4.9  | (3.1 to 7.2)   | 1.2 | (0.8 to 1.9) | 0 | (0.0 to 0.0) |
| Israel     | Male   | 15 to 19 | 8    | (4.9 to 11.8)  | 2.2 | (1.3 to 3.3) | 0 | (0.0 to 0.0) |
| Israel     | Female | 1 to 4   | 1.2  | (0.7 to 1.7)   | 0.9 | (0.5 to 1.4) | 0 | (0.0 to 0.0) |
| Israel     | Female | 5 to 9   | 3.7  | (2.5 to 5.2)   | 1   | (0.6 to 1.5) | 0 | (0.0 to 0.0) |
| Israel     | Female | 10 to 14 | 7.6  | (5.1 to 10.3)  | 1.7 | (1.1 to 2.5) | 0 | (0.0 to 0.0) |
| Israel     | Female | 15 to 19 | 12.5 | (8.2 to 17.0)  | 2.7 | (1.6 to 4.0) | 0 | (0.0 to 0.0) |
| Israel     | Both   | 1 to 4   | 1    | (0.7 to 1.3)   | 0.7 | (0.4 to 1.0) | 0 | (0.0 to 0.0) |
| Israel     | Both   | 5 to 9   | 3.1  | (2.2 to 3.9)   | 1   | (0.6 to 1.3) | 0 | (0.0 to 0.0) |
| Israel     | Both   | 10 to 14 | 6.2  | (4.6 to 7.9)   | 1.5 | (1.0 to 2.0) | 0 | (0.0 to 0.0) |
| Israel     | Both   | 15 to 19 | 10.2 | (7.6 to 12.8)  | 2.4 | (1.6 to 3.4) | 0 | (0.0 to 0.0) |
| Italy      | Male   | 1 to 4   | 1.3  | (0.8 to 2.0)   | 1.1 | (0.5 to 2.0) | 0 | (0.0 to 0.0) |
| Italy      | Male   | 5 to 9   | 3.7  | (2.3 to 5.2)   | 1.4 | (0.9 to 2.0) | 0 | (0.0 to 0.0) |
| Italy      | Male   | 10 to 14 | 6.9  | (4.6 to 9.6)   | 2.6 | (1.7 to 3.8) | 0 | (0.0 to 0.0) |
| Italy      | Male   | 15 to 19 | 10.8 | (7.4 to 15.0)  | 4.8 | (3.1 to 7.2) | 0 | (0.0 to 0.1) |
| Italy      | Female | 1 to 4   | 0.9  | (0.5 to 1.3)   | 2   | (0.9 to 4.7) | 0 | (0.0 to 0.1) |
| Italy      | Female | 5 to 9   | 2.6  | (1.7 to 3.7)   | 1.9 | (1.1 to 3.8) | 0 | (0.0 to 0.0) |
| Italy      | Female | 10 to 14 | 5.4  | (3.7 to 7.5)   | 2.7 | (1.7 to 4.3) | 0 | (0.0 to 0.0) |
| Italy      | Female | 15 to 19 | 9    | (6.2 to 12.8)  | 4.8 | (3.0 to 7.4) | 0 | (0.0 to 0.1) |
| Italy      | Both   | 1 to 4   | 1.1  | (0.8 to 1.5)   | 1.5 | (0.8 to 3.0) | 0 | (0.0 to 0.0) |
| Italy      | Both   | 5 to 9   | 3.2  | (2.4 to 4.1)   | 1.6 | (1.1 to 2.7) | 0 | (0.0 to 0.0) |
| Italy      | Both   | 10 to 14 | 6.2  | (4.8 to 7.8)   | 2.6 | (1.9 to 3.7) | 0 | (0.0 to 0.0) |
| Italy      | Both   | 15 to 19 | 9.9  | (7.6 to 12.8)  | 4.8 | (3.4 to 6.7) | 0 | (0.0 to 0.1) |
| Luxembourg | Male   | 1 to 4   | 1.5  | (0.7 to 2.5)   | 2   | (0.8 to 4.4) | 0 | (0.0 to 0.0) |
| Luxembourg | Male   | 5 to 9   | 4.5  | (2.2 to 7.2)   | 1.1 | (0.5 to 1.8) | 0 | (0.0 to 0.0) |
| Luxembourg | Male   | 10 to 14 | 9.2  | (5.5 to 14.0)  | 2.5 | (1.6 to 3.7) | 0 | (0.0 to 0.0) |
| Luxembourg | Male   | 15 to 19 | 15   | (8.8 to 22.8)  | 3.3 | (1.9 to 5.0) | 0 | (0.0 to 0.0) |

|             |        |          |      |                |     |               |     |              |
|-------------|--------|----------|------|----------------|-----|---------------|-----|--------------|
| Luxembourg  | Female | 1 to 4   | 1.4  | (0.6 to 2.3)   | 1.1 | (0.4 to 1.9)  | 0   | (0.0 to 0.0) |
| Luxembourg  | Female | 5 to 9   | 4.3  | (2.2 to 7.1)   | 1.5 | (1.0 to 2.3)  | 0   | (0.0 to 0.0) |
| Luxembourg  | Female | 10 to 14 | 9.1  | (5.6 to 14.2)  | 5.1 | (3.2 to 8.2)  | 0   | (0.0 to 0.1) |
| Luxembourg  | Female | 15 to 19 | 15.2 | (9.5 to 22.7)  | 6.8 | (4.0 to 11.2) | 0.1 | (0.0 to 0.1) |
| Luxembourg  | Both   | 1 to 4   | 1.5  | (0.9 to 2.2)   | 1.6 | (0.9 to 3.0)  | 0   | (0.0 to 0.0) |
| Luxembourg  | Both   | 5 to 9   | 4.4  | (2.9 to 6.5)   | 1.3 | (0.8 to 1.9)  | 0   | (0.0 to 0.0) |
| Luxembourg  | Both   | 10 to 14 | 9.1  | (6.6 to 12.8)  | 3.7 | (2.6 to 5.6)  | 0   | (0.0 to 0.1) |
| Luxembourg  | Both   | 15 to 19 | 15.1 | (10.5 to 21.0) | 5   | (3.2 to 7.3)  | 0   | (0.0 to 0.1) |
| Malta       | Male   | 1 to 4   | 1.5  | (0.5 to 2.5)   | 1.1 | (0.5 to 1.8)  | 0   | (0.0 to 0.0) |
| Malta       | Male   | 5 to 9   | 4.5  | (1.4 to 7.4)   | 1.8 | (0.8 to 2.8)  | 0   | (0.0 to 0.0) |
| Malta       | Male   | 10 to 14 | 9.3  | (5.5 to 14.2)  | 2.8 | (1.8 to 4.0)  | 0   | (0.0 to 0.0) |
| Malta       | Male   | 15 to 19 | 15.7 | (9.1 to 23.6)  | 4.2 | (2.5 to 6.3)  | 0   | (0.0 to 0.0) |
| Malta       | Female | 1 to 4   | 1.4  | (0.6 to 2.2)   | 3.5 | (1.6 to 8.5)  | 0   | (0.0 to 0.1) |
| Malta       | Female | 5 to 9   | 4.4  | (2.2 to 6.5)   | 1.9 | (0.9 to 4.0)  | 0   | (0.0 to 0.0) |
| Malta       | Female | 10 to 14 | 9.1  | (5.9 to 12.9)  | 2.8 | (1.6 to 4.0)  | 0   | (0.0 to 0.0) |
| Malta       | Female | 15 to 19 | 15   | (9.8 to 21.5)  | 3.5 | (1.9 to 5.4)  | 0   | (0.0 to 0.0) |
| Malta       | Both   | 1 to 4   | 1.4  | (0.9 to 2.2)   | 2.2 | (1.2 to 4.8)  | 0   | (0.0 to 0.1) |
| Malta       | Both   | 5 to 9   | 4.4  | (2.5 to 6.1)   | 1.8 | (1.0 to 2.8)  | 0   | (0.0 to 0.0) |
| Malta       | Both   | 10 to 14 | 9.2  | (6.6 to 12.0)  | 2.8 | (1.9 to 3.7)  | 0   | (0.0 to 0.0) |
| Malta       | Both   | 15 to 19 | 15.4 | (11.0 to 20.0) | 3.9 | (2.4 to 5.5)  | 0   | (0.0 to 0.0) |
| Netherlands | Male   | 1 to 4   | 0.9  | (0.4 to 1.5)   | 0.8 | (0.4 to 1.4)  | 0   | (0.0 to 0.0) |
| Netherlands | Male   | 5 to 9   | 2.7  | (1.5 to 4.5)   | 0.7 | (0.4 to 1.1)  | 0   | (0.0 to 0.0) |
| Netherlands | Male   | 10 to 14 | 5.1  | (3.3 to 8.2)   | 1.6 | (1.0 to 2.3)  | 0   | (0.0 to 0.0) |
| Netherlands | Male   | 15 to 19 | 8.1  | (5.1 to 12.0)  | 2.6 | (1.6 to 3.8)  | 0   | (0.0 to 0.0) |
| Netherlands | Female | 1 to 4   | 0.9  | (0.6 to 1.4)   | 2.3 | (1.1 to 4.1)  | 0   | (0.0 to 0.0) |
| Netherlands | Female | 5 to 9   | 2.9  | (1.8 to 4.4)   | 0.9 | (0.5 to 1.4)  | 0   | (0.0 to 0.0) |
| Netherlands | Female | 10 to 14 | 5.9  | (3.8 to 8.6)   | 1.7 | (1.0 to 2.5)  | 0   | (0.0 to 0.0) |
| Netherlands | Female | 15 to 19 | 9.9  | (6.2 to 14.1)  | 3.1 | (1.9 to 4.5)  | 0   | (0.0 to 0.0) |
| Netherlands | Both   | 1 to 4   | 0.9  | (0.6 to 1.3)   | 1.5 | (0.9 to 2.5)  | 0   | (0.0 to 0.0) |
| Netherlands | Both   | 5 to 9   | 2.8  | (1.9 to 3.8)   | 0.8 | (0.5 to 1.2)  | 0   | (0.0 to 0.0) |
| Netherlands | Both   | 10 to 14 | 5.5  | (4.0 to 7.6)   | 1.6 | (1.1 to 2.3)  | 0   | (0.0 to 0.0) |
| Netherlands | Both   | 15 to 19 | 8.9  | (6.5 to 11.8)  | 2.9 | (2.0 to 3.9)  | 0   | (0.0 to 0.0) |
| Norway      | Male   | 1 to 4   | 1.6  | (0.9 to 2.5)   | 0.5 | (0.2 to 0.8)  | 0   | (0.0 to 0.0) |

|          |        |          |      |                |     |              |     |              |
|----------|--------|----------|------|----------------|-----|--------------|-----|--------------|
| Norway   | Male   | 5 to 9   | 4.8  | (3.1 to 7.0)   | 1   | (0.6 to 1.5) | 0   | (0.0 to 0.0) |
| Norway   | Male   | 10 to 14 | 9.6  | (6.5 to 13.1)  | 1.9 | (1.1 to 2.8) | 0   | (0.0 to 0.0) |
| Norway   | Male   | 15 to 19 | 15.7 | (10.7 to 20.9) | 3.3 | (2.1 to 4.8) | 0   | (0.0 to 0.0) |
| Norway   | Female | 1 to 4   | 1.3  | (0.8 to 2.1)   | 0.7 | (0.4 to 1.1) | 0   | (0.0 to 0.0) |
| Norway   | Female | 5 to 9   | 4.3  | (2.7 to 6.1)   | 1.2 | (0.7 to 1.8) | 0   | (0.0 to 0.0) |
| Norway   | Female | 10 to 14 | 9.2  | (6.2 to 12.1)  | 1.9 | (1.2 to 2.8) | 0   | (0.0 to 0.0) |
| Norway   | Female | 15 to 19 | 15.4 | (10.2 to 21.0) | 3.7 | (2.4 to 5.3) | 0   | (0.0 to 0.0) |
| Norway   | Both   | 1 to 4   | 1.5  | (1.0 to 2.0)   | 0.6 | (0.4 to 0.9) | 0   | (0.0 to 0.0) |
| Norway   | Both   | 5 to 9   | 4.6  | (3.3 to 5.9)   | 1.1 | (0.7 to 1.5) | 0   | (0.0 to 0.0) |
| Norway   | Both   | 10 to 14 | 9.4  | (7.0 to 11.6)  | 1.9 | (1.2 to 2.6) | 0   | (0.0 to 0.0) |
| Norway   | Both   | 15 to 19 | 15.5 | (11.7 to 19.3) | 3.5 | (2.4 to 4.8) | 0   | (0.0 to 0.0) |
| Portugal | Male   | 1 to 4   | 1.7  | (0.7 to 2.6)   | 0.8 | (0.4 to 1.2) | 0   | (0.0 to 0.0) |
| Portugal | Male   | 5 to 9   | 4.9  | (2.1 to 7.5)   | 1.3 | (0.8 to 2.0) | 0   | (0.0 to 0.0) |
| Portugal | Male   | 10 to 14 | 9.9  | (5.7 to 14.6)  | 2.5 | (1.6 to 3.7) | 0   | (0.0 to 0.0) |
| Portugal | Male   | 15 to 19 | 16   | (9.2 to 23.4)  | 5.1 | (3.3 to 7.8) | 0   | (0.0 to 0.1) |
| Portugal | Female | 1 to 4   | 1.9  | (1.1 to 2.8)   | 0.6 | (0.4 to 0.9) | 0   | (0.0 to 0.0) |
| Portugal | Female | 5 to 9   | 5.5  | (3.3 to 8.3)   | 1.4 | (0.9 to 2.1) | 0   | (0.0 to 0.0) |
| Portugal | Female | 10 to 14 | 11.2 | (7.0 to 16.3)  | 2.8 | (1.8 to 4.3) | 0   | (0.0 to 0.0) |
| Portugal | Female | 15 to 19 | 18.3 | (11.1 to 26.8) | 4.8 | (3.0 to 7.1) | 0   | (0.0 to 0.0) |
| Portugal | Both   | 1 to 4   | 1.8  | (1.1 to 2.4)   | 0.7 | (0.4 to 1.0) | 0   | (0.0 to 0.0) |
| Portugal | Both   | 5 to 9   | 5.2  | (3.4 to 7.0)   | 1.4 | (0.9 to 1.9) | 0   | (0.0 to 0.0) |
| Portugal | Both   | 10 to 14 | 10.5 | (7.3 to 13.6)  | 2.7 | (1.8 to 3.8) | 0   | (0.0 to 0.0) |
| Portugal | Both   | 15 to 19 | 17.1 | (11.7 to 22.6) | 5   | (3.4 to 6.9) | 0   | (0.0 to 0.0) |
| Spain    | Male   | 1 to 4   | 1.8  | (1.0 to 3.1)   | 1.4 | (0.7 to 2.5) | 0   | (0.0 to 0.0) |
| Spain    | Male   | 5 to 9   | 5    | (2.9 to 7.5)   | 1.8 | (1.2 to 2.7) | 0   | (0.0 to 0.0) |
| Spain    | Male   | 10 to 14 | 8.9  | (5.8 to 12.7)  | 3.3 | (2.1 to 4.8) | 0   | (0.0 to 0.0) |
| Spain    | Male   | 15 to 19 | 13.3 | (8.9 to 18.6)  | 5.8 | (3.7 to 9.1) | 0.1 | (0.0 to 0.1) |
| Spain    | Female | 1 to 4   | 1.6  | (0.9 to 2.3)   | 1.5 | (0.8 to 2.5) | 0   | (0.0 to 0.0) |
| Spain    | Female | 5 to 9   | 4.7  | (3.0 to 6.6)   | 1.8 | (1.2 to 2.9) | 0   | (0.0 to 0.0) |
| Spain    | Female | 10 to 14 | 9.3  | (6.4 to 12.5)  | 3.4 | (2.3 to 5.4) | 0   | (0.0 to 0.1) |
| Spain    | Female | 15 to 19 | 14.8 | (9.8 to 20.0)  | 5.8 | (3.9 to 8.4) | 0   | (0.0 to 0.1) |
| Spain    | Both   | 1 to 4   | 1.7  | (1.2 to 2.5)   | 1.5 | (0.9 to 2.3) | 0   | (0.0 to 0.0) |
| Spain    | Both   | 5 to 9   | 4.9  | (3.3 to 6.6)   | 1.8 | (1.3 to 2.6) | 0   | (0.0 to 0.0) |

|                |        |          |      |                |     |              |     |              |
|----------------|--------|----------|------|----------------|-----|--------------|-----|--------------|
| Spain          | Both   | 10 to 14 | 9.1  | (6.7 to 11.6)  | 3.3 | (2.4 to 4.7) | 0   | (0.0 to 0.0) |
| Spain          | Both   | 15 to 19 | 14   | (10.6 to 17.8) | 5.8 | (4.2 to 8.0) | 0.1 | (0.0 to 0.1) |
| Sweden         | Male   | 1 to 4   | 1.6  | (0.9 to 2.6)   | 0.6 | (0.4 to 1.1) | 0   | (0.0 to 0.0) |
| Sweden         | Male   | 5 to 9   | 4.6  | (2.9 to 6.9)   | 1.1 | (0.7 to 1.7) | 0   | (0.0 to 0.0) |
| Sweden         | Male   | 10 to 14 | 8.8  | (5.9 to 12.5)  | 2.2 | (1.4 to 3.2) | 0   | (0.0 to 0.0) |
| Sweden         | Male   | 15 to 19 | 13.6 | (9.0 to 18.5)  | 3.3 | (2.1 to 4.8) | 0   | (0.0 to 0.0) |
| Sweden         | Female | 1 to 4   | 1.3  | (0.7 to 2.3)   | 0.5 | (0.3 to 0.7) | 0   | (0.0 to 0.0) |
| Sweden         | Female | 5 to 9   | 4.2  | (2.3 to 6.5)   | 0.9 | (0.6 to 1.4) | 0   | (0.0 to 0.0) |
| Sweden         | Female | 10 to 14 | 8.5  | (5.4 to 12.4)  | 2.3 | (1.4 to 3.4) | 0   | (0.0 to 0.0) |
| Sweden         | Female | 15 to 19 | 14   | (9.0 to 21.2)  | 3.4 | (2.1 to 5.2) | 0   | (0.0 to 0.0) |
| Sweden         | Both   | 1 to 4   | 1.5  | (1.0 to 2.0)   | 0.6 | (0.4 to 0.8) | 0   | (0.0 to 0.0) |
| Sweden         | Both   | 5 to 9   | 4.4  | (3.2 to 5.9)   | 1   | (0.7 to 1.4) | 0   | (0.0 to 0.0) |
| Sweden         | Both   | 10 to 14 | 8.6  | (6.7 to 11.2)  | 2.2 | (1.6 to 3.0) | 0   | (0.0 to 0.0) |
| Sweden         | Both   | 15 to 19 | 13.8 | (10.6 to 18.2) | 3.3 | (2.2 to 4.6) | 0   | (0.0 to 0.0) |
| Switzerland    | Male   | 1 to 4   | 1.5  | (0.5 to 2.6)   | 0.5 | (0.3 to 0.9) | 0   | (0.0 to 0.0) |
| Switzerland    | Male   | 5 to 9   | 4.5  | (1.6 to 7.3)   | 1   | (0.5 to 1.7) | 0   | (0.0 to 0.0) |
| Switzerland    | Male   | 10 to 14 | 9.2  | (4.7 to 13.8)  | 1.7 | (0.9 to 2.8) | 0   | (0.0 to 0.0) |
| Switzerland    | Male   | 15 to 19 | 15.1 | (7.4 to 22.4)  | 3.2 | (1.8 to 5.0) | 0   | (0.0 to 0.0) |
| Switzerland    | Female | 1 to 4   | 1.3  | (0.6 to 2.1)   | 0.7 | (0.4 to 1.1) | 0   | (0.0 to 0.0) |
| Switzerland    | Female | 5 to 9   | 4.2  | (2.1 to 6.6)   | 1   | (0.5 to 1.5) | 0   | (0.0 to 0.0) |
| Switzerland    | Female | 10 to 14 | 8.7  | (4.9 to 12.4)  | 2   | (1.2 to 3.0) | 0   | (0.0 to 0.0) |
| Switzerland    | Female | 15 to 19 | 14.4 | (7.1 to 21.2)  | 3.6 | (2.2 to 5.5) | 0   | (0.0 to 0.0) |
| Switzerland    | Both   | 1 to 4   | 1.4  | (0.9 to 2.1)   | 0.6 | (0.4 to 0.9) | 0   | (0.0 to 0.0) |
| Switzerland    | Both   | 5 to 9   | 4.4  | (2.5 to 6.2)   | 1   | (0.6 to 1.4) | 0   | (0.0 to 0.0) |
| Switzerland    | Both   | 10 to 14 | 8.9  | (5.9 to 11.9)  | 1.9 | (1.2 to 2.7) | 0   | (0.0 to 0.0) |
| Switzerland    | Both   | 15 to 19 | 14.7 | (9.7 to 19.3)  | 3.4 | (2.3 to 4.8) | 0   | (0.0 to 0.0) |
| United Kingdom | Male   | 1 to 4   | 1.5  | (1.3 to 1.8)   | 2.1 | (1.2 to 3.3) | 0   | (0.0 to 0.0) |
| United Kingdom | Male   | 5 to 9   | 4.5  | (3.7 to 5.2)   | 1.4 | (1.0 to 1.9) | 0   | (0.0 to 0.0) |
| United Kingdom | Male   | 10 to 14 | 9.1  | (7.9 to 10.3)  | 2.3 | (1.6 to 3.1) | 0   | (0.0 to 0.0) |
| United Kingdom | Male   | 15 to 19 | 15.1 | (12.9 to 17.1) | 4.4 | (3.1 to 5.8) | 0   | (0.0 to 0.0) |
| United Kingdom | Female | 1 to 4   | 1.3  | (1.1 to 1.5)   | 1.8 | (1.1 to 2.8) | 0   | (0.0 to 0.0) |
| United Kingdom | Female | 5 to 9   | 4.2  | (3.6 to 4.8)   | 1.4 | (1.0 to 1.9) | 0   | (0.0 to 0.0) |
| United Kingdom | Female | 10 to 14 | 8.9  | (7.9 to 10.1)  | 2.4 | (1.7 to 3.1) | 0   | (0.0 to 0.0) |

|                |        |          |     |                |      |                |     |              |
|----------------|--------|----------|-----|----------------|------|----------------|-----|--------------|
| United Kingdom | Female | 15 to 19 | 15  | (13.4 to 16.8) | 4.5  | (3.4 to 5.8)   | 0   | (0.0 to 0.0) |
| United Kingdom | Both   | 1 to 4   | 1.4 | (1.3 to 1.5)   | 2    | (1.3 to 2.8)   | 0   | (0.0 to 0.0) |
| United Kingdom | Both   | 5 to 9   | 4.3 | (3.9 to 4.8)   | 1.4  | (1.1 to 1.8)   | 0   | (0.0 to 0.0) |
| United Kingdom | Both   | 10 to 14 | 9   | (8.3 to 9.7)   | 2.4  | (1.8 to 3.0)   | 0   | (0.0 to 0.0) |
| United Kingdom | Both   | 15 to 19 | 15  | (13.8 to 16.4) | 4.5  | (3.4 to 5.7)   | 0   | (0.0 to 0.0) |
| Argentina      | Male   | 1 to 4   | 0.7 | (0.4 to 1.2)   | 9.4  | (4.7 to 18.5)  | 0.1 | (0.1 to 0.2) |
| Argentina      | Male   | 5 to 9   | 2.2 | (1.4 to 3.4)   | 7.1  | (4.1 to 12.3)  | 0.1 | (0.0 to 0.2) |
| Argentina      | Male   | 10 to 14 | 4.5 | (3.0 to 6.5)   | 8.5  | (5.1 to 14.3)  | 0.1 | (0.1 to 0.2) |
| Argentina      | Male   | 15 to 19 | 7.2 | (4.7 to 10.8)  | 24.3 | (14.4 to 42.7) | 0.3 | (0.2 to 0.6) |
| Argentina      | Female | 1 to 4   | 0.6 | (0.3 to 1.0)   | 7.6  | (3.9 to 15.6)  | 0.1 | (0.0 to 0.2) |
| Argentina      | Female | 5 to 9   | 1.9 | (1.0 to 2.8)   | 6.3  | (3.6 to 12.9)  | 0.1 | (0.0 to 0.2) |
| Argentina      | Female | 10 to 14 | 3.7 | (2.4 to 5.3)   | 7.7  | (4.6 to 15.5)  | 0.1 | (0.1 to 0.2) |
| Argentina      | Female | 15 to 19 | 5.9 | (4.1 to 8.3)   | 13.5 | (8.5 to 24.8)  | 0.2 | (0.1 to 0.3) |
| Argentina      | Both   | 1 to 4   | 0.7 | (0.4 to 1.0)   | 8.5  | (4.7 to 15.4)  | 0.1 | (0.1 to 0.2) |
| Argentina      | Both   | 5 to 9   | 2   | (1.4 to 2.8)   | 6.7  | (4.2 to 11.4)  | 0.1 | (0.0 to 0.1) |
| Argentina      | Both   | 10 to 14 | 4.1 | (3.1 to 5.4)   | 8.1  | (5.3 to 13.7)  | 0.1 | (0.1 to 0.2) |
| Argentina      | Both   | 15 to 19 | 6.6 | (4.8 to 8.7)   | 19   | (12.6 to 31.4) | 0.3 | (0.2 to 0.4) |
| Chile          | Male   | 1 to 4   | 0.7 | (0.4 to 1.2)   | 2.8  | (1.1 to 5.9)   | 0   | (0.0 to 0.1) |
| Chile          | Male   | 5 to 9   | 2.2 | (1.3 to 3.4)   | 2.8  | (1.6 to 4.5)   | 0   | (0.0 to 0.1) |
| Chile          | Male   | 10 to 14 | 4.3 | (2.8 to 6.3)   | 4.5  | (2.6 to 7.6)   | 0.1 | (0.0 to 0.1) |
| Chile          | Male   | 15 to 19 | 6.9 | (4.3 to 9.9)   | 14.5 | (8.4 to 23.9)  | 0.2 | (0.1 to 0.3) |
| Chile          | Female | 1 to 4   | 0.6 | (0.3 to 0.9)   | 1.8  | (0.8 to 3.3)   | 0   | (0.0 to 0.0) |
| Chile          | Female | 5 to 9   | 1.8 | (1.0 to 2.6)   | 1.9  | (1.0 to 3.5)   | 0   | (0.0 to 0.0) |
| Chile          | Female | 10 to 14 | 3.6 | (2.3 to 5.1)   | 3.3  | (1.9 to 5.7)   | 0   | (0.0 to 0.1) |
| Chile          | Female | 15 to 19 | 5.9 | (3.9 to 8.5)   | 8.5  | (5.2 to 14.3)  | 0.1 | (0.1 to 0.2) |
| Chile          | Both   | 1 to 4   | 0.7 | (0.4 to 0.9)   | 2.3  | (1.1 to 4.4)   | 0   | (0.0 to 0.1) |
| Chile          | Both   | 5 to 9   | 2   | (1.4 to 2.7)   | 2.3  | (1.5 to 3.7)   | 0   | (0.0 to 0.0) |
| Chile          | Both   | 10 to 14 | 4   | (3.0 to 5.2)   | 3.9  | (2.6 to 5.9)   | 0   | (0.0 to 0.1) |
| Chile          | Both   | 15 to 19 | 6.4 | (4.7 to 8.5)   | 11.5 | (7.8 to 17.2)  | 0.2 | (0.1 to 0.2) |
| Uruguay        | Male   | 1 to 4   | 0.7 | (0.3 to 1.2)   | 3.4  | (1.4 to 6.7)   | 0   | (0.0 to 0.1) |
| Uruguay        | Male   | 5 to 9   | 2.2 | (1.1 to 3.4)   | 4.4  | (2.2 to 8.4)   | 0.1 | (0.0 to 0.1) |
| Uruguay        | Male   | 10 to 14 | 4.5 | (2.8 to 6.6)   | 7.2  | (4.2 to 12.3)  | 0.1 | (0.0 to 0.2) |
| Uruguay        | Male   | 15 to 19 | 7.3 | (4.6 to 10.5)  | 23.5 | (13.3 to 40.6) | 0.3 | (0.2 to 0.6) |

|                     |        |          |      |                |      |                |     |              |
|---------------------|--------|----------|------|----------------|------|----------------|-----|--------------|
| Uruguay             | Female | 1 to 4   | 0.6  | (0.4 to 0.9)   | 3.9  | (1.8 to 8.6)   | 0   | (0.0 to 0.1) |
| Uruguay             | Female | 5 to 9   | 1.9  | (1.0 to 2.7)   | 4.9  | (2.7 to 10.0)  | 0.1 | (0.0 to 0.1) |
| Uruguay             | Female | 10 to 14 | 3.7  | (2.3 to 5.3)   | 6.8  | (3.8 to 13.2)  | 0.1 | (0.0 to 0.2) |
| Uruguay             | Female | 15 to 19 | 6.1  | (3.8 to 8.6)   | 12.2 | (7.5 to 21.5)  | 0.2 | (0.1 to 0.3) |
| Uruguay             | Both   | 1 to 4   | 0.7  | (0.4 to 1.0)   | 3.7  | (1.9 to 7.0)   | 0   | (0.0 to 0.1) |
| Uruguay             | Both   | 5 to 9   | 2.1  | (1.3 to 2.8)   | 4.7  | (2.7 to 8.2)   | 0.1 | (0.0 to 0.1) |
| Uruguay             | Both   | 10 to 14 | 4.1  | (3.0 to 5.3)   | 7    | (4.5 to 11.9)  | 0.1 | (0.1 to 0.2) |
| Uruguay             | Both   | 15 to 19 | 6.7  | (5.0 to 8.7)   | 18   | (11.8 to 28.2) | 0.2 | (0.2 to 0.4) |
| Canada              | Male   | 1 to 4   | 2.2  | (1.3 to 3.3)   | 1.5  | (0.8 to 2.5)   | 0   | (0.0 to 0.0) |
| Canada              | Male   | 5 to 9   | 7.3  | (4.7 to 10.2)  | 1.6  | (1.1 to 2.4)   | 0   | (0.0 to 0.0) |
| Canada              | Male   | 10 to 14 | 15.4 | (9.9 to 21.5)  | 3    | (1.8 to 4.4)   | 0   | (0.0 to 0.0) |
| Canada              | Male   | 15 to 19 | 26.1 | (16.1 to 37.8) | 5.2  | (3.1 to 8.0)   | 0   | (0.0 to 0.0) |
| Canada              | Female | 1 to 4   | 1.6  | (0.9 to 2.4)   | 1.2  | (0.7 to 2.0)   | 0   | (0.0 to 0.0) |
| Canada              | Female | 5 to 9   | 5.2  | (3.3 to 7.8)   | 1.4  | (0.9 to 2.1)   | 0   | (0.0 to 0.0) |
| Canada              | Female | 10 to 14 | 11.6 | (7.7 to 16.9)  | 2.4  | (1.5 to 3.7)   | 0   | (0.0 to 0.0) |
| Canada              | Female | 15 to 19 | 20.7 | (13.5 to 30.1) | 5    | (3.2 to 7.6)   | 0   | (0.0 to 0.0) |
| Canada              | Both   | 1 to 4   | 1.9  | (1.3 to 2.6)   | 1.4  | (0.8 to 2.1)   | 0   | (0.0 to 0.0) |
| Canada              | Both   | 5 to 9   | 6.3  | (4.6 to 8.2)   | 1.5  | (1.1 to 2.1)   | 0   | (0.0 to 0.0) |
| Canada              | Both   | 10 to 14 | 13.6 | (10.1 to 17.7) | 2.7  | (1.8 to 3.8)   | 0   | (0.0 to 0.0) |
| Canada              | Both   | 15 to 19 | 23.4 | (17.0 to 31.1) | 5.1  | (3.4 to 7.2)   | 0   | (0.0 to 0.0) |
| United States       | Male   | 1 to 4   | 4.7  | (3.3 to 6.2)   | 5.4  | (2.7 to 9.8)   | 0.1 | (0.0 to 0.1) |
| United States       | Male   | 5 to 9   | 17.6 | (13.1 to 22.2) | 4.3  | (2.8 to 6.0)   | 0   | (0.0 to 0.0) |
| United States       | Male   | 10 to 14 | 40.6 | (31.8 to 50.6) | 7.9  | (4.6 to 11.9)  | 0   | (0.0 to 0.0) |
| United States       | Male   | 15 to 19 | 72.3 | (55.2 to 90.0) | 14.1 | (7.6 to 23.2)  | 0   | (0.0 to 0.1) |
| United States       | Female | 1 to 4   | 3.3  | (1.9 to 4.5)   | 5.1  | (2.8 to 8.4)   | 0.1 | (0.0 to 0.1) |
| United States       | Female | 5 to 9   | 13.4 | (8.6 to 17.6)  | 3.7  | (2.4 to 5.2)   | 0   | (0.0 to 0.0) |
| United States       | Female | 10 to 14 | 33.1 | (23.9 to 41.5) | 6.6  | (3.8 to 10.5)  | 0   | (0.0 to 0.0) |
| United States       | Female | 15 to 19 | 62.1 | (45.5 to 78.4) | 12.6 | (6.8 to 20.6)  | 0   | (0.0 to 0.1) |
| United States       | Both   | 1 to 4   | 4    | (3.1 to 5.0)   | 5.2  | (3.2 to 8.4)   | 0.1 | (0.0 to 0.1) |
| United States       | Both   | 5 to 9   | 15.5 | (12.4 to 18.6) | 4    | (2.9 to 5.3)   | 0   | (0.0 to 0.0) |
| United States       | Both   | 10 to 14 | 36.9 | (31.4 to 43.4) | 7.3  | (4.7 to 10.6)  | 0   | (0.0 to 0.0) |
| United States       | Both   | 15 to 19 | 67.3 | (57.0 to 80.1) | 13.4 | (8.3 to 20.3)  | 0   | (0.0 to 0.1) |
| Antigua and Barbuda | Male   | 1 to 4   | 0.5  | (0.3 to 0.9)   | 24.9 | (8.8 to 61.1)  | 0.3 | (0.1 to 0.7) |

|                     |        |          |     |               |      |                |     |              |
|---------------------|--------|----------|-----|---------------|------|----------------|-----|--------------|
| Antigua and Barbuda | Male   | 5 to 9   | 1.7 | (1.0 to 2.7)  | 15.2 | (7.4 to 27.9)  | 0.2 | (0.1 to 0.3) |
| Antigua and Barbuda | Male   | 10 to 14 | 3.7 | (2.2 to 5.5)  | 21.8 | (10.7 to 38.1) | 0.3 | (0.1 to 0.5) |
| Antigua and Barbuda | Male   | 15 to 19 | 6.3 | (3.5 to 9.5)  | 46.1 | (24.9 to 74.7) | 0.7 | (0.3 to 1.1) |
| Antigua and Barbuda | Female | 1 to 4   | 0.3 | (0.1 to 0.5)  | 14.5 | (5.6 to 32.6)  | 0.2 | (0.1 to 0.4) |
| Antigua and Barbuda | Female | 5 to 9   | 1   | (0.4 to 1.6)  | 14.2 | (6.8 to 26.6)  | 0.2 | (0.1 to 0.3) |
| Antigua and Barbuda | Female | 10 to 14 | 2.2 | (1.1 to 3.4)  | 16.6 | (8.1 to 31.1)  | 0.2 | (0.1 to 0.4) |
| Antigua and Barbuda | Female | 15 to 19 | 4.1 | (2.3 to 6.4)  | 21.9 | (12.6 to 38.5) | 0.3 | (0.2 to 0.5) |
| Antigua and Barbuda | Both   | 1 to 4   | 0.4 | (0.3 to 0.6)  | 19.8 | (7.8 to 44.0)  | 0.2 | (0.1 to 0.5) |
| Antigua and Barbuda | Both   | 5 to 9   | 1.3 | (0.9 to 1.9)  | 14.7 | (7.9 to 25.5)  | 0.2 | (0.1 to 0.3) |
| Antigua and Barbuda | Both   | 10 to 14 | 3   | (2.1 to 4.0)  | 19.2 | (10.9 to 31.4) | 0.3 | (0.1 to 0.4) |
| Antigua and Barbuda | Both   | 15 to 19 | 5.2 | (3.4 to 7.2)  | 33.9 | (21.3 to 50.4) | 0.5 | (0.3 to 0.7) |
| The Bahamas         | Male   | 1 to 4   | 0.5 | (0.2 to 0.9)  | 20.3 | (7.2 to 45.5)  | 0.2 | (0.1 to 0.5) |
| The Bahamas         | Male   | 5 to 9   | 1.7 | (0.8 to 2.8)  | 14.7 | (7.0 to 27.3)  | 0.2 | (0.1 to 0.3) |
| The Bahamas         | Male   | 10 to 14 | 3.8 | (2.2 to 5.6)  | 19.7 | (10.2 to 35.8) | 0.3 | (0.1 to 0.5) |
| The Bahamas         | Male   | 15 to 19 | 6.6 | (3.5 to 9.7)  | 43.4 | (23.4 to 74.0) | 0.6 | (0.3 to 1.1) |
| The Bahamas         | Female | 1 to 4   | 0.3 | (0.1 to 0.5)  | 8.6  | (3.0 to 20.3)  | 0.1 | (0.0 to 0.2) |
| The Bahamas         | Female | 5 to 9   | 1   | (0.5 to 1.6)  | 15.9 | (8.0 to 28.6)  | 0.2 | (0.1 to 0.4) |
| The Bahamas         | Female | 10 to 14 | 2.3 | (1.3 to 3.5)  | 17.8 | (9.1 to 30.7)  | 0.2 | (0.1 to 0.4) |
| The Bahamas         | Female | 15 to 19 | 4.2 | (2.2 to 6.3)  | 24.2 | (13.5 to 39.6) | 0.3 | (0.2 to 0.6) |
| The Bahamas         | Both   | 1 to 4   | 0.4 | (0.2 to 0.6)  | 14.6 | (5.7 to 32.2)  | 0.2 | (0.1 to 0.4) |
| The Bahamas         | Both   | 5 to 9   | 1.3 | (0.8 to 2.0)  | 15.3 | (8.4 to 25.9)  | 0.2 | (0.1 to 0.3) |
| The Bahamas         | Both   | 10 to 14 | 3   | (2.0 to 4.1)  | 18.7 | (10.8 to 30.2) | 0.2 | (0.1 to 0.4) |
| The Bahamas         | Both   | 15 to 19 | 5.4 | (3.6 to 7.2)  | 33.9 | (21.7 to 50.0) | 0.5 | (0.3 to 0.7) |
| Barbados            | Male   | 1 to 4   | 0.5 | (0.3 to 0.8)  | 13.5 | (4.9 to 31.1)  | 0.2 | (0.1 to 0.4) |
| Barbados            | Male   | 5 to 9   | 1.8 | (0.9 to 2.7)  | 13.6 | (6.2 to 26.5)  | 0.2 | (0.1 to 0.3) |
| Barbados            | Male   | 10 to 14 | 3.9 | (2.4 to 5.5)  | 19.2 | (9.1 to 35.3)  | 0.3 | (0.1 to 0.5) |
| Barbados            | Male   | 15 to 19 | 6.8 | (4.0 to 10.0) | 37.2 | (20.4 to 61.3) | 0.5 | (0.3 to 0.9) |
| Barbados            | Female | 1 to 4   | 0.2 | (0.1 to 0.4)  | 9.3  | (3.4 to 20.9)  | 0.1 | (0.0 to 0.2) |
| Barbados            | Female | 5 to 9   | 0.9 | (0.4 to 1.6)  | 14.4 | (7.2 to 28.6)  | 0.2 | (0.1 to 0.4) |
| Barbados            | Female | 10 to 14 | 2.3 | (1.1 to 3.6)  | 17.1 | (9.1 to 32.4)  | 0.2 | (0.1 to 0.4) |
| Barbados            | Female | 15 to 19 | 4.2 | (2.0 to 6.5)  | 22.5 | (12.4 to 37.8) | 0.3 | (0.2 to 0.5) |
| Barbados            | Both   | 1 to 4   | 0.4 | (0.2 to 0.6)  | 11.4 | (4.7 to 24.9)  | 0.1 | (0.1 to 0.3) |
| Barbados            | Both   | 5 to 9   | 1.4 | (0.8 to 2.0)  | 14   | (7.4 to 25.0)  | 0.2 | (0.1 to 0.3) |



|          |        |          |     |               |      |                |     |              |
|----------|--------|----------|-----|---------------|------|----------------|-----|--------------|
| Barbados | Both   | 10 to 14 | 3.1 | (2.1 to 4.3)  | 18.2 | (10.0 to 31.2) | 0.2 | (0.1 to 0.4) |
| Barbados | Both   | 15 to 19 | 5.6 | (3.7 to 7.7)  | 30.2 | (19.9 to 44.7) | 0.4 | (0.3 to 0.6) |
| Belize   | Male   | 1 to 4   | 0.5 | (0.1 to 0.8)  | 25.8 | (9.8 to 55.9)  | 0.3 | (0.1 to 0.7) |
| Belize   | Male   | 5 to 9   | 1.5 | (0.2 to 2.6)  | 17.6 | (9.0 to 30.7)  | 0.2 | (0.1 to 0.4) |
| Belize   | Male   | 10 to 14 | 3.5 | (2.0 to 5.5)  | 22.4 | (11.8 to 39.3) | 0.3 | (0.2 to 0.5) |
| Belize   | Male   | 15 to 19 | 6.4 | (3.6 to 9.6)  | 49.2 | (27.4 to 80.7) | 0.7 | (0.4 to 1.1) |
| Belize   | Female | 1 to 4   | 0.3 | (0.1 to 0.5)  | 17.7 | (7.0 to 38.5)  | 0.2 | (0.1 to 0.5) |
| Belize   | Female | 5 to 9   | 1   | (0.2 to 1.8)  | 18.8 | (9.6 to 35.1)  | 0.2 | (0.1 to 0.4) |
| Belize   | Female | 10 to 14 | 2.3 | (1.1 to 3.6)  | 22.5 | (12.3 to 39.6) | 0.3 | (0.2 to 0.5) |
| Belize   | Female | 15 to 19 | 4.3 | (2.3 to 6.7)  | 31.2 | (16.9 to 54.2) | 0.4 | (0.2 to 0.8) |
| Belize   | Both   | 1 to 4   | 0.4 | (0.1 to 0.6)  | 21.8 | (9.2 to 46.7)  | 0.3 | (0.1 to 0.6) |
| Belize   | Both   | 5 to 9   | 1.2 | (0.3 to 1.9)  | 18.2 | (10.1 to 30.7) | 0.2 | (0.1 to 0.4) |
| Belize   | Both   | 10 to 14 | 2.9 | (1.8 to 4.1)  | 22.4 | (13.7 to 36.9) | 0.3 | (0.2 to 0.5) |
| Belize   | Both   | 15 to 19 | 5.3 | (3.7 to 7.3)  | 40.3 | (26.6 to 62.0) | 0.6 | (0.4 to 0.9) |
| Cuba     | Male   | 1 to 4   | 0.5 | (0.2 to 0.8)  | 1.4  | (0.4 to 2.8)   | 0   | (0.0 to 0.0) |
| Cuba     | Male   | 5 to 9   | 1.7 | (0.6 to 2.7)  | 2.9  | (1.3 to 4.7)   | 0   | (0.0 to 0.1) |
| Cuba     | Male   | 10 to 14 | 3.7 | (2.0 to 5.5)  | 5.3  | (2.6 to 9.1)   | 0.1 | (0.0 to 0.1) |
| Cuba     | Male   | 15 to 19 | 6.4 | (3.4 to 9.8)  | 10.3 | (4.9 to 17.3)  | 0.1 | (0.1 to 0.2) |
| Cuba     | Female | 1 to 4   | 0.3 | (0.1 to 0.5)  | 0.9  | (0.3 to 1.6)   | 0   | (0.0 to 0.0) |
| Cuba     | Female | 5 to 9   | 1   | (0.4 to 1.8)  | 1.7  | (0.7 to 2.9)   | 0   | (0.0 to 0.0) |
| Cuba     | Female | 10 to 14 | 2.4 | (1.4 to 3.9)  | 3.2  | (1.3 to 5.3)   | 0   | (0.0 to 0.1) |
| Cuba     | Female | 15 to 19 | 4.6 | (2.6 to 6.9)  | 6    | (2.2 to 9.8)   | 0.1 | (0.0 to 0.1) |
| Cuba     | Both   | 1 to 4   | 0.4 | (0.2 to 0.6)  | 1.2  | (0.5 to 2.0)   | 0   | (0.0 to 0.0) |
| Cuba     | Both   | 5 to 9   | 1.3 | (0.7 to 2.0)  | 2.3  | (1.2 to 3.4)   | 0   | (0.0 to 0.0) |
| Cuba     | Both   | 10 to 14 | 3.1 | (2.1 to 4.2)  | 4.3  | (2.2 to 6.4)   | 0.1 | (0.0 to 0.1) |
| Cuba     | Both   | 15 to 19 | 5.5 | (3.8 to 7.7)  | 8.2  | (4.2 to 12.3)  | 0.1 | (0.0 to 0.2) |
| Dominica | Male   | 1 to 4   | 0.5 | (0.1 to 0.8)  | 31.4 | (12.4 to 73.4) | 0.4 | (0.1 to 0.9) |
| Dominica | Male   | 5 to 9   | 1.6 | (0.3 to 2.6)  | 18.2 | (8.9 to 34.0)  | 0.2 | (0.1 to 0.4) |
| Dominica | Male   | 10 to 14 | 3.7 | (2.0 to 5.8)  | 24.8 | (13.1 to 42.2) | 0.3 | (0.2 to 0.6) |
| Dominica | Male   | 15 to 19 | 6.7 | (3.5 to 10.7) | 48.1 | (25.7 to 79.5) | 0.7 | (0.4 to 1.1) |
| Dominica | Female | 1 to 4   | 0.3 | (0.1 to 0.5)  | 21.4 | (8.1 to 52.1)  | 0.3 | (0.1 to 0.6) |
| Dominica | Female | 5 to 9   | 1   | (0.5 to 1.6)  | 18.2 | (8.6 to 37.9)  | 0.2 | (0.1 to 0.5) |
| Dominica | Female | 10 to 14 | 2.4 | (1.3 to 3.5)  | 19.6 | (10.2 to 34.4) | 0.3 | (0.1 to 0.5) |

|                    |        |          |     |               |      |                 |     |              |
|--------------------|--------|----------|-----|---------------|------|-----------------|-----|--------------|
| Dominica           | Female | 15 to 19 | 4.5 | (2.3 to 6.8)  | 22.4 | (12.1 to 37.0)  | 0.3 | (0.2 to 0.5) |
| Dominica           | Both   | 1 to 4   | 0.4 | (0.2 to 0.6)  | 26.5 | (11.4 to 59.1)  | 0.3 | (0.1 to 0.7) |
| Dominica           | Both   | 5 to 9   | 1.3 | (0.7 to 1.9)  | 18.2 | (9.8 to 33.7)   | 0.2 | (0.1 to 0.4) |
| Dominica           | Both   | 10 to 14 | 3.1 | (2.0 to 4.3)  | 22.3 | (12.8 to 34.7)  | 0.3 | (0.2 to 0.5) |
| Dominica           | Both   | 15 to 19 | 5.6 | (3.7 to 7.9)  | 35.4 | (22.6 to 53.5)  | 0.5 | (0.3 to 0.8) |
| Dominican Republic | Male   | 1 to 4   | 0.5 | (0.3 to 0.9)  | 20.6 | (8.9 to 41.3)   | 0.2 | (0.1 to 0.5) |
| Dominican Republic | Male   | 5 to 9   | 1.8 | (0.9 to 2.8)  | 16.6 | (9.3 to 27.2)   | 0.2 | (0.1 to 0.3) |
| Dominican Republic | Male   | 10 to 14 | 3.9 | (2.4 to 5.6)  | 22.7 | (13.1 to 37.5)  | 0.3 | (0.2 to 0.5) |
| Dominican Republic | Male   | 15 to 19 | 6.7 | (3.9 to 9.8)  | 23.7 | (13.1 to 41.2)  | 0.3 | (0.2 to 0.6) |
| Dominican Republic | Female | 1 to 4   | 0.2 | (0.0 to 0.5)  | 12.9 | (5.3 to 25.5)   | 0.2 | (0.1 to 0.3) |
| Dominican Republic | Female | 5 to 9   | 0.8 | (0.1 to 1.6)  | 11.3 | (5.5 to 19.6)   | 0.1 | (0.1 to 0.2) |
| Dominican Republic | Female | 10 to 14 | 2.2 | (1.1 to 3.4)  | 17.7 | (10.4 to 29.2)  | 0.2 | (0.1 to 0.4) |
| Dominican Republic | Female | 15 to 19 | 4.4 | (2.3 to 6.8)  | 25.6 | (14.7 to 45.1)  | 0.4 | (0.2 to 0.6) |
| Dominican Republic | Both   | 1 to 4   | 0.4 | (0.2 to 0.6)  | 16.8 | (8.5 to 30.0)   | 0.2 | (0.1 to 0.4) |
| Dominican Republic | Both   | 5 to 9   | 1.3 | (0.8 to 1.9)  | 14   | (9.2 to 21.3)   | 0.2 | (0.1 to 0.3) |
| Dominican Republic | Both   | 10 to 14 | 3.1 | (2.3 to 4.0)  | 20.2 | (13.8 to 30.1)  | 0.3 | (0.2 to 0.4) |
| Dominican Republic | Both   | 15 to 19 | 5.6 | (3.8 to 7.5)  | 24.6 | (16.0 to 38.1)  | 0.3 | (0.2 to 0.5) |
| Grenada            | Male   | 1 to 4   | 0.5 | (0.2 to 0.8)  | 18   | (6.1 to 42.5)   | 0.2 | (0.1 to 0.5) |
| Grenada            | Male   | 5 to 9   | 1.6 | (0.6 to 2.6)  | 13.7 | (6.8 to 25.3)   | 0.2 | (0.1 to 0.3) |
| Grenada            | Male   | 10 to 14 | 3.7 | (2.0 to 5.6)  | 19   | (10.6 to 32.3)  | 0.2 | (0.1 to 0.4) |
| Grenada            | Male   | 15 to 19 | 6.5 | (3.4 to 10.0) | 54.9 | (31.5 to 90.0)  | 0.8 | (0.4 to 1.3) |
| Grenada            | Female | 1 to 4   | 0.3 | (0.1 to 0.5)  | 11.5 | (4.2 to 25.7)   | 0.1 | (0.0 to 0.3) |
| Grenada            | Female | 5 to 9   | 0.9 | (0.3 to 1.6)  | 14.5 | (7.0 to 26.2)   | 0.2 | (0.1 to 0.3) |
| Grenada            | Female | 10 to 14 | 2.3 | (1.2 to 3.4)  | 18.8 | (10.4 to 32.0)  | 0.2 | (0.1 to 0.4) |
| Grenada            | Female | 15 to 19 | 4.3 | (2.3 to 6.8)  | 29.4 | (16.6 to 47.0)  | 0.4 | (0.2 to 0.7) |
| Grenada            | Both   | 1 to 4   | 0.4 | (0.2 to 0.6)  | 14.9 | (5.5 to 33.3)   | 0.2 | (0.1 to 0.4) |
| Grenada            | Both   | 5 to 9   | 1.3 | (0.7 to 1.9)  | 14   | (7.8 to 23.9)   | 0.2 | (0.1 to 0.3) |
| Grenada            | Both   | 10 to 14 | 3   | (2.0 to 4.2)  | 18.9 | (11.8 to 29.7)  | 0.2 | (0.2 to 0.4) |
| Grenada            | Both   | 15 to 19 | 5.4 | (3.6 to 7.5)  | 42.3 | (27.9 to 62.7)  | 0.6 | (0.4 to 0.9) |
| Guyana             | Male   | 1 to 4   | 0.5 | (0.2 to 0.9)  | 67.1 | (23.1 to 155.4) | 0.8 | (0.3 to 1.8) |
| Guyana             | Male   | 5 to 9   | 1.7 | (0.9 to 2.7)  | 34.7 | (17.8 to 63.1)  | 0.4 | (0.2 to 0.8) |
| Guyana             | Male   | 10 to 14 | 3.7 | (2.2 to 5.4)  | 36.2 | (19.2 to 64.5)  | 0.5 | (0.3 to 0.9) |
| Guyana             | Male   | 15 to 19 | 6.4 | (3.4 to 9.6)  | 62.1 | (34.2 to 113.8) | 0.9 | (0.5 to 1.6) |

|             |        |          |     |               |       |                 |     |              |
|-------------|--------|----------|-----|---------------|-------|-----------------|-----|--------------|
| Guyana      | Female | 1 to 4   | 0.2 | (0.0 to 0.4)  | 45.3  | (14.2 to 115.9) | 0.5 | (0.2 to 1.4) |
| Guyana      | Female | 5 to 9   | 0.9 | (0.1 to 1.5)  | 33.2  | (14.3 to 74.3)  | 0.4 | (0.2 to 0.9) |
| Guyana      | Female | 10 to 14 | 2.2 | (0.9 to 3.5)  | 37.3  | (18.9 to 70.9)  | 0.5 | (0.3 to 1.0) |
| Guyana      | Female | 15 to 19 | 4   | (2.0 to 6.3)  | 45.6  | (23.5 to 84.7)  | 0.6 | (0.3 to 1.2) |
| Guyana      | Both   | 1 to 4   | 0.4 | (0.2 to 0.6)  | 56.4  | (21.2 to 137.9) | 0.7 | (0.3 to 1.6) |
| Guyana      | Both   | 5 to 9   | 1.3 | (0.8 to 2.0)  | 34    | (18.5 to 61.4)  | 0.4 | (0.2 to 0.8) |
| Guyana      | Both   | 10 to 14 | 3   | (2.1 to 4.2)  | 36.7  | (22.0 to 60.1)  | 0.5 | (0.3 to 0.8) |
| Guyana      | Both   | 15 to 19 | 5.3 | (3.6 to 7.4)  | 54.4  | (34.9 to 88.0)  | 0.8 | (0.5 to 1.3) |
| Haiti       | Male   | 1 to 4   | 0.5 | (0.2 to 0.9)  | 100.4 | (32.0 to 220.7) | 1.2 | (0.4 to 2.6) |
| Haiti       | Male   | 5 to 9   | 1.7 | (0.6 to 2.8)  | 34.2  | (12.0 to 70.8)  | 0.4 | (0.1 to 0.9) |
| Haiti       | Male   | 10 to 14 | 3.8 | (1.9 to 5.8)  | 35.4  | (15.7 to 65.6)  | 0.5 | (0.2 to 0.9) |
| Haiti       | Male   | 15 to 19 | 6.6 | (3.6 to 10.0) | 59.6  | (26.3 to 110.3) | 0.8 | (0.4 to 1.6) |
| Haiti       | Female | 1 to 4   | 0.3 | (0.1 to 0.5)  | 105.7 | (38.9 to 217.9) | 1.3 | (0.5 to 2.6) |
| Haiti       | Female | 5 to 9   | 1   | (0.5 to 1.7)  | 33.6  | (12.5 to 69.2)  | 0.4 | (0.2 to 0.9) |
| Haiti       | Female | 10 to 14 | 2.4 | (1.4 to 3.6)  | 31.2  | (11.8 to 68.0)  | 0.4 | (0.2 to 0.9) |
| Haiti       | Female | 15 to 19 | 4.4 | (2.5 to 6.8)  | 51.8  | (22.3 to 106.6) | 0.7 | (0.3 to 1.5) |
| Haiti       | Both   | 1 to 4   | 0.4 | (0.2 to 0.6)  | 103   | (47.7 to 190.5) | 1.2 | (0.6 to 2.3) |
| Haiti       | Both   | 5 to 9   | 1.4 | (0.7 to 2.0)  | 33.9  | (16.5 to 61.6)  | 0.4 | (0.2 to 0.8) |
| Haiti       | Both   | 10 to 14 | 3.1 | (1.9 to 4.2)  | 33.4  | (17.5 to 63.9)  | 0.4 | (0.2 to 0.9) |
| Haiti       | Both   | 15 to 19 | 5.5 | (3.6 to 7.5)  | 55.8  | (31.1 to 95.1)  | 0.8 | (0.4 to 1.4) |
| Jamaica     | Male   | 1 to 4   | 0.6 | (0.2 to 0.9)  | 42.8  | (15.2 to 103.6) | 0.5 | (0.2 to 1.2) |
| Jamaica     | Male   | 5 to 9   | 1.8 | (0.9 to 2.8)  | 14.6  | (6.8 to 29.0)   | 0.2 | (0.1 to 0.4) |
| Jamaica     | Male   | 10 to 14 | 3.8 | (1.9 to 5.4)  | 18.9  | (9.0 to 33.7)   | 0.2 | (0.1 to 0.4) |
| Jamaica     | Male   | 15 to 19 | 6.5 | (3.1 to 9.6)  | 33.9  | (17.6 to 59.6)  | 0.5 | (0.2 to 0.8) |
| Jamaica     | Female | 1 to 4   | 0.3 | (0.1 to 0.5)  | 29.4  | (10.3 to 71.0)  | 0.3 | (0.1 to 0.8) |
| Jamaica     | Female | 5 to 9   | 1   | (0.4 to 1.7)  | 15.5  | (7.2 to 31.7)   | 0.2 | (0.1 to 0.4) |
| Jamaica     | Female | 10 to 14 | 2.3 | (1.1 to 3.7)  | 17.2  | (8.6 to 34.7)   | 0.2 | (0.1 to 0.5) |
| Jamaica     | Female | 15 to 19 | 4.4 | (2.2 to 6.7)  | 24.2  | (12.9 to 48.8)  | 0.3 | (0.2 to 0.7) |
| Jamaica     | Both   | 1 to 4   | 0.4 | (0.2 to 0.6)  | 36.2  | (13.9 to 81.4)  | 0.4 | (0.2 to 1.0) |
| Jamaica     | Both   | 5 to 9   | 1.4 | (0.9 to 2.0)  | 15.1  | (7.7 to 28.9)   | 0.2 | (0.1 to 0.4) |
| Jamaica     | Both   | 10 to 14 | 3.1 | (2.1 to 4.2)  | 18    | (9.8 to 32.1)   | 0.2 | (0.1 to 0.4) |
| Jamaica     | Both   | 15 to 19 | 5.4 | (3.6 to 7.3)  | 29.1  | (18.2 to 47.7)  | 0.4 | (0.2 to 0.7) |
| Saint Lucia | Male   | 1 to 4   | 0.5 | (0.3 to 0.8)  | 24.6  | (8.8 to 58.7)   | 0.3 | (0.1 to 0.7) |

|                                  |        |          |     |               |      |                 |     |              |
|----------------------------------|--------|----------|-----|---------------|------|-----------------|-----|--------------|
| Saint Lucia                      | Male   | 5 to 9   | 1.7 | (0.9 to 2.7)  | 14.4 | (6.6 to 28.1)   | 0.2 | (0.1 to 0.4) |
| Saint Lucia                      | Male   | 10 to 14 | 3.7 | (2.3 to 5.5)  | 20.1 | (9.7 to 36.7)   | 0.3 | (0.1 to 0.5) |
| Saint Lucia                      | Male   | 15 to 19 | 6.4 | (3.9 to 9.6)  | 38.2 | (20.5 to 67.3)  | 0.5 | (0.3 to 1.0) |
| Saint Lucia                      | Female | 1 to 4   | 0.3 | (0.1 to 0.5)  | 16.3 | (5.8 to 37.5)   | 0.2 | (0.1 to 0.4) |
| Saint Lucia                      | Female | 5 to 9   | 0.9 | (0.4 to 1.6)  | 14.7 | (6.8 to 27.8)   | 0.2 | (0.1 to 0.3) |
| Saint Lucia                      | Female | 10 to 14 | 2.2 | (1.2 to 3.5)  | 17   | (8.3 to 30.6)   | 0.2 | (0.1 to 0.4) |
| Saint Lucia                      | Female | 15 to 19 | 4.2 | (2.1 to 6.5)  | 22.7 | (11.8 to 37.8)  | 0.3 | (0.2 to 0.5) |
| Saint Lucia                      | Both   | 1 to 4   | 0.4 | (0.2 to 0.6)  | 20.5 | (7.7 to 46.2)   | 0.2 | (0.1 to 0.5) |
| Saint Lucia                      | Both   | 5 to 9   | 1.3 | (0.8 to 1.9)  | 14.5 | (7.5 to 26.1)   | 0.2 | (0.1 to 0.3) |
| Saint Lucia                      | Both   | 10 to 14 | 3   | (2.0 to 4.0)  | 18.5 | (9.9 to 31.9)   | 0.2 | (0.1 to 0.4) |
| Saint Lucia                      | Both   | 15 to 19 | 5.3 | (3.6 to 7.1)  | 30.4 | (18.6 to 46.2)  | 0.4 | (0.3 to 0.7) |
| Saint Vincent and the Grenadines | Male   | 1 to 4   | 0.5 | (0.3 to 0.9)  | 32.5 | (11.8 to 75.5)  | 0.4 | (0.1 to 0.9) |
| Saint Vincent and the Grenadines | Male   | 5 to 9   | 1.7 | (0.9 to 2.8)  | 18.3 | (9.0 to 36.0)   | 0.2 | (0.1 to 0.5) |
| Saint Vincent and the Grenadines | Male   | 10 to 14 | 3.8 | (2.2 to 5.9)  | 25   | (13.6 to 43.3)  | 0.3 | (0.2 to 0.6) |
| Saint Vincent and the Grenadines | Male   | 15 to 19 | 6.6 | (3.4 to 10.4) | 46.4 | (26.6 to 77.3)  | 0.7 | (0.4 to 1.1) |
| Saint Vincent and the Grenadines | Female | 1 to 4   | 0.3 | (0.1 to 0.4)  | 21.6 | (7.8 to 51.8)   | 0.3 | (0.1 to 0.6) |
| Saint Vincent and the Grenadines | Female | 5 to 9   | 0.9 | (0.4 to 1.6)  | 18.6 | (9.8 to 34.0)   | 0.2 | (0.1 to 0.4) |
| Saint Vincent and the Grenadines | Female | 10 to 14 | 2.2 | (1.1 to 3.6)  | 20.3 | (10.8 to 35.0)  | 0.3 | (0.1 to 0.5) |
| Saint Vincent and the Grenadines | Female | 15 to 19 | 4.1 | (2.0 to 6.6)  | 26.5 | (13.6 to 42.4)  | 0.4 | (0.2 to 0.6) |
| Saint Vincent and the Grenadines | Both   | 1 to 4   | 0.4 | (0.2 to 0.6)  | 27.2 | (10.7 to 61.9)  | 0.3 | (0.1 to 0.7) |
| Saint Vincent and the Grenadines | Both   | 5 to 9   | 1.3 | (0.9 to 1.9)  | 18.5 | (10.2 to 32.5)  | 0.2 | (0.1 to 0.4) |
| Saint Vincent and the Grenadines | Both   | 10 to 14 | 3   | (2.0 to 4.2)  | 22.7 | (13.9 to 35.5)  | 0.3 | (0.2 to 0.5) |
| Saint Vincent and the Grenadines | Both   | 15 to 19 | 5.4 | (3.2 to 7.8)  | 36.6 | (23.5 to 53.5)  | 0.5 | (0.3 to 0.8) |
| Suriname                         | Male   | 1 to 4   | 0.5 | (0.2 to 0.8)  | 62.5 | (32.5 to 113.7) | 0.7 | (0.4 to 1.3) |
| Suriname                         | Male   | 5 to 9   | 1.7 | (0.7 to 2.6)  | 30.8 | (18.9 to 50.4)  | 0.4 | (0.2 to 0.6) |
| Suriname                         | Male   | 10 to 14 | 3.7 | (2.2 to 5.3)  | 36.2 | (21.1 to 57.7)  | 0.5 | (0.3 to 0.8) |
| Suriname                         | Male   | 15 to 19 | 6.4 | (3.8 to 9.9)  | 59   | (31.6 to 99.9)  | 0.8 | (0.4 to 1.4) |
| Suriname                         | Female | 1 to 4   | 0.3 | (0.2 to 0.5)  | 40.3 | (21.8 to 73.9)  | 0.5 | (0.3 to 0.9) |
| Suriname                         | Female | 5 to 9   | 1   | (0.6 to 1.7)  | 28.3 | (16.5 to 51.6)  | 0.4 | (0.2 to 0.6) |
| Suriname                         | Female | 10 to 14 | 2.4 | (1.4 to 3.6)  | 27.3 | (16.1 to 46.2)  | 0.4 | (0.2 to 0.6) |
| Suriname                         | Female | 15 to 19 | 4.4 | (2.4 to 6.8)  | 30.8 | (17.1 to 51.7)  | 0.4 | (0.2 to 0.7) |
| Suriname                         | Both   | 1 to 4   | 0.4 | (0.2 to 0.6)  | 51.8 | (30.3 to 88.2)  | 0.6 | (0.4 to 1.0) |
| Suriname                         | Both   | 5 to 9   | 1.4 | (0.8 to 1.9)  | 29.6 | (20.2 to 46.8)  | 0.4 | (0.3 to 0.6) |

|                     |        |          |     |               |      |                |     |              |
|---------------------|--------|----------|-----|---------------|------|----------------|-----|--------------|
| Suriname            | Both   | 10 to 14 | 3   | (2.1 to 4.0)  | 31.8 | (21.9 to 48.4) | 0.4 | (0.3 to 0.6) |
| Suriname            | Both   | 15 to 19 | 5.4 | (3.6 to 7.3)  | 45.1 | (29.1 to 69.3) | 0.6 | (0.4 to 1.0) |
| Trinidad and Tobago | Male   | 1 to 4   | 0.5 | (0.2 to 0.8)  | 30.6 | (11.3 to 70.0) | 0.4 | (0.1 to 0.8) |
| Trinidad and Tobago | Male   | 5 to 9   | 1.6 | (0.8 to 2.7)  | 16   | (7.1 to 32.2)  | 0.2 | (0.1 to 0.4) |
| Trinidad and Tobago | Male   | 10 to 14 | 3.8 | (2.0 to 5.6)  | 22.6 | (11.6 to 41.3) | 0.3 | (0.1 to 0.6) |
| Trinidad and Tobago | Male   | 15 to 19 | 6.6 | (3.5 to 10.0) | 44.8 | (24.6 to 77.5) | 0.6 | (0.3 to 1.1) |
| Trinidad and Tobago | Female | 1 to 4   | 0.3 | (0.1 to 0.5)  | 20.1 | (6.9 to 48.8)  | 0.2 | (0.1 to 0.6) |
| Trinidad and Tobago | Female | 5 to 9   | 1   | (0.4 to 1.6)  | 14.9 | (6.4 to 30.9)  | 0.2 | (0.1 to 0.4) |
| Trinidad and Tobago | Female | 10 to 14 | 2.3 | (1.1 to 3.7)  | 19.8 | (10.3 to 36.1) | 0.3 | (0.1 to 0.5) |
| Trinidad and Tobago | Female | 15 to 19 | 4.3 | (2.1 to 6.8)  | 22.8 | (13.2 to 38.9) | 0.3 | (0.2 to 0.5) |
| Trinidad and Tobago | Both   | 1 to 4   | 0.4 | (0.2 to 0.6)  | 25.4 | (10.0 to 58.0) | 0.3 | (0.1 to 0.7) |
| Trinidad and Tobago | Both   | 5 to 9   | 1.3 | (0.7 to 1.9)  | 15.5 | (6.9 to 29.9)  | 0.2 | (0.1 to 0.4) |
| Trinidad and Tobago | Both   | 10 to 14 | 3   | (1.9 to 4.1)  | 21.2 | (12.5 to 36.0) | 0.3 | (0.2 to 0.5) |
| Trinidad and Tobago | Both   | 15 to 19 | 5.5 | (3.5 to 7.4)  | 33.9 | (21.5 to 53.2) | 0.5 | (0.3 to 0.8) |
| Bolivia             | Male   | 1 to 4   | 0.5 | (0.2 to 0.8)  | 17.3 | (4.9 to 45.1)  | 0.2 | (0.1 to 0.5) |
| Bolivia             | Male   | 5 to 9   | 1.4 | (0.8 to 2.2)  | 12.7 | (4.8 to 27.0)  | 0.2 | (0.1 to 0.3) |
| Bolivia             | Male   | 10 to 14 | 2.9 | (1.6 to 4.3)  | 15.7 | (7.3 to 28.4)  | 0.2 | (0.1 to 0.4) |
| Bolivia             | Male   | 15 to 19 | 4.6 | (2.5 to 7.1)  | 28.8 | (11.9 to 54.5) | 0.4 | (0.2 to 0.8) |
| Bolivia             | Female | 1 to 4   | 0.2 | (0.1 to 0.4)  | 17.5 | (5.9 to 46.3)  | 0.2 | (0.1 to 0.5) |
| Bolivia             | Female | 5 to 9   | 0.7 | (0.3 to 1.3)  | 14.8 | (5.2 to 36.0)  | 0.2 | (0.1 to 0.5) |
| Bolivia             | Female | 10 to 14 | 1.5 | (0.8 to 2.5)  | 13.6 | (4.8 to 31.6)  | 0.2 | (0.1 to 0.4) |
| Bolivia             | Female | 15 to 19 | 2.6 | (1.2 to 4.1)  | 26.7 | (10.8 to 54.5) | 0.4 | (0.2 to 0.8) |
| Bolivia             | Both   | 1 to 4   | 0.3 | (0.2 to 0.5)  | 17.4 | (7.4 to 41.1)  | 0.2 | (0.1 to 0.5) |
| Bolivia             | Both   | 5 to 9   | 1.1 | (0.6 to 1.5)  | 13.7 | (6.5 to 27.1)  | 0.2 | (0.1 to 0.3) |
| Bolivia             | Both   | 10 to 14 | 2.2 | (1.5 to 3.1)  | 14.7 | (8.0 to 25.5)  | 0.2 | (0.1 to 0.3) |
| Bolivia             | Both   | 15 to 19 | 3.6 | (2.4 to 5.0)  | 27.8 | (15.2 to 47.5) | 0.4 | (0.2 to 0.7) |
| Ecuador             | Male   | 1 to 4   | 0.5 | (0.2 to 0.8)  | 13   | (5.8 to 25.9)  | 0.2 | (0.1 to 0.3) |
| Ecuador             | Male   | 5 to 9   | 1.5 | (0.7 to 2.3)  | 9.5  | (5.5 to 16.2)  | 0.1 | (0.1 to 0.2) |
| Ecuador             | Male   | 10 to 14 | 2.9 | (1.8 to 4.3)  | 17.4 | (9.6 to 29.6)  | 0.2 | (0.1 to 0.4) |
| Ecuador             | Male   | 15 to 19 | 4.6 | (2.6 to 7.1)  | 50   | (27.2 to 90.6) | 0.7 | (0.4 to 1.3) |
| Ecuador             | Female | 1 to 4   | 0.2 | (0.1 to 0.4)  | 7.3  | (3.8 to 14.9)  | 0.1 | (0.0 to 0.2) |
| Ecuador             | Female | 5 to 9   | 0.8 | (0.3 to 1.3)  | 7.9  | (4.6 to 13.9)  | 0.1 | (0.1 to 0.2) |
| Ecuador             | Female | 10 to 14 | 1.6 | (0.8 to 2.5)  | 16.4 | (9.4 to 31.8)  | 0.2 | (0.1 to 0.4) |

|            |        |          |     |              |      |                |     |              |
|------------|--------|----------|-----|--------------|------|----------------|-----|--------------|
| Ecuador    | Female | 15 to 19 | 2.7 | (1.5 to 4.1) | 33.6 | (18.1 to 66.1) | 0.5 | (0.3 to 1.0) |
| Ecuador    | Both   | 1 to 4   | 0.4 | (0.2 to 0.6) | 10.2 | (5.7 to 19.3)  | 0.1 | (0.1 to 0.2) |
| Ecuador    | Both   | 5 to 9   | 1.1 | (0.7 to 1.6) | 8.7  | (5.9 to 13.7)  | 0.1 | (0.1 to 0.2) |
| Ecuador    | Both   | 10 to 14 | 2.3 | (1.6 to 3.2) | 16.9 | (10.8 to 28.6) | 0.2 | (0.1 to 0.4) |
| Ecuador    | Both   | 15 to 19 | 3.7 | (2.5 to 5.3) | 41.9 | (26.4 to 70.5) | 0.6 | (0.4 to 1.0) |
| Peru       | Male   | 1 to 4   | 0.4 | (0.1 to 0.8) | 10.5 | (4.2 to 22.6)  | 0.1 | (0.0 to 0.3) |
| Peru       | Male   | 5 to 9   | 1.4 | (0.5 to 2.2) | 15.4 | (8.1 to 29.6)  | 0.2 | (0.1 to 0.4) |
| Peru       | Male   | 10 to 14 | 2.8 | (1.6 to 4.3) | 19   | (9.5 to 35.6)  | 0.3 | (0.1 to 0.5) |
| Peru       | Male   | 15 to 19 | 4.5 | (2.6 to 6.9) | 43.2 | (20.2 to 88.3) | 0.6 | (0.3 to 1.3) |
| Peru       | Female | 1 to 4   | 0.3 | (0.1 to 0.5) | 6    | (2.4 to 14.9)  | 0.1 | (0.0 to 0.2) |
| Peru       | Female | 5 to 9   | 0.8 | (0.4 to 1.4) | 10.2 | (5.8 to 19.1)  | 0.1 | (0.1 to 0.2) |
| Peru       | Female | 10 to 14 | 1.7 | (1.0 to 2.5) | 18.1 | (10.5 to 32.7) | 0.2 | (0.1 to 0.4) |
| Peru       | Female | 15 to 19 | 2.7 | (1.6 to 4.1) | 29.3 | (16.2 to 53.2) | 0.4 | (0.2 to 0.8) |
| Peru       | Both   | 1 to 4   | 0.3 | (0.1 to 0.5) | 8.3  | (4.2 to 17.1)  | 0.1 | (0.0 to 0.2) |
| Peru       | Both   | 5 to 9   | 1.1 | (0.6 to 1.6) | 12.9 | (8.1 to 22.3)  | 0.2 | (0.1 to 0.3) |
| Peru       | Both   | 10 to 14 | 2.3 | (1.6 to 3.1) | 18.6 | (11.6 to 31.0) | 0.2 | (0.2 to 0.4) |
| Peru       | Both   | 15 to 19 | 3.6 | (2.5 to 5.0) | 36.4 | (22.2 to 64.5) | 0.5 | (0.3 to 0.9) |
| Colombia   | Male   | 1 to 4   | 0.1 | (0.0 to 0.1) | 10.1 | (4.9 to 18.6)  | 0.1 | (0.1 to 0.2) |
| Colombia   | Male   | 5 to 9   | 0.2 | (0.0 to 0.4) | 5    | (2.8 to 8.7)   | 0.1 | (0.0 to 0.1) |
| Colombia   | Male   | 10 to 14 | 0.5 | (0.2 to 0.8) | 6.7  | (3.5 to 11.3)  | 0.1 | (0.0 to 0.2) |
| Colombia   | Male   | 15 to 19 | 1   | (0.5 to 1.7) | 15.5 | (8.4 to 28.1)  | 0.2 | (0.1 to 0.4) |
| Colombia   | Female | 1 to 4   | 0.1 | (0.0 to 0.1) | 9.1  | (3.9 to 18.5)  | 0.1 | (0.0 to 0.2) |
| Colombia   | Female | 5 to 9   | 0.2 | (0.1 to 0.3) | 4.8  | (2.8 to 8.3)   | 0.1 | (0.0 to 0.1) |
| Colombia   | Female | 10 to 14 | 0.4 | (0.2 to 0.7) | 5.9  | (3.2 to 11.0)  | 0.1 | (0.0 to 0.1) |
| Colombia   | Female | 15 to 19 | 0.8 | (0.4 to 1.3) | 10   | (5.5 to 17.3)  | 0.1 | (0.1 to 0.2) |
| Colombia   | Both   | 1 to 4   | 0.1 | (0.0 to 0.1) | 9.6  | (5.6 to 16.2)  | 0.1 | (0.1 to 0.2) |
| Colombia   | Both   | 5 to 9   | 0.2 | (0.1 to 0.3) | 4.9  | (3.2 to 7.8)   | 0.1 | (0.0 to 0.1) |
| Colombia   | Both   | 10 to 14 | 0.4 | (0.3 to 0.7) | 6.3  | (4.2 to 9.9)   | 0.1 | (0.1 to 0.1) |
| Colombia   | Both   | 15 to 19 | 0.9 | (0.6 to 1.3) | 12.8 | (8.2 to 20.4)  | 0.2 | (0.1 to 0.3) |
| Costa Rica | Male   | 1 to 4   | 0.1 | (0.0 to 0.1) | 2    | (0.9 to 4.4)   | 0   | (0.0 to 0.1) |
| Costa Rica | Male   | 5 to 9   | 0.2 | (0.1 to 0.5) | 1.4  | (0.7 to 3.0)   | 0   | (0.0 to 0.0) |
| Costa Rica | Male   | 10 to 14 | 0.5 | (0.3 to 1.0) | 3.1  | (1.5 to 6.8)   | 0   | (0.0 to 0.1) |
| Costa Rica | Male   | 15 to 19 | 1   | (0.5 to 1.7) | 7.8  | (3.8 to 16.6)  | 0.1 | (0.1 to 0.2) |

|             |        |          |     |              |      |                 |     |              |
|-------------|--------|----------|-----|--------------|------|-----------------|-----|--------------|
| Costa Rica  | Female | 1 to 4   | 0.1 | (0.0 to 0.1) | 2.2  | (1.0 to 4.4)    | 0   | (0.0 to 0.1) |
| Costa Rica  | Female | 5 to 9   | 0.2 | (0.1 to 0.3) | 1.9  | (1.1 to 3.9)    | 0   | (0.0 to 0.0) |
| Costa Rica  | Female | 10 to 14 | 0.4 | (0.2 to 0.7) | 3.8  | (1.8 to 9.8)    | 0.1 | (0.0 to 0.1) |
| Costa Rica  | Female | 15 to 19 | 0.8 | (0.4 to 1.3) | 5.8  | (3.2 to 12.2)   | 0.1 | (0.0 to 0.2) |
| Costa Rica  | Both   | 1 to 4   | 0.1 | (0.0 to 0.1) | 2.1  | (1.1 to 3.9)    | 0   | (0.0 to 0.0) |
| Costa Rica  | Both   | 5 to 9   | 0.2 | (0.1 to 0.3) | 1.7  | (1.0 to 3.1)    | 0   | (0.0 to 0.0) |
| Costa Rica  | Both   | 10 to 14 | 0.5 | (0.3 to 0.7) | 3.4  | (1.9 to 7.5)    | 0   | (0.0 to 0.1) |
| Costa Rica  | Both   | 15 to 19 | 0.9 | (0.6 to 1.4) | 6.8  | (4.0 to 13.6)   | 0.1 | (0.1 to 0.2) |
| El Salvador | Male   | 1 to 4   | 0.1 | (0.0 to 0.1) | 12   | (4.8 to 23.6)   | 0.1 | (0.1 to 0.3) |
| El Salvador | Male   | 5 to 9   | 0.2 | (0.1 to 0.4) | 7    | (3.6 to 12.6)   | 0.1 | (0.0 to 0.2) |
| El Salvador | Male   | 10 to 14 | 0.6 | (0.3 to 0.9) | 14.3 | (7.3 to 26.6)   | 0.2 | (0.1 to 0.4) |
| El Salvador | Male   | 15 to 19 | 1   | (0.5 to 1.7) | 32.7 | (17.3 to 60.1)  | 0.5 | (0.2 to 0.9) |
| El Salvador | Female | 1 to 4   | 0.1 | (0.0 to 0.1) | 9.2  | (3.6 to 21.2)   | 0.1 | (0.0 to 0.3) |
| El Salvador | Female | 5 to 9   | 0.2 | (0.1 to 0.4) | 6.8  | (3.7 to 13.1)   | 0.1 | (0.0 to 0.2) |
| El Salvador | Female | 10 to 14 | 0.4 | (0.2 to 0.7) | 17.1 | (9.1 to 38.1)   | 0.2 | (0.1 to 0.5) |
| El Salvador | Female | 15 to 19 | 0.8 | (0.4 to 1.3) | 25.2 | (13.7 to 45.0)  | 0.4 | (0.2 to 0.6) |
| El Salvador | Both   | 1 to 4   | 0.1 | (0.0 to 0.1) | 10.7 | (5.3 to 20.7)   | 0.1 | (0.1 to 0.2) |
| El Salvador | Both   | 5 to 9   | 0.2 | (0.1 to 0.4) | 6.9  | (4.4 to 11.4)   | 0.1 | (0.1 to 0.1) |
| El Salvador | Both   | 10 to 14 | 0.5 | (0.3 to 0.7) | 15.7 | (9.7 to 29.4)   | 0.2 | (0.1 to 0.4) |
| El Salvador | Both   | 15 to 19 | 0.9 | (0.6 to 1.3) | 29   | (18.9 to 46.8)  | 0.4 | (0.3 to 0.7) |
| Guatemala   | Male   | 1 to 4   | 0.1 | (0.0 to 0.1) | 15.3 | (6.3 to 30.4)   | 0.2 | (0.1 to 0.4) |
| Guatemala   | Male   | 5 to 9   | 0.2 | (0.1 to 0.5) | 7.5  | (3.6 to 13.6)   | 0.1 | (0.0 to 0.2) |
| Guatemala   | Male   | 10 to 14 | 0.5 | (0.3 to 0.9) | 13   | (6.4 to 24.1)   | 0.2 | (0.1 to 0.3) |
| Guatemala   | Male   | 15 to 19 | 1   | (0.5 to 1.7) | 27.9 | (14.6 to 52.2)  | 0.4 | (0.2 to 0.8) |
| Guatemala   | Female | 1 to 4   | 0   | (0.0 to 0.1) | 15.9 | (4.1 to 41.1)   | 0.2 | (0.0 to 0.5) |
| Guatemala   | Female | 5 to 9   | 0.2 | (0.1 to 0.3) | 8    | (3.0 to 17.6)   | 0.1 | (0.0 to 0.2) |
| Guatemala   | Female | 10 to 14 | 0.4 | (0.2 to 0.7) | 12.2 | (5.5 to 23.1)   | 0.2 | (0.1 to 0.3) |
| Guatemala   | Female | 15 to 19 | 0.8 | (0.4 to 1.3) | 33.6 | (18.9 to 58.3)  | 0.5 | (0.3 to 0.8) |
| Guatemala   | Both   | 1 to 4   | 0.1 | (0.0 to 0.1) | 15.6 | (7.2 to 32.4)   | 0.2 | (0.1 to 0.4) |
| Guatemala   | Both   | 5 to 9   | 0.2 | (0.1 to 0.3) | 7.7  | (4.2 to 14.0)   | 0.1 | (0.1 to 0.2) |
| Guatemala   | Both   | 10 to 14 | 0.5 | (0.3 to 0.7) | 12.6 | (8.0 to 21.0)   | 0.2 | (0.1 to 0.3) |
| Guatemala   | Both   | 15 to 19 | 0.9 | (0.6 to 1.3) | 30.7 | (20.1 to 49.1)  | 0.4 | (0.3 to 0.7) |
| Honduras    | Male   | 1 to 4   | 0.1 | (0.0 to 0.2) | 74.7 | (20.5 to 182.3) | 0.9 | (0.2 to 2.2) |

|           |        |          |     |              |      |                 |     |              |
|-----------|--------|----------|-----|--------------|------|-----------------|-----|--------------|
| Honduras  | Male   | 5 to 9   | 0.3 | (0.1 to 0.5) | 41.5 | (15.4 to 85.8)  | 0.5 | (0.2 to 1.1) |
| Honduras  | Male   | 10 to 14 | 0.6 | (0.3 to 1.0) | 42.6 | (16.0 to 92.0)  | 0.6 | (0.2 to 1.2) |
| Honduras  | Male   | 15 to 19 | 1.2 | (0.6 to 1.9) | 62.9 | (21.8 to 146.6) | 0.9 | (0.3 to 2.1) |
| Honduras  | Female | 1 to 4   | 0.1 | (0.0 to 0.1) | 47.5 | (11.1 to 128.7) | 0.6 | (0.1 to 1.5) |
| Honduras  | Female | 5 to 9   | 0.2 | (0.1 to 0.4) | 27.9 | (7.6 to 70.1)   | 0.4 | (0.1 to 0.9) |
| Honduras  | Female | 10 to 14 | 0.5 | (0.2 to 0.9) | 36.7 | (12.7 to 87.2)  | 0.5 | (0.2 to 1.2) |
| Honduras  | Female | 15 to 19 | 0.9 | (0.5 to 1.6) | 62.5 | (20.0 to 125.3) | 0.9 | (0.3 to 1.8) |
| Honduras  | Both   | 1 to 4   | 0.1 | (0.0 to 0.1) | 61.4 | (23.0 to 143.6) | 0.7 | (0.3 to 1.7) |
| Honduras  | Both   | 5 to 9   | 0.2 | (0.1 to 0.4) | 34.8 | (15.2 to 68.0)  | 0.4 | (0.2 to 0.9) |
| Honduras  | Both   | 10 to 14 | 0.5 | (0.3 to 0.8) | 39.7 | (17.8 to 79.2)  | 0.5 | (0.2 to 1.1) |
| Honduras  | Both   | 15 to 19 | 1.1 | (0.6 to 1.5) | 62.7 | (28.0 to 116.7) | 0.9 | (0.4 to 1.7) |
| Mexico    | Male   | 1 to 4   | 0.1 | (0.1 to 0.1) | 4.3  | (2.4 to 7.1)    | 0.1 | (0.0 to 0.1) |
| Mexico    | Male   | 5 to 9   | 0.2 | (0.2 to 0.3) | 3.1  | (2.0 to 4.7)    | 0   | (0.0 to 0.1) |
| Mexico    | Male   | 10 to 14 | 0.5 | (0.5 to 0.6) | 5.1  | (3.6 to 7.4)    | 0.1 | (0.0 to 0.1) |
| Mexico    | Male   | 15 to 19 | 1   | (0.9 to 1.1) | 12.6 | (8.8 to 18.6)   | 0.2 | (0.1 to 0.3) |
| Mexico    | Female | 1 to 4   | 0.1 | (0.0 to 0.1) | 3.5  | (1.9 to 5.5)    | 0   | (0.0 to 0.1) |
| Mexico    | Female | 5 to 9   | 0.2 | (0.2 to 0.2) | 2.6  | (1.7 to 3.9)    | 0   | (0.0 to 0.0) |
| Mexico    | Female | 10 to 14 | 0.4 | (0.4 to 0.5) | 4.2  | (2.6 to 6.3)    | 0.1 | (0.0 to 0.1) |
| Mexico    | Female | 15 to 19 | 0.8 | (0.7 to 0.9) | 9.7  | (6.2 to 14.8)   | 0.1 | (0.1 to 0.2) |
| Mexico    | Both   | 1 to 4   | 0.1 | (0.1 to 0.1) | 3.9  | (2.4 to 5.7)    | 0   | (0.0 to 0.1) |
| Mexico    | Both   | 5 to 9   | 0.2 | (0.2 to 0.2) | 2.8  | (2.1 to 4.0)    | 0   | (0.0 to 0.0) |
| Mexico    | Both   | 10 to 14 | 0.5 | (0.4 to 0.5) | 4.7  | (3.6 to 6.3)    | 0.1 | (0.0 to 0.1) |
| Mexico    | Both   | 15 to 19 | 0.9 | (0.8 to 1.0) | 11.2 | (8.7 to 15.2)   | 0.2 | (0.1 to 0.2) |
| Nicaragua | Male   | 1 to 4   | 0.1 | (0.0 to 0.1) | 5.8  | (2.4 to 11.7)   | 0.1 | (0.0 to 0.1) |
| Nicaragua | Male   | 5 to 9   | 0.2 | (0.1 to 0.4) | 4.5  | (2.1 to 8.2)    | 0.1 | (0.0 to 0.1) |
| Nicaragua | Male   | 10 to 14 | 0.5 | (0.2 to 0.9) | 5.2  | (2.8 to 9.9)    | 0.1 | (0.0 to 0.1) |
| Nicaragua | Male   | 15 to 19 | 0.9 | (0.5 to 1.6) | 6.1  | (3.0 to 11.0)   | 0.1 | (0.0 to 0.2) |
| Nicaragua | Female | 1 to 4   | 0.1 | (0.0 to 0.1) | 4.3  | (1.8 to 9.9)    | 0.1 | (0.0 to 0.1) |
| Nicaragua | Female | 5 to 9   | 0.2 | (0.1 to 0.4) | 2.3  | (1.0 to 3.9)    | 0   | (0.0 to 0.0) |
| Nicaragua | Female | 10 to 14 | 0.5 | (0.2 to 0.8) | 3.2  | (1.6 to 6.3)    | 0   | (0.0 to 0.1) |
| Nicaragua | Female | 15 to 19 | 0.8 | (0.4 to 1.3) | 5.7  | (3.0 to 10.7)   | 0.1 | (0.0 to 0.2) |
| Nicaragua | Both   | 1 to 4   | 0.1 | (0.0 to 0.1) | 5.1  | (2.6 to 9.5)    | 0.1 | (0.0 to 0.1) |
| Nicaragua | Both   | 5 to 9   | 0.2 | (0.1 to 0.4) | 3.5  | (1.9 to 5.6)    | 0   | (0.0 to 0.1) |



|           |        |          |     |               |      |                |     |              |
|-----------|--------|----------|-----|---------------|------|----------------|-----|--------------|
| Nicaragua | Both   | 10 to 14 | 0.5 | (0.3 to 0.7)  | 4.2  | (2.6 to 7.5)   | 0.1 | (0.0 to 0.1) |
| Nicaragua | Both   | 15 to 19 | 0.9 | (0.5 to 1.3)  | 5.9  | (3.6 to 9.9)   | 0.1 | (0.0 to 0.1) |
| Panama    | Male   | 1 to 4   | 0.1 | (0.0 to 0.1)  | 12.9 | (5.6 to 27.7)  | 0.2 | (0.1 to 0.3) |
| Panama    | Male   | 5 to 9   | 0.2 | (0.1 to 0.5)  | 6.1  | (2.8 to 13.0)  | 0.1 | (0.0 to 0.2) |
| Panama    | Male   | 10 to 14 | 0.6 | (0.3 to 1.0)  | 4.8  | (2.4 to 9.9)   | 0.1 | (0.0 to 0.1) |
| Panama    | Male   | 15 to 19 | 1.1 | (0.4 to 1.9)  | 17.4 | (7.0 to 42.7)  | 0.2 | (0.1 to 0.6) |
| Panama    | Female | 1 to 4   | 0.1 | (0.0 to 0.1)  | 5.4  | (2.4 to 12.2)  | 0.1 | (0.0 to 0.1) |
| Panama    | Female | 5 to 9   | 0.2 | (0.1 to 0.4)  | 2.3  | (1.2 to 5.5)   | 0   | (0.0 to 0.1) |
| Panama    | Female | 10 to 14 | 0.4 | (0.2 to 0.7)  | 2.5  | (1.4 to 5.3)   | 0   | (0.0 to 0.1) |
| Panama    | Female | 15 to 19 | 0.8 | (0.5 to 1.4)  | 8.8  | (3.9 to 23.4)  | 0.1 | (0.1 to 0.3) |
| Panama    | Both   | 1 to 4   | 0.1 | (0.0 to 0.1)  | 9.2  | (4.6 to 18.5)  | 0.1 | (0.1 to 0.2) |
| Panama    | Both   | 5 to 9   | 0.2 | (0.1 to 0.3)  | 4.2  | (2.3 to 8.5)   | 0.1 | (0.0 to 0.1) |
| Panama    | Both   | 10 to 14 | 0.5 | (0.3 to 0.7)  | 3.7  | (2.2 to 7.2)   | 0   | (0.0 to 0.1) |
| Panama    | Both   | 15 to 19 | 1   | (0.6 to 1.4)  | 13.2 | (6.3 to 29.0)  | 0.2 | (0.1 to 0.4) |
| Venezuela | Male   | 1 to 4   | 0.1 | (0.0 to 0.1)  | 4.2  | (2.0 to 7.8)   | 0.1 | (0.0 to 0.1) |
| Venezuela | Male   | 5 to 9   | 0.2 | (0.1 to 0.5)  | 2.9  | (1.5 to 5.2)   | 0   | (0.0 to 0.1) |
| Venezuela | Male   | 10 to 14 | 0.5 | (0.2 to 0.9)  | 4.1  | (2.3 to 7.2)   | 0.1 | (0.0 to 0.1) |
| Venezuela | Male   | 15 to 19 | 1   | (0.5 to 1.7)  | 19.4 | (10.0 to 39.7) | 0.3 | (0.1 to 0.6) |
| Venezuela | Female | 1 to 4   | 0.1 | (0.0 to 0.1)  | 3.7  | (1.7 to 7.2)   | 0   | (0.0 to 0.1) |
| Venezuela | Female | 5 to 9   | 0.2 | (0.1 to 0.4)  | 2.8  | (1.5 to 5.6)   | 0   | (0.0 to 0.1) |
| Venezuela | Female | 10 to 14 | 0.4 | (0.2 to 0.8)  | 5    | (2.6 to 12.0)  | 0.1 | (0.0 to 0.2) |
| Venezuela | Female | 15 to 19 | 0.8 | (0.4 to 1.4)  | 10.2 | (5.5 to 22.5)  | 0.1 | (0.1 to 0.3) |
| Venezuela | Both   | 1 to 4   | 0.1 | (0.0 to 0.1)  | 4    | (2.2 to 6.6)   | 0   | (0.0 to 0.1) |
| Venezuela | Both   | 5 to 9   | 0.2 | (0.1 to 0.3)  | 2.9  | (1.8 to 5.0)   | 0   | (0.0 to 0.1) |
| Venezuela | Both   | 10 to 14 | 0.5 | (0.3 to 0.8)  | 4.5  | (2.7 to 8.8)   | 0.1 | (0.0 to 0.1) |
| Venezuela | Both   | 15 to 19 | 0.9 | (0.6 to 1.4)  | 14.9 | (8.5 to 29.0)  | 0.2 | (0.1 to 0.4) |
| Brazil    | Male   | 1 to 4   | 0.8 | (0.4 to 1.2)  | 4.4  | (1.4 to 9.3)   | 0.1 | (0.0 to 0.1) |
| Brazil    | Male   | 5 to 9   | 2.5 | (1.4 to 3.8)  | 3.4  | (1.9 to 5.1)   | 0   | (0.0 to 0.1) |
| Brazil    | Male   | 10 to 14 | 5.3 | (3.4 to 7.4)  | 4.2  | (2.7 to 6.4)   | 0   | (0.0 to 0.1) |
| Brazil    | Male   | 15 to 19 | 8.8 | (5.4 to 12.4) | 14   | (8.0 to 22.0)  | 0.2 | (0.1 to 0.3) |
| Brazil    | Female | 1 to 4   | 0.5 | (0.3 to 0.8)  | 2.6  | (1.1 to 5.1)   | 0   | (0.0 to 0.1) |
| Brazil    | Female | 5 to 9   | 1.6 | (0.8 to 2.4)  | 2.6  | (1.5 to 3.9)   | 0   | (0.0 to 0.0) |
| Brazil    | Female | 10 to 14 | 3.6 | (2.3 to 5.2)  | 4.1  | (2.5 to 6.0)   | 0   | (0.0 to 0.1) |

|          |        |          |     |               |      |               |     |              |
|----------|--------|----------|-----|---------------|------|---------------|-----|--------------|
| Brazil   | Female | 15 to 19 | 6.2 | (3.8 to 9.0)  | 9.8  | (5.9 to 15.7) | 0.1 | (0.1 to 0.2) |
| Brazil   | Both   | 1 to 4   | 0.6 | (0.4 to 0.9)  | 3.5  | (1.5 to 6.9)  | 0   | (0.0 to 0.1) |
| Brazil   | Both   | 5 to 9   | 2.1 | (1.4 to 2.7)  | 3    | (2.0 to 4.1)  | 0   | (0.0 to 0.0) |
| Brazil   | Both   | 10 to 14 | 4.5 | (3.3 to 5.6)  | 4.1  | (3.0 to 5.6)  | 0   | (0.0 to 0.1) |
| Brazil   | Both   | 15 to 19 | 7.5 | (5.4 to 10.0) | 12   | (8.2 to 16.6) | 0.2 | (0.1 to 0.2) |
| Paraguay | Male   | 1 to 4   | 0.8 | (0.4 to 1.2)  | 2.1  | (0.7 to 5.0)  | 0   | (0.0 to 0.1) |
| Paraguay | Male   | 5 to 9   | 2.5 | (1.3 to 3.7)  | 2.3  | (1.1 to 4.9)  | 0   | (0.0 to 0.1) |
| Paraguay | Male   | 10 to 14 | 5.3 | (3.2 to 7.7)  | 4.1  | (2.3 to 8.0)  | 0   | (0.0 to 0.1) |
| Paraguay | Male   | 15 to 19 | 9   | (5.2 to 13.1) | 18.4 | (8.1 to 38.2) | 0.2 | (0.1 to 0.5) |
| Paraguay | Female | 1 to 4   | 0.4 | (0.2 to 0.7)  | 2.5  | (1.0 to 5.4)  | 0   | (0.0 to 0.1) |
| Paraguay | Female | 5 to 9   | 1.5 | (0.8 to 2.2)  | 2.8  | (1.2 to 6.0)  | 0   | (0.0 to 0.1) |
| Paraguay | Female | 10 to 14 | 3.4 | (2.1 to 4.8)  | 5.8  | (2.6 to 12.6) | 0.1 | (0.0 to 0.2) |
| Paraguay | Female | 15 to 19 | 6   | (3.6 to 8.5)  | 11.7 | (5.4 to 24.0) | 0.2 | (0.1 to 0.3) |
| Paraguay | Both   | 1 to 4   | 0.6 | (0.4 to 0.8)  | 2.3  | (1.1 to 4.5)  | 0   | (0.0 to 0.1) |
| Paraguay | Both   | 5 to 9   | 2   | (1.3 to 2.7)  | 2.6  | (1.4 to 4.7)  | 0   | (0.0 to 0.1) |
| Paraguay | Both   | 10 to 14 | 4.4 | (3.0 to 5.7)  | 5    | (2.8 to 9.4)  | 0.1 | (0.0 to 0.1) |
| Paraguay | Both   | 15 to 19 | 7.5 | (5.1 to 9.9)  | 15.1 | (8.7 to 28.2) | 0.2 | (0.1 to 0.4) |
| Algeria  | Male   | 1 to 4   | 0.5 | (0.3 to 0.7)  | 2.3  | (0.8 to 5.3)  | 0   | (0.0 to 0.1) |
| Algeria  | Male   | 5 to 9   | 1.6 | (1.1 to 2.1)  | 1.6  | (0.8 to 2.9)  | 0   | (0.0 to 0.0) |
| Algeria  | Male   | 10 to 14 | 3   | (2.1 to 4.0)  | 3.2  | (1.5 to 5.7)  | 0   | (0.0 to 0.1) |
| Algeria  | Male   | 15 to 19 | 4.6 | (2.9 to 6.3)  | 18.8 | (7.1 to 43.0) | 0.3 | (0.1 to 0.6) |
| Algeria  | Female | 1 to 4   | 0.3 | (0.2 to 0.4)  | 3.9  | (1.4 to 8.9)  | 0   | (0.0 to 0.1) |
| Algeria  | Female | 5 to 9   | 1   | (0.6 to 1.4)  | 1.6  | (0.7 to 3.1)  | 0   | (0.0 to 0.0) |
| Algeria  | Female | 10 to 14 | 1.9 | (1.2 to 2.9)  | 2.9  | (1.2 to 5.8)  | 0   | (0.0 to 0.1) |
| Algeria  | Female | 15 to 19 | 3   | (1.8 to 4.6)  | 9.3  | (4.6 to 16.7) | 0.1 | (0.1 to 0.2) |
| Algeria  | Both   | 1 to 4   | 0.4 | (0.3 to 0.5)  | 3.1  | (1.4 to 5.7)  | 0   | (0.0 to 0.1) |
| Algeria  | Both   | 5 to 9   | 1.3 | (0.9 to 1.7)  | 1.6  | (0.9 to 2.6)  | 0   | (0.0 to 0.0) |
| Algeria  | Both   | 10 to 14 | 2.5 | (1.8 to 3.2)  | 3.1  | (1.5 to 4.9)  | 0   | (0.0 to 0.1) |
| Algeria  | Both   | 15 to 19 | 3.8 | (2.8 to 5.1)  | 14.2 | (7.1 to 28.0) | 0.2 | (0.1 to 0.4) |
| Bahrain  | Male   | 1 to 4   | 0.5 | (0.3 to 0.7)  | 2.9  | (1.0 to 6.2)  | 0   | (0.0 to 0.1) |
| Bahrain  | Male   | 5 to 9   | 1.6 | (1.1 to 2.2)  | 1.6  | (0.8 to 2.8)  | 0   | (0.0 to 0.0) |
| Bahrain  | Male   | 10 to 14 | 3.1 | (2.0 to 4.4)  | 2.9  | (1.4 to 5.2)  | 0   | (0.0 to 0.1) |
| Bahrain  | Male   | 15 to 19 | 4.7 | (3.1 to 6.7)  | 9.3  | (4.6 to 15.2) | 0.1 | (0.1 to 0.2) |

|         |        |          |     |              |      |                 |     |              |
|---------|--------|----------|-----|--------------|------|-----------------|-----|--------------|
| Bahrain | Female | 1 to 4   | 0.3 | (0.2 to 0.4) | 8.8  | (3.3 to 18.8)   | 0.1 | (0.0 to 0.2) |
| Bahrain | Female | 5 to 9   | 0.9 | (0.6 to 1.3) | 2.6  | (1.1 to 4.6)    | 0   | (0.0 to 0.1) |
| Bahrain | Female | 10 to 14 | 1.9 | (1.2 to 2.6) | 4.1  | (2.1 to 6.7)    | 0.1 | (0.0 to 0.1) |
| Bahrain | Female | 15 to 19 | 3   | (1.8 to 4.2) | 5.7  | (2.8 to 8.7)    | 0.1 | (0.0 to 0.1) |
| Bahrain | Both   | 1 to 4   | 0.4 | (0.3 to 0.5) | 5.8  | (2.5 to 11.2)   | 0.1 | (0.0 to 0.1) |
| Bahrain | Both   | 5 to 9   | 1.3 | (0.9 to 1.7) | 2.1  | (1.1 to 3.4)    | 0   | (0.0 to 0.0) |
| Bahrain | Both   | 10 to 14 | 2.5 | (1.8 to 3.3) | 3.5  | (2.0 to 5.2)    | 0   | (0.0 to 0.1) |
| Bahrain | Both   | 15 to 19 | 3.9 | (2.8 to 5.1) | 7.6  | (4.2 to 11.1)   | 0.1 | (0.1 to 0.2) |
| Egypt   | Male   | 1 to 4   | 0.5 | (0.3 to 0.7) | 57.2 | (27.4 to 106.7) | 0.7 | (0.3 to 1.3) |
| Egypt   | Male   | 5 to 9   | 1.6 | (1.0 to 2.1) | 28.5 | (18.2 to 46.3)  | 0.4 | (0.2 to 0.6) |
| Egypt   | Male   | 10 to 14 | 3.1 | (2.1 to 4.4) | 33.2 | (21.2 to 50.1)  | 0.4 | (0.3 to 0.7) |
| Egypt   | Male   | 15 to 19 | 4.7 | (3.1 to 7.0) | 70.6 | (44.6 to 120.9) | 1   | (0.6 to 1.7) |
| Egypt   | Female | 1 to 4   | 0.3 | (0.2 to 0.5) | 52.8 | (22.9 to 93.2)  | 0.6 | (0.3 to 1.1) |
| Egypt   | Female | 5 to 9   | 1   | (0.6 to 1.5) | 24.3 | (14.6 to 37.6)  | 0.3 | (0.2 to 0.5) |
| Egypt   | Female | 10 to 14 | 2   | (1.2 to 2.9) | 27.7 | (16.5 to 41.9)  | 0.4 | (0.2 to 0.6) |
| Egypt   | Female | 15 to 19 | 3.3 | (1.7 to 4.6) | 36.2 | (22.3 to 57.5)  | 0.5 | (0.3 to 0.8) |
| Egypt   | Both   | 1 to 4   | 0.4 | (0.3 to 0.6) | 55.1 | (32.6 to 89.4)  | 0.7 | (0.4 to 1.1) |
| Egypt   | Both   | 5 to 9   | 1.3 | (0.9 to 1.6) | 26.5 | (19.1 to 38.0)  | 0.3 | (0.2 to 0.5) |
| Egypt   | Both   | 10 to 14 | 2.6 | (2.0 to 3.3) | 30.5 | (21.6 to 42.1)  | 0.4 | (0.3 to 0.6) |
| Egypt   | Both   | 15 to 19 | 4   | (3.0 to 5.2) | 53.7 | (38.5 to 82.0)  | 0.8 | (0.5 to 1.2) |
| Iran    | Male   | 1 to 4   | 0.8 | (0.5 to 1.0) | 4.6  | (1.3 to 9.8)    | 0.1 | (0.0 to 0.1) |
| Iran    | Male   | 5 to 9   | 2.2 | (1.5 to 2.9) | 3.8  | (1.2 to 7.5)    | 0   | (0.0 to 0.1) |
| Iran    | Male   | 10 to 14 | 4   | (2.8 to 5.3) | 7.2  | (2.0 to 12.9)   | 0.1 | (0.0 to 0.2) |
| Iran    | Male   | 15 to 19 | 5.9 | (3.9 to 8.0) | 12.5 | (4.1 to 25.6)   | 0.2 | (0.0 to 0.4) |
| Iran    | Female | 1 to 4   | 0.5 | (0.3 to 0.7) | 5.7  | (2.3 to 13.8)   | 0.1 | (0.0 to 0.2) |
| Iran    | Female | 5 to 9   | 1.4 | (0.8 to 2.0) | 3.6  | (1.7 to 7.7)    | 0   | (0.0 to 0.1) |
| Iran    | Female | 10 to 14 | 2.6 | (1.6 to 3.6) | 5.4  | (2.6 to 10.4)   | 0.1 | (0.0 to 0.1) |
| Iran    | Female | 15 to 19 | 4   | (2.4 to 5.7) | 6.9  | (3.1 to 12.3)   | 0.1 | (0.0 to 0.2) |
| Iran    | Both   | 1 to 4   | 0.6 | (0.4 to 0.8) | 5.1  | (2.3 to 9.7)    | 0.1 | (0.0 to 0.1) |
| Iran    | Both   | 5 to 9   | 1.8 | (1.4 to 2.3) | 3.7  | (1.9 to 6.3)    | 0   | (0.0 to 0.1) |
| Iran    | Both   | 10 to 14 | 3.3 | (2.6 to 4.2) | 6.3  | (3.0 to 9.9)    | 0.1 | (0.0 to 0.1) |
| Iran    | Both   | 15 to 19 | 4.9 | (3.7 to 6.3) | 9.7  | (4.4 to 16.7)   | 0.1 | (0.1 to 0.2) |
| Iraq    | Male   | 1 to 4   | 0.5 | (0.3 to 0.7) | 6.8  | (2.2 to 16.7)   | 0.1 | (0.0 to 0.2) |

|        |        |          |     |              |      |                |     |              |
|--------|--------|----------|-----|--------------|------|----------------|-----|--------------|
| Iraq   | Male   | 5 to 9   | 1.5 | (1.0 to 2.1) | 9.9  | (3.8 to 21.4)  | 0.1 | (0.0 to 0.3) |
| Iraq   | Male   | 10 to 14 | 3   | (1.9 to 4.1) | 16.8 | (8.1 to 29.6)  | 0.2 | (0.1 to 0.4) |
| Iraq   | Male   | 15 to 19 | 4.6 | (2.8 to 6.7) | 34   | (15.5 to 68.7) | 0.5 | (0.2 to 1.0) |
| Iraq   | Female | 1 to 4   | 0.3 | (0.2 to 0.5) | 20.9 | (6.2 to 51.0)  | 0.2 | (0.1 to 0.6) |
| Iraq   | Female | 5 to 9   | 1   | (0.6 to 1.4) | 12.2 | (5.0 to 23.1)  | 0.2 | (0.1 to 0.3) |
| Iraq   | Female | 10 to 14 | 2   | (1.2 to 2.8) | 20   | (9.3 to 36.8)  | 0.3 | (0.1 to 0.5) |
| Iraq   | Female | 15 to 19 | 3.2 | (1.9 to 4.6) | 25.1 | (11.4 to 46.9) | 0.4 | (0.2 to 0.7) |
| Iraq   | Both   | 1 to 4   | 0.4 | (0.3 to 0.5) | 13.7 | (5.3 to 30.6)  | 0.2 | (0.1 to 0.4) |
| Iraq   | Both   | 5 to 9   | 1.2 | (0.9 to 1.6) | 11   | (6.0 to 19.1)  | 0.1 | (0.1 to 0.2) |
| Iraq   | Both   | 10 to 14 | 2.5 | (1.8 to 3.2) | 18.3 | (10.9 to 29.0) | 0.2 | (0.1 to 0.4) |
| Iraq   | Both   | 15 to 19 | 3.9 | (2.8 to 5.2) | 29.6 | (16.3 to 49.8) | 0.4 | (0.2 to 0.7) |
| Jordan | Male   | 1 to 4   | 0.5 | (0.3 to 0.8) | 17.7 | (6.2 to 40.9)  | 0.2 | (0.1 to 0.5) |
| Jordan | Male   | 5 to 9   | 1.7 | (1.1 to 2.4) | 1.5  | (0.7 to 2.8)   | 0   | (0.0 to 0.0) |
| Jordan | Male   | 10 to 14 | 3.1 | (2.1 to 4.6) | 2.1  | (1.1 to 3.5)   | 0   | (0.0 to 0.0) |
| Jordan | Male   | 15 to 19 | 4.6 | (3.0 to 7.0) | 2.8  | (1.5 to 5.0)   | 0   | (0.0 to 0.1) |
| Jordan | Female | 1 to 4   | 0.3 | (0.2 to 0.5) | 3.7  | (0.9 to 8.6)   | 0   | (0.0 to 0.1) |
| Jordan | Female | 5 to 9   | 1   | (0.6 to 1.6) | 1.8  | (0.8 to 3.5)   | 0   | (0.0 to 0.0) |
| Jordan | Female | 10 to 14 | 2.1 | (1.3 to 3.1) | 2.6  | (1.1 to 5.3)   | 0   | (0.0 to 0.1) |
| Jordan | Female | 15 to 19 | 3.3 | (2.1 to 4.9) | 6.3  | (3.2 to 11.8)  | 0.1 | (0.0 to 0.2) |
| Jordan | Both   | 1 to 4   | 0.4 | (0.3 to 0.6) | 10.9 | (4.9 to 22.7)  | 0.1 | (0.1 to 0.3) |
| Jordan | Both   | 5 to 9   | 1.4 | (1.0 to 1.7) | 1.6  | (1.0 to 2.7)   | 0   | (0.0 to 0.0) |
| Jordan | Both   | 10 to 14 | 2.6 | (2.0 to 3.4) | 2.4  | (1.3 to 3.9)   | 0   | (0.0 to 0.0) |
| Jordan | Both   | 15 to 19 | 4   | (2.9 to 5.2) | 4.5  | (2.8 to 7.3)   | 0.1 | (0.0 to 0.1) |
| Kuwait | Male   | 1 to 4   | 0.5 | (0.3 to 0.9) | 11.6 | (6.0 to 19.0)  | 0.1 | (0.1 to 0.2) |
| Kuwait | Male   | 5 to 9   | 1.7 | (1.0 to 2.4) | 5.4  | (2.7 to 8.7)   | 0.1 | (0.0 to 0.1) |
| Kuwait | Male   | 10 to 14 | 3.2 | (2.0 to 4.5) | 8    | (4.0 to 13.1)  | 0.1 | (0.0 to 0.2) |
| Kuwait | Male   | 15 to 19 | 4.9 | (2.9 to 7.0) | 19.2 | (10.9 to 29.7) | 0.3 | (0.1 to 0.4) |
| Kuwait | Female | 1 to 4   | 0.3 | (0.2 to 0.5) | 19.9 | (8.6 to 31.4)  | 0.2 | (0.1 to 0.4) |
| Kuwait | Female | 5 to 9   | 1   | (0.6 to 1.5) | 9.6  | (4.8 to 14.6)  | 0.1 | (0.1 to 0.2) |
| Kuwait | Female | 10 to 14 | 2.1 | (1.2 to 3.0) | 11.5 | (4.3 to 18.2)  | 0.1 | (0.1 to 0.2) |
| Kuwait | Female | 15 to 19 | 3.3 | (1.7 to 4.8) | 17.7 | (8.1 to 27.9)  | 0.2 | (0.1 to 0.4) |
| Kuwait | Both   | 1 to 4   | 0.4 | (0.3 to 0.6) | 15.7 | (8.3 to 24.3)  | 0.2 | (0.1 to 0.3) |
| Kuwait | Both   | 5 to 9   | 1.4 | (0.9 to 1.8) | 7.4  | (4.4 to 10.5)  | 0.1 | (0.1 to 0.1) |

|         |        |          |     |              |      |                 |     |              |
|---------|--------|----------|-----|--------------|------|-----------------|-----|--------------|
| Kuwait  | Both   | 10 to 14 | 2.7 | (1.9 to 3.5) | 9.7  | (4.7 to 14.4)   | 0.1 | (0.1 to 0.2) |
| Kuwait  | Both   | 15 to 19 | 4.1 | (2.8 to 5.5) | 18.5 | (11.6 to 25.9)  | 0.3 | (0.2 to 0.4) |
| Lebanon | Male   | 1 to 4   | 0.4 | (0.3 to 0.7) | 3    | (0.3 to 9.1)    | 0   | (0.0 to 0.1) |
| Lebanon | Male   | 5 to 9   | 1.4 | (0.9 to 2.0) | 2    | (0.3 to 5.1)    | 0   | (0.0 to 0.1) |
| Lebanon | Male   | 10 to 14 | 2.8 | (1.8 to 3.9) | 3.5  | (0.6 to 8.1)    | 0   | (0.0 to 0.1) |
| Lebanon | Male   | 15 to 19 | 4.2 | (2.6 to 6.2) | 6    | (1.1 to 15.4)   | 0.1 | (0.0 to 0.2) |
| Lebanon | Female | 1 to 4   | 0.3 | (0.1 to 0.4) | 16.2 | (0.9 to 40.9)   | 0.2 | (0.0 to 0.5) |
| Lebanon | Female | 5 to 9   | 0.9 | (0.6 to 1.3) | 6.5  | (0.7 to 14.6)   | 0.1 | (0.0 to 0.2) |
| Lebanon | Female | 10 to 14 | 1.9 | (1.1 to 2.8) | 11.5 | (1.2 to 26.9)   | 0.2 | (0.0 to 0.4) |
| Lebanon | Female | 15 to 19 | 3   | (1.7 to 4.6) | 15.9 | (1.6 to 34.3)   | 0.2 | (0.0 to 0.5) |
| Lebanon | Both   | 1 to 4   | 0.4 | (0.2 to 0.5) | 9.5  | (0.7 to 22.6)   | 0.1 | (0.0 to 0.3) |
| Lebanon | Both   | 5 to 9   | 1.2 | (0.8 to 1.5) | 4.3  | (0.6 to 8.6)    | 0.1 | (0.0 to 0.1) |
| Lebanon | Both   | 10 to 14 | 2.3 | (1.7 to 3.1) | 7.6  | (1.1 to 15.8)   | 0.1 | (0.0 to 0.2) |
| Lebanon | Both   | 15 to 19 | 3.6 | (2.5 to 4.9) | 11.1 | (1.7 to 21.5)   | 0.2 | (0.0 to 0.3) |
| Libya   | Male   | 1 to 4   | 0.1 | (0.0 to 0.1) | 50.7 | (19.4 to 106.2) | 0.6 | (0.2 to 1.3) |
| Libya   | Male   | 5 to 9   | 0.3 | (0.2 to 0.4) | 13.8 | (6.0 to 27.7)   | 0.2 | (0.1 to 0.3) |
| Libya   | Male   | 10 to 14 | 0.6 | (0.3 to 0.8) | 20.5 | (8.8 to 38.6)   | 0.3 | (0.1 to 0.5) |
| Libya   | Male   | 15 to 19 | 0.8 | (0.4 to 1.4) | 34.9 | (15.1 to 72.2)  | 0.5 | (0.2 to 1.0) |
| Libya   | Female | 1 to 4   | 0.1 | (0.0 to 0.1) | 62.2 | (22.4 to 135.8) | 0.7 | (0.3 to 1.6) |
| Libya   | Female | 5 to 9   | 0.2 | (0.1 to 0.3) | 12.9 | (5.0 to 27.4)   | 0.2 | (0.1 to 0.3) |
| Libya   | Female | 10 to 14 | 0.4 | (0.2 to 0.6) | 19.1 | (7.7 to 35.8)   | 0.3 | (0.1 to 0.5) |
| Libya   | Female | 15 to 19 | 0.6 | (0.3 to 1.1) | 26.2 | (12.1 to 48.8)  | 0.4 | (0.2 to 0.7) |
| Libya   | Both   | 1 to 4   | 0.1 | (0.1 to 0.1) | 56.3 | (26.9 to 102.5) | 0.7 | (0.3 to 1.2) |
| Libya   | Both   | 5 to 9   | 0.2 | (0.2 to 0.3) | 13.3 | (6.9 to 22.9)   | 0.2 | (0.1 to 0.3) |
| Libya   | Both   | 10 to 14 | 0.5 | (0.3 to 0.7) | 19.8 | (10.1 to 31.7)  | 0.3 | (0.1 to 0.4) |
| Libya   | Both   | 15 to 19 | 0.7 | (0.5 to 1.1) | 30.6 | (17.5 to 51.2)  | 0.4 | (0.3 to 0.7) |
| Morocco | Male   | 1 to 4   | 0.5 | (0.3 to 0.7) | 29.5 | (11.0 to 63.8)  | 0.3 | (0.1 to 0.8) |
| Morocco | Male   | 5 to 9   | 1.5 | (1.0 to 2.1) | 5.4  | (2.0 to 10.5)   | 0.1 | (0.0 to 0.1) |
| Morocco | Male   | 10 to 14 | 3   | (1.9 to 4.2) | 14.6 | (7.4 to 24.6)   | 0.2 | (0.1 to 0.3) |
| Morocco | Male   | 15 to 19 | 4.7 | (2.7 to 6.7) | 34   | (16.2 to 63.5)  | 0.5 | (0.2 to 0.9) |
| Morocco | Female | 1 to 4   | 0.3 | (0.2 to 0.5) | 28.1 | (11.5 to 55.5)  | 0.3 | (0.1 to 0.7) |
| Morocco | Female | 5 to 9   | 1   | (0.6 to 1.4) | 5.1  | (2.3 to 10.4)   | 0.1 | (0.0 to 0.1) |
| Morocco | Female | 10 to 14 | 2   | (1.2 to 2.9) | 8.5  | (3.7 to 16.5)   | 0.1 | (0.0 to 0.2) |

|           |        |          |     |              |      |                |     |              |
|-----------|--------|----------|-----|--------------|------|----------------|-----|--------------|
| Morocco   | Female | 15 to 19 | 3.2 | (1.8 to 4.6) | 13.2 | (6.5 to 24.0)  | 0.2 | (0.1 to 0.3) |
| Morocco   | Both   | 1 to 4   | 0.4 | (0.3 to 0.5) | 28.8 | (14.1 to 51.7) | 0.3 | (0.2 to 0.6) |
| Morocco   | Both   | 5 to 9   | 1.3 | (0.9 to 1.6) | 5.2  | (2.5 to 8.7)   | 0.1 | (0.0 to 0.1) |
| Morocco   | Both   | 10 to 14 | 2.5 | (1.8 to 3.3) | 11.6 | (6.7 to 18.3)  | 0.2 | (0.1 to 0.2) |
| Morocco   | Both   | 15 to 19 | 3.9 | (2.8 to 5.2) | 23.9 | (13.7 to 39.2) | 0.3 | (0.2 to 0.6) |
| Palestine | Male   | 1 to 4   | 0.8 | (0.5 to 1.1) | 1.6  | (0.5 to 3.6)   | 0   | (0.0 to 0.0) |
| Palestine | Male   | 5 to 9   | 2.2 | (1.5 to 3.0) | 1.6  | (0.8 to 3.0)   | 0   | (0.0 to 0.0) |
| Palestine | Male   | 10 to 14 | 4.1 | (2.7 to 5.6) | 12.7 | (5.2 to 30.4)  | 0.2 | (0.1 to 0.4) |
| Palestine | Male   | 15 to 19 | 5.9 | (3.7 to 8.4) | 10.7 | (5.0 to 21.3)  | 0.1 | (0.1 to 0.3) |
| Palestine | Female | 1 to 4   | 0.4 | (0.3 to 0.6) | 18   | (5.9 to 43.8)  | 0.2 | (0.1 to 0.5) |
| Palestine | Female | 5 to 9   | 1.3 | (0.8 to 1.8) | 2.5  | (0.9 to 5.3)   | 0   | (0.0 to 0.1) |
| Palestine | Female | 10 to 14 | 2.5 | (1.6 to 3.4) | 8.2  | (3.8 to 16.6)  | 0.1 | (0.0 to 0.2) |
| Palestine | Female | 15 to 19 | 3.9 | (2.4 to 5.4) | 6.7  | (2.7 to 12.8)  | 0.1 | (0.0 to 0.2) |
| Palestine | Both   | 1 to 4   | 0.6 | (0.4 to 0.8) | 9.6  | (3.6 to 22.0)  | 0.1 | (0.0 to 0.3) |
| Palestine | Both   | 5 to 9   | 1.7 | (1.3 to 2.2) | 2    | (1.0 to 3.5)   | 0   | (0.0 to 0.0) |
| Palestine | Both   | 10 to 14 | 3.3 | (2.5 to 4.1) | 10.5 | (5.4 to 21.3)  | 0.1 | (0.1 to 0.3) |
| Palestine | Both   | 15 to 19 | 4.9 | (3.5 to 6.4) | 8.7  | (4.6 to 15.1)  | 0.1 | (0.1 to 0.2) |
| Oman      | Male   | 1 to 4   | 0.5 | (0.3 to 0.7) | 4    | (1.4 to 8.8)   | 0   | (0.0 to 0.1) |
| Oman      | Male   | 5 to 9   | 1.5 | (1.0 to 2.0) | 1.1  | (0.5 to 2.3)   | 0   | (0.0 to 0.0) |
| Oman      | Male   | 10 to 14 | 2.9 | (1.9 to 4.0) | 2    | (0.9 to 3.7)   | 0   | (0.0 to 0.0) |
| Oman      | Male   | 15 to 19 | 4.4 | (2.7 to 6.2) | 8.3  | (3.9 to 15.6)  | 0.1 | (0.0 to 0.2) |
| Oman      | Female | 1 to 4   | 0.3 | (0.2 to 0.4) | 3.6  | (1.0 to 8.5)   | 0   | (0.0 to 0.1) |
| Oman      | Female | 5 to 9   | 1   | (0.6 to 1.4) | 1.9  | (0.8 to 3.7)   | 0   | (0.0 to 0.0) |
| Oman      | Female | 10 to 14 | 1.9 | (1.3 to 2.9) | 6.1  | (2.7 to 11.7)  | 0.1 | (0.0 to 0.2) |
| Oman      | Female | 15 to 19 | 3.1 | (1.9 to 4.6) | 17.2 | (8.0 to 33.2)  | 0.2 | (0.1 to 0.5) |
| Oman      | Both   | 1 to 4   | 0.4 | (0.3 to 0.5) | 3.8  | (1.6 to 7.4)   | 0   | (0.0 to 0.1) |
| Oman      | Both   | 5 to 9   | 1.2 | (0.9 to 1.6) | 1.5  | (0.8 to 2.6)   | 0   | (0.0 to 0.0) |
| Oman      | Both   | 10 to 14 | 2.4 | (1.8 to 3.2) | 4    | (2.0 to 7.0)   | 0   | (0.0 to 0.1) |
| Oman      | Both   | 15 to 19 | 3.8 | (2.7 to 5.1) | 12.3 | (7.1 to 19.7)  | 0.2 | (0.1 to 0.3) |
| Qatar     | Male   | 1 to 4   | 0.5 | (0.3 to 0.7) | 12.1 | (4.6 to 26.0)  | 0.1 | (0.1 to 0.3) |
| Qatar     | Male   | 5 to 9   | 1.4 | (0.9 to 2.1) | 6.9  | (3.4 to 12.6)  | 0.1 | (0.0 to 0.2) |
| Qatar     | Male   | 10 to 14 | 2.8 | (1.8 to 4.0) | 7.4  | (4.4 to 11.4)  | 0.1 | (0.1 to 0.1) |
| Qatar     | Male   | 15 to 19 | 4.3 | (2.7 to 6.3) | 7.7  | (3.7 to 14.4)  | 0.1 | (0.0 to 0.2) |

|              |        |          |     |              |      |                |     |              |
|--------------|--------|----------|-----|--------------|------|----------------|-----|--------------|
| Qatar        | Female | 1 to 4   | 0.3 | (0.2 to 0.4) | 12.2 | (5.7 to 23.0)  | 0.1 | (0.1 to 0.3) |
| Qatar        | Female | 5 to 9   | 0.9 | (0.6 to 1.4) | 4.6  | (2.5 to 7.9)   | 0.1 | (0.0 to 0.1) |
| Qatar        | Female | 10 to 14 | 1.8 | (1.1 to 2.8) | 5.5  | (2.6 to 10.2)  | 0.1 | (0.0 to 0.1) |
| Qatar        | Female | 15 to 19 | 2.9 | (1.7 to 4.4) | 5.3  | (2.7 to 9.9)   | 0.1 | (0.0 to 0.1) |
| Qatar        | Both   | 1 to 4   | 0.4 | (0.3 to 0.5) | 12.2 | (6.2 to 21.0)  | 0.1 | (0.1 to 0.2) |
| Qatar        | Both   | 5 to 9   | 1.2 | (0.8 to 1.5) | 5.8  | (3.5 to 9.0)   | 0.1 | (0.0 to 0.1) |
| Qatar        | Both   | 10 to 14 | 2.4 | (1.7 to 3.1) | 6.5  | (4.1 to 9.8)   | 0.1 | (0.0 to 0.1) |
| Qatar        | Both   | 15 to 19 | 3.8 | (2.7 to 5.2) | 6.9  | (3.9 to 11.4)  | 0.1 | (0.0 to 0.2) |
| Saudi Arabia | Male   | 1 to 4   | 0.2 | (0.1 to 0.3) | 7    | (2.8 to 13.3)  | 0.1 | (0.0 to 0.2) |
| Saudi Arabia | Male   | 5 to 9   | 0.8 | (0.5 to 1.1) | 4.8  | (2.8 to 7.6)   | 0.1 | (0.0 to 0.1) |
| Saudi Arabia | Male   | 10 to 14 | 1.6 | (0.9 to 2.2) | 7.4  | (4.1 to 11.4)  | 0.1 | (0.1 to 0.1) |
| Saudi Arabia | Male   | 15 to 19 | 2.5 | (1.4 to 3.7) | 12.5 | (7.4 to 19.5)  | 0.2 | (0.1 to 0.3) |
| Saudi Arabia | Female | 1 to 4   | 0.1 | (0.1 to 0.1) | 6.5  | (2.5 to 11.8)  | 0.1 | (0.0 to 0.1) |
| Saudi Arabia | Female | 5 to 9   | 0.3 | (0.2 to 0.5) | 6.1  | (3.6 to 9.3)   | 0.1 | (0.0 to 0.1) |
| Saudi Arabia | Female | 10 to 14 | 0.7 | (0.4 to 1.0) | 9.6  | (5.5 to 14.9)  | 0.1 | (0.1 to 0.2) |
| Saudi Arabia | Female | 15 to 19 | 1.2 | (0.6 to 1.8) | 12.1 | (7.0 to 19.4)  | 0.2 | (0.1 to 0.3) |
| Saudi Arabia | Both   | 1 to 4   | 0.2 | (0.1 to 0.2) | 6.7  | (3.1 to 11.7)  | 0.1 | (0.0 to 0.1) |
| Saudi Arabia | Both   | 5 to 9   | 0.6 | (0.4 to 0.7) | 5.4  | (3.7 to 7.5)   | 0.1 | (0.0 to 0.1) |
| Saudi Arabia | Both   | 10 to 14 | 1.2 | (0.8 to 1.6) | 8.5  | (5.6 to 11.4)  | 0.1 | (0.1 to 0.2) |
| Saudi Arabia | Both   | 15 to 19 | 1.9 | (1.3 to 2.7) | 12.3 | (8.5 to 17.0)  | 0.2 | (0.1 to 0.2) |
| Syria        | Male   | 1 to 4   | 0.5 | (0.3 to 0.7) | 6.4  | (1.3 to 18.6)  | 0.1 | (0.0 to 0.2) |
| Syria        | Male   | 5 to 9   | 1.6 | (1.0 to 2.2) | 4.7  | (1.3 to 13.8)  | 0.1 | (0.0 to 0.2) |
| Syria        | Male   | 10 to 14 | 3.1 | (1.9 to 4.3) | 6.9  | (2.4 to 15.8)  | 0.1 | (0.0 to 0.2) |
| Syria        | Male   | 15 to 19 | 4.7 | (2.6 to 7.0) | 35.1 | (9.2 to 81.5)  | 0.5 | (0.1 to 1.2) |
| Syria        | Female | 1 to 4   | 0.3 | (0.1 to 0.5) | 24.7 | (3.3 to 79.9)  | 0.3 | (0.0 to 0.9) |
| Syria        | Female | 5 to 9   | 0.9 | (0.5 to 1.5) | 7.2  | (1.5 to 17.1)  | 0.1 | (0.0 to 0.2) |
| Syria        | Female | 10 to 14 | 1.9 | (1.0 to 2.8) | 16.6 | (4.3 to 38.8)  | 0.2 | (0.1 to 0.5) |
| Syria        | Female | 15 to 19 | 3   | (1.6 to 4.8) | 40   | (11.0 to 81.2) | 0.6 | (0.2 to 1.2) |
| Syria        | Both   | 1 to 4   | 0.4 | (0.3 to 0.5) | 15.3 | (2.9 to 44.7)  | 0.2 | (0.0 to 0.5) |
| Syria        | Both   | 5 to 9   | 1.3 | (0.9 to 1.7) | 5.9  | (2.0 to 13.1)  | 0.1 | (0.0 to 0.2) |
| Syria        | Both   | 10 to 14 | 2.5 | (1.8 to 3.4) | 11.6 | (4.6 to 23.7)  | 0.2 | (0.1 to 0.3) |
| Syria        | Both   | 15 to 19 | 3.8 | (2.7 to 5.4) | 37.4 | (14.3 to 69.2) | 0.5 | (0.2 to 1.0) |
| Tunisia      | Male   | 1 to 4   | 0.5 | (0.3 to 0.8) | 8.2  | (2.1 to 19.6)  | 0.1 | (0.0 to 0.2) |

|                      |        |          |     |              |      |               |     |              |
|----------------------|--------|----------|-----|--------------|------|---------------|-----|--------------|
| Tunisia              | Male   | 5 to 9   | 1.6 | (1.0 to 2.3) | 4.1  | (1.5 to 9.0)  | 0   | (0.0 to 0.1) |
| Tunisia              | Male   | 10 to 14 | 3   | (1.9 to 4.4) | 7.4  | (2.5 to 14.9) | 0.1 | (0.0 to 0.2) |
| Tunisia              | Male   | 15 to 19 | 4.6 | (2.9 to 6.8) | 15.2 | (5.6 to 31.6) | 0.2 | (0.1 to 0.4) |
| Tunisia              | Female | 1 to 4   | 0.3 | (0.2 to 0.5) | 15.2 | (2.9 to 36.7) | 0.2 | (0.0 to 0.4) |
| Tunisia              | Female | 5 to 9   | 0.9 | (0.5 to 1.4) | 4.8  | (1.5 to 10.8) | 0.1 | (0.0 to 0.1) |
| Tunisia              | Female | 10 to 14 | 1.9 | (1.1 to 2.7) | 8.1  | (2.5 to 16.6) | 0.1 | (0.0 to 0.2) |
| Tunisia              | Female | 15 to 19 | 3   | (1.7 to 4.4) | 11.2 | (3.7 to 23.3) | 0.2 | (0.0 to 0.3) |
| Tunisia              | Both   | 1 to 4   | 0.4 | (0.3 to 0.6) | 11.6 | (3.5 to 24.4) | 0.1 | (0.0 to 0.3) |
| Tunisia              | Both   | 5 to 9   | 1.3 | (0.9 to 1.7) | 4.5  | (1.7 to 8.4)  | 0.1 | (0.0 to 0.1) |
| Tunisia              | Both   | 10 to 14 | 2.5 | (1.7 to 3.3) | 7.8  | (3.2 to 13.2) | 0.1 | (0.0 to 0.2) |
| Tunisia              | Both   | 15 to 19 | 3.8 | (2.7 to 5.1) | 13.3 | (6.1 to 23.0) | 0.2 | (0.1 to 0.3) |
| Turkey               | Male   | 1 to 4   | 0.5 | (0.3 to 0.7) | 1.6  | (0.6 to 3.8)  | 0   | (0.0 to 0.0) |
| Turkey               | Male   | 5 to 9   | 1.6 | (1.0 to 2.1) | 6.6  | (2.9 to 14.4) | 0.1 | (0.0 to 0.2) |
| Turkey               | Male   | 10 to 14 | 3   | (2.0 to 4.1) | 6.5  | (3.1 to 10.8) | 0.1 | (0.0 to 0.1) |
| Turkey               | Male   | 15 to 19 | 4.5 | (2.9 to 6.6) | 17.2 | (8.5 to 32.0) | 0.2 | (0.1 to 0.5) |
| Turkey               | Female | 1 to 4   | 0.3 | (0.2 to 0.5) | 4    | (0.7 to 15.1) | 0   | (0.0 to 0.2) |
| Turkey               | Female | 5 to 9   | 1   | (0.6 to 1.5) | 5.3  | (2.4 to 10.2) | 0.1 | (0.0 to 0.1) |
| Turkey               | Female | 10 to 14 | 2.1 | (1.3 to 2.9) | 7.2  | (3.9 to 12.7) | 0.1 | (0.0 to 0.2) |
| Turkey               | Female | 15 to 19 | 3.3 | (1.9 to 4.8) | 8.4  | (4.6 to 15.4) | 0.1 | (0.1 to 0.2) |
| Turkey               | Both   | 1 to 4   | 0.4 | (0.3 to 0.5) | 2.8  | (0.8 to 9.3)  | 0   | (0.0 to 0.1) |
| Turkey               | Both   | 5 to 9   | 1.3 | (1.0 to 1.6) | 6    | (3.3 to 11.2) | 0.1 | (0.0 to 0.1) |
| Turkey               | Both   | 10 to 14 | 2.6 | (1.9 to 3.3) | 6.8  | (4.5 to 10.2) | 0.1 | (0.1 to 0.1) |
| Turkey               | Both   | 15 to 19 | 3.9 | (2.8 to 5.2) | 12.9 | (7.9 to 20.9) | 0.2 | (0.1 to 0.3) |
| United Arab Emirates | Male   | 1 to 4   | 0.5 | (0.3 to 0.7) | 2.6  | (0.6 to 6.8)  | 0   | (0.0 to 0.1) |
| United Arab Emirates | Male   | 5 to 9   | 1.6 | (1.0 to 2.2) | 1.7  | (0.6 to 4.1)  | 0   | (0.0 to 0.0) |
| United Arab Emirates | Male   | 10 to 14 | 3.1 | (2.0 to 4.4) | 3.8  | (1.5 to 8.0)  | 0   | (0.0 to 0.1) |
| United Arab Emirates | Male   | 15 to 19 | 4.7 | (2.8 to 6.9) | 15.9 | (6.4 to 32.7) | 0.2 | (0.1 to 0.5) |
| United Arab Emirates | Female | 1 to 4   | 0.3 | (0.2 to 0.4) | 4.7  | (0.5 to 15.6) | 0.1 | (0.0 to 0.2) |
| United Arab Emirates | Female | 5 to 9   | 1   | (0.6 to 1.4) | 2.1  | (0.5 to 5.8)  | 0   | (0.0 to 0.1) |
| United Arab Emirates | Female | 10 to 14 | 2   | (1.2 to 2.8) | 4.4  | (1.0 to 10.8) | 0.1 | (0.0 to 0.1) |
| United Arab Emirates | Female | 15 to 19 | 3.1 | (1.8 to 4.7) | 9.8  | (2.6 to 20.3) | 0.1 | (0.0 to 0.3) |
| United Arab Emirates | Both   | 1 to 4   | 0.4 | (0.3 to 0.5) | 3.6  | (0.9 to 9.8)  | 0   | (0.0 to 0.1) |
| United Arab Emirates | Both   | 5 to 9   | 1.3 | (0.9 to 1.7) | 1.9  | (0.7 to 4.4)  | 0   | (0.0 to 0.1) |



|                      |        |          |      |               |      |                 |     |              |
|----------------------|--------|----------|------|---------------|------|-----------------|-----|--------------|
| United Arab Emirates | Both   | 10 to 14 | 2.5  | (1.8 to 3.3)  | 4.1  | (1.5 to 8.2)    | 0   | (0.0 to 0.1) |
| United Arab Emirates | Both   | 15 to 19 | 4.1  | (2.8 to 5.6)  | 13.5 | (6.3 to 25.2)   | 0.2 | (0.1 to 0.4) |
| Yemen                | Male   | 1 to 4   | 0.5  | (0.3 to 0.7)  | 34.3 | (9.4 to 85.9)   | 0.4 | (0.1 to 1.0) |
| Yemen                | Male   | 5 to 9   | 1.6  | (1.1 to 2.2)  | 17.8 | (6.2 to 41.4)   | 0.2 | (0.1 to 0.5) |
| Yemen                | Male   | 10 to 14 | 3.2  | (2.1 to 4.4)  | 26.3 | (8.8 to 56.1)   | 0.3 | (0.1 to 0.7) |
| Yemen                | Male   | 15 to 19 | 4.9  | (3.0 to 6.9)  | 47.7 | (15.3 to 102.2) | 0.7 | (0.2 to 1.5) |
| Yemen                | Female | 1 to 4   | 0.3  | (0.2 to 0.4)  | 53.1 | (12.5 to 144.3) | 0.6 | (0.1 to 1.7) |
| Yemen                | Female | 5 to 9   | 1    | (0.6 to 1.4)  | 19.5 | (5.9 to 48.3)   | 0.2 | (0.1 to 0.6) |
| Yemen                | Female | 10 to 14 | 2    | (1.3 to 2.9)  | 31.1 | (10.3 to 72.1)  | 0.4 | (0.1 to 1.0) |
| Yemen                | Female | 15 to 19 | 3.2  | (2.0 to 4.7)  | 42   | (13.3 to 103.2) | 0.6 | (0.2 to 1.5) |
| Yemen                | Both   | 1 to 4   | 0.4  | (0.3 to 0.6)  | 43.5 | (14.8 to 94.4)  | 0.5 | (0.2 to 1.1) |
| Yemen                | Both   | 5 to 9   | 1.3  | (1.0 to 1.7)  | 18.6 | (7.8 to 37.7)   | 0.2 | (0.1 to 0.5) |
| Yemen                | Both   | 10 to 14 | 2.6  | (2.0 to 3.4)  | 28.7 | (12.7 to 53.5)  | 0.4 | (0.2 to 0.7) |
|                      |        |          |      |               |      |                 |     |              |
| Yemen                | Both   | 15 to 19 | 4.1  | (3.0 to 5.4)  | 44.9 | (19.9 to 86.0)  | 0.6 | (0.3 to 1.2) |
| Afghanistan          | Male   | 1 to 4   | 0.5  | (0.3 to 0.7)  | 5.3  | (0.9 to 17.4)   | 0.1 | (0.0 to 0.2) |
| Afghanistan          | Male   | 5 to 9   | 1.5  | (1.0 to 2.1)  | 4.8  | (1.2 to 14.6)   | 0.1 | (0.0 to 0.2) |
| Afghanistan          | Male   | 10 to 14 | 2.9  | (1.9 to 4.1)  | 9.8  | (2.6 to 25.3)   | 0.1 | (0.0 to 0.3) |
| Afghanistan          | Male   | 15 to 19 | 4.5  | (2.7 to 6.5)  | 17.5 | (5.4 to 41.6)   | 0.2 | (0.1 to 0.6) |
| Afghanistan          | Female | 1 to 4   | 0.3  | (0.2 to 0.5)  | 2.7  | (0.5 to 9.6)    | 0   | (0.0 to 0.1) |
| Afghanistan          | Female | 5 to 9   | 1    | (0.6 to 1.5)  | 5.3  | (1.2 to 16.1)   | 0.1 | (0.0 to 0.2) |
| Afghanistan          | Female | 10 to 14 | 2    | (1.2 to 3.0)  | 27   | (6.4 to 82.8)   | 0.4 | (0.1 to 1.1) |
| Afghanistan          | Female | 15 to 19 | 3.3  | (1.8 to 4.9)  | 47.9 | (12.7 to 158.4) | 0.7 | (0.2 to 2.3) |
| Afghanistan          | Both   | 1 to 4   | 0.4  | (0.3 to 0.5)  | 4.1  | (0.9 to 10.2)   | 0   | (0.0 to 0.1) |
| Afghanistan          | Both   | 5 to 9   | 1.3  | (0.9 to 1.7)  | 5.1  | (1.8 to 11.0)   | 0.1 | (0.0 to 0.1) |
| Afghanistan          | Both   | 10 to 14 | 2.5  | (1.8 to 3.3)  | 18.2 | (6.0 to 45.5)   | 0.2 | (0.1 to 0.6) |
| Afghanistan          | Both   | 15 to 19 | 3.9  | (2.7 to 5.3)  | 32.4 | (11.3 to 87.5)  | 0.5 | (0.2 to 1.3) |
| Bangladesh           | Male   | 1 to 4   | 0.8  | (0.5 to 1.3)  | 1.2  | (0.4 to 2.7)    | 0   | (0.0 to 0.0) |
| Bangladesh           | Male   | 5 to 9   | 2.9  | (1.8 to 4.1)  | 0.5  | (0.3 to 0.8)    | 0   | (0.0 to 0.0) |
| Bangladesh           | Male   | 10 to 14 | 6.3  | (4.2 to 8.6)  | 8.1  | (3.3 to 15.0)   | 0.1 | (0.0 to 0.2) |
| Bangladesh           | Male   | 15 to 19 | 10.8 | (7.1 to 14.6) | 26.1 | (9.2 to 54.2)   | 0.4 | (0.1 to 0.8) |
| Bangladesh           | Female | 1 to 4   | 0.6  | (0.4 to 0.9)  | 1.3  | (0.3 to 3.7)    | 0   | (0.0 to 0.0) |
| Bangladesh           | Female | 5 to 9   | 2.1  | (1.2 to 3.2)  | 3.2  | (0.8 to 8.0)    | 0   | (0.0 to 0.1) |

|            |        |          |      |               |      |                |     |              |
|------------|--------|----------|------|---------------|------|----------------|-----|--------------|
| Bangladesh | Female | 10 to 14 | 4.6  | (2.9 to 6.5)  | 3.9  | (1.2 to 8.7)   | 0   | (0.0 to 0.1) |
| Bangladesh | Female | 15 to 19 | 7.8  | (5.0 to 10.9) | 7.3  | (2.3 to 15.0)  | 0.1 | (0.0 to 0.2) |
| Bangladesh | Both   | 1 to 4   | 0.7  | (0.5 to 1.0)  | 1.3  | (0.4 to 2.6)   | 0   | (0.0 to 0.0) |
| Bangladesh | Both   | 5 to 9   | 2.5  | (1.8 to 3.3)  | 1.8  | (0.6 to 4.2)   | 0   | (0.0 to 0.0) |
| Bangladesh | Both   | 10 to 14 | 5.4  | (4.0 to 7.0)  | 6.1  | (2.8 to 10.3)  | 0.1 | (0.0 to 0.1) |
| Bangladesh | Both   | 15 to 19 | 9.3  | (6.9 to 11.9) | 16.9 | (7.0 to 32.0)  | 0.2 | (0.1 to 0.4) |
| Bhutan     | Male   | 1 to 4   | 0.8  | (0.4 to 1.3)  | 14.8 | (4.3 to 37.2)  | 0.2 | (0.0 to 0.4) |
| Bhutan     | Male   | 5 to 9   | 2.8  | (1.5 to 4.2)  | 3.8  | (1.7 to 8.2)   | 0   | (0.0 to 0.1) |
| Bhutan     | Male   | 10 to 14 | 6.1  | (3.9 to 8.8)  | 11   | (5.0 to 21.8)  | 0.1 | (0.1 to 0.3) |
| Bhutan     | Male   | 15 to 19 | 10.3 | (6.7 to 14.9) | 22   | (9.3 to 43.8)  | 0.3 | (0.1 to 0.6) |
| Bhutan     | Female | 1 to 4   | 0.6  | (0.3 to 0.9)  | 12.2 | (3.4 to 32.5)  | 0.1 | (0.0 to 0.4) |
| Bhutan     | Female | 5 to 9   | 2    | (1.2 to 3.0)  | 10   | (3.7 to 23.1)  | 0.1 | (0.0 to 0.3) |
| Bhutan     | Female | 10 to 14 | 4.5  | (2.9 to 6.7)  | 8    | (3.0 to 18.6)  | 0.1 | (0.0 to 0.2) |
| Bhutan     | Female | 15 to 19 | 7.7  | (4.9 to 11.8) | 13.1 | (4.8 to 28.0)  | 0.2 | (0.1 to 0.4) |
| Bhutan     | Both   | 1 to 4   | 0.7  | (0.5 to 1.0)  | 13.5 | (5.2 to 29.4)  | 0.2 | (0.1 to 0.3) |
| Bhutan     | Both   | 5 to 9   | 2.4  | (1.6 to 3.2)  | 6.9  | (3.3 to 13.8)  | 0.1 | (0.0 to 0.2) |
| Bhutan     | Both   | 10 to 14 | 5.3  | (3.9 to 6.9)  | 9.5  | (5.1 to 17.2)  | 0.1 | (0.1 to 0.2) |
| Bhutan     | Both   | 15 to 19 | 9    | (6.6 to 11.8) | 17.6 | (8.7 to 32.2)  | 0.2 | (0.1 to 0.4) |
| India      | Male   | 1 to 4   | 0.8  | (0.5 to 1.3)  | 15.9 | (6.1 to 34.3)  | 0.2 | (0.1 to 0.4) |
| India      | Male   | 5 to 9   | 2.8  | (1.6 to 4.1)  | 9.9  | (4.4 to 19.6)  | 0.1 | (0.1 to 0.2) |
| India      | Male   | 10 to 14 | 6.1  | (3.8 to 9.1)  | 14.1 | (6.9 to 26.6)  | 0.2 | (0.1 to 0.3) |
| India      | Male   | 15 to 19 | 10.4 | (6.4 to 15.5) | 27.8 | (12.4 to 52.1) | 0.4 | (0.2 to 0.7) |
| India      | Female | 1 to 4   | 0.5  | (0.3 to 0.9)  | 13   | (4.8 to 28.4)  | 0.2 | (0.1 to 0.3) |
| India      | Female | 5 to 9   | 2    | (1.1 to 2.9)  | 14.2 | (5.7 to 31.5)  | 0.2 | (0.1 to 0.4) |
| India      | Female | 10 to 14 | 4.4  | (2.8 to 6.1)  | 10.9 | (4.5 to 24.6)  | 0.1 | (0.1 to 0.3) |
| India      | Female | 15 to 19 | 7.3  | (4.8 to 10.1) | 20.1 | (8.0 to 42.8)  | 0.3 | (0.1 to 0.6) |
| India      | Both   | 1 to 4   | 0.7  | (0.5 to 0.9)  | 14.5 | (7.3 to 26.8)  | 0.2 | (0.1 to 0.3) |
| India      | Both   | 5 to 9   | 2.4  | (1.7 to 3.2)  | 11.9 | (6.2 to 20.5)  | 0.1 | (0.1 to 0.3) |
| India      | Both   | 10 to 14 | 5.3  | (3.9 to 6.9)  | 12.6 | (7.1 to 20.4)  | 0.2 | (0.1 to 0.3) |
| India      | Both   | 15 to 19 | 8.9  | (6.5 to 11.9) | 24.1 | (13.7 to 38.5) | 0.3 | (0.2 to 0.5) |
| Nepal      | Male   | 1 to 4   | 0.8  | (0.5 to 1.2)  | 6.3  | (2.0 to 15.7)  | 0.1 | (0.0 to 0.2) |
| Nepal      | Male   | 5 to 9   | 2.9  | (1.7 to 4.2)  | 2.5  | (1.0 to 5.2)   | 0   | (0.0 to 0.1) |
| Nepal      | Male   | 10 to 14 | 6.3  | (4.0 to 8.9)  | 7.7  | (3.2 to 15.7)  | 0.1 | (0.0 to 0.2) |

|          |        |          |      |               |       |                 |     |              |
|----------|--------|----------|------|---------------|-------|-----------------|-----|--------------|
| Nepal    | Male   | 15 to 19 | 10.9 | (7.1 to 15.3) | 18.4  | (7.3 to 39.5)   | 0.2 | (0.1 to 0.5) |
| Nepal    | Female | 1 to 4   | 0.6  | (0.3 to 0.9)  | 3.8   | (1.0 to 10.1)   | 0   | (0.0 to 0.1) |
| Nepal    | Female | 5 to 9   | 2    | (1.2 to 3.0)  | 5.2   | (1.6 to 13.7)   | 0.1 | (0.0 to 0.2) |
| Nepal    | Female | 10 to 14 | 4.4  | (3.0 to 6.4)  | 4.8   | (1.8 to 11.9)   | 0.1 | (0.0 to 0.1) |
| Nepal    | Female | 15 to 19 | 7.5  | (4.9 to 10.9) | 6.9   | (2.9 to 14.5)   | 0.1 | (0.0 to 0.2) |
| Nepal    | Both   | 1 to 4   | 0.7  | (0.5 to 1.0)  | 5.1   | (2.0 to 11.0)   | 0.1 | (0.0 to 0.1) |
| Nepal    | Both   | 5 to 9   | 2.5  | (1.8 to 3.3)  | 3.8   | (1.8 to 7.9)    | 0   | (0.0 to 0.1) |
| Nepal    | Both   | 10 to 14 | 5.4  | (4.0 to 7.1)  | 6.3   | (3.2 to 11.2)   | 0.1 | (0.0 to 0.1) |
| Nepal    | Both   | 15 to 19 | 9.2  | (6.8 to 12.0) | 12.5  | (6.3 to 22.7)   | 0.2 | (0.1 to 0.3) |
| Pakistan | Male   | 1 to 4   | 0.8  | (0.5 to 1.3)  | 16    | (5.1 to 40.3)   | 0.2 | (0.1 to 0.5) |
| Pakistan | Male   | 5 to 9   | 2.9  | (1.7 to 4.2)  | 6.7   | (2.4 to 15.4)   | 0.1 | (0.0 to 0.2) |
| Pakistan | Male   | 10 to 14 | 6.2  | (4.1 to 8.9)  | 15    | (6.3 to 30.1)   | 0.2 | (0.1 to 0.4) |
| Pakistan | Male   | 15 to 19 | 10.6 | (6.9 to 15.0) | 23.3  | (9.3 to 46.6)   | 0.3 | (0.1 to 0.6) |
| Pakistan | Female | 1 to 4   | 0.6  | (0.3 to 0.9)  | 0.7   | (0.2 to 2.2)    | 0   | (0.0 to 0.0) |
| Pakistan | Female | 5 to 9   | 2    | (1.3 to 2.9)  | 9.1   | (1.7 to 36.0)   | 0.1 | (0.0 to 0.5) |
| Pakistan | Female | 10 to 14 | 4.2  | (2.8 to 5.9)  | 11.2  | (3.7 to 29.3)   | 0.1 | (0.0 to 0.4) |
| Pakistan | Female | 15 to 19 | 6.9  | (4.6 to 10.0) | 28.7  | (9.6 to 69.2)   | 0.4 | (0.1 to 1.0) |
| Pakistan | Both   | 1 to 4   | 0.7  | (0.5 to 1.0)  | 8.7   | (2.9 to 21.2)   | 0.1 | (0.0 to 0.2) |
| Pakistan | Both   | 5 to 9   | 2.4  | (1.7 to 3.2)  | 7.8   | (2.7 to 21.5)   | 0.1 | (0.0 to 0.3) |
| Pakistan | Both   | 10 to 14 | 5.3  | (3.9 to 6.8)  | 13.2  | (6.4 to 24.4)   | 0.2 | (0.1 to 0.3) |
| Pakistan | Both   | 15 to 19 | 8.8  | (6.5 to 11.5) | 25.9  | (13.1 to 46.8)  | 0.4 | (0.2 to 0.7) |
| Angola   | Male   | 1 to 4   | 0.7  | (0.4 to 1.0)  | 104.3 | (15.3 to 336.3) | 1.2 | (0.2 to 4.0) |
| Angola   | Male   | 5 to 9   | 2    | (1.3 to 2.9)  | 15.7  | (5.7 to 35.7)   | 0.2 | (0.1 to 0.4) |
| Angola   | Male   | 10 to 14 | 4    | (2.6 to 5.6)  | 13.3  | (5.7 to 26.8)   | 0.2 | (0.1 to 0.3) |
| Angola   | Male   | 15 to 19 | 6.3  | (4.0 to 9.1)  | 28.4  | (11.5 to 56.3)  | 0.4 | (0.1 to 0.8) |
| Angola   | Female | 1 to 4   | 0.5  | (0.3 to 0.7)  | 63.9  | (5.9 to 195.2)  | 0.8 | (0.1 to 2.3) |
| Angola   | Female | 5 to 9   | 1.5  | (1.0 to 2.1)  | 19.2  | (5.1 to 48.2)   | 0.2 | (0.1 to 0.6) |
| Angola   | Female | 10 to 14 | 3.1  | (2.1 to 4.3)  | 13.8  | (4.9 to 32.5)   | 0.2 | (0.1 to 0.4) |
| Angola   | Female | 15 to 19 | 4.9  | (3.2 to 6.9)  | 23.7  | (9.7 to 51.1)   | 0.3 | (0.1 to 0.7) |
| Angola   | Both   | 1 to 4   | 0.6  | (0.4 to 0.8)  | 84.3  | (13.0 to 209.2) | 1   | (0.2 to 2.5) |
| Angola   | Both   | 5 to 9   | 1.8  | (1.3 to 2.3)  | 17.4  | (6.5 to 37.1)   | 0.2 | (0.1 to 0.5) |
| Angola   | Both   | 10 to 14 | 3.5  | (2.6 to 4.6)  | 13.6  | (6.8 to 25.9)   | 0.2 | (0.1 to 0.3) |
| Angola   | Both   | 15 to 19 | 5.6  | (4.1 to 7.4)  | 26    | (13.7 to 46.1)  | 0.4 | (0.2 to 0.7) |

|                                  |        |          |     |               |      |                |     |              |
|----------------------------------|--------|----------|-----|---------------|------|----------------|-----|--------------|
| Central African Republic         | Male   | 1 to 4   | 0.6 | (0.3 to 0.9)  | 35.3 | (2.8 to 125.8) | 0.4 | (0.0 to 1.5) |
| Central African Republic         | Male   | 5 to 9   | 2   | (1.3 to 3.0)  | 7    | (1.4 to 20.6)  | 0.1 | (0.0 to 0.3) |
| Central African Republic         | Male   | 10 to 14 | 4.2 | (2.7 to 6.0)  | 5.3  | (1.5 to 14.0)  | 0.1 | (0.0 to 0.2) |
| Central African Republic         | Male   | 15 to 19 | 6.7 | (4.0 to 9.8)  | 9.8  | (2.6 to 22.5)  | 0.1 | (0.0 to 0.3) |
| Central African Republic         | Female | 1 to 4   | 0.5 | (0.3 to 0.8)  | 78.8 | (3.3 to 285.4) | 0.9 | (0.0 to 3.4) |
| Central African Republic         | Female | 5 to 9   | 1.6 | (1.1 to 2.3)  | 21.6 | (2.7 to 65.0)  | 0.3 | (0.0 to 0.8) |
| Central African Republic         | Female | 10 to 14 | 3.2 | (2.2 to 4.6)  | 13.4 | (2.8 to 40.4)  | 0.2 | (0.0 to 0.5) |
| Central African Republic         | Female | 15 to 19 | 5   | (3.1 to 7.4)  | 24.3 | (5.4 to 70.1)  | 0.3 | (0.1 to 1.0) |
| Central African Republic         | Both   | 1 to 4   | 0.6 | (0.4 to 0.8)  | 56.9 | (4.7 to 161.9) | 0.7 | (0.1 to 1.9) |
| Central African Republic         | Both   | 5 to 9   | 1.8 | (1.3 to 2.3)  | 14.3 | (2.7 to 36.7)  | 0.2 | (0.0 to 0.5) |
| Central African Republic         | Both   | 10 to 14 | 3.7 | (2.7 to 4.8)  | 9.4  | (2.7 to 23.0)  | 0.1 | (0.0 to 0.3) |
| Central African Republic         | Both   | 15 to 19 | 5.9 | (4.1 to 7.7)  | 17.1 | (5.5 to 39.4)  | 0.2 | (0.1 to 0.6) |
| Congo                            | Male   | 1 to 4   | 0.7 | (0.4 to 1.0)  | 36.6 | (7.1 to 107.3) | 0.4 | (0.1 to 1.3) |
| Congo                            | Male   | 5 to 9   | 2   | (1.2 to 3.0)  | 8.6  | (3.2 to 18.9)  | 0.1 | (0.0 to 0.2) |
| Congo                            | Male   | 10 to 14 | 4.1 | (2.6 to 5.9)  | 8    | (3.9 to 15.0)  | 0.1 | (0.0 to 0.2) |
| Congo                            | Male   | 15 to 19 | 6.5 | (4.0 to 10.0) | 20.2 | (9.0 to 38.3)  | 0.3 | (0.1 to 0.5) |
| Congo                            | Female | 1 to 4   | 0.5 | (0.3 to 0.7)  | 17.8 | (3.7 to 47.4)  | 0.2 | (0.0 to 0.6) |
| Congo                            | Female | 5 to 9   | 1.6 | (1.0 to 2.3)  | 6.6  | (2.4 to 14.6)  | 0.1 | (0.0 to 0.2) |
| Congo                            | Female | 10 to 14 | 3.1 | (2.1 to 4.4)  | 5.5  | (2.3 to 11.8)  | 0.1 | (0.0 to 0.2) |
| Congo                            | Female | 15 to 19 | 4.9 | (3.2 to 7.0)  | 11.2 | (5.0 to 22.3)  | 0.2 | (0.1 to 0.3) |
| Congo                            | Both   | 1 to 4   | 0.6 | (0.4 to 0.8)  | 27.3 | (6.9 to 63.5)  | 0.3 | (0.1 to 0.8) |
| Congo                            | Both   | 5 to 9   | 1.8 | (1.3 to 2.4)  | 7.6  | (3.7 to 14.3)  | 0.1 | (0.0 to 0.2) |
| Congo                            | Both   | 10 to 14 | 3.6 | (2.7 to 4.7)  | 6.8  | (3.8 to 11.5)  | 0.1 | (0.0 to 0.1) |
| Congo                            | Both   | 15 to 19 | 5.7 | (4.2 to 7.7)  | 15.7 | (8.6 to 26.3)  | 0.2 | (0.1 to 0.4) |
| Democratic Republic of the Congo | Male   | 1 to 4   | 0.7 | (0.4 to 1.1)  | 90.2 | (7.4 to 335.3) | 1.1 | (0.1 to 4.0) |
| Democratic Republic of the Congo | Male   | 5 to 9   | 2.2 | (1.4 to 3.1)  | 15.5 | (3.6 to 43.8)  | 0.2 | (0.0 to 0.5) |
| Democratic Republic of the Congo | Male   | 10 to 14 | 4.2 | (2.8 to 6.0)  | 11.5 | (3.2 to 26.4)  | 0.1 | (0.0 to 0.3) |
| Democratic Republic of the Congo | Male   | 15 to 19 | 6.6 | (4.0 to 9.5)  | 24.8 | (5.1 to 54.0)  | 0.3 | (0.1 to 0.8) |
| Democratic Republic of the Congo | Female | 1 to 4   | 0.5 | (0.3 to 0.7)  | 58.4 | (2.4 to 173.6) | 0.7 | (0.0 to 2.1) |
| Democratic Republic of the Congo | Female | 5 to 9   | 1.6 | (0.9 to 2.3)  | 18.1 | (2.8 to 46.4)  | 0.2 | (0.0 to 0.6) |
| Democratic Republic of the Congo | Female | 10 to 14 | 3.1 | (1.9 to 4.5)  | 11.5 | (2.9 to 27.5)  | 0.1 | (0.0 to 0.4) |
| Democratic Republic of the Congo | Female | 15 to 19 | 4.8 | (2.9 to 6.8)  | 22.7 | (7.2 to 51.3)  | 0.3 | (0.1 to 0.7) |
| Democratic Republic of the Congo | Both   | 1 to 4   | 0.6 | (0.4 to 0.8)  | 74.4 | (5.9 to 204.1) | 0.9 | (0.1 to 2.4) |

|                                  |        |          |     |               |       |                 |     |              |
|----------------------------------|--------|----------|-----|---------------|-------|-----------------|-----|--------------|
| Democratic Republic of the Congo | Both   | 5 to 9   | 1.9 | (1.3 to 2.4)  | 16.8  | (4.7 to 37.3)   | 0.2 | (0.1 to 0.5) |
| Democratic Republic of the Congo | Both   | 10 to 14 | 3.7 | (2.7 to 4.7)  | 11.5  | (4.4 to 22.0)   | 0.1 | (0.1 to 0.3) |
| Democratic Republic of the Congo | Both   | 15 to 19 | 5.7 | (4.1 to 7.6)  | 23.8  | (9.6 to 42.9)   | 0.3 | (0.1 to 0.6) |
| Equatorial Guinea                | Male   | 1 to 4   | 0.6 | (0.3 to 1.0)  | 112.1 | (12.0 to 419.2) | 1.3 | (0.1 to 5.0) |
| Equatorial Guinea                | Male   | 5 to 9   | 1.9 | (1.1 to 2.9)  | 24.8  | (5.2 to 73.4)   | 0.3 | (0.1 to 0.9) |
| Equatorial Guinea                | Male   | 10 to 14 | 3.9 | (2.5 to 5.6)  | 16.1  | (5.2 to 44.9)   | 0.2 | (0.1 to 0.6) |
| Equatorial Guinea                | Male   | 15 to 19 | 6.2 | (3.9 to 9.0)  | 26.3  | (10.7 to 53.2)  | 0.4 | (0.1 to 0.8) |
| Equatorial Guinea                | Female | 1 to 4   | 0.5 | (0.3 to 0.7)  | 68.8  | (2.4 to 265.5)  | 0.8 | (0.0 to 3.1) |
| Equatorial Guinea                | Female | 5 to 9   | 1.5 | (1.0 to 2.1)  | 17.1  | (2.4 to 53.7)   | 0.2 | (0.0 to 0.7) |
| Equatorial Guinea                | Female | 10 to 14 | 3   | (2.1 to 4.1)  | 10.4  | (2.9 to 28.8)   | 0.1 | (0.0 to 0.4) |
| Equatorial Guinea                | Female | 15 to 19 | 4.8 | (3.2 to 6.7)  | 21.7  | (7.0 to 54.7)   | 0.3 | (0.1 to 0.8) |
| Equatorial Guinea                | Both   | 1 to 4   | 0.5 | (0.4 to 0.7)  | 90.7  | (9.3 to 270.7)  | 1.1 | (0.1 to 3.2) |
| Equatorial Guinea                | Both   | 5 to 9   | 1.7 | (1.2 to 2.2)  | 20.9  | (5.1 to 54.9)   | 0.3 | (0.1 to 0.7) |
| Equatorial Guinea                | Both   | 10 to 14 | 3.5 | (2.6 to 4.4)  | 13.3  | (5.2 to 31.7)   | 0.2 | (0.1 to 0.4) |
| Equatorial Guinea                | Both   | 15 to 19 | 5.5 | (4.0 to 7.1)  | 24    | (11.5 to 48.1)  | 0.3 | (0.2 to 0.7) |
| Gabon                            | Male   | 1 to 4   | 0.6 | (0.4 to 1.0)  | 46.9  | (7.4 to 136.9)  | 0.6 | (0.1 to 1.6) |
| Gabon                            | Male   | 5 to 9   | 2   | (1.2 to 2.9)  | 12.8  | (3.7 to 30.2)   | 0.2 | (0.0 to 0.4) |
| Gabon                            | Male   | 10 to 14 | 4.1 | (2.5 to 5.8)  | 13.3  | (5.1 to 27.8)   | 0.2 | (0.1 to 0.4) |
| Gabon                            | Male   | 15 to 19 | 6.6 | (3.8 to 9.6)  | 39.6  | (15.7 to 80.5)  | 0.6 | (0.2 to 1.1) |
| Gabon                            | Female | 1 to 4   | 0.5 | (0.3 to 0.7)  | 22.6  | (3.1 to 67.0)   | 0.3 | (0.0 to 0.8) |
| Gabon                            | Female | 5 to 9   | 1.5 | (1.0 to 2.2)  | 7.9   | (2.5 to 18.9)   | 0.1 | (0.0 to 0.2) |
| Gabon                            | Female | 10 to 14 | 3.2 | (2.1 to 4.4)  | 7.1   | (2.4 to 17.3)   | 0.1 | (0.0 to 0.2) |
| Gabon                            | Female | 15 to 19 | 5   | (3.2 to 7.6)  | 16.8  | (6.7 to 37.2)   | 0.2 | (0.1 to 0.5) |
| Gabon                            | Both   | 1 to 4   | 0.6 | (0.4 to 0.8)  | 34.9  | (7.8 to 85.4)   | 0.4 | (0.1 to 1.0) |
| Gabon                            | Both   | 5 to 9   | 1.8 | (1.3 to 2.3)  | 10.4  | (4.1 to 20.4)   | 0.1 | (0.0 to 0.3) |
| Gabon                            | Both   | 10 to 14 | 3.6 | (2.6 to 4.7)  | 10.2  | (5.0 to 19.3)   | 0.1 | (0.1 to 0.3) |
| Gabon                            | Both   | 15 to 19 | 5.8 | (4.0 to 7.7)  | 28.3  | (13.2 to 50.3)  | 0.4 | (0.2 to 0.7) |
| Burundi                          | Male   | 1 to 4   | 0.9 | (0.5 to 1.3)  | 6.5   | (0.6 to 21.3)   | 0.1 | (0.0 to 0.3) |
| Burundi                          | Male   | 5 to 9   | 2.6 | (1.6 to 3.8)  | 3.7   | (0.7 to 9.5)    | 0   | (0.0 to 0.1) |
| Burundi                          | Male   | 10 to 14 | 4.8 | (2.9 to 7.4)  | 4.1   | (1.1 to 9.6)    | 0   | (0.0 to 0.1) |
| Burundi                          | Male   | 15 to 19 | 7   | (3.8 to 11.5) | 13.3  | (2.3 to 31.3)   | 0.2 | (0.0 to 0.4) |
| Burundi                          | Female | 1 to 4   | 0.6 | (0.3 to 0.8)  | 3.9   | (0.7 to 13.2)   | 0   | (0.0 to 0.2) |
| Burundi                          | Female | 5 to 9   | 1.7 | (1.1 to 2.5)  | 2.5   | (0.7 to 6.8)    | 0   | (0.0 to 0.1) |

|          |        |          |     |               |      |               |     |              |
|----------|--------|----------|-----|---------------|------|---------------|-----|--------------|
| Burundi  | Female | 10 to 14 | 3.1 | (2.0 to 4.5)  | 2.3  | (0.8 to 5.6)  | 0   | (0.0 to 0.1) |
| Burundi  | Female | 15 to 19 | 4.4 | (2.6 to 7.0)  | 7    | (1.9 to 16.2) | 0.1 | (0.0 to 0.2) |
| Burundi  | Both   | 1 to 4   | 0.7 | (0.5 to 1.0)  | 5.2  | (1.0 to 14.2) | 0.1 | (0.0 to 0.2) |
| Burundi  | Both   | 5 to 9   | 2.1 | (1.5 to 2.8)  | 3.1  | (1.0 to 6.5)  | 0   | (0.0 to 0.1) |
| Burundi  | Both   | 10 to 14 | 3.9 | (2.7 to 5.2)  | 3.2  | (1.2 to 6.0)  | 0   | (0.0 to 0.1) |
| Burundi  | Both   | 15 to 19 | 5.7 | (3.6 to 8.1)  | 10.1 | (2.9 to 19.9) | 0.1 | (0.0 to 0.3) |
| Comoros  | Male   | 1 to 4   | 0.8 | (0.5 to 1.3)  | 1.5  | (0.2 to 4.3)  | 0   | (0.0 to 0.0) |
| Comoros  | Male   | 5 to 9   | 2.4 | (1.4 to 3.7)  | 2.6  | (0.7 to 6.9)  | 0   | (0.0 to 0.1) |
| Comoros  | Male   | 10 to 14 | 4.6 | (2.7 to 6.7)  | 4    | (1.3 to 8.5)  | 0   | (0.0 to 0.1) |
| Comoros  | Male   | 15 to 19 | 6.7 | (3.8 to 10.5) | 18.1 | (3.9 to 42.9) | 0.2 | (0.0 to 0.6) |
| Comoros  | Female | 1 to 4   | 0.5 | (0.3 to 0.8)  | 0.6  | (0.1 to 2.6)  | 0   | (0.0 to 0.0) |
| Comoros  | Female | 5 to 9   | 1.6 | (1.0 to 2.3)  | 1.1  | (0.4 to 3.2)  | 0   | (0.0 to 0.0) |
| Comoros  | Female | 10 to 14 | 3   | (1.9 to 4.3)  | 1.8  | (0.7 to 4.7)  | 0   | (0.0 to 0.1) |
| Comoros  | Female | 15 to 19 | 4.5 | (2.6 to 6.8)  | 6.6  | (1.8 to 15.4) | 0.1 | (0.0 to 0.2) |
| Comoros  | Both   | 1 to 4   | 0.7 | (0.5 to 1.0)  | 1.1  | (0.2 to 2.9)  | 0   | (0.0 to 0.0) |
| Comoros  | Both   | 5 to 9   | 2   | (1.4 to 2.7)  | 1.9  | (0.6 to 4.4)  | 0   | (0.0 to 0.1) |
| Comoros  | Both   | 10 to 14 | 3.8 | (2.6 to 5.0)  | 2.9  | (1.2 to 5.7)  | 0   | (0.0 to 0.1) |
| Comoros  | Both   | 15 to 19 | 5.6 | (3.6 to 7.7)  | 12.4 | (3.6 to 26.6) | 0.2 | (0.0 to 0.4) |
| Djibouti | Male   | 1 to 4   | 0.8 | (0.5 to 1.2)  | 5.3  | (1.0 to 17.7) | 0.1 | (0.0 to 0.2) |
| Djibouti | Male   | 5 to 9   | 2.3 | (1.4 to 3.5)  | 4.5  | (1.8 to 10.3) | 0.1 | (0.0 to 0.1) |
| Djibouti | Male   | 10 to 14 | 4.3 | (2.8 to 6.2)  | 4.9  | (2.4 to 9.5)  | 0.1 | (0.0 to 0.1) |
| Djibouti | Male   | 15 to 19 | 6.2 | (3.6 to 9.3)  | 18.8 | (7.6 to 41.0) | 0.3 | (0.1 to 0.6) |
| Djibouti | Female | 1 to 4   | 0.6 | (0.3 to 0.8)  | 3.5  | (0.7 to 10.1) | 0   | (0.0 to 0.1) |
| Djibouti | Female | 5 to 9   | 1.7 | (1.1 to 2.3)  | 3.4  | (1.2 to 8.3)  | 0   | (0.0 to 0.1) |
| Djibouti | Female | 10 to 14 | 3.1 | (1.9 to 4.6)  | 3.3  | (1.3 to 7.6)  | 0   | (0.0 to 0.1) |
| Djibouti | Female | 15 to 19 | 4.4 | (2.4 to 7.2)  | 12.1 | (4.7 to 28.4) | 0.2 | (0.1 to 0.4) |
| Djibouti | Both   | 1 to 4   | 0.7 | (0.4 to 0.9)  | 4.4  | (1.4 to 11.4) | 0.1 | (0.0 to 0.1) |
| Djibouti | Both   | 5 to 9   | 2   | (1.5 to 2.7)  | 3.9  | (1.9 to 7.8)  | 0   | (0.0 to 0.1) |
| Djibouti | Both   | 10 to 14 | 3.7 | (2.6 to 5.0)  | 4.1  | (2.2 to 7.2)  | 0   | (0.0 to 0.1) |
| Djibouti | Both   | 15 to 19 | 5.3 | (3.6 to 7.3)  | 15.5 | (7.6 to 29.0) | 0.2 | (0.1 to 0.4) |
| Eritrea  | Male   | 1 to 4   | 0.8 | (0.5 to 1.2)  | 3.5  | (0.7 to 10.0) | 0   | (0.0 to 0.1) |
| Eritrea  | Male   | 5 to 9   | 2.4 | (1.3 to 3.5)  | 2.1  | (0.8 to 4.9)  | 0   | (0.0 to 0.1) |
| Eritrea  | Male   | 10 to 14 | 4.5 | (2.8 to 6.3)  | 3    | (1.3 to 5.8)  | 0   | (0.0 to 0.1) |

|          |        |          |     |               |      |               |     |              |
|----------|--------|----------|-----|---------------|------|---------------|-----|--------------|
| Eritrea  | Male   | 15 to 19 | 6.6 | (3.8 to 9.6)  | 12.7 | (4.1 to 31.2) | 0.2 | (0.0 to 0.4) |
| Eritrea  | Female | 1 to 4   | 0.5 | (0.3 to 0.8)  | 2.7  | (0.4 to 9.1)  | 0   | (0.0 to 0.1) |
| Eritrea  | Female | 5 to 9   | 1.6 | (1.0 to 2.4)  | 2    | (0.6 to 6.5)  | 0   | (0.0 to 0.1) |
| Eritrea  | Female | 10 to 14 | 3   | (1.9 to 4.4)  | 2.6  | (1.0 to 6.9)  | 0   | (0.0 to 0.1) |
| Eritrea  | Female | 15 to 19 | 4.3 | (2.5 to 6.7)  | 8.1  | (2.4 to 24.3) | 0.1 | (0.0 to 0.3) |
| Eritrea  | Both   | 1 to 4   | 0.7 | (0.5 to 0.9)  | 3.1  | (0.8 to 7.6)  | 0   | (0.0 to 0.1) |
| Eritrea  | Both   | 5 to 9   | 2   | (1.4 to 2.6)  | 2    | (0.8 to 5.1)  | 0   | (0.0 to 0.1) |
| Eritrea  | Both   | 10 to 14 | 3.7 | (2.7 to 4.8)  | 2.8  | (1.4 to 5.7)  | 0   | (0.0 to 0.1) |
| Eritrea  | Both   | 15 to 19 | 5.4 | (3.9 to 7.2)  | 10.5 | (4.5 to 25.2) | 0.1 | (0.1 to 0.4) |
| Ethiopia | Male   | 1 to 4   | 0.8 | (0.4 to 1.2)  | 2    | (0.5 to 5.4)  | 0   | (0.0 to 0.1) |
| Ethiopia | Male   | 5 to 9   | 1.8 | (1.1 to 2.9)  | 2    | (0.6 to 4.4)  | 0   | (0.0 to 0.1) |
| Ethiopia | Male   | 10 to 14 | 2.8 | (1.9 to 3.9)  | 2.1  | (0.8 to 4.4)  | 0   | (0.0 to 0.1) |
| Ethiopia | Male   | 15 to 19 | 3.4 | (2.2 to 4.8)  | 9.4  | (2.0 to 24.1) | 0.1 | (0.0 to 0.3) |
| Ethiopia | Female | 1 to 4   | 0.4 | (0.3 to 0.6)  | 1.5  | (0.3 to 4.2)  | 0   | (0.0 to 0.0) |
| Ethiopia | Female | 5 to 9   | 1.1 | (0.8 to 1.5)  | 1.2  | (0.4 to 3.2)  | 0   | (0.0 to 0.0) |
| Ethiopia | Female | 10 to 14 | 1.8 | (1.3 to 2.4)  | 1.2  | (0.4 to 2.7)  | 0   | (0.0 to 0.0) |
| Ethiopia | Female | 15 to 19 | 2.3 | (1.6 to 3.3)  | 3.5  | (1.0 to 7.8)  | 0   | (0.0 to 0.1) |
| Ethiopia | Both   | 1 to 4   | 0.6 | (0.4 to 0.9)  | 1.7  | (0.5 to 4.1)  | 0   | (0.0 to 0.0) |
| Ethiopia | Both   | 5 to 9   | 1.5 | (1.1 to 2.1)  | 1.6  | (0.6 to 3.2)  | 0   | (0.0 to 0.0) |
| Ethiopia | Both   | 10 to 14 | 2.3 | (1.8 to 3.0)  | 1.7  | (0.7 to 3.0)  | 0   | (0.0 to 0.0) |
| Ethiopia | Both   | 15 to 19 | 2.9 | (2.2 to 3.7)  | 6.5  | (2.0 to 14.3) | 0.1 | (0.0 to 0.2) |
| Kenya    | Male   | 1 to 4   | 0.8 | (0.5 to 1.2)  | 2.1  | (0.6 to 5.4)  | 0   | (0.0 to 0.1) |
| Kenya    | Male   | 5 to 9   | 2.4 | (1.5 to 3.4)  | 2    | (0.9 to 4.2)  | 0   | (0.0 to 0.0) |
| Kenya    | Male   | 10 to 14 | 4.5 | (2.7 to 6.5)  | 2.2  | (1.1 to 3.9)  | 0   | (0.0 to 0.0) |
| Kenya    | Male   | 15 to 19 | 6.6 | (3.7 to 10.2) | 7.8  | (2.7 to 16.4) | 0.1 | (0.0 to 0.2) |
| Kenya    | Female | 1 to 4   | 0.5 | (0.3 to 0.8)  | 1.5  | (0.5 to 3.7)  | 0   | (0.0 to 0.0) |
| Kenya    | Female | 5 to 9   | 1.6 | (1.1 to 2.2)  | 1.1  | (0.5 to 2.4)  | 0   | (0.0 to 0.0) |
| Kenya    | Female | 10 to 14 | 2.8 | (1.9 to 4.0)  | 1    | (0.5 to 1.8)  | 0   | (0.0 to 0.0) |
| Kenya    | Female | 15 to 19 | 4   | (2.3 to 5.9)  | 3.5  | (1.5 to 7.0)  | 0   | (0.0 to 0.1) |
| Kenya    | Both   | 1 to 4   | 0.7 | (0.5 to 0.9)  | 1.8  | (0.7 to 3.8)  | 0   | (0.0 to 0.0) |
| Kenya    | Both   | 5 to 9   | 2   | (1.4 to 2.6)  | 1.6  | (0.8 to 2.9)  | 0   | (0.0 to 0.0) |
| Kenya    | Both   | 10 to 14 | 3.7 | (2.5 to 4.8)  | 1.6  | (0.9 to 2.6)  | 0   | (0.0 to 0.0) |
| Kenya    | Both   | 15 to 19 | 5.3 | (3.4 to 7.2)  | 5.6  | (2.6 to 10.6) | 0.1 | (0.0 to 0.1) |

|            |        |          |     |               |      |                 |     |              |
|------------|--------|----------|-----|---------------|------|-----------------|-----|--------------|
| Madagascar | Male   | 1 to 4   | 0.9 | (0.6 to 1.3)  | 7.4  | (1.6 to 20.2)   | 0.1 | (0.0 to 0.2) |
| Madagascar | Male   | 5 to 9   | 2.6 | (1.7 to 3.7)  | 5.8  | (1.8 to 12.4)   | 0.1 | (0.0 to 0.1) |
| Madagascar | Male   | 10 to 14 | 4.8 | (3.1 to 7.0)  | 10.4 | (4.0 to 22.0)   | 0.1 | (0.0 to 0.3) |
| Madagascar | Male   | 15 to 19 | 7   | (4.1 to 10.8) | 73.7 | (20.8 to 158.8) | 1   | (0.3 to 2.3) |
| Madagascar | Female | 1 to 4   | 0.6 | (0.4 to 0.9)  | 4.2  | (0.9 to 12.7)   | 0   | (0.0 to 0.1) |
| Madagascar | Female | 5 to 9   | 1.7 | (1.1 to 2.5)  | 3.8  | (1.1 to 10.4)   | 0   | (0.0 to 0.1) |
| Madagascar | Female | 10 to 14 | 3.2 | (2.0 to 4.5)  | 6    | (2.1 to 14.2)   | 0.1 | (0.0 to 0.2) |
| Madagascar | Female | 15 to 19 | 4.7 | (2.8 to 6.9)  | 28.4 | (10.7 to 62.2)  | 0.4 | (0.1 to 0.9) |
| Madagascar | Both   | 1 to 4   | 0.7 | (0.5 to 1.0)  | 5.8  | (1.8 to 13.5)   | 0.1 | (0.0 to 0.2) |
| Madagascar | Both   | 5 to 9   | 2.1 | (1.6 to 2.8)  | 4.8  | (1.8 to 9.8)    | 0.1 | (0.0 to 0.1) |
| Madagascar | Both   | 10 to 14 | 4   | (3.0 to 5.1)  | 8.2  | (3.6 to 16.1)   | 0.1 | (0.0 to 0.2) |
| Madagascar | Both   | 15 to 19 | 5.8 | (4.0 to 7.9)  | 51   | (19.8 to 95.9)  | 0.7 | (0.3 to 1.4) |
| Malawi     | Male   | 1 to 4   | 0.8 | (0.5 to 1.2)  | 8.2  | (0.8 to 25.0)   | 0.1 | (0.0 to 0.3) |
| Malawi     | Male   | 5 to 9   | 2.4 | (1.5 to 3.5)  | 3    | (0.9 to 7.1)    | 0   | (0.0 to 0.1) |
| Malawi     | Male   | 10 to 14 | 4.4 | (2.8 to 6.9)  | 2.4  | (1.1 to 4.6)    | 0   | (0.0 to 0.1) |
| Malawi     | Male   | 15 to 19 | 6.4 | (3.7 to 10.6) | 7    | (1.9 to 15.8)   | 0.1 | (0.0 to 0.2) |
| Malawi     | Female | 1 to 4   | 0.6 | (0.3 to 0.8)  | 3.7  | (0.8 to 11.3)   | 0   | (0.0 to 0.1) |
| Malawi     | Female | 5 to 9   | 1.7 | (1.1 to 2.5)  | 1.6  | (0.6 to 3.9)    | 0   | (0.0 to 0.0) |
| Malawi     | Female | 10 to 14 | 3.1 | (1.8 to 4.5)  | 1.1  | (0.6 to 2.1)    | 0   | (0.0 to 0.0) |
| Malawi     | Female | 15 to 19 | 4.3 | (2.4 to 6.8)  | 4.2  | (1.6 to 8.6)    | 0   | (0.0 to 0.1) |
| Malawi     | Both   | 1 to 4   | 0.7 | (0.5 to 0.9)  | 6    | (1.2 to 15.0)   | 0.1 | (0.0 to 0.2) |
| Malawi     | Both   | 5 to 9   | 2   | (1.5 to 2.7)  | 2.3  | (0.9 to 4.9)    | 0   | (0.0 to 0.1) |
| Malawi     | Both   | 10 to 14 | 3.8 | (2.7 to 5.0)  | 1.8  | (0.9 to 3.2)    | 0   | (0.0 to 0.0) |
| Malawi     | Both   | 15 to 19 | 5.4 | (3.7 to 7.7)  | 5.6  | (2.0 to 11.1)   | 0.1 | (0.0 to 0.1) |
| Mauritius  | Male   | 1 to 4   | 0.4 | (0.2 to 0.6)  | 12.2 | (4.9 to 23.0)   | 0.1 | (0.1 to 0.3) |
| Mauritius  | Male   | 5 to 9   | 1   | (0.5 to 1.8)  | 4.7  | (2.2 to 7.8)    | 0.1 | (0.0 to 0.1) |
| Mauritius  | Male   | 10 to 14 | 2.2 | (1.2 to 3.4)  | 3.4  | (1.7 to 5.7)    | 0   | (0.0 to 0.1) |
| Mauritius  | Male   | 15 to 19 | 3.9 | (2.1 to 6.0)  | 30.2 | (16.1 to 51.9)  | 0.4 | (0.2 to 0.7) |
| Mauritius  | Female | 1 to 4   | 0.2 | (0.1 to 0.4)  | 3.1  | (1.1 to 5.6)    | 0   | (0.0 to 0.1) |
| Mauritius  | Female | 5 to 9   | 0.7 | (0.4 to 1.2)  | 5    | (2.5 to 11.0)   | 0.1 | (0.0 to 0.1) |
| Mauritius  | Female | 10 to 14 | 1.7 | (1.1 to 2.6)  | 2.5  | (1.1 to 4.0)    | 0   | (0.0 to 0.0) |
| Mauritius  | Female | 15 to 19 | 3.1 | (2.0 to 4.6)  | 15   | (8.4 to 23.5)   | 0.2 | (0.1 to 0.3) |
| Mauritius  | Both   | 1 to 4   | 0.3 | (0.2 to 0.4)  | 7.8  | (3.7 to 13.5)   | 0.1 | (0.0 to 0.2) |



|            |        |          |     |               |      |                 |     |              |
|------------|--------|----------|-----|---------------|------|-----------------|-----|--------------|
| Mauritius  | Both   | 5 to 9   | 0.9 | (0.5 to 1.3)  | 4.8  | (2.8 to 7.8)    | 0.1 | (0.0 to 0.1) |
| Mauritius  | Both   | 10 to 14 | 2   | (1.3 to 2.7)  | 2.9  | (1.7 to 4.5)    | 0   | (0.0 to 0.1) |
| Mauritius  | Both   | 15 to 19 | 3.5 | (2.3 to 4.8)  | 22.7 | (14.7 to 33.9)  | 0.3 | (0.2 to 0.5) |
| Mozambique | Male   | 1 to 4   | 0.8 | (0.4 to 1.2)  | 1.8  | (0.4 to 5.1)    | 0   | (0.0 to 0.1) |
| Mozambique | Male   | 5 to 9   | 2.3 | (1.2 to 3.4)  | 1.9  | (0.7 to 4.8)    | 0   | (0.0 to 0.1) |
| Mozambique | Male   | 10 to 14 | 4.3 | (2.5 to 6.7)  | 2.3  | (1.1 to 4.8)    | 0   | (0.0 to 0.1) |
| Mozambique | Male   | 15 to 19 | 6.4 | (3.5 to 11.0) | 10.4 | (4.2 to 20.8)   | 0.1 | (0.0 to 0.3) |
| Mozambique | Female | 1 to 4   | 0.5 | (0.3 to 0.8)  | 1.6  | (0.4 to 4.1)    | 0   | (0.0 to 0.0) |
| Mozambique | Female | 5 to 9   | 1.6 | (1.1 to 2.3)  | 1.4  | (0.6 to 3.3)    | 0   | (0.0 to 0.0) |
| Mozambique | Female | 10 to 14 | 3   | (2.0 to 4.2)  | 1.2  | (0.6 to 2.4)    | 0   | (0.0 to 0.0) |
| Mozambique | Female | 15 to 19 | 4.3 | (2.5 to 6.6)  | 4.4  | (2.0 to 8.7)    | 0.1 | (0.0 to 0.1) |
| Mozambique | Both   | 1 to 4   | 0.7 | (0.5 to 0.9)  | 1.7  | (0.6 to 4.0)    | 0   | (0.0 to 0.0) |
| Mozambique | Both   | 5 to 9   | 1.9 | (1.4 to 2.6)  | 1.6  | (0.8 to 3.7)    | 0   | (0.0 to 0.0) |
| Mozambique | Both   | 10 to 14 | 3.7 | (2.6 to 5.0)  | 1.8  | (1.0 to 3.3)    | 0   | (0.0 to 0.0) |
| Mozambique | Both   | 15 to 19 | 5.4 | (3.6 to 7.9)  | 7.4  | (3.7 to 13.1)   | 0.1 | (0.0 to 0.2) |
| Rwanda     | Male   | 1 to 4   | 0.8 | (0.5 to 1.3)  | 3.7  | (0.5 to 10.9)   | 0   | (0.0 to 0.1) |
| Rwanda     | Male   | 5 to 9   | 2.3 | (1.5 to 3.3)  | 2.6  | (0.6 to 6.4)    | 0   | (0.0 to 0.1) |
| Rwanda     | Male   | 10 to 14 | 4.3 | (2.8 to 6.3)  | 2.8  | (0.9 to 6.0)    | 0   | (0.0 to 0.1) |
| Rwanda     | Male   | 15 to 19 | 6.2 | (3.5 to 9.7)  | 9.9  | (2.0 to 23.9)   | 0.1 | (0.0 to 0.3) |
| Rwanda     | Female | 1 to 4   | 0.5 | (0.3 to 0.8)  | 2    | (0.4 to 6.7)    | 0   | (0.0 to 0.1) |
| Rwanda     | Female | 5 to 9   | 1.6 | (1.1 to 2.3)  | 1.5  | (0.5 to 4.4)    | 0   | (0.0 to 0.1) |
| Rwanda     | Female | 10 to 14 | 2.9 | (1.9 to 4.3)  | 1.4  | (0.6 to 3.1)    | 0   | (0.0 to 0.0) |
| Rwanda     | Female | 15 to 19 | 4.2 | (2.4 to 6.5)  | 4.4  | (1.2 to 11.4)   | 0.1 | (0.0 to 0.2) |
| Rwanda     | Both   | 1 to 4   | 0.7 | (0.5 to 0.9)  | 2.9  | (0.7 to 7.1)    | 0   | (0.0 to 0.1) |
| Rwanda     | Both   | 5 to 9   | 2   | (1.4 to 2.6)  | 2    | (0.7 to 4.4)    | 0   | (0.0 to 0.1) |
| Rwanda     | Both   | 10 to 14 | 3.6 | (2.7 to 4.6)  | 2.1  | (0.9 to 3.8)    | 0   | (0.0 to 0.0) |
| Rwanda     | Both   | 15 to 19 | 5.2 | (3.5 to 7.1)  | 7.1  | (2.2 to 14.6)   | 0.1 | (0.0 to 0.2) |
| Seychelles | Male   | 1 to 4   | 0.4 | (0.2 to 0.6)  | 22.2 | (7.4 to 43.8)   | 0.3 | (0.1 to 0.5) |
| Seychelles | Male   | 5 to 9   | 1.1 | (0.5 to 1.9)  | 5.6  | (1.9 to 10.9)   | 0.1 | (0.0 to 0.1) |
| Seychelles | Male   | 10 to 14 | 2.3 | (1.3 to 3.6)  | 6.3  | (3.1 to 11.0)   | 0.1 | (0.0 to 0.1) |
| Seychelles | Male   | 15 to 19 | 3.9 | (2.4 to 5.9)  | 51.7 | (17.4 to 118.4) | 0.7 | (0.2 to 1.7) |
| Seychelles | Female | 1 to 4   | 0.3 | (0.1 to 0.4)  | 15   | (5.1 to 30.3)   | 0.2 | (0.1 to 0.4) |
| Seychelles | Female | 5 to 9   | 0.8 | (0.5 to 1.4)  | 4.8  | (0.7 to 11.2)   | 0.1 | (0.0 to 0.1) |

|            |        |          |     |               |       |                 |     |              |
|------------|--------|----------|-----|---------------|-------|-----------------|-----|--------------|
| Seychelles | Female | 10 to 14 | 1.8 | (1.1 to 2.8)  | 7.2   | (1.6 to 15.1)   | 0.1 | (0.0 to 0.2) |
| Seychelles | Female | 15 to 19 | 3.1 | (1.8 to 4.9)  | 104.3 | (49.9 to 230.1) | 1.5 | (0.7 to 3.3) |
| Seychelles | Both   | 1 to 4   | 0.3 | (0.2 to 0.4)  | 18.7  | (7.7 to 34.0)   | 0.2 | (0.1 to 0.4) |
| Seychelles | Both   | 5 to 9   | 1   | (0.6 to 1.4)  | 5.2   | (1.5 to 9.6)    | 0.1 | (0.0 to 0.1) |
| Seychelles | Both   | 10 to 14 | 2   | (1.4 to 2.8)  | 6.7   | (3.1 to 11.4)   | 0.1 | (0.0 to 0.1) |
| Seychelles | Both   | 15 to 19 | 3.5 | (2.4 to 4.7)  | 76.9  | (40.1 to 128.2) | 1.1 | (0.6 to 1.8) |
| Somalia    | Male   | 1 to 4   | 0.8 | (0.4 to 1.3)  | 7.7   | (1.1 to 23.2)   | 0.1 | (0.0 to 0.3) |
| Somalia    | Male   | 5 to 9   | 2.4 | (1.4 to 3.4)  | 4.3   | (1.2 to 10.1)   | 0   | (0.0 to 0.1) |
| Somalia    | Male   | 10 to 14 | 4.4 | (2.9 to 6.4)  | 4.7   | (1.6 to 10.4)   | 0.1 | (0.0 to 0.1) |
| Somalia    | Male   | 15 to 19 | 6.4 | (3.9 to 10.3) | 14.8  | (3.5 to 35.5)   | 0.2 | (0.0 to 0.5) |
| Somalia    | Female | 1 to 4   | 0.6 | (0.4 to 0.9)  | 4.3   | (0.8 to 13.7)   | 0   | (0.0 to 0.2) |
| Somalia    | Female | 5 to 9   | 1.7 | (1.1 to 2.4)  | 2.8   | (0.9 to 6.9)    | 0   | (0.0 to 0.1) |
| Somalia    | Female | 10 to 14 | 3.1 | (2.0 to 4.3)  | 2.8   | (1.0 to 6.6)    | 0   | (0.0 to 0.1) |
| Somalia    | Female | 15 to 19 | 4.3 | (2.5 to 6.4)  | 7.9   | (2.3 to 18.1)   | 0.1 | (0.0 to 0.3) |
| Somalia    | Both   | 1 to 4   | 0.7 | (0.5 to 1.0)  | 6     | (1.2 to 14.2)   | 0.1 | (0.0 to 0.2) |
| Somalia    | Both   | 5 to 9   | 2   | (1.5 to 2.7)  | 3.6   | (1.3 to 7.4)    | 0   | (0.0 to 0.1) |
| Somalia    | Both   | 10 to 14 | 3.7 | (2.8 to 4.9)  | 3.8   | (1.6 to 7.1)    | 0   | (0.0 to 0.1) |
| Somalia    | Both   | 15 to 19 | 5.4 | (3.7 to 7.3)  | 11.4  | (3.8 to 23.1)   | 0.2 | (0.0 to 0.3) |
| Tanzania   | Male   | 1 to 4   | 0.9 | (0.5 to 1.3)  | 3.3   | (0.6 to 8.9)    | 0   | (0.0 to 0.1) |
| Tanzania   | Male   | 5 to 9   | 2.5 | (1.4 to 3.9)  | 2.5   | (0.9 to 5.3)    | 0   | (0.0 to 0.1) |
| Tanzania   | Male   | 10 to 14 | 4.7 | (3.0 to 7.0)  | 2.4   | (1.1 to 4.6)    | 0   | (0.0 to 0.1) |
| Tanzania   | Male   | 15 to 19 | 6.9 | (4.0 to 11.5) | 7.3   | (2.2 to 14.9)   | 0.1 | (0.0 to 0.2) |
| Tanzania   | Female | 1 to 4   | 0.5 | (0.3 to 0.8)  | 2.1   | (0.5 to 6.0)    | 0   | (0.0 to 0.1) |
| Tanzania   | Female | 5 to 9   | 1.6 | (1.0 to 2.4)  | 1.4   | (0.6 to 3.0)    | 0   | (0.0 to 0.0) |
| Tanzania   | Female | 10 to 14 | 3   | (1.9 to 4.6)  | 1.3   | (0.6 to 2.5)    | 0   | (0.0 to 0.0) |
| Tanzania   | Female | 15 to 19 | 4.5 | (2.6 to 7.2)  | 4.9   | (2.0 to 9.6)    | 0.1 | (0.0 to 0.1) |
| Tanzania   | Both   | 1 to 4   | 0.7 | (0.5 to 1.0)  | 2.7   | (0.9 to 5.8)    | 0   | (0.0 to 0.1) |
| Tanzania   | Both   | 5 to 9   | 2.1 | (1.4 to 2.8)  | 1.9   | (0.8 to 3.7)    | 0   | (0.0 to 0.0) |
| Tanzania   | Both   | 10 to 14 | 3.9 | (2.7 to 5.4)  | 1.9   | (1.0 to 3.2)    | 0   | (0.0 to 0.0) |
| Tanzania   | Both   | 15 to 19 | 5.7 | (3.8 to 8.3)  | 6.1   | (2.6 to 11.0)   | 0.1 | (0.0 to 0.1) |
| Uganda     | Male   | 1 to 4   | 0.8 | (0.5 to 1.2)  | 4.1   | (0.5 to 14.0)   | 0   | (0.0 to 0.2) |
| Uganda     | Male   | 5 to 9   | 2.3 | (1.4 to 3.6)  | 2.2   | (0.7 to 5.3)    | 0   | (0.0 to 0.1) |
| Uganda     | Male   | 10 to 14 | 4.2 | (2.5 to 6.5)  | 2.5   | (1.1 to 5.7)    | 0   | (0.0 to 0.1) |

|          |        |          |     |               |     |               |     |              |
|----------|--------|----------|-----|---------------|-----|---------------|-----|--------------|
| Uganda   | Male   | 15 to 19 | 6.2 | (3.4 to 9.9)  | 8   | (2.4 to 18.4) | 0.1 | (0.0 to 0.3) |
| Uganda   | Female | 1 to 4   | 0.6 | (0.4 to 0.8)  | 2.8 | (0.6 to 8.1)  | 0   | (0.0 to 0.1) |
| Uganda   | Female | 5 to 9   | 1.7 | (1.1 to 2.4)  | 1.8 | (0.5 to 4.5)  | 0   | (0.0 to 0.1) |
| Uganda   | Female | 10 to 14 | 3   | (1.9 to 4.4)  | 1.7 | (0.6 to 3.7)  | 0   | (0.0 to 0.0) |
| Uganda   | Female | 15 to 19 | 4.3 | (2.5 to 6.6)  | 6   | (1.4 to 12.5) | 0.1 | (0.0 to 0.2) |
| Uganda   | Both   | 1 to 4   | 0.7 | (0.5 to 1.0)  | 3.5 | (0.8 to 8.9)  | 0   | (0.0 to 0.1) |
| Uganda   | Both   | 5 to 9   | 2   | (1.5 to 2.7)  | 2   | (0.7 to 4.0)  | 0   | (0.0 to 0.0) |
| Uganda   | Both   | 10 to 14 | 3.6 | (2.6 to 4.9)  | 2.1 | (1.0 to 4.1)  | 0   | (0.0 to 0.0) |
| Uganda   | Both   | 15 to 19 | 5.2 | (3.6 to 7.4)  | 7   | (2.5 to 13.5) | 0.1 | (0.0 to 0.2) |
| Zambia   | Male   | 1 to 4   | 0.8 | (0.4 to 1.2)  | 4   | (0.6 to 12.2) | 0   | (0.0 to 0.1) |
| Zambia   | Male   | 5 to 9   | 2.3 | (1.4 to 3.4)  | 2   | (0.8 to 4.3)  | 0   | (0.0 to 0.0) |
| Zambia   | Male   | 10 to 14 | 4.3 | (2.7 to 6.6)  | 2   | (1.1 to 3.8)  | 0   | (0.0 to 0.0) |
| Zambia   | Male   | 15 to 19 | 6.3 | (3.7 to 10.4) | 8.1 | (3.4 to 17.0) | 0.1 | (0.0 to 0.2) |
| Zambia   | Female | 1 to 4   | 0.6 | (0.4 to 0.8)  | 2.6 | (0.6 to 6.6)  | 0   | (0.0 to 0.1) |
| Zambia   | Female | 5 to 9   | 1.7 | (1.1 to 2.4)  | 1.1 | (0.5 to 2.3)  | 0   | (0.0 to 0.0) |
| Zambia   | Female | 10 to 14 | 3.1 | (1.9 to 4.6)  | 1.3 | (0.7 to 2.5)  | 0   | (0.0 to 0.0) |
| Zambia   | Female | 15 to 19 | 4.5 | (2.5 to 7.0)  | 6.3 | (2.7 to 11.9) | 0.1 | (0.0 to 0.2) |
| Zambia   | Both   | 1 to 4   | 0.7 | (0.5 to 0.9)  | 3.3 | (0.9 to 7.6)  | 0   | (0.0 to 0.1) |
| Zambia   | Both   | 5 to 9   | 2   | (1.4 to 2.6)  | 1.6 | (0.8 to 2.9)  | 0   | (0.0 to 0.0) |
| Zambia   | Both   | 10 to 14 | 3.7 | (2.7 to 4.9)  | 1.7 | (1.0 to 2.7)  | 0   | (0.0 to 0.0) |
| Zambia   | Both   | 15 to 19 | 5.4 | (3.7 to 7.4)  | 7.2 | (3.7 to 12.7) | 0.1 | (0.0 to 0.2) |
| Botswana | Male   | 1 to 4   | 0.6 | (0.3 to 0.9)  | 3   | (0.5 to 9.9)  | 0   | (0.0 to 0.1) |
| Botswana | Male   | 5 to 9   | 1.8 | (1.0 to 2.6)  | 2.3 | (0.8 to 6.5)  | 0   | (0.0 to 0.1) |
| Botswana | Male   | 10 to 14 | 3.8 | (2.3 to 5.3)  | 3.3 | (1.4 to 6.9)  | 0   | (0.0 to 0.1) |
| Botswana | Male   | 15 to 19 | 6.4 | (3.9 to 9.0)  | 9.7 | (3.7 to 20.0) | 0.1 | (0.0 to 0.3) |
| Botswana | Female | 1 to 4   | 0.5 | (0.3 to 0.7)  | 3.2 | (0.6 to 12.7) | 0   | (0.0 to 0.1) |
| Botswana | Female | 5 to 9   | 1.7 | (1.0 to 2.4)  | 3.8 | (1.0 to 15.2) | 0   | (0.0 to 0.2) |
| Botswana | Female | 10 to 14 | 3.5 | (2.3 to 4.8)  | 1.9 | (0.6 to 9.9)  | 0   | (0.0 to 0.1) |
| Botswana | Female | 15 to 19 | 5.8 | (3.8 to 8.2)  | 5   | (1.8 to 15.7) | 0.1 | (0.0 to 0.2) |
| Botswana | Both   | 1 to 4   | 0.5 | (0.4 to 0.7)  | 3.1 | (0.9 to 10.5) | 0   | (0.0 to 0.1) |
| Botswana | Both   | 5 to 9   | 1.7 | (1.2 to 2.2)  | 3.1 | (1.2 to 10.2) | 0   | (0.0 to 0.1) |
| Botswana | Both   | 10 to 14 | 3.7 | (2.7 to 4.7)  | 2.6 | (1.2 to 7.1)  | 0   | (0.0 to 0.1) |
| Botswana | Both   | 15 to 19 | 6.1 | (4.4 to 7.9)  | 7.4 | (3.7 to 16.1) | 0.1 | (0.0 to 0.2) |

|              |        |          |     |              |      |               |     |              |
|--------------|--------|----------|-----|--------------|------|---------------|-----|--------------|
| Lesotho      | Male   | 1 to 4   | 0.5 | (0.3 to 0.8) | 8.2  | (1.7 to 22.4) | 0.1 | (0.0 to 0.3) |
| Lesotho      | Male   | 5 to 9   | 1.7 | (1.0 to 2.5) | 5.1  | (1.6 to 12.4) | 0.1 | (0.0 to 0.2) |
| Lesotho      | Male   | 10 to 14 | 3.6 | (2.2 to 5.1) | 4.3  | (1.7 to 9.8)  | 0   | (0.0 to 0.1) |
| Lesotho      | Male   | 15 to 19 | 6.2 | (3.6 to 8.8) | 16.2 | (6.5 to 34.2) | 0.2 | (0.1 to 0.5) |
| Lesotho      | Female | 1 to 4   | 0.5 | (0.3 to 0.7) | 9.2  | (2.2 to 26.4) | 0.1 | (0.0 to 0.3) |
| Lesotho      | Female | 5 to 9   | 1.6 | (1.0 to 2.3) | 7.2  | (2.2 to 18.6) | 0.1 | (0.0 to 0.2) |
| Lesotho      | Female | 10 to 14 | 3.3 | (2.2 to 4.8) | 3.3  | (1.3 to 8.6)  | 0   | (0.0 to 0.1) |
| Lesotho      | Female | 15 to 19 | 5.6 | (3.4 to 8.2) | 12.7 | (4.5 to 32.9) | 0.2 | (0.1 to 0.5) |
| Lesotho      | Both   | 1 to 4   | 0.5 | (0.3 to 0.7) | 8.7  | (3.0 to 20.4) | 0.1 | (0.0 to 0.2) |
| Lesotho      | Both   | 5 to 9   | 1.6 | (1.2 to 2.2) | 6.1  | (2.7 to 12.9) | 0.1 | (0.0 to 0.2) |
| Lesotho      | Both   | 10 to 14 | 3.5 | (2.5 to 4.6) | 3.8  | (2.0 to 7.2)  | 0   | (0.0 to 0.1) |
| Lesotho      | Both   | 15 to 19 | 5.9 | (4.0 to 7.9) | 14.5 | (7.2 to 26.1) | 0.2 | (0.1 to 0.4) |
| Namibia      | Male   | 1 to 4   | 0.5 | (0.3 to 0.9) | 3.9  | (0.8 to 11.1) | 0   | (0.0 to 0.1) |
| Namibia      | Male   | 5 to 9   | 1.7 | (1.0 to 2.5) | 3.1  | (1.0 to 7.1)  | 0   | (0.0 to 0.1) |
| Namibia      | Male   | 10 to 14 | 3.7 | (2.4 to 5.2) | 3.6  | (1.7 to 6.8)  | 0   | (0.0 to 0.1) |
| Namibia      | Male   | 15 to 19 | 6.2 | (4.0 to 8.8) | 14.3 | (6.3 to 27.9) | 0.2 | (0.1 to 0.4) |
| Namibia      | Female | 1 to 4   | 0.5 | (0.3 to 0.7) | 3.5  | (0.7 to 11.5) | 0   | (0.0 to 0.1) |
| Namibia      | Female | 5 to 9   | 1.6 | (0.9 to 2.3) | 3.3  | (0.9 to 11.5) | 0   | (0.0 to 0.1) |
| Namibia      | Female | 10 to 14 | 3.3 | (2.1 to 4.7) | 2.8  | (1.0 to 7.5)  | 0   | (0.0 to 0.1) |
| Namibia      | Female | 15 to 19 | 5.6 | (3.5 to 8.0) | 7.1  | (2.9 to 15.0) | 0.1 | (0.0 to 0.2) |
| Namibia      | Both   | 1 to 4   | 0.5 | (0.3 to 0.7) | 3.7  | (1.0 to 9.9)  | 0   | (0.0 to 0.1) |
| Namibia      | Both   | 5 to 9   | 1.6 | (1.2 to 2.1) | 3.2  | (1.3 to 8.8)  | 0   | (0.0 to 0.1) |
| Namibia      | Both   | 10 to 14 | 3.5 | (2.6 to 4.5) | 3.2  | (1.6 to 6.6)  | 0   | (0.0 to 0.1) |
| Namibia      | Both   | 15 to 19 | 5.9 | (4.3 to 7.6) | 10.7 | (5.6 to 18.3) | 0.1 | (0.1 to 0.2) |
| South Africa | Male   | 1 to 4   | 0.5 | (0.3 to 0.8) | 3.4  | (0.7 to 10.5) | 0   | (0.0 to 0.1) |
| South Africa | Male   | 5 to 9   | 1.7 | (1.0 to 2.5) | 1.7  | (0.7 to 4.2)  | 0   | (0.0 to 0.0) |
| South Africa | Male   | 10 to 14 | 3.5 | (2.2 to 5.1) | 2.1  | (1.1 to 3.7)  | 0   | (0.0 to 0.0) |
| South Africa | Male   | 15 to 19 | 5.8 | (3.5 to 8.4) | 13   | (6.9 to 21.8) | 0.2 | (0.1 to 0.3) |
| South Africa | Female | 1 to 4   | 0.5 | (0.3 to 0.7) | 3.2  | (0.8 to 11.9) | 0   | (0.0 to 0.1) |
| South Africa | Female | 5 to 9   | 1.6 | (1.1 to 2.4) | 2.3  | (0.8 to 6.8)  | 0   | (0.0 to 0.1) |
| South Africa | Female | 10 to 14 | 3.4 | (2.2 to 4.9) | 2.8  | (1.2 to 6.7)  | 0   | (0.0 to 0.1) |
| South Africa | Female | 15 to 19 | 5.7 | (3.5 to 8.1) | 8.2  | (4.1 to 15.2) | 0.1 | (0.0 to 0.2) |
| South Africa | Both   | 1 to 4   | 0.5 | (0.4 to 0.7) | 3.3  | (1.1 to 10.2) | 0   | (0.0 to 0.1) |

|              |        |          |     |              |      |                |     |              |
|--------------|--------|----------|-----|--------------|------|----------------|-----|--------------|
| South Africa | Both   | 5 to 9   | 1.7 | (1.2 to 2.2) | 2    | (0.9 to 5.2)   | 0   | (0.0 to 0.1) |
| South Africa | Both   | 10 to 14 | 3.5 | (2.6 to 4.5) | 2.4  | (1.4 to 4.7)   | 0   | (0.0 to 0.1) |
| South Africa | Both   | 15 to 19 | 5.7 | (4.1 to 7.7) | 10.6 | (6.4 to 16.7)  | 0.1 | (0.1 to 0.2) |
| Swaziland    | Male   | 1 to 4   | 0.6 | (0.3 to 0.8) | 9.9  | (2.9 to 29.0)  | 0.1 | (0.0 to 0.3) |
| Swaziland    | Male   | 5 to 9   | 1.7 | (1.0 to 2.5) | 4.7  | (1.9 to 10.8)  | 0.1 | (0.0 to 0.1) |
| Swaziland    | Male   | 10 to 14 | 3.6 | (2.2 to 5.1) | 4.2  | (2.0 to 8.8)   | 0   | (0.0 to 0.1) |
| Swaziland    | Male   | 15 to 19 | 6   | (3.6 to 8.7) | 15.9 | (6.5 to 33.4)  | 0.2 | (0.1 to 0.5) |
| Swaziland    | Female | 1 to 4   | 0.5 | (0.3 to 0.7) | 13.2 | (3.7 to 30.4)  | 0.2 | (0.0 to 0.4) |
| Swaziland    | Female | 5 to 9   | 1.6 | (1.1 to 2.3) | 7.4  | (2.7 to 17.8)  | 0.1 | (0.0 to 0.2) |
| Swaziland    | Female | 10 to 14 | 3.4 | (2.3 to 4.9) | 3.8  | (1.7 to 7.8)   | 0   | (0.0 to 0.1) |
| Swaziland    | Female | 15 to 19 | 5.6 | (3.5 to 8.2) | 13.8 | (6.2 to 30.1)  | 0.2 | (0.1 to 0.4) |
| Swaziland    | Both   | 1 to 4   | 0.5 | (0.4 to 0.7) | 11.5 | (4.7 to 24.8)  | 0.1 | (0.1 to 0.3) |
| Swaziland    | Both   | 5 to 9   | 1.7 | (1.2 to 2.2) | 6    | (2.8 to 12.4)  | 0.1 | (0.0 to 0.2) |
| Swaziland    | Both   | 10 to 14 | 3.5 | (2.5 to 4.4) | 4    | (2.2 to 6.9)   | 0   | (0.0 to 0.1) |
| Swaziland    | Both   | 15 to 19 | 5.8 | (4.0 to 7.6) | 14.8 | (8.0 to 26.7)  | 0.2 | (0.1 to 0.4) |
| Zimbabwe     | Male   | 1 to 4   | 0.5 | (0.3 to 0.9) | 2.6  | (0.6 to 8.7)   | 0   | (0.0 to 0.1) |
| Zimbabwe     | Male   | 5 to 9   | 1.7 | (1.1 to 2.7) | 1.4  | (0.6 to 4.3)   | 0   | (0.0 to 0.1) |
| Zimbabwe     | Male   | 10 to 14 | 3.7 | (2.4 to 5.3) | 5.6  | (1.9 to 15.8)  | 0.1 | (0.0 to 0.2) |
| Zimbabwe     | Male   | 15 to 19 | 6.1 | (3.9 to 8.8) | 30.8 | (12.3 to 60.3) | 0.4 | (0.2 to 0.9) |
| Zimbabwe     | Female | 1 to 4   | 0.5 | (0.3 to 0.7) | 19.1 | (2.7 to 74.1)  | 0.2 | (0.0 to 0.9) |
| Zimbabwe     | Female | 5 to 9   | 1.6 | (1.1 to 2.3) | 2.1  | (0.7 to 9.0)   | 0   | (0.0 to 0.1) |
| Zimbabwe     | Female | 10 to 14 | 3.4 | (2.3 to 4.7) | 2.2  | (1.0 to 6.2)   | 0   | (0.0 to 0.1) |
| Zimbabwe     | Female | 15 to 19 | 5.6 | (3.5 to 8.0) | 12.4 | (4.8 to 29.6)  | 0.2 | (0.1 to 0.4) |
| Zimbabwe     | Both   | 1 to 4   | 0.5 | (0.4 to 0.7) | 10.8 | (2.0 to 39.2)  | 0.1 | (0.0 to 0.5) |
| Zimbabwe     | Both   | 5 to 9   | 1.7 | (1.2 to 2.2) | 1.8  | (0.7 to 6.0)   | 0   | (0.0 to 0.1) |
| Zimbabwe     | Both   | 10 to 14 | 3.5 | (2.6 to 4.6) | 3.9  | (1.6 to 9.4)   | 0   | (0.0 to 0.1) |
| Zimbabwe     | Both   | 15 to 19 | 5.9 | (4.3 to 7.7) | 21.6 | (10.3 to 41.4) | 0.3 | (0.1 to 0.6) |
| Benin        | Male   | 1 to 4   | 0.7 | (0.4 to 1.0) | 9.7  | (1.7 to 27.1)  | 0.1 | (0.0 to 0.3) |
| Benin        | Male   | 5 to 9   | 2.2 | (1.3 to 3.1) | 3.8  | (1.0 to 10.0)  | 0   | (0.0 to 0.1) |
| Benin        | Male   | 10 to 14 | 4.3 | (2.9 to 6.1) | 8.3  | (2.1 to 17.1)  | 0.1 | (0.0 to 0.2) |
| Benin        | Male   | 15 to 19 | 6.8 | (4.3 to 9.9) | 30.5 | (7.5 to 65.5)  | 0.4 | (0.1 to 0.9) |
| Benin        | Female | 1 to 4   | 0.5 | (0.3 to 0.7) | 10.7 | (1.7 to 37.6)  | 0.1 | (0.0 to 0.4) |
| Benin        | Female | 5 to 9   | 1.6 | (1.0 to 2.2) | 4    | (0.9 to 11.9)  | 0   | (0.0 to 0.1) |

|              |        |          |     |              |      |                 |     |              |
|--------------|--------|----------|-----|--------------|------|-----------------|-----|--------------|
| Benin        | Female | 10 to 14 | 3   | (2.0 to 4.4) | 2.9  | (0.9 to 9.5)    | 0   | (0.0 to 0.1) |
| Benin        | Female | 15 to 19 | 4.7 | (3.1 to 7.0) | 8.9  | (2.3 to 23.0)   | 0.1 | (0.0 to 0.3) |
| Benin        | Both   | 1 to 4   | 0.6 | (0.4 to 0.8) | 10.2 | (2.3 to 26.9)   | 0.1 | (0.0 to 0.3) |
| Benin        | Both   | 5 to 9   | 1.9 | (1.4 to 2.4) | 3.9  | (1.3 to 9.9)    | 0   | (0.0 to 0.1) |
| Benin        | Both   | 10 to 14 | 3.7 | (2.8 to 4.8) | 5.6  | (2.2 to 11.4)   | 0.1 | (0.0 to 0.1) |
| Benin        | Both   | 15 to 19 | 5.8 | (4.1 to 7.6) | 19.7 | (6.8 to 37.4)   | 0.3 | (0.1 to 0.5) |
| Burkina Faso | Male   | 1 to 4   | 0.6 | (0.4 to 0.9) | 5.7  | (1.0 to 16.4)   | 0.1 | (0.0 to 0.2) |
| Burkina Faso | Male   | 5 to 9   | 2   | (1.2 to 2.8) | 2.8  | (0.8 to 7.1)    | 0   | (0.0 to 0.1) |
| Burkina Faso | Male   | 10 to 14 | 3.9 | (2.6 to 5.6) | 4.4  | (1.2 to 8.4)    | 0   | (0.0 to 0.1) |
| Burkina Faso | Male   | 15 to 19 | 6.1 | (3.9 to 9.1) | 15.5 | (2.8 to 33.7)   | 0.2 | (0.0 to 0.5) |
| Burkina Faso | Female | 1 to 4   | 0.5 | (0.3 to 0.7) | 6.2  | (1.2 to 18.7)   | 0.1 | (0.0 to 0.2) |
| Burkina Faso | Female | 5 to 9   | 1.6 | (1.1 to 2.3) | 2.6  | (0.7 to 7.2)    | 0   | (0.0 to 0.1) |
| Burkina Faso | Female | 10 to 14 | 3.2 | (2.1 to 4.6) | 1.7  | (0.7 to 4.7)    | 0   | (0.0 to 0.1) |
| Burkina Faso | Female | 15 to 19 | 5   | (3.1 to 7.2) | 6.1  | (1.8 to 16.3)   | 0.1 | (0.0 to 0.2) |
| Burkina Faso | Both   | 1 to 4   | 0.6 | (0.4 to 0.7) | 6    | (1.8 to 14.3)   | 0.1 | (0.0 to 0.2) |
| Burkina Faso | Both   | 5 to 9   | 1.8 | (1.3 to 2.4) | 2.7  | (1.1 to 6.2)    | 0   | (0.0 to 0.1) |
| Burkina Faso | Both   | 10 to 14 | 3.6 | (2.6 to 4.7) | 3.1  | (1.3 to 5.6)    | 0   | (0.0 to 0.1) |
| Burkina Faso | Both   | 15 to 19 | 5.6 | (3.9 to 7.5) | 10.9 | (3.5 to 21.5)   | 0.1 | (0.0 to 0.3) |
| Cameroon     | Male   | 1 to 4   | 0.6 | (0.4 to 1.0) | 51.5 | (10.5 to 144.3) | 0.6 | (0.1 to 1.7) |
| Cameroon     | Male   | 5 to 9   | 2   | (1.2 to 3.0) | 10.6 | (3.9 to 28.9)   | 0.1 | (0.0 to 0.4) |
| Cameroon     | Male   | 10 to 14 | 4.1 | (2.7 to 6.1) | 15.3 | (6.2 to 29.6)   | 0.2 | (0.1 to 0.4) |
| Cameroon     | Male   | 15 to 19 | 6.4 | (4.1 to 9.5) | 39.3 | (14.4 to 81.1)  | 0.6 | (0.2 to 1.2) |
| Cameroon     | Female | 1 to 4   | 0.5 | (0.4 to 0.8) | 44.5 | (8.9 to 141.0)  | 0.5 | (0.1 to 1.7) |
| Cameroon     | Female | 5 to 9   | 1.6 | (1.1 to 2.3) | 9.9  | (2.7 to 29.9)   | 0.1 | (0.0 to 0.4) |
| Cameroon     | Female | 10 to 14 | 3.2 | (2.2 to 4.5) | 4.9  | (1.6 to 16.8)   | 0.1 | (0.0 to 0.2) |
| Cameroon     | Female | 15 to 19 | 5   | (3.3 to 7.1) | 16   | (6.1 to 38.8)   | 0.2 | (0.1 to 0.6) |
| Cameroon     | Both   | 1 to 4   | 0.6 | (0.4 to 0.8) | 48   | (13.0 to 119.7) | 0.6 | (0.2 to 1.4) |
| Cameroon     | Both   | 5 to 9   | 1.8 | (1.4 to 2.4) | 10.2 | (4.2 to 24.9)   | 0.1 | (0.0 to 0.3) |
| Cameroon     | Both   | 10 to 14 | 3.6 | (2.7 to 4.6) | 10.1 | (4.9 to 18.5)   | 0.1 | (0.1 to 0.2) |
| Cameroon     | Both   | 15 to 19 | 5.7 | (4.2 to 7.5) | 27.7 | (13.2 to 50.1)  | 0.4 | (0.2 to 0.7) |
| Cape Verde   | Male   | 1 to 4   | 0.6 | (0.4 to 0.9) | 31.8 | (3.7 to 109.1)  | 0.4 | (0.0 to 1.3) |
| Cape Verde   | Male   | 5 to 9   | 1.9 | (1.3 to 2.8) | 13.6 | (2.5 to 38.9)   | 0.2 | (0.0 to 0.5) |
| Cape Verde   | Male   | 10 to 14 | 3.9 | (2.5 to 5.6) | 27.3 | (9.7 to 59.8)   | 0.4 | (0.1 to 0.8) |

|               |        |          |     |               |      |                 |     |              |
|---------------|--------|----------|-----|---------------|------|-----------------|-----|--------------|
| Cape Verde    | Male   | 15 to 19 | 6.1 | (3.8 to 9.2)  | 95.9 | (39.3 to 179.7) | 1.4 | (0.6 to 2.6) |
| Cape Verde    | Female | 1 to 4   | 0.5 | (0.3 to 0.7)  | 9.2  | (0.3 to 47.9)   | 0.1 | (0.0 to 0.6) |
| Cape Verde    | Female | 5 to 9   | 1.6 | (1.0 to 2.3)  | 4    | (0.4 to 23.0)   | 0   | (0.0 to 0.3) |
| Cape Verde    | Female | 10 to 14 | 3.2 | (2.2 to 4.5)  | 3.9  | (0.5 to 21.9)   | 0   | (0.0 to 0.3) |
| Cape Verde    | Female | 15 to 19 | 5.1 | (3.3 to 7.3)  | 3.2  | (0.8 to 12.8)   | 0   | (0.0 to 0.2) |
| Cape Verde    | Both   | 1 to 4   | 0.6 | (0.4 to 0.7)  | 20.6 | (2.6 to 70.1)   | 0.2 | (0.0 to 0.8) |
| Cape Verde    | Both   | 5 to 9   | 1.8 | (1.3 to 2.3)  | 8.8  | (1.6 to 27.2)   | 0.1 | (0.0 to 0.3) |
| Cape Verde    | Both   | 10 to 14 | 3.5 | (2.7 to 4.6)  | 15.7 | (5.4 to 36.3)   | 0.2 | (0.1 to 0.5) |
| Cape Verde    | Both   | 15 to 19 | 5.6 | (4.2 to 7.4)  | 50.1 | (20.8 to 93.3)  | 0.7 | (0.3 to 1.3) |
| Chad          | Male   | 1 to 4   | 0.7 | (0.3 to 1.0)  | 31.9 | (5.1 to 109.7)  | 0.4 | (0.1 to 1.3) |
| Chad          | Male   | 5 to 9   | 2   | (1.1 to 3.1)  | 7.6  | (2.0 to 21.4)   | 0.1 | (0.0 to 0.3) |
| Chad          | Male   | 10 to 14 | 4.1 | (2.4 to 6.0)  | 10   | (2.1 to 21.1)   | 0.1 | (0.0 to 0.3) |
| Chad          | Male   | 15 to 19 | 6.5 | (3.8 to 10.0) | 18.9 | (3.8 to 43.1)   | 0.3 | (0.0 to 0.6) |
| Chad          | Female | 1 to 4   | 0.5 | (0.3 to 0.7)  | 49.6 | (7.6 to 161.9)  | 0.6 | (0.1 to 1.9) |
| Chad          | Female | 5 to 9   | 1.6 | (1.0 to 2.3)  | 10.2 | (2.1 to 31.6)   | 0.1 | (0.0 to 0.4) |
| Chad          | Female | 10 to 14 | 3.2 | (2.1 to 4.6)  | 4.4  | (1.2 to 16.8)   | 0.1 | (0.0 to 0.2) |
| Chad          | Female | 15 to 19 | 4.9 | (3.2 to 7.4)  | 10.7 | (2.4 to 27.3)   | 0.1 | (0.0 to 0.4) |
| Chad          | Both   | 1 to 4   | 0.6 | (0.4 to 0.8)  | 40.7 | (8.7 to 106.6)  | 0.5 | (0.1 to 1.3) |
| Chad          | Both   | 5 to 9   | 1.8 | (1.3 to 2.4)  | 8.9  | (3.2 to 23.5)   | 0.1 | (0.0 to 0.3) |
| Chad          | Both   | 10 to 14 | 3.6 | (2.6 to 4.8)  | 7.2  | (2.7 to 15.6)   | 0.1 | (0.0 to 0.2) |
| Chad          | Both   | 15 to 19 | 5.8 | (4.0 to 7.8)  | 14.8 | (4.5 to 28.9)   | 0.2 | (0.1 to 0.4) |
| Cote d'Ivoire | Male   | 1 to 4   | 0.6 | (0.4 to 0.9)  | 34.2 | (8.4 to 90.0)   | 0.4 | (0.1 to 1.1) |
| Cote d'Ivoire | Male   | 5 to 9   | 2.1 | (1.3 to 3.0)  | 9.9  | (3.3 to 27.7)   | 0.1 | (0.0 to 0.3) |
| Cote d'Ivoire | Male   | 10 to 14 | 4.2 | (2.7 to 6.0)  | 14.3 | (5.3 to 29.0)   | 0.2 | (0.1 to 0.4) |
| Cote d'Ivoire | Male   | 15 to 19 | 6.6 | (4.0 to 9.9)  | 40.3 | (15.0 to 80.4)  | 0.6 | (0.2 to 1.1) |
| Cote d'Ivoire | Female | 1 to 4   | 0.5 | (0.3 to 0.8)  | 31.9 | (7.4 to 89.6)   | 0.4 | (0.1 to 1.1) |
| Cote d'Ivoire | Female | 5 to 9   | 1.6 | (1.0 to 2.4)  | 12.3 | (4.0 to 32.0)   | 0.2 | (0.0 to 0.4) |
| Cote d'Ivoire | Female | 10 to 14 | 3.1 | (2.0 to 4.5)  | 5.7  | (1.8 to 18.0)   | 0.1 | (0.0 to 0.2) |
| Cote d'Ivoire | Female | 15 to 19 | 4.8 | (3.0 to 7.0)  | 19.3 | (7.5 to 46.7)   | 0.3 | (0.1 to 0.7) |
| Cote d'Ivoire | Both   | 1 to 4   | 0.6 | (0.4 to 0.8)  | 33.1 | (10.1 to 76.7)  | 0.4 | (0.1 to 0.9) |
| Cote d'Ivoire | Both   | 5 to 9   | 1.8 | (1.3 to 2.4)  | 11.1 | (4.8 to 26.0)   | 0.1 | (0.1 to 0.3) |
| Cote d'Ivoire | Both   | 10 to 14 | 3.7 | (2.8 to 4.7)  | 10.1 | (4.9 to 19.9)   | 0.1 | (0.1 to 0.3) |
| Cote d'Ivoire | Both   | 15 to 19 | 5.7 | (4.1 to 7.5)  | 29.9 | (15.8 to 53.8)  | 0.4 | (0.2 to 0.8) |

|            |        |          |     |              |      |                 |     |              |
|------------|--------|----------|-----|--------------|------|-----------------|-----|--------------|
| The Gambia | Male   | 1 to 4   | 0.6 | (0.4 to 0.9) | 15.4 | (4.0 to 40.9)   | 0.2 | (0.0 to 0.5) |
| The Gambia | Male   | 5 to 9   | 2   | (1.2 to 2.9) | 5.4  | (2.0 to 13.7)   | 0.1 | (0.0 to 0.2) |
| The Gambia | Male   | 10 to 14 | 4.1 | (2.7 to 5.8) | 11.1 | (4.5 to 22.4)   | 0.1 | (0.1 to 0.3) |
| The Gambia | Male   | 15 to 19 | 6.5 | (4.2 to 9.5) | 31.7 | (11.6 to 65.8)  | 0.4 | (0.2 to 0.9) |
| The Gambia | Female | 1 to 4   | 0.5 | (0.3 to 0.7) | 16.4 | (3.7 to 42.3)   | 0.2 | (0.0 to 0.5) |
| The Gambia | Female | 5 to 9   | 1.6 | (1.1 to 2.3) | 5.7  | (1.7 to 14.4)   | 0.1 | (0.0 to 0.2) |
| The Gambia | Female | 10 to 14 | 3.2 | (2.1 to 4.6) | 4.3  | (1.4 to 13.5)   | 0.1 | (0.0 to 0.2) |
| The Gambia | Female | 15 to 19 | 5   | (3.1 to 7.4) | 13.3 | (4.3 to 30.6)   | 0.2 | (0.0 to 0.4) |
| The Gambia | Both   | 1 to 4   | 0.6 | (0.4 to 0.7) | 15.9 | (5.4 to 33.5)   | 0.2 | (0.1 to 0.4) |
| The Gambia | Both   | 5 to 9   | 1.8 | (1.3 to 2.3) | 5.5  | (2.3 to 12.0)   | 0.1 | (0.0 to 0.1) |
| The Gambia | Both   | 10 to 14 | 3.6 | (2.7 to 4.7) | 7.7  | (3.6 to 14.8)   | 0.1 | (0.0 to 0.2) |
| The Gambia | Both   | 15 to 19 | 5.7 | (4.2 to 7.5) | 22.5 | (9.2 to 41.3)   | 0.3 | (0.1 to 0.6) |
| Ghana      | Male   | 1 to 4   | 0.6 | (0.3 to 1.0) | 31.4 | (10.0 to 72.5)  | 0.4 | (0.1 to 0.9) |
| Ghana      | Male   | 5 to 9   | 2   | (1.3 to 2.9) | 9.5  | (3.2 to 21.1)   | 0.1 | (0.0 to 0.3) |
| Ghana      | Male   | 10 to 14 | 4   | (2.6 to 5.7) | 19   | (8.4 to 33.3)   | 0.2 | (0.1 to 0.4) |
| Ghana      | Male   | 15 to 19 | 6.3 | (3.9 to 9.1) | 43.5 | (20.5 to 82.2)  | 0.6 | (0.3 to 1.2) |
| Ghana      | Female | 1 to 4   | 0.5 | (0.3 to 0.8) | 33   | (10.0 to 76.9)  | 0.4 | (0.1 to 0.9) |
| Ghana      | Female | 5 to 9   | 1.6 | (1.1 to 2.4) | 8.9  | (3.2 to 19.5)   | 0.1 | (0.0 to 0.2) |
| Ghana      | Female | 10 to 14 | 3.2 | (2.1 to 4.5) | 2.9  | (1.1 to 5.9)    | 0   | (0.0 to 0.1) |
| Ghana      | Female | 15 to 19 | 4.9 | (3.0 to 7.1) | 13   | (5.3 to 25.8)   | 0.2 | (0.1 to 0.4) |
| Ghana      | Both   | 1 to 4   | 0.6 | (0.4 to 0.8) | 32.2 | (14.4 to 62.5)  | 0.4 | (0.2 to 0.7) |
| Ghana      | Both   | 5 to 9   | 1.8 | (1.3 to 2.4) | 9.2  | (4.2 to 17.1)   | 0.1 | (0.0 to 0.2) |
| Ghana      | Both   | 10 to 14 | 3.6 | (2.7 to 4.7) | 11.1 | (5.4 to 19.0)   | 0.1 | (0.1 to 0.2) |
| Ghana      | Both   | 15 to 19 | 5.6 | (4.1 to 7.3) | 28.6 | (15.8 to 49.9)  | 0.4 | (0.2 to 0.7) |
| Guinea     | Male   | 1 to 4   | 0.7 | (0.4 to 1.0) | 42.8 | (8.9 to 118.5)  | 0.5 | (0.1 to 1.4) |
| Guinea     | Male   | 5 to 9   | 2   | (1.2 to 3.1) | 13.4 | (4.2 to 34.8)   | 0.2 | (0.0 to 0.4) |
| Guinea     | Male   | 10 to 14 | 4.1 | (2.7 to 6.0) | 19.1 | (7.0 to 37.8)   | 0.2 | (0.1 to 0.5) |
| Guinea     | Male   | 15 to 19 | 6.4 | (4.2 to 9.3) | 45.1 | (15.7 to 94.6)  | 0.6 | (0.2 to 1.4) |
| Guinea     | Female | 1 to 4   | 0.5 | (0.3 to 0.8) | 40.5 | (6.6 to 138.6)  | 0.5 | (0.1 to 1.6) |
| Guinea     | Female | 5 to 9   | 1.6 | (1.1 to 2.3) | 13.3 | (3.1 to 40.1)   | 0.2 | (0.0 to 0.5) |
| Guinea     | Female | 10 to 14 | 3.2 | (2.1 to 4.5) | 7.6  | (2.0 to 27.1)   | 0.1 | (0.0 to 0.4) |
| Guinea     | Female | 15 to 19 | 5   | (3.1 to 7.1) | 19.7 | (6.7 to 51.1)   | 0.3 | (0.1 to 0.7) |
| Guinea     | Both   | 1 to 4   | 0.6 | (0.4 to 0.8) | 41.7 | (10.8 to 104.1) | 0.5 | (0.1 to 1.2) |



|               |        |          |     |              |       |                 |     |              |
|---------------|--------|----------|-----|--------------|-------|-----------------|-----|--------------|
| Guinea        | Both   | 5 to 9   | 1.8 | (1.3 to 2.5) | 13.4  | (4.8 to 31.4)   | 0.2 | (0.1 to 0.4) |
| Guinea        | Both   | 10 to 14 | 3.7 | (2.7 to 4.7) | 13.4  | (5.9 to 26.9)   | 0.2 | (0.1 to 0.4) |
| Guinea        | Both   | 15 to 19 | 5.7 | (4.3 to 7.4) | 32.5  | (15.4 to 58.3)  | 0.5 | (0.2 to 0.8) |
| Guinea-Bissau | Male   | 1 to 4   | 0.6 | (0.4 to 1.0) | 77.7  | (13.1 to 236.1) | 0.9 | (0.2 to 2.8) |
| Guinea-Bissau | Male   | 5 to 9   | 2   | (1.1 to 3.0) | 27.3  | (7.8 to 89.1)   | 0.3 | (0.1 to 1.1) |
| Guinea-Bissau | Male   | 10 to 14 | 4   | (2.4 to 5.7) | 32.4  | (13.9 to 75.5)  | 0.4 | (0.2 to 1.0) |
| Guinea-Bissau | Male   | 15 to 19 | 6.3 | (3.7 to 9.2) | 65.1  | (28.5 to 132.3) | 0.9 | (0.4 to 1.9) |
| Guinea-Bissau | Female | 1 to 4   | 0.5 | (0.3 to 0.7) | 102.7 | (15.6 to 453.6) | 1.2 | (0.2 to 5.4) |
| Guinea-Bissau | Female | 5 to 9   | 1.6 | (1.0 to 2.2) | 37.6  | (6.8 to 170.8)  | 0.5 | (0.1 to 2.1) |
| Guinea-Bissau | Female | 10 to 14 | 3.1 | (2.1 to 4.3) | 21.7  | (2.9 to 118.1)  | 0.3 | (0.0 to 1.6) |
| Guinea-Bissau | Female | 15 to 19 | 4.9 | (3.1 to 6.9) | 45.1  | (11.0 to 179.9) | 0.6 | (0.1 to 2.6) |
| Guinea-Bissau | Both   | 1 to 4   | 0.6 | (0.4 to 0.8) | 90.1  | (17.6 to 294.8) | 1.1 | (0.2 to 3.5) |
| Guinea-Bissau | Both   | 5 to 9   | 1.8 | (1.3 to 2.3) | 32.4  | (9.2 to 115.2)  | 0.4 | (0.1 to 1.4) |
| Guinea-Bissau | Both   | 10 to 14 | 3.6 | (2.7 to 4.6) | 27    | (9.9 to 85.2)   | 0.4 | (0.1 to 1.1) |
| Guinea-Bissau | Both   | 15 to 19 | 5.6 | (4.0 to 7.3) | 55.1  | (25.3 to 129.5) | 0.8 | (0.4 to 1.9) |
| Liberia       | Male   | 1 to 4   | 0.7 | (0.4 to 1.1) | 17.2  | (3.5 to 49.0)   | 0.2 | (0.0 to 0.6) |
| Liberia       | Male   | 5 to 9   | 2   | (1.2 to 3.1) | 8.7   | (2.6 to 19.8)   | 0.1 | (0.0 to 0.2) |
| Liberia       | Male   | 10 to 14 | 4   | (2.6 to 6.0) | 14.2  | (5.8 to 28.2)   | 0.2 | (0.1 to 0.4) |
| Liberia       | Male   | 15 to 19 | 6.4 | (3.9 to 9.5) | 39.5  | (13.9 to 82.8)  | 0.6 | (0.2 to 1.2) |
| Liberia       | Female | 1 to 4   | 0.5 | (0.3 to 0.7) | 18.7  | (2.5 to 64.6)   | 0.2 | (0.0 to 0.8) |
| Liberia       | Female | 5 to 9   | 1.6 | (1.0 to 2.2) | 8.8   | (2.1 to 26.5)   | 0.1 | (0.0 to 0.3) |
| Liberia       | Female | 10 to 14 | 3.2 | (2.1 to 4.4) | 6     | (1.5 to 22.6)   | 0.1 | (0.0 to 0.3) |
| Liberia       | Female | 15 to 19 | 4.9 | (3.0 to 7.0) | 15.8  | (4.8 to 48.2)   | 0.2 | (0.1 to 0.7) |
| Liberia       | Both   | 1 to 4   | 0.6 | (0.4 to 0.8) | 17.9  | (4.3 to 45.5)   | 0.2 | (0.0 to 0.5) |
| Liberia       | Both   | 5 to 9   | 1.8 | (1.3 to 2.4) | 8.7   | (3.2 to 19.9)   | 0.1 | (0.0 to 0.2) |
| Liberia       | Both   | 10 to 14 | 3.6 | (2.7 to 4.7) | 10.2  | (4.5 to 19.1)   | 0.1 | (0.1 to 0.2) |
| Liberia       | Both   | 15 to 19 | 5.6 | (4.1 to 7.6) | 27.8  | (13.2 to 51.0)  | 0.4 | (0.2 to 0.7) |
| Mali          | Male   | 1 to 4   | 0.6 | (0.4 to 1.0) | 49.2  | (8.6 to 145.7)  | 0.6 | (0.1 to 1.7) |
| Mali          | Male   | 5 to 9   | 2   | (1.2 to 2.9) | 17.1  | (5.0 to 46.1)   | 0.2 | (0.1 to 0.6) |
| Mali          | Male   | 10 to 14 | 3.9 | (2.4 to 6.0) | 21.7  | (9.4 to 43.3)   | 0.3 | (0.1 to 0.6) |
| Mali          | Male   | 15 to 19 | 6.2 | (3.5 to 9.7) | 44    | (15.7 to 93.2)  | 0.6 | (0.2 to 1.3) |
| Mali          | Female | 1 to 4   | 0.5 | (0.3 to 0.8) | 43.8  | (11.3 to 109.1) | 0.5 | (0.1 to 1.3) |
| Mali          | Female | 5 to 9   | 1.6 | (1.1 to 2.4) | 12    | (3.5 to 28.3)   | 0.1 | (0.0 to 0.4) |

|            |        |          |     |              |      |                 |     |              |
|------------|--------|----------|-----|--------------|------|-----------------|-----|--------------|
| Mali       | Female | 10 to 14 | 3.2 | (2.2 to 4.5) | 11   | (3.1 to 33.5)   | 0.1 | (0.0 to 0.4) |
| Mali       | Female | 15 to 19 | 4.9 | (3.1 to 7.3) | 38.8 | (13.6 to 86.0)  | 0.5 | (0.2 to 1.2) |
| Mali       | Both   | 1 to 4   | 0.6 | (0.4 to 0.8) | 46.5 | (13.1 to 107.2) | 0.5 | (0.2 to 1.3) |
| Mali       | Both   | 5 to 9   | 1.8 | (1.3 to 2.4) | 14.6 | (6.0 to 30.0)   | 0.2 | (0.1 to 0.4) |
| Mali       | Both   | 10 to 14 | 3.5 | (2.6 to 4.7) | 16.5 | (7.8 to 30.8)   | 0.2 | (0.1 to 0.4) |
| Mali       | Both   | 15 to 19 | 5.5 | (3.9 to 7.5) | 41.5 | (20.9 to 69.2)  | 0.6 | (0.3 to 1.0) |
| Mauritania | Male   | 1 to 4   | 0.6 | (0.4 to 0.9) | 19.2 | (4.3 to 50.6)   | 0.2 | (0.0 to 0.6) |
| Mauritania | Male   | 5 to 9   | 1.9 | (1.2 to 2.9) | 7.4  | (2.5 to 19.7)   | 0.1 | (0.0 to 0.2) |
| Mauritania | Male   | 10 to 14 | 3.9 | (2.5 to 5.6) | 13.1 | (5.3 to 25.7)   | 0.2 | (0.1 to 0.3) |
| Mauritania | Male   | 15 to 19 | 6.1 | (3.8 to 9.0) | 33.6 | (11.8 to 72.5)  | 0.5 | (0.2 to 1.0) |
| Mauritania | Female | 1 to 4   | 0.5 | (0.3 to 0.8) | 16.6 | (3.4 to 46.2)   | 0.2 | (0.0 to 0.5) |
| Mauritania | Female | 5 to 9   | 1.6 | (1.0 to 2.3) | 7.4  | (2.4 to 19.8)   | 0.1 | (0.0 to 0.2) |
| Mauritania | Female | 10 to 14 | 3.2 | (2.0 to 4.4) | 4.8  | (1.7 to 14.3)   | 0.1 | (0.0 to 0.2) |
| Mauritania | Female | 15 to 19 | 4.9 | (3.1 to 7.0) | 12.2 | (4.7 to 27.8)   | 0.2 | (0.1 to 0.4) |
| Mauritania | Both   | 1 to 4   | 0.6 | (0.4 to 0.8) | 17.9 | (5.2 to 42.4)   | 0.2 | (0.1 to 0.5) |
| Mauritania | Both   | 5 to 9   | 1.8 | (1.3 to 2.3) | 7.4  | (2.9 to 16.9)   | 0.1 | (0.0 to 0.2) |
| Mauritania | Both   | 10 to 14 | 3.5 | (2.7 to 4.5) | 9    | (4.2 to 17.3)   | 0.1 | (0.0 to 0.2) |
| Mauritania | Both   | 15 to 19 | 5.5 | (4.1 to 7.2) | 23.1 | (9.7 to 44.5)   | 0.3 | (0.1 to 0.6) |
| Niger      | Male   | 1 to 4   | 0.6 | (0.3 to 1.0) | 19.6 | (2.0 to 58.8)   | 0.2 | (0.0 to 0.7) |
| Niger      | Male   | 5 to 9   | 2   | (1.2 to 3.0) | 4.6  | (0.8 to 12.9)   | 0.1 | (0.0 to 0.2) |
| Niger      | Male   | 10 to 14 | 4.1 | (2.6 to 5.8) | 6.9  | (1.1 to 15.6)   | 0.1 | (0.0 to 0.2) |
| Niger      | Male   | 15 to 19 | 6.3 | (3.9 to 9.4) | 14.5 | (1.9 to 36.9)   | 0.2 | (0.0 to 0.5) |
| Niger      | Female | 1 to 4   | 0.5 | (0.3 to 0.8) | 34   | (1.9 to 131.6)  | 0.4 | (0.0 to 1.6) |
| Niger      | Female | 5 to 9   | 1.6 | (1.0 to 2.4) | 9.2  | (0.7 to 31.2)   | 0.1 | (0.0 to 0.4) |
| Niger      | Female | 10 to 14 | 3.1 | (1.9 to 4.5) | 4.6  | (0.8 to 21.1)   | 0.1 | (0.0 to 0.3) |
| Niger      | Female | 15 to 19 | 4.8 | (2.9 to 7.4) | 9.9  | (1.2 to 30.1)   | 0.1 | (0.0 to 0.4) |
| Niger      | Both   | 1 to 4   | 0.6 | (0.4 to 0.7) | 26.6 | (3.3 to 76.4)   | 0.3 | (0.0 to 0.9) |
| Niger      | Both   | 5 to 9   | 1.8 | (1.3 to 2.3) | 6.9  | (1.5 to 19.1)   | 0.1 | (0.0 to 0.2) |
| Niger      | Both   | 10 to 14 | 3.6 | (2.7 to 4.7) | 5.8  | (1.6 to 14.5)   | 0.1 | (0.0 to 0.2) |
| Niger      | Both   | 15 to 19 | 5.5 | (4.1 to 7.5) | 12.2 | (2.5 to 27.1)   | 0.2 | (0.0 to 0.4) |
| Nigeria    | Male   | 1 to 4   | 0.7 | (0.4 to 1.0) | 41.9 | (7.7 to 150.0)  | 0.5 | (0.1 to 1.8) |
| Nigeria    | Male   | 5 to 9   | 2.1 | (1.3 to 3.1) | 9.3  | (2.5 to 25.8)   | 0.1 | (0.0 to 0.3) |
| Nigeria    | Male   | 10 to 14 | 4.1 | (2.7 to 5.9) | 10.6 | (4.0 to 22.4)   | 0.1 | (0.0 to 0.3) |

|                       |        |          |     |              |      |                 |     |              |
|-----------------------|--------|----------|-----|--------------|------|-----------------|-----|--------------|
| Nigeria               | Male   | 15 to 19 | 6.5 | (4.0 to 9.6) | 16.9 | (6.7 to 32.8)   | 0.2 | (0.1 to 0.5) |
| Nigeria               | Female | 1 to 4   | 0.5 | (0.3 to 0.8) | 52.8 | (8.8 to 194.4)  | 0.6 | (0.1 to 2.3) |
| Nigeria               | Female | 5 to 9   | 1.7 | (1.1 to 2.3) | 8.3  | (2.2 to 25.2)   | 0.1 | (0.0 to 0.3) |
| Nigeria               | Female | 10 to 14 | 3.3 | (2.1 to 4.7) | 4.1  | (1.2 to 14.5)   | 0   | (0.0 to 0.2) |
| Nigeria               | Female | 15 to 19 | 5.1 | (3.1 to 7.6) | 10.9 | (4.4 to 23.8)   | 0.1 | (0.1 to 0.3) |
| Nigeria               | Both   | 1 to 4   | 0.6 | (0.4 to 0.8) | 47.2 | (10.8 to 138.0) | 0.6 | (0.1 to 1.6) |
| Nigeria               | Both   | 5 to 9   | 1.9 | (1.3 to 2.5) | 8.8  | (3.0 to 21.9)   | 0.1 | (0.0 to 0.3) |
| Nigeria               | Both   | 10 to 14 | 3.7 | (2.7 to 4.8) | 7.4  | (3.2 to 15.0)   | 0.1 | (0.0 to 0.2) |
| Nigeria               | Both   | 15 to 19 | 5.8 | (4.2 to 7.8) | 14   | (7.0 to 24.3)   | 0.2 | (0.1 to 0.3) |
| Sao Tome and Principe | Male   | 1 to 4   | 0.6 | (0.4 to 1.0) | 64.9 | (8.4 to 172.8)  | 0.8 | (0.1 to 2.0) |
| Sao Tome and Principe | Male   | 5 to 9   | 2   | (1.2 to 3.0) | 22.7 | (5.3 to 55.3)   | 0.3 | (0.1 to 0.7) |
| Sao Tome and Principe | Male   | 10 to 14 | 4   | (2.6 to 5.7) | 35.6 | (11.4 to 66.9)  | 0.5 | (0.1 to 0.9) |
| Sao Tome and Principe | Male   | 15 to 19 | 6.3 | (4.2 to 9.1) | 127  | (50.0 to 243.5) | 1.8 | (0.7 to 3.5) |
| Sao Tome and Principe | Female | 1 to 4   | 0.5 | (0.4 to 0.8) | 66.6 | (7.2 to 241.7)  | 0.8 | (0.1 to 2.9) |
| Sao Tome and Principe | Female | 5 to 9   | 1.6 | (1.1 to 2.3) | 22.5 | (4.3 to 73.9)   | 0.3 | (0.0 to 0.9) |
| Sao Tome and Principe | Female | 10 to 14 | 3.2 | (2.1 to 4.4) | 18.3 | (5.3 to 44.5)   | 0.2 | (0.1 to 0.6) |
| Sao Tome and Principe | Female | 15 to 19 | 5   | (3.0 to 7.2) | 57.1 | (18.9 to 117.5) | 0.8 | (0.3 to 1.7) |
| Sao Tome and Principe | Both   | 1 to 4   | 0.6 | (0.4 to 0.8) | 65.7 | (11.9 to 187.9) | 0.8 | (0.1 to 2.2) |
| Sao Tome and Principe | Both   | 5 to 9   | 1.8 | (1.3 to 2.4) | 22.6 | (6.5 to 58.6)   | 0.3 | (0.1 to 0.7) |
| Sao Tome and Principe | Both   | 10 to 14 | 3.6 | (2.7 to 4.6) | 27   | (11.2 to 50.3)  | 0.4 | (0.1 to 0.7) |
| Sao Tome and Principe | Both   | 15 to 19 | 5.7 | (4.3 to 7.4) | 92.4 | (41.4 to 156.8) | 1.3 | (0.6 to 2.3) |
| Senegal               | Male   | 1 to 4   | 0.7 | (0.4 to 1.0) | 14   | (3.7 to 39.0)   | 0.2 | (0.0 to 0.5) |
| Senegal               | Male   | 5 to 9   | 2.1 | (1.3 to 3.0) | 5.1  | (1.6 to 12.9)   | 0.1 | (0.0 to 0.2) |
| Senegal               | Male   | 10 to 14 | 4.1 | (2.7 to 5.8) | 11   | (4.5 to 22.0)   | 0.1 | (0.0 to 0.3) |
| Senegal               | Male   | 15 to 19 | 6.3 | (3.9 to 9.3) | 28.4 | (10.5 to 56.0)  | 0.4 | (0.1 to 0.8) |
| Senegal               | Female | 1 to 4   | 0.5 | (0.3 to 0.7) | 15.9 | (3.4 to 45.2)   | 0.2 | (0.0 to 0.5) |
| Senegal               | Female | 5 to 9   | 1.5 | (1.0 to 2.2) | 5.8  | (1.6 to 15.5)   | 0.1 | (0.0 to 0.2) |
| Senegal               | Female | 10 to 14 | 3.1 | (2.0 to 4.3) | 4.5  | (1.3 to 15.3)   | 0.1 | (0.0 to 0.2) |
| Senegal               | Female | 15 to 19 | 4.8 | (2.9 to 6.9) | 10.9 | (3.4 to 26.6)   | 0.1 | (0.0 to 0.4) |
| Senegal               | Both   | 1 to 4   | 0.6 | (0.4 to 0.8) | 15   | (5.0 to 34.5)   | 0.2 | (0.1 to 0.4) |
| Senegal               | Both   | 5 to 9   | 1.8 | (1.3 to 2.4) | 5.4  | (2.1 to 13.3)   | 0.1 | (0.0 to 0.2) |
| Senegal               | Both   | 10 to 14 | 3.6 | (2.7 to 4.6) | 7.8  | (3.5 to 16.1)   | 0.1 | (0.0 to 0.2) |
| Senegal               | Both   | 15 to 19 | 5.6 | (4.2 to 7.4) | 19.7 | (8.8 to 36.0)   | 0.3 | (0.1 to 0.5) |

|              |        |          |     |              |      |                |     |              |
|--------------|--------|----------|-----|--------------|------|----------------|-----|--------------|
| Sierra Leone | Male   | 1 to 4   | 0.7 | (0.4 to 1.0) | 40.2 | (8.0 to 120.5) | 0.5 | (0.1 to 1.4) |
| Sierra Leone | Male   | 5 to 9   | 2.1 | (1.1 to 3.0) | 11.3 | (3.4 to 28.9)  | 0.1 | (0.0 to 0.4) |
| Sierra Leone | Male   | 10 to 14 | 4   | (2.5 to 5.5) | 16.9 | (4.8 to 33.1)  | 0.2 | (0.1 to 0.4) |
| Sierra Leone | Male   | 15 to 19 | 6.3 | (4.1 to 9.0) | 47   | (13.3 to 97.8) | 0.7 | (0.2 to 1.4) |
| Sierra Leone | Female | 1 to 4   | 0.5 | (0.3 to 0.7) | 32.1 | (6.1 to 86.9)  | 0.4 | (0.1 to 1.0) |
| Sierra Leone | Female | 5 to 9   | 1.5 | (0.9 to 2.2) | 10.9 | (2.8 to 31.2)  | 0.1 | (0.0 to 0.4) |
| Sierra Leone | Female | 10 to 14 | 3   | (1.9 to 4.4) | 5.3  | (1.6 to 18.9)  | 0.1 | (0.0 to 0.2) |
| Sierra Leone | Female | 15 to 19 | 4.7 | (2.9 to 6.9) | 16.1 | (5.0 to 41.7)  | 0.2 | (0.1 to 0.6) |
| Sierra Leone | Both   | 1 to 4   | 0.6 | (0.4 to 0.8) | 36.2 | (9.6 to 82.2)  | 0.4 | (0.1 to 1.0) |
| Sierra Leone | Both   | 5 to 9   | 1.8 | (1.3 to 2.4) | 11.1 | (4.1 to 27.8)  | 0.1 | (0.0 to 0.3) |
| Sierra Leone | Both   | 10 to 14 | 3.5 | (2.7 to 4.6) | 11.1 | (4.3 to 22.5)  | 0.1 | (0.1 to 0.3) |
| Sierra Leone | Both   | 15 to 19 | 5.5 | (4.0 to 7.1) | 31.5 | (11.9 to 58.3) | 0.4 | (0.2 to 0.8) |
| Togo         | Male   | 1 to 4   | 0.7 | (0.4 to 1.0) | 29.8 | (6.4 to 74.9)  | 0.4 | (0.1 to 0.9) |
| Togo         | Male   | 5 to 9   | 2   | (1.2 to 2.9) | 7.9  | (2.9 to 18.3)  | 0.1 | (0.0 to 0.2) |
| Togo         | Male   | 10 to 14 | 4   | (2.6 to 5.7) | 10.2 | (3.4 to 19.5)  | 0.1 | (0.0 to 0.3) |
| Togo         | Male   | 15 to 19 | 6.4 | (4.0 to 9.2) | 25   | (7.4 to 54.7)  | 0.3 | (0.1 to 0.8) |
| Togo         | Female | 1 to 4   | 0.5 | (0.3 to 0.8) | 27.1 | (5.5 to 81.9)  | 0.3 | (0.1 to 1.0) |
| Togo         | Female | 5 to 9   | 1.6 | (1.0 to 2.3) | 5.9  | (1.7 to 15.8)  | 0.1 | (0.0 to 0.2) |
| Togo         | Female | 10 to 14 | 3.2 | (2.0 to 4.5) | 2.9  | (1.0 to 8.3)   | 0   | (0.0 to 0.1) |
| Togo         | Female | 15 to 19 | 4.9 | (3.1 to 7.2) | 10.1 | (3.4 to 23.6)  | 0.1 | (0.0 to 0.3) |
| Togo         | Both   | 1 to 4   | 0.6 | (0.4 to 0.8) | 28.5 | (8.1 to 67.0)  | 0.3 | (0.1 to 0.8) |
| Togo         | Both   | 5 to 9   | 1.8 | (1.3 to 2.4) | 6.9  | (3.0 to 15.0)  | 0.1 | (0.0 to 0.2) |
| Togo         | Both   | 10 to 14 | 3.6 | (2.7 to 4.7) | 6.6  | (2.9 to 11.6)  | 0.1 | (0.0 to 0.1) |
| Togo         | Both   | 15 to 19 | 5.6 | (4.1 to 7.6) | 17.6 | (7.1 to 34.0)  | 0.2 | (0.1 to 0.5) |
| South Sudan  | Male   | 1 to 4   | 0.9 | (0.5 to 1.3) | 10.6 | (1.5 to 32.7)  | 0.1 | (0.0 to 0.4) |
| South Sudan  | Male   | 5 to 9   | 2.4 | (1.5 to 3.6) | 5.8  | (1.9 to 13.5)  | 0.1 | (0.0 to 0.2) |
| South Sudan  | Male   | 10 to 14 | 4.4 | (2.7 to 6.5) | 7.5  | (2.9 to 17.4)  | 0.1 | (0.0 to 0.2) |
| South Sudan  | Male   | 15 to 19 | 6.3 | (3.4 to 9.8) | 21.7 | (8.1 to 45.0)  | 0.3 | (0.1 to 0.6) |
| South Sudan  | Female | 1 to 4   | 0.5 | (0.3 to 0.8) | 6.1  | (1.0 to 18.4)  | 0.1 | (0.0 to 0.2) |
| South Sudan  | Female | 5 to 9   | 1.6 | (1.1 to 2.4) | 4.7  | (1.3 to 12.0)  | 0.1 | (0.0 to 0.1) |
| South Sudan  | Female | 10 to 14 | 3   | (2.0 to 4.4) | 4.1  | (1.4 to 11.5)  | 0   | (0.0 to 0.1) |
| South Sudan  | Female | 15 to 19 | 4.4 | (2.7 to 6.7) | 9.5  | (3.8 to 20.5)  | 0.1 | (0.0 to 0.3) |
| South Sudan  | Both   | 1 to 4   | 0.7 | (0.5 to 0.9) | 8.4  | (1.8 to 20.9)  | 0.1 | (0.0 to 0.2) |

|             |        |          |     |              |       |                 |     |              |
|-------------|--------|----------|-----|--------------|-------|-----------------|-----|--------------|
| South Sudan | Both   | 5 to 9   | 2   | (1.5 to 2.7) | 5.3   | (2.0 to 11.4)   | 0.1 | (0.0 to 0.1) |
| South Sudan | Both   | 10 to 14 | 3.7 | (2.7 to 4.9) | 5.9   | (2.6 to 13.0)   | 0.1 | (0.0 to 0.2) |
| South Sudan | Both   | 15 to 19 | 5.3 | (3.6 to 7.4) | 15.7  | (7.5 to 28.0)   | 0.2 | (0.1 to 0.4) |
| Sudan       | Male   | 1 to 4   | 0.5 | (0.3 to 0.7) | 55.4  | (10.3 to 172.0) | 0.7 | (0.1 to 2.0) |
| Sudan       | Male   | 5 to 9   | 1.6 | (1.0 to 2.1) | 16.2  | (5.3 to 38.3)   | 0.2 | (0.1 to 0.5) |
| Sudan       | Male   | 10 to 14 | 3.1 | (1.9 to 4.3) | 25.8  | (8.1 to 53.1)   | 0.3 | (0.1 to 0.7) |
| Sudan       | Male   | 15 to 19 | 4.8 | (2.7 to 6.7) | 43.8  | (16.1 to 84.8)  | 0.6 | (0.2 to 1.2) |
| Sudan       | Female | 1 to 4   | 0.3 | (0.2 to 0.4) | 72.5  | (7.7 to 197.0)  | 0.9 | (0.1 to 2.3) |
| Sudan       | Female | 5 to 9   | 0.9 | (0.6 to 1.3) | 17.3  | (4.8 to 39.9)   | 0.2 | (0.1 to 0.5) |
| Sudan       | Female | 10 to 14 | 1.9 | (1.1 to 2.8) | 25.2  | (7.6 to 57.8)   | 0.3 | (0.1 to 0.8) |
| Sudan       | Female | 15 to 19 | 3   | (1.7 to 4.6) | 26.3  | (9.7 to 56.8)   | 0.4 | (0.1 to 0.8) |
| Sudan       | Both   | 1 to 4   | 0.4 | (0.3 to 0.5) | 63.8  | (11.4 to 143.7) | 0.8 | (0.1 to 1.7) |
| Sudan       | Both   | 5 to 9   | 1.3 | (0.9 to 1.6) | 16.8  | (6.4 to 32.9)   | 0.2 | (0.1 to 0.4) |
| Sudan       | Both   | 10 to 14 | 2.5 | (1.9 to 3.2) | 25.5  | (10.9 to 48.3)  | 0.3 | (0.1 to 0.6) |
| Sudan       | Both   | 15 to 19 | 3.9 | (2.8 to 5.2) | 35.2  | (18.3 to 60.7)  | 0.5 | (0.3 to 0.9) |
| Sudan       | Both   | 10 to 14 | 0.7 | (0.4 to 1.1) | 167.1 | 106.1 to 253.2  | 2.2 | (1.4 to 3.4) |
| Sudan       | Both   | 15 to 19 | 1.2 | (0.6 to 1.7) | 200.7 | 129.0 to 292.0  | 2.9 | (1.9 to 4.2) |
