# Supplementary material
Source: publisher figshare collection journal article supplement (https://karger.figshare.com/articles/dataset/_/4055256)
Supplement: Supplementary file 3 [file 1]

Archive with 3 entries (3 files):
- Web appendix Table 2 by GBD regions.pdf
- Web Appendix Table 1b Childhood HS by country.pdf
- Web Appendix Table 1a Childhood IS by country (1).pdf
