# Supplementary material
Source: publisher figshare collection journal article supplement (https://karger.figshare.com/articles/dataset/_/4055256)
Supplement: Supplementary file 3 [file 1 › Web Appendix Table 1b Childhood HS by country.pdf]

| Hemorrhagic Stroke 2013 |        |           | Prevalence |              | DALY  |                | Deaths |            |
|-------------------------|--------|-----------|------------|--------------|-------|----------------|--------|------------|
| Country                 | Sex    | Age group |            | 95% Ui       |       | 95% Ui         |        | 95% Ui     |
| China                   | Male   | 1 to 4    | 1.2        | 1.1 to 1.3   | 70.6  | 44.3 to 101.7  | 0.8    | 0.5 to 1.2 |
| China                   | Male   | 5 to 9    | 3.4        | 3.1 to 3.7   | 41.3  | 32.3 to 52.2   | 0.5    | 0.4 to 0.7 |
| China                   | Male   | 10 to 14  | 6.7        | 6.2 to 7.3   | 48.1  | 38.1 to 60.1   | 0.6    | 0.5 to 0.8 |
| China                   | Male   | 15 to 19  | 10.5       | 9.6 to 11.4  | 144.8 | 113.4 to 196.5 | 2.1    | 1.6 to 2.8 |
| China                   | Female | 1 to 4    | 0.7        | 0.6 to 0.8   | 36.7  | 21.0 to 49.5   | 0.4    | 0.2 to 0.6 |
| China                   | Female | 5 to 9    | 2.1        | 1.9 to 2.3   | 34.5  | 24.5 to 43.2   | 0.4    | 0.3 to 0.5 |
| China                   | Female | 10 to 14  | 4.2        | 3.8 to 4.6   | 37.9  | 27.0 to 48.3   | 0.5    | 0.4 to 0.6 |
| China                   | Female | 15 to 19  | 6.7        | 6.1 to 7.4   | 57.1  | 38.0 to 73.8   | 0.8    | 0.5 to 1.1 |
| China                   | Both   | 1 to 4    | 0.9        | 0.9 to 1.0   | 54.9  | 36.1 to 75.8   | 0.6    | 0.4 to 0.9 |
| China                   | Both   | 5 to 9    | 2.8        | 2.6 to 3.0   | 38.2  | 31.3 to 45.4   | 0.5    | 0.4 to 0.6 |
| China                   | Both   | 10 to 14  | 5.5        | 5.2 to 5.9   | 43.4  | 36.0 to 51.6   | 0.6    | 0.5 to 0.7 |
| China                   | Both   | 15 to 19  | 8.7        | 8.1 to 9.4   | 103.8 | 85.2 to 132.3  | 1.5    | 1.2 to 1.9 |
| North Korea             | Male   | 1 to 4    | 1.4        | 0.9 to 2.2   | 128.1 | 42.2 to 265.5  | 1.5    | 0.5 to 3.1 |
| North Korea             | Male   | 5 to 9    | 4          | 2.6 to 5.8   | 75.3  | 36.7 to 132.2  | 0.9    | 0.5 to 1.7 |
| North Korea             | Male   | 10 to 14  | 7.8        | 5.2 to 10.9  | 80.7  | 46.1 to 129.3  | 1.1    | 0.6 to 1.7 |
| North Korea             | Male   | 15 to 19  | 12.5       | 8.2 to 17.7  | 290.6 | 168.4 to 451.2 | 4.2    | 2.4 to 6.5 |
| North Korea             | Female | 1 to 4    | 0.8        | 0.5 to 1.2   | 60    | 19.4 to 125.2  | 0.7    | 0.2 to 1.5 |
| North Korea             | Female | 5 to 9    | 2.4        | 1.6 to 3.5   | 58.7  | 25.2 to 103.5  | 0.7    | 0.3 to 1.3 |
| North Korea             | Female | 10 to 14  | 4.8        | 3.3 to 6.6   | 59.1  | 28.9 to 100.3  | 0.8    | 0.4 to 1.3 |
| North Korea             | Female | 15 to 19  | 7.7        | 5.2 to 10.8  | 120.4 | 68.8 to 192.4  | 1.7    | 1.0 to 2.8 |
| North Korea             | Both   | 1 to 4    | 1.1        | 0.8 to 1.5   | 94.8  | 38.6 to 176.4  | 1.1    | 0.5 to 2.1 |
| North Korea             | Both   | 5 to 9    | 3.2        | 2.4 to 4.3   | 67.2  | 35.6 to 103.1  | 0.8    | 0.4 to 1.3 |
| North Korea             | Both   | 10 to 14  | 6.3        | 4.7 to 8.1   | 70.1  | 44.9 to 101.5  | 0.9    | 0.6 to 1.4 |
| North Korea             | Both   | 15 to 19  | 10.2       | 7.5 to 13.3  | 207.5 | 138.0 to 298.4 | 3      | 2.0 to 4.3 |
| Taiwan                  | Male   | 1 to 4    | 2.1        | 1.4 to 3.0   | 67.8  | 34.9 to 117.2  | 0.8    | 0.4 to 1.4 |
| Taiwan                  | Male   | 5 to 9    | 5.8        | 3.9 to 8.0   | 28.8  | 16.8 to 45.6   | 0.4    | 0.2 to 0.6 |
| Taiwan                  | Male   | 10 to 14  | 10.9       | 7.6 to 14.4  | 20.7  | 13.6 to 30.2   | 0.3    | 0.2 to 0.4 |
| Taiwan                  | Male   | 15 to 19  | 16.9       | 11.4 to 22.5 | 33.7  | 22.2 to 50.3   | 0.4    | 0.3 to 0.7 |
| Taiwan                  | Female | 1 to 4    | 1.5        | 0.9 to 2.1   | 47.3  | 19.7 to 98.4   | 0.6    | 0.2 to 1.2 |
| Taiwan                  | Female | 5 to 9    | 4.2        | 2.7 to 5.9   | 40.8  | 23.0 to 66.7   | 0.5    | 0.3 to 0.8 |
| Taiwan                  | Female | 10 to 14  | 8          | 5.4 to 10.8  | 16.3  | 8.8 to 25.5    | 0.2    | 0.1 to 0.3 |

|           |        |          |      |              |       |                |     |            |
|-----------|--------|----------|------|--------------|-------|----------------|-----|------------|
| Taiwan    | Female | 15 to 19 | 12.5 | 8.6 to 16.9  | 35.8  | 21.4 to 51.1   | 0.5 | 0.3 to 0.7 |
| Taiwan    | Both   | 1 to 4   | 1.8  | 1.3 to 2.4   | 58    | 33.7 to 92.8   | 0.7 | 0.4 to 1.1 |
| Taiwan    | Both   | 5 to 9   | 5    | 3.7 to 6.4   | 34.5  | 23.6 to 48.7   | 0.4 | 0.3 to 0.6 |
| Taiwan    | Both   | 10 to 14 | 9.5  | 7.3 to 11.8  | 18.6  | 13.1 to 25.4   | 0.2 | 0.2 to 0.3 |
| Taiwan    | Both   | 15 to 19 | 14.8 | 11.4 to 18.3 | 34.7  | 24.7 to 46.2   | 0.5 | 0.3 to 0.6 |
| Cambodia  | Male   | 1 to 4   | 1.4  | 0.9 to 2.0   | 163.4 | 65.5 to 323.8  | 1.9 | 0.8 to 3.8 |
| Cambodia  | Male   | 5 to 9   | 4    | 2.8 to 5.5   | 59    | 27.2 to 110.9  | 0.7 | 0.3 to 1.4 |
| Cambodia  | Male   | 10 to 14 | 7.8  | 5.3 to 10.7  | 98.6  | 53.3 to 156.5  | 1.3 | 0.7 to 2.1 |
| Cambodia  | Male   | 15 to 19 | 12.4 | 8.3 to 17.3  | 266.4 | 154.0 to 440.8 | 3.8 | 2.2 to 6.3 |
| Cambodia  | Female | 1 to 4   | 0.8  | 0.5 to 1.1   | 95.9  | 38.0 to 193.6  | 1.1 | 0.4 to 2.3 |
| Cambodia  | Female | 5 to 9   | 2.4  | 1.6 to 3.2   | 101.2 | 49.7 to 166.6  | 1.3 | 0.6 to 2.1 |
| Cambodia  | Female | 10 to 14 | 4.8  | 3.3 to 6.6   | 84.2  | 38.9 to 148.9  | 1.1 | 0.5 to 2.0 |
| Cambodia  | Female | 15 to 19 | 8    | 5.1 to 11.1  | 162   | 78.2 to 258.3  | 2.3 | 1.1 to 3.7 |
| Cambodia  | Both   | 1 to 4   | 1.1  | 0.8 to 1.4   | 130.4 | 64.6 to 227.5  | 1.5 | 0.8 to 2.7 |
| Cambodia  | Both   | 5 to 9   | 3.2  | 2.5 to 4.0   | 79.6  | 47.9 to 123.0  | 1   | 0.6 to 1.5 |
| Cambodia  | Both   | 10 to 14 | 6.4  | 4.9 to 8.1   | 91.6  | 55.2 to 134.8  | 1.2 | 0.7 to 1.8 |
| Cambodia  | Both   | 15 to 19 | 10.3 | 7.5 to 13.2  | 216   | 133.0 to 314.6 | 3.1 | 1.9 to 4.5 |
| Indonesia | Male   | 1 to 4   | 1.3  | 0.9 to 1.9   | 17.8  | 5.7 to 39.8    | 0.2 | 0.1 to 0.5 |
| Indonesia | Male   | 5 to 9   | 4.1  | 2.9 to 5.6   | 6.2   | 2.9 to 11.3    | 0.1 | 0.0 to 0.1 |
| Indonesia | Male   | 10 to 14 | 8.1  | 5.9 to 11.1  | 9.4   | 5.3 to 15.5    | 0.1 | 0.1 to 0.2 |
| Indonesia | Male   | 15 to 19 | 13   | 8.9 to 17.2  | 127.2 | 75.8 to 193.7  | 1.8 | 1.1 to 2.8 |
| Indonesia | Female | 1 to 4   | 0.8  | 0.5 to 1.1   | 8.2   | 3.0 to 18.5    | 0.1 | 0.0 to 0.2 |
| Indonesia | Female | 5 to 9   | 2.4  | 1.6 to 3.2   | 16.1  | 6.5 to 33.1    | 0.2 | 0.1 to 0.4 |
| Indonesia | Female | 10 to 14 | 4.9  | 3.1 to 6.8   | 23.7  | 11.8 to 41.7   | 0.3 | 0.2 to 0.5 |
| Indonesia | Female | 15 to 19 | 8.1  | 5.0 to 11.5  | 69.3  | 40.2 to 108.6  | 1   | 0.6 to 1.5 |
| Indonesia | Both   | 1 to 4   | 1.1  | 0.8 to 1.4   | 13.1  | 5.1 to 25.8    | 0.2 | 0.1 to 0.3 |
| Indonesia | Both   | 5 to 9   | 3.3  | 2.5 to 4.2   | 11    | 5.3 to 20.0    | 0.1 | 0.1 to 0.2 |
| Indonesia | Both   | 10 to 14 | 6.5  | 5.0 to 8.2   | 16.3  | 9.4 to 25.5    | 0.2 | 0.1 to 0.3 |
| Indonesia | Both   | 15 to 19 | 10.6 | 8.1 to 13.5  | 98.9  | 68.4 to 133.4  | 1.4 | 1.0 to 1.9 |
| Laos      | Male   | 1 to 4   | 1.3  | 0.8 to 1.9   | 319.3 | 115.7 to 707.1 | 3.8 | 1.4 to 8.4 |
| Laos      | Male   | 5 to 9   | 3.9  | 2.6 to 5.3   | 80.6  | 37.2 to 150.8  | 1   | 0.5 to 1.9 |
| Laos      | Male   | 10 to 14 | 7.8  | 5.5 to 10.4  | 115.8 | 60.9 to 192.7  | 1.5 | 0.8 to 2.6 |
| Laos      | Male   | 15 to 19 | 12.6 | 8.7 to 17.0  | 269.8 | 135.3 to 456.9 | 3.9 | 1.9 to 6.6 |

|          |        |          |      |             |       |                |     |            |
|----------|--------|----------|------|-------------|-------|----------------|-----|------------|
| Laos     | Female | 1 to 4   | 0.7  | 0.4 to 1.0  | 217   | 53.6 to 452.2  | 2.6 | 0.6 to 5.4 |
| Laos     | Female | 5 to 9   | 2.3  | 1.4 to 3.1  | 146.8 | 54.3 to 264.5  | 1.8 | 0.7 to 3.3 |
| Laos     | Female | 10 to 14 | 4.7  | 2.9 to 6.4  | 111.2 | 40.0 to 204.7  | 1.5 | 0.5 to 2.7 |
| Laos     | Female | 15 to 19 | 7.7  | 4.9 to 11.0 | 186.9 | 70.7 to 330.7  | 2.7 | 1.0 to 4.8 |
| Laos     | Both   | 1 to 4   | 1    | 0.7 to 1.3  | 269.2 | 125.7 to 526.2 | 3.2 | 1.5 to 6.2 |
| Laos     | Both   | 5 to 9   | 3.1  | 2.3 to 3.9  | 113   | 59.5 to 180.5  | 1.4 | 0.7 to 2.3 |
| Laos     | Both   | 10 to 14 | 6.3  | 4.8 to 7.8  | 113.6 | 65.3 to 180.1  | 1.5 | 0.9 to 2.4 |
| Laos     | Both   | 15 to 19 | 10.2 | 7.9 to 12.9 | 229   | 125.1 to 358.9 | 3.3 | 1.8 to 5.2 |
| Malaysia | Male   | 1 to 4   | 1.3  | 0.9 to 1.8  | 45.9  | 22.0 to 86.3   | 0.5 | 0.3 to 1.0 |
| Malaysia | Male   | 5 to 9   | 4.1  | 3.0 to 5.4  | 24.8  | 13.6 to 41.1   | 0.3 | 0.2 to 0.5 |
| Malaysia | Male   | 10 to 14 | 8.2  | 6.1 to 10.5 | 49.4  | 30.9 to 73.8   | 0.7 | 0.4 to 1.0 |
| Malaysia | Male   | 15 to 19 | 13.2 | 9.3 to 17.3 | 135.4 | 87.7 to 210.6  | 1.9 | 1.2 to 3.0 |
| Malaysia | Female | 1 to 4   | 0.8  | 0.5 to 1.1  | 27.8  | 13.9 to 49.9   | 0.3 | 0.2 to 0.6 |
| Malaysia | Female | 5 to 9   | 2.5  | 1.7 to 3.4  | 24.7  | 13.4 to 39.9   | 0.3 | 0.2 to 0.5 |
| Malaysia | Female | 10 to 14 | 5.2  | 3.5 to 6.9  | 33.5  | 19.4 to 55.1   | 0.4 | 0.2 to 0.7 |
| Malaysia | Female | 15 to 19 | 8.4  | 5.4 to 11.5 | 55.6  | 34.8 to 82.5   | 0.8 | 0.5 to 1.2 |
| Malaysia | Both   | 1 to 4   | 1.1  | 0.8 to 1.4  | 37.1  | 21.7 to 62.1   | 0.4 | 0.3 to 0.7 |
| Malaysia | Both   | 5 to 9   | 3.3  | 2.5 to 4.0  | 24.7  | 16.1 to 36.3   | 0.3 | 0.2 to 0.5 |
| Malaysia | Both   | 10 to 14 | 6.6  | 5.2 to 8.0  | 41.2  | 28.2 to 57.4   | 0.5 | 0.4 to 0.8 |
| Malaysia | Both   | 15 to 19 | 10.8 | 8.4 to 13.2 | 94.4  | 68.1 to 132.8  | 1.3 | 1.0 to 1.9 |
| Maldives | Male   | 1 to 4   | 1.3  | 0.8 to 1.8  | 253.9 | 110.7 to 445.7 | 3   | 1.3 to 5.3 |
| Maldives | Male   | 5 to 9   | 3.8  | 2.5 to 5.2  | 20    | 3.9 to 45.5    | 0.2 | 0.0 to 0.6 |
| Maldives | Male   | 10 to 14 | 7.8  | 5.2 to 10.6 | 138.3 | 92.4 to 195.1  | 1.8 | 1.2 to 2.6 |
| Maldives | Male   | 15 to 19 | 12.7 | 8.8 to 17.4 | 200.2 | 128.6 to 291.4 | 2.9 | 1.8 to 4.2 |
| Maldives | Female | 1 to 4   | 0.7  | 0.5 to 1.1  | 89.2  | 30.0 to 231.9  | 1.1 | 0.4 to 2.7 |
| Maldives | Female | 5 to 9   | 2.3  | 1.5 to 3.3  | 86.4  | 48.3 to 150.9  | 1.1 | 0.6 to 1.9 |
| Maldives | Female | 10 to 14 | 4.9  | 3.3 to 6.8  | 23.6  | 4.1 to 44.5    | 0.3 | 0.0 to 0.6 |
| Maldives | Female | 15 to 19 | 8    | 5.2 to 11.8 | 59.4  | 26.0 to 91.8   | 0.8 | 0.4 to 1.3 |
| Maldives | Both   | 1 to 4   | 1    | 0.7 to 1.3  | 173.9 | 75.0 to 299.3  | 2.1 | 0.9 to 3.5 |
| Maldives | Both   | 5 to 9   | 3.1  | 2.2 to 4.0  | 52.3  | 29.9 to 79.9   | 0.7 | 0.4 to 1.0 |
| Maldives | Both   | 10 to 14 | 6.3  | 4.7 to 7.9  | 82.4  | 53.3 to 115.0  | 1.1 | 0.7 to 1.5 |
| Maldives | Both   | 15 to 19 | 10.4 | 7.8 to 13.2 | 131.8 | 89.0 to 181.3  | 1.9 | 1.3 to 2.6 |
| Myanmar  | Male   | 1 to 4   | 1.3  | 0.9 to 1.9  | 44.1  | 16.9 to 97.1   | 0.5 | 0.2 to 1.1 |

|             |        |          |      |             |       |               |     |            |
|-------------|--------|----------|------|-------------|-------|---------------|-----|------------|
| Myanmar     | Male   | 5 to 9   | 4    | 2.8 to 5.5  | 42.6  | 18.3 to 80.0  | 0.5 | 0.2 to 1.0 |
| Myanmar     | Male   | 10 to 14 | 8    | 5.8 to 10.6 | 43.4  | 21.5 to 81.3  | 0.6 | 0.3 to 1.1 |
| Myanmar     | Male   | 15 to 19 | 12.9 | 9.1 to 17.7 | 111   | 56.5 to 194.6 | 1.6 | 0.8 to 2.8 |
| Myanmar     | Female | 1 to 4   | 0.7  | 0.5 to 1.0  | 2.1   | 0.8 to 5.0    | 0   | 0.0 to 0.1 |
| Myanmar     | Female | 5 to 9   | 2.3  | 1.5 to 3.2  | 21.2  | 3.9 to 108.0  | 0.3 | 0.0 to 1.4 |
| Myanmar     | Female | 10 to 14 | 4.8  | 3.3 to 6.6  | 23.5  | 6.5 to 87.4   | 0.3 | 0.1 to 1.2 |
| Myanmar     | Female | 15 to 19 | 8    | 5.4 to 11.3 | 23    | 9.9 to 48.4   | 0.3 | 0.1 to 0.7 |
| Myanmar     | Both   | 1 to 4   | 1    | 0.8 to 1.3  | 23.3  | 9.2 to 50.3   | 0.3 | 0.1 to 0.6 |
| Myanmar     | Both   | 5 to 9   | 3.2  | 2.5 to 4.0  | 32    | 13.1 to 83.1  | 0.4 | 0.2 to 1.0 |
| Myanmar     | Both   | 10 to 14 | 6.4  | 5.1 to 7.9  | 33.5  | 17.2 to 73.3  | 0.4 | 0.2 to 1.0 |
| Myanmar     | Both   | 15 to 19 | 10.5 | 8.1 to 13.1 | 67    | 36.7 to 115.3 | 0.9 | 0.5 to 1.6 |
| Philippines | Male   | 1 to 4   | 1.3  | 0.9 to 1.8  | 97    | 44.9 to 180.0 | 1.1 | 0.5 to 2.1 |
| Philippines | Male   | 5 to 9   | 4    | 2.9 to 5.4  | 56.5  | 29.0 to 96.6  | 0.7 | 0.4 to 1.2 |
| Philippines | Male   | 10 to 14 | 8    | 5.7 to 10.4 | 112.5 | 62.0 to 183.5 | 1.5 | 0.8 to 2.5 |
| Philippines | Male   | 15 to 19 | 12.8 | 9.0 to 16.9 | 166.6 | 96.8 to 261.5 | 2.4 | 1.4 to 3.7 |
| Philippines | Female | 1 to 4   | 0.7  | 0.4 to 1.1  | 66.4  | 29.7 to 123.3 | 0.8 | 0.4 to 1.5 |
| Philippines | Female | 5 to 9   | 2.3  | 1.4 to 3.1  | 44.3  | 27.0 to 69.6  | 0.6 | 0.3 to 0.9 |
| Philippines | Female | 10 to 14 | 4.7  | 3.0 to 6.5  | 64.1  | 35.2 to 125.7 | 0.9 | 0.5 to 1.7 |
| Philippines | Female | 15 to 19 | 7.6  | 5.1 to 10.9 | 86.2  | 52.7 to 136.2 | 1.2 | 0.7 to 1.9 |
| Philippines | Both   | 1 to 4   | 1    | 0.8 to 1.3  | 82.1  | 46.9 to 137.6 | 1   | 0.6 to 1.6 |
| Philippines | Both   | 5 to 9   | 3.2  | 2.5 to 3.9  | 50.5  | 33.1 to 73.9  | 0.6 | 0.4 to 0.9 |
| Philippines | Both   | 10 to 14 | 6.4  | 4.9 to 7.7  | 88.9  | 55.8 to 135.8 | 1.2 | 0.7 to 1.8 |
| Philippines | Both   | 15 to 19 | 10.3 | 7.7 to 12.7 | 127.3 | 87.3 to 181.0 | 1.8 | 1.2 to 2.6 |
| Sri Lanka   | Male   | 1 to 4   | 1.4  | 0.9 to 2.0  | 53.3  | 24.8 to 92.1  | 0.6 | 0.3 to 1.1 |
| Sri Lanka   | Male   | 5 to 9   | 4    | 2.7 to 5.6  | 28.3  | 17.5 to 43.2  | 0.3 | 0.2 to 0.5 |
| Sri Lanka   | Male   | 10 to 14 | 7.9  | 5.5 to 10.5 | 41.2  | 26.5 to 59.6  | 0.5 | 0.3 to 0.8 |
| Sri Lanka   | Male   | 15 to 19 | 12.7 | 8.8 to 16.8 | 56.7  | 32.2 to 91.6  | 0.8 | 0.4 to 1.3 |
| Sri Lanka   | Female | 1 to 4   | 0.8  | 0.5 to 1.1  | 41.2  | 23.0 to 81.5  | 0.5 | 0.3 to 1.0 |
| Sri Lanka   | Female | 5 to 9   | 2.4  | 1.6 to 3.3  | 37.1  | 21.0 to 56.6  | 0.5 | 0.3 to 0.7 |
| Sri Lanka   | Female | 10 to 14 | 5    | 3.4 to 6.9  | 36.9  | 22.1 to 60.5  | 0.5 | 0.3 to 0.8 |
| Sri Lanka   | Female | 15 to 19 | 8.2  | 5.4 to 11.4 | 35.3  | 20.3 to 54.0  | 0.5 | 0.3 to 0.8 |
| Sri Lanka   | Both   | 1 to 4   | 1.1  | 0.8 to 1.4  | 47.4  | 26.5 to 76.8  | 0.6 | 0.3 to 0.9 |
| Sri Lanka   | Both   | 5 to 9   | 3.2  | 2.4 to 4.1  | 32.7  | 21.5 to 45.9  | 0.4 | 0.3 to 0.6 |

|             |        |          |      |             |       |                |     |            |
|-------------|--------|----------|------|-------------|-------|----------------|-----|------------|
| Sri Lanka   | Both   | 10 to 14 | 6.4  | 5.0 to 8.1  | 39.1  | 28.9 to 53.8   | 0.5 | 0.4 to 0.7 |
| Sri Lanka   | Both   | 15 to 19 | 10.5 | 8.0 to 13.2 | 46.1  | 32.0 to 65.3   | 0.6 | 0.4 to 0.9 |
| Thailand    | Male   | 1 to 4   | 1.3  | 0.8 to 1.7  | 36.6  | 15.9 to 73.2   | 0.4 | 0.2 to 0.9 |
| Thailand    | Male   | 5 to 9   | 3.8  | 2.6 to 5.0  | 43.5  | 23.4 to 76.9   | 0.5 | 0.3 to 1.0 |
| Thailand    | Male   | 10 to 14 | 7.6  | 5.1 to 10.0 | 69.8  | 43.1 to 109.7  | 0.9 | 0.6 to 1.5 |
| Thailand    | Male   | 15 to 19 | 12.2 | 7.9 to 16.6 | 272.1 | 160.1 to 433.6 | 3.9 | 2.3 to 6.2 |
| Thailand    | Female | 1 to 4   | 0.7  | 0.5 to 1.1  | 28.3  | 10.2 to 59.2   | 0.3 | 0.1 to 0.7 |
| Thailand    | Female | 5 to 9   | 2.3  | 1.5 to 3.3  | 32.2  | 17.1 to 56.1   | 0.4 | 0.2 to 0.7 |
| Thailand    | Female | 10 to 14 | 4.8  | 3.1 to 6.7  | 42.7  | 21.0 to 75.1   | 0.6 | 0.3 to 1.0 |
| Thailand    | Female | 15 to 19 | 7.9  | 5.2 to 11.2 | 69.8  | 37.8 to 124.0  | 1   | 0.5 to 1.8 |
| Thailand    | Both   | 1 to 4   | 1    | 0.7 to 1.3  | 32.5  | 16.8 to 58.4   | 0.4 | 0.2 to 0.7 |
| Thailand    | Both   | 5 to 9   | 3.1  | 2.3 to 3.8  | 38    | 23.6 to 58.4   | 0.5 | 0.3 to 0.7 |
| Thailand    | Both   | 10 to 14 | 6.2  | 4.8 to 7.6  | 56.5  | 37.5 to 80.7   | 0.7 | 0.5 to 1.1 |
| Thailand    | Both   | 15 to 19 | 10.1 | 7.4 to 12.8 | 172   | 110.7 to 255.0 | 2.5 | 1.6 to 3.7 |
| Timor-Leste | Male   | 1 to 4   | 1.4  | 0.8 to 1.9  | 177.1 | 74.6 to 364.1  | 2.1 | 0.9 to 4.3 |
| Timor-Leste | Male   | 5 to 9   | 4    | 2.6 to 5.4  | 53.3  | 23.8 to 102.6  | 0.7 | 0.3 to 1.3 |
| Timor-Leste | Male   | 10 to 14 | 7.8  | 5.6 to 10.5 | 82.4  | 44.4 to 140.9  | 1.1 | 0.6 to 1.9 |
| Timor-Leste | Male   | 15 to 19 | 12.4 | 8.9 to 16.8 | 191.6 | 103.2 to 311.2 | 2.7 | 1.5 to 4.5 |
| Timor-Leste | Female | 1 to 4   | 0.7  | 0.5 to 1.0  | 88.6  | 33.0 to 209.9  | 1   | 0.4 to 2.5 |
| Timor-Leste | Female | 5 to 9   | 2.3  | 1.6 to 3.2  | 88.1  | 41.4 to 174.7  | 1.1 | 0.5 to 2.2 |
| Timor-Leste | Female | 10 to 14 | 4.8  | 3.2 to 6.7  | 71.1  | 32.3 to 142.6  | 0.9 | 0.4 to 1.9 |
| Timor-Leste | Female | 15 to 19 | 7.9  | 5.0 to 11.4 | 108.2 | 48.9 to 213.6  | 1.5 | 0.7 to 3.1 |
| Timor-Leste | Both   | 1 to 4   | 1.1  | 0.7 to 1.4  | 133.8 | 64.9 to 260.2  | 1.6 | 0.8 to 3.1 |
| Timor-Leste | Both   | 5 to 9   | 3.2  | 2.4 to 4.0  | 70.4  | 39.4 to 119.2  | 0.9 | 0.5 to 1.5 |
| Timor-Leste | Both   | 10 to 14 | 6.3  | 4.9 to 7.9  | 76.8  | 47.4 to 124.0  | 1   | 0.6 to 1.7 |
| Timor-Leste | Both   | 15 to 19 | 10.2 | 7.8 to 13.1 | 150.7 | 95.1 to 222.2  | 2.2 | 1.4 to 3.2 |
| Vietnam     | Male   | 1 to 4   | 1.3  | 0.9 to 1.9  | 27.4  | 11.5 to 55.5   | 0.3 | 0.1 to 0.7 |
| Vietnam     | Male   | 5 to 9   | 4    | 2.6 to 5.5  | 1.2   | 0.8 to 1.8     | 0   | 0.0 to 0.0 |
| Vietnam     | Male   | 10 to 14 | 8    | 5.2 to 10.8 | 2.4   | 1.6 to 3.4     | 0   | 0.0 to 0.0 |
| Vietnam     | Male   | 15 to 19 | 12.8 | 8.4 to 17.7 | 66.7  | 39.1 to 109.3  | 0.9 | 0.5 to 1.5 |
| Vietnam     | Female | 1 to 4   | 0.7  | 0.5 to 1.1  | 3.5   | 1.3 to 7.4     | 0   | 0.0 to 0.1 |
| Vietnam     | Female | 5 to 9   | 2.3  | 1.5 to 3.2  | 4.1   | 1.9 to 7.4     | 0   | 0.0 to 0.1 |
| Vietnam     | Female | 10 to 14 | 4.6  | 3.1 to 6.5  | 5.6   | 2.7 to 10.2    | 0.1 | 0.0 to 0.1 |

|                  |        |          |      |             |       |                 |     |             |
|------------------|--------|----------|------|-------------|-------|-----------------|-----|-------------|
| Vietnam          | Female | 15 to 19 | 7.6  | 4.7 to 11.4 | 18.2  | 9.3 to 31.4     | 0.2 | 0.1 to 0.4  |
| Vietnam          | Both   | 1 to 4   | 1.1  | 0.8 to 1.4  | 16    | 7.1 to 31.1     | 0.2 | 0.1 to 0.4  |
| Vietnam          | Both   | 5 to 9   | 3.2  | 2.3 to 4.1  | 2.6   | 1.5 to 4.2      | 0   | 0.0 to 0.0  |
| Vietnam          | Both   | 10 to 14 | 6.3  | 4.8 to 7.9  | 3.9   | 2.4 to 6.2      | 0   | 0.0 to 0.1  |
| Vietnam          | Both   | 15 to 19 | 10.3 | 7.7 to 13.1 | 43.1  | 27.8 to 66.2    | 0.6 | 0.4 to 0.9  |
| Fiji             | Male   | 1 to 4   | 1.4  | 0.9 to 2.0  | 322.3 | 106.5 to 721.7  | 3.8 | 1.3 to 8.5  |
| Fiji             | Male   | 5 to 9   | 4.2  | 2.9 to 5.6  | 180.4 | 76.9 to 356.4   | 2.3 | 1.0 to 4.5  |
| Fiji             | Male   | 10 to 14 | 8.2  | 5.6 to 10.6 | 107   | 52.2 to 189.3   | 1.4 | 0.7 to 2.5  |
| Fiji             | Male   | 15 to 19 | 13.1 | 8.9 to 17.4 | 371.1 | 222.8 to 614.8  | 5.3 | 3.2 to 8.9  |
| Fiji             | Female | 1 to 4   | 0.8  | 0.5 to 1.1  | 242.9 | 74.6 to 517.2   | 2.9 | 0.9 to 6.1  |
| Fiji             | Female | 5 to 9   | 2.5  | 1.7 to 3.4  | 186.5 | 84.4 to 338.0   | 2.3 | 1.1 to 4.3  |
| Fiji             | Female | 10 to 14 | 5.1  | 3.5 to 6.9  | 225.6 | 115.0 to 382.5  | 3   | 1.5 to 5.1  |
| Fiji             | Female | 15 to 19 | 8.4  | 5.7 to 11.6 | 130.5 | 70.2 to 225.2   | 1.9 | 1.0 to 3.2  |
| Fiji             | Both   | 1 to 4   | 1.1  | 0.8 to 1.5  | 283.7 | 101.5 to 545.7  | 3.4 | 1.2 to 6.5  |
| Fiji             | Both   | 5 to 9   | 3.4  | 2.5 to 4.2  | 183.3 | 96.3 to 312.8   | 2.3 | 1.2 to 3.9  |
| Fiji             | Both   | 10 to 14 | 6.7  | 4.9 to 8.2  | 164.2 | 101.1 to 262.7  | 2.2 | 1.3 to 3.5  |
| Fiji             | Both   | 15 to 19 | 10.8 | 8.0 to 13.4 | 254.4 | 161.7 to 388.1  | 3.7 | 2.3 to 5.6  |
| Kiribati         | Male   | 1 to 4   | 1.4  | 0.9 to 1.9  | 621.6 | 270.5 to 1168.9 | 7.4 | 3.2 to 13.8 |
| Kiribati         | Male   | 5 to 9   | 4.1  | 2.9 to 5.6  | 317.9 | 197.1 to 494.1  | 4   | 2.5 to 6.2  |
| Kiribati         | Male   | 10 to 14 | 8    | 5.8 to 11.1 | 199.6 | 123.1 to 314.6  | 2.7 | 1.6 to 4.2  |
| Kiribati         | Male   | 15 to 19 | 12.9 | 8.9 to 18.2 | 759.7 | 466.4 to 1209.3 | 11  | 6.7 to 17.5 |
| Kiribati         | Female | 1 to 4   | 0.8  | 0.5 to 1.1  | 285   | 113.8 to 558.1  | 3.4 | 1.3 to 6.6  |
| Kiribati         | Female | 5 to 9   | 2.4  | 1.7 to 3.3  | 131.8 | 61.9 to 233.3   | 1.7 | 0.8 to 2.9  |
| Kiribati         | Female | 10 to 14 | 4.9  | 3.4 to 6.6  | 251.1 | 137.9 to 409.2  | 3.4 | 1.8 to 5.5  |
| Kiribati         | Female | 15 to 19 | 8    | 5.3 to 11.0 | 130.6 | 60.8 to 226.7   | 1.9 | 0.9 to 3.3  |
| Kiribati         | Both   | 1 to 4   | 1.1  | 0.8 to 1.4  | 458.5 | 212.8 to 832.0  | 5.4 | 2.5 to 9.9  |
| Kiribati         | Both   | 5 to 9   | 3.3  | 2.6 to 4.1  | 226.8 | 145.3 to 342.6  | 2.9 | 1.8 to 4.3  |
| Kiribati         | Both   | 10 to 14 | 6.5  | 5.1 to 8.2  | 224.9 | 149.7 to 320.4  | 3   | 2.0 to 4.3  |
| Kiribati         | Both   | 15 to 19 | 10.5 | 8.0 to 13.5 | 451.8 | 295.6 to 683.7  | 6.5 | 4.2 to 9.9  |
| Marshall Islands | Male   | 1 to 4   | 1.5  | 1.0 to 2.1  | 208.8 | 66.3 to 483.2   | 2.5 | 0.8 to 5.7  |
| Marshall Islands | Male   | 5 to 9   | 4.3  | 3.0 to 5.8  | 164.5 | 71.4 to 329.2   | 2.1 | 0.9 to 4.1  |
| Marshall Islands | Male   | 10 to 14 | 8.3  | 5.9 to 11.4 | 109.4 | 57.6 to 181.9   | 1.5 | 0.8 to 2.4  |
| Marshall Islands | Male   | 15 to 19 | 13.3 | 9.2 to 19.0 | 375.3 | 213.6 to 607.4  | 5.4 | 3.1 to 8.8  |

|                                |        |          |      |             |       |                |     |            |
|--------------------------------|--------|----------|------|-------------|-------|----------------|-----|------------|
| Marshall Islands               | Female | 1 to 4   | 0.8  | 0.5 to 1.1  | 131.8 | 35.3 to 329.6  | 1.6 | 0.4 to 3.9 |
| Marshall Islands               | Female | 5 to 9   | 2.4  | 1.6 to 3.4  | 93.7  | 33.8 to 197.5  | 1.2 | 0.4 to 2.5 |
| Marshall Islands               | Female | 10 to 14 | 5    | 3.3 to 6.9  | 175.4 | 66.0 to 342.3  | 2.4 | 0.9 to 4.6 |
| Marshall Islands               | Female | 15 to 19 | 8.2  | 5.5 to 11.4 | 110   | 46.5 to 200.0  | 1.6 | 0.7 to 2.9 |
| Marshall Islands               | Both   | 1 to 4   | 1.1  | 0.8 to 1.5  | 171.1 | 68.9 to 356.4  | 2   | 0.8 to 4.2 |
| Marshall Islands               | Both   | 5 to 9   | 3.4  | 2.5 to 4.2  | 130.4 | 67.7 to 230.1  | 1.6 | 0.8 to 2.9 |
| Marshall Islands               | Both   | 10 to 14 | 6.7  | 5.0 to 8.6  | 141.2 | 75.4 to 224.5  | 1.9 | 1.0 to 3.0 |
| Marshall Islands               | Both   | 15 to 19 | 10.9 | 8.1 to 14.1 | 246.9 | 160.7 to 379.6 | 3.5 | 2.3 to 5.5 |
| Federated States of Micronesia | Male   | 1 to 4   | 1.4  | 0.9 to 1.9  | 61.7  | 16.0 to 146.1  | 0.7 | 0.2 to 1.7 |
| Federated States of Micronesia | Male   | 5 to 9   | 4    | 2.7 to 5.5  | 82.7  | 27.8 to 169.5  | 1   | 0.3 to 2.1 |
| Federated States of Micronesia | Male   | 10 to 14 | 8    | 5.6 to 10.9 | 63.1  | 32.8 to 111.0  | 0.8 | 0.4 to 1.5 |
| Federated States of Micronesia | Male   | 15 to 19 | 12.9 | 8.7 to 17.6 | 324.8 | 173.5 to 577.7 | 4.7 | 2.5 to 8.3 |
| Federated States of Micronesia | Female | 1 to 4   | 0.8  | 0.5 to 1.2  | 38.5  | 7.4 to 106.3   | 0.5 | 0.1 to 1.3 |
| Federated States of Micronesia | Female | 5 to 9   | 2.4  | 1.6 to 3.3  | 42.6  | 9.9 to 87.2    | 0.5 | 0.1 to 1.1 |
| Federated States of Micronesia | Female | 10 to 14 | 4.9  | 3.3 to 6.6  | 118.2 | 45.2 to 228.2  | 1.6 | 0.6 to 3.1 |
| Federated States of Micronesia | Female | 15 to 19 | 8.1  | 5.4 to 11.2 | 91.8  | 38.4 to 179.6  | 1.3 | 0.5 to 2.6 |
| Federated States of Micronesia | Both   | 1 to 4   | 1.1  | 0.8 to 1.4  | 50.5  | 17.7 to 114.3  | 0.6 | 0.2 to 1.4 |
| Federated States of Micronesia | Both   | 5 to 9   | 3.3  | 2.5 to 4.1  | 63.4  | 29.4 to 114.5  | 0.8 | 0.4 to 1.4 |
| Federated States of Micronesia | Both   | 10 to 14 | 6.5  | 5.0 to 8.2  | 89.8  | 46.7 to 154.2  | 1.2 | 0.6 to 2.1 |
| Federated States of Micronesia | Both   | 15 to 19 | 10.6 | 8.1 to 13.6 | 211.6 | 129.5 to 357.6 | 3   | 1.8 to 5.2 |
| Papua New Guinea               | Male   | 1 to 4   | 1.3  | 0.9 to 2.0  | 103.5 | 30.5 to 257.5  | 1.2 | 0.4 to 3.0 |
| Papua New Guinea               | Male   | 5 to 9   | 3.9  | 2.7 to 5.5  | 66    | 28.2 to 134.3  | 0.8 | 0.3 to 1.7 |
| Papua New Guinea               | Male   | 10 to 14 | 7.8  | 5.4 to 10.5 | 36.4  | 17.4 to 62.8   | 0.5 | 0.2 to 0.8 |
| Papua New Guinea               | Male   | 15 to 19 | 12.6 | 8.4 to 17.1 | 155.9 | 80.5 to 286.0  | 2.2 | 1.1 to 4.1 |
| Papua New Guinea               | Female | 1 to 4   | 0.7  | 0.4 to 1.1  | 41.5  | 12.1 to 100.4  | 0.5 | 0.1 to 1.2 |
| Papua New Guinea               | Female | 5 to 9   | 2.4  | 1.5 to 3.3  | 26.6  | 10.3 to 60.4   | 0.3 | 0.1 to 0.8 |
| Papua New Guinea               | Female | 10 to 14 | 4.9  | 3.3 to 6.7  | 51.8  | 22.5 to 103.8  | 0.7 | 0.3 to 1.4 |
| Papua New Guinea               | Female | 15 to 19 | 8    | 5.4 to 11.0 | 22.3  | 10.6 to 44.4   | 0.3 | 0.1 to 0.6 |
| Papua New Guinea               | Both   | 1 to 4   | 1    | 0.8 to 1.5  | 73.6  | 25.7 to 174.5  | 0.9 | 0.3 to 2.1 |
| Papua New Guinea               | Both   | 5 to 9   | 3.2  | 2.4 to 4.2  | 47    | 23.7 to 86.1   | 0.6 | 0.3 to 1.1 |
| Papua New Guinea               | Both   | 10 to 14 | 6.4  | 4.9 to 8.0  | 43.8  | 24.8 to 73.8   | 0.6 | 0.3 to 1.0 |
| Papua New Guinea               | Both   | 15 to 19 | 10.4 | 7.8 to 13.1 | 91.2  | 50.3 to 165.4  | 1.3 | 0.7 to 2.4 |
| Samoa                          | Male   | 1 to 4   | 1.3  | 0.9 to 1.9  | 45.4  | 7.3 to 135.6   | 0.5 | 0.1 to 1.6 |

|                 |        |          |      |             |       |                |     |            |
|-----------------|--------|----------|------|-------------|-------|----------------|-----|------------|
| Samoa           | Male   | 5 to 9   | 4    | 2.9 to 5.5  | 48.7  | 12.7 to 106.3  | 0.6 | 0.2 to 1.3 |
| Samoa           | Male   | 10 to 14 | 8    | 5.5 to 10.7 | 46.5  | 22.1 to 85.2   | 0.6 | 0.3 to 1.1 |
| Samoa           | Male   | 15 to 19 | 12.8 | 8.3 to 17.5 | 245.6 | 129.8 to 411.1 | 3.5 | 1.8 to 5.9 |
| Samoa           | Female | 1 to 4   | 0.7  | 0.4 to 1.1  | 20.9  | 3.0 to 68.7    | 0.2 | 0.0 to 0.8 |
| Samoa           | Female | 5 to 9   | 2.4  | 1.5 to 3.3  | 29.5  | 6.5 to 70.4    | 0.4 | 0.1 to 0.9 |
| Samoa           | Female | 10 to 14 | 4.9  | 3.3 to 6.6  | 75.7  | 30.9 to 139.6  | 1   | 0.4 to 1.9 |
| Samoa           | Female | 15 to 19 | 8.1  | 5.2 to 11.0 | 60.1  | 27.6 to 109.3  | 0.8 | 0.4 to 1.6 |
| Samoa           | Both   | 1 to 4   | 1.1  | 0.8 to 1.4  | 33.6  | 6.4 to 94.3    | 0.4 | 0.1 to 1.1 |
| Samoa           | Both   | 5 to 9   | 3.2  | 2.5 to 4.1  | 39.4  | 13.8 to 76.4   | 0.5 | 0.2 to 1.0 |
| Samoa           | Both   | 10 to 14 | 6.5  | 5.0 to 8.1  | 60.6  | 32.4 to 95.9   | 0.8 | 0.4 to 1.3 |
| Samoa           | Both   | 15 to 19 | 10.6 | 7.9 to 13.6 | 157.8 | 91.5 to 247.3  | 2.3 | 1.3 to 3.6 |
| Solomon Islands | Male   | 1 to 4   | 1.4  | 0.9 to 1.9  | 78.2  | 15.4 to 191.0  | 0.9 | 0.2 to 2.3 |
| Solomon Islands | Male   | 5 to 9   | 4    | 2.8 to 5.4  | 99.4  | 33.1 to 205.4  | 1.2 | 0.4 to 2.6 |
| Solomon Islands | Male   | 10 to 14 | 8    | 5.7 to 10.8 | 77.2  | 39.0 to 137.2  | 1   | 0.5 to 1.8 |
| Solomon Islands | Male   | 15 to 19 | 13   | 8.7 to 17.9 | 362.7 | 196.9 to 631.7 | 5.2 | 2.8 to 9.1 |
| Solomon Islands | Female | 1 to 4   | 0.8  | 0.5 to 1.1  | 44.1  | 8.8 to 117.7   | 0.5 | 0.1 to 1.4 |
| Solomon Islands | Female | 5 to 9   | 2.5  | 1.7 to 3.4  | 56.1  | 14.5 to 122.6  | 0.7 | 0.2 to 1.5 |
| Solomon Islands | Female | 10 to 14 | 5    | 3.7 to 6.8  | 179.6 | 74.3 to 353.1  | 2.4 | 1.0 to 4.8 |
| Solomon Islands | Female | 15 to 19 | 8.2  | 5.8 to 11.4 | 122.8 | 52.8 to 242.5  | 1.8 | 0.7 to 3.5 |
| Solomon Islands | Both   | 1 to 4   | 1.1  | 0.8 to 1.4  | 61.7  | 16.1 to 138.0  | 0.7 | 0.2 to 1.6 |
| Solomon Islands | Both   | 5 to 9   | 3.3  | 2.5 to 4.1  | 78.4  | 35.6 to 140.6  | 1   | 0.4 to 1.8 |
| Solomon Islands | Both   | 10 to 14 | 6.5  | 5.0 to 8.2  | 126.8 | 63.6 to 223.8  | 1.7 | 0.8 to 3.0 |
| Solomon Islands | Both   | 15 to 19 | 10.7 | 8.0 to 13.5 | 247   | 141.8 to 402.0 | 3.5 | 2.0 to 5.8 |
| Tonga           | Male   | 1 to 4   | 1.3  | 0.9 to 1.9  | 94.1  | 26.7 to 235.0  | 1.1 | 0.3 to 2.8 |
| Tonga           | Male   | 5 to 9   | 4    | 2.7 to 5.4  | 67.1  | 25.3 to 146.3  | 0.8 | 0.3 to 1.8 |
| Tonga           | Male   | 10 to 14 | 8.1  | 5.7 to 10.7 | 38.5  | 20.0 to 66.3   | 0.5 | 0.3 to 0.9 |
| Tonga           | Male   | 15 to 19 | 13.1 | 8.9 to 17.7 | 177.3 | 101.3 to 293.5 | 2.5 | 1.4 to 4.2 |
| Tonga           | Female | 1 to 4   | 0.8  | 0.5 to 1.1  | 76.6  | 22.3 to 175.1  | 0.9 | 0.3 to 2.1 |
| Tonga           | Female | 5 to 9   | 2.4  | 1.6 to 3.3  | 57.2  | 22.7 to 106.9  | 0.7 | 0.3 to 1.3 |
| Tonga           | Female | 10 to 14 | 5    | 3.2 to 6.6  | 87.4  | 39.5 to 155.8  | 1.2 | 0.5 to 2.1 |
| Tonga           | Female | 15 to 19 | 8.1  | 5.0 to 11.1 | 46.5  | 23.7 to 83.7   | 0.7 | 0.3 to 1.2 |
| Tonga           | Both   | 1 to 4   | 1.1  | 0.8 to 1.4  | 85.6  | 30.2 to 188.3  | 1   | 0.4 to 2.2 |
| Tonga           | Both   | 5 to 9   | 3.3  | 2.4 to 4.1  | 62.3  | 30.7 to 106.7  | 0.8 | 0.4 to 1.3 |

|            |        |          |      |             |       |                |     |            |
|------------|--------|----------|------|-------------|-------|----------------|-----|------------|
| Tonga      | Both   | 10 to 14 | 6.6  | 5.0 to 8.3  | 61.7  | 35.4 to 100.2  | 0.8 | 0.5 to 1.3 |
| Tonga      | Both   | 15 to 19 | 10.7 | 8.1 to 13.6 | 114.4 | 72.1 to 172.7  | 1.6 | 1.0 to 2.5 |
| Vanuatu    | Male   | 1 to 4   | 1.3  | 0.8 to 1.9  | 183.5 | 49.0 to 437.2  | 2.2 | 0.6 to 5.2 |
| Vanuatu    | Male   | 5 to 9   | 4    | 2.7 to 5.7  | 150.4 | 61.1 to 304.9  | 1.9 | 0.8 to 3.8 |
| Vanuatu    | Male   | 10 to 14 | 8    | 5.5 to 10.9 | 105.5 | 56.5 to 175.0  | 1.4 | 0.7 to 2.3 |
| Vanuatu    | Male   | 15 to 19 | 12.8 | 8.8 to 17.5 | 383.2 | 212.0 to 657.3 | 5.5 | 3.0 to 9.5 |
| Vanuatu    | Female | 1 to 4   | 0.8  | 0.5 to 1.1  | 110.5 | 25.2 to 274.4  | 1.3 | 0.3 to 3.2 |
| Vanuatu    | Female | 5 to 9   | 2.4  | 1.6 to 3.3  | 100   | 26.3 to 207.8  | 1.3 | 0.3 to 2.6 |
| Vanuatu    | Female | 10 to 14 | 5    | 3.5 to 6.8  | 183.2 | 76.8 to 353.7  | 2.5 | 1.0 to 4.8 |
| Vanuatu    | Female | 15 to 19 | 8.2  | 5.5 to 11.5 | 115.5 | 49.2 to 231.4  | 1.6 | 0.7 to 3.3 |
| Vanuatu    | Both   | 1 to 4   | 1.1  | 0.8 to 1.4  | 148.2 | 50.8 to 307.6  | 1.8 | 0.6 to 3.6 |
| Vanuatu    | Both   | 5 to 9   | 3.2  | 2.5 to 4.1  | 126.2 | 64.0 to 213.0  | 1.6 | 0.8 to 2.7 |
| Vanuatu    | Both   | 10 to 14 | 6.5  | 5.1 to 8.3  | 142.5 | 77.0 to 237.5  | 1.9 | 1.0 to 3.2 |
| Vanuatu    | Both   | 15 to 19 | 10.6 | 8.0 to 13.3 | 254   | 151.6 to 422.4 | 3.6 | 2.2 to 6.1 |
| Armenia    | Male   | 1 to 4   | 0.7  | 0.4 to 1.0  | 11.3  | 5.7 to 20.5    | 0.1 | 0.1 to 0.2 |
| Armenia    | Male   | 5 to 9   | 2.2  | 1.4 to 3.0  | 6.1   | 3.5 to 9.4     | 0.1 | 0.0 to 0.1 |
| Armenia    | Male   | 10 to 14 | 4.3  | 2.9 to 5.8  | 2.7   | 0.8 to 4.9     | 0   | 0.0 to 0.1 |
| Armenia    | Male   | 15 to 19 | 6.7  | 4.4 to 9.4  | 26.4  | 10.3 to 57.0   | 0.4 | 0.1 to 0.8 |
| Armenia    | Female | 1 to 4   | 0.5  | 0.3 to 0.7  | 7.4   | 3.8 to 13.2    | 0.1 | 0.0 to 0.2 |
| Armenia    | Female | 5 to 9   | 1.4  | 0.8 to 2.0  | 11.6  | 5.7 to 22.8    | 0.1 | 0.1 to 0.3 |
| Armenia    | Female | 10 to 14 | 2.7  | 1.7 to 3.8  | 8.7   | 4.2 to 13.5    | 0.1 | 0.1 to 0.2 |
| Armenia    | Female | 15 to 19 | 4.1  | 2.4 to 6.2  | 25.7  | 13.9 to 48.0   | 0.4 | 0.2 to 0.7 |
| Armenia    | Both   | 1 to 4   | 0.6  | 0.4 to 0.8  | 9.5   | 5.6 to 15.1    | 0.1 | 0.1 to 0.2 |
| Armenia    | Both   | 5 to 9   | 1.8  | 1.3 to 2.3  | 8.4   | 5.4 to 13.2    | 0.1 | 0.1 to 0.2 |
| Armenia    | Both   | 10 to 14 | 3.6  | 2.7 to 4.6  | 5.2   | 2.4 to 8.0     | 0.1 | 0.0 to 0.1 |
| Armenia    | Both   | 15 to 19 | 5.6  | 4.0 to 7.3  | 26.1  | 13.5 to 50.0   | 0.4 | 0.2 to 0.7 |
| Azerbaijan | Male   | 1 to 4   | 0.7  | 0.4 to 1.0  | 11.8  | 5.0 to 24.2    | 0.1 | 0.1 to 0.3 |
| Azerbaijan | Male   | 5 to 9   | 2.2  | 1.3 to 3.1  | 40    | 24.0 to 60.1   | 0.5 | 0.3 to 0.8 |
| Azerbaijan | Male   | 10 to 14 | 4.5  | 3.1 to 6.4  | 44.5  | 27.3 to 69.5   | 0.6 | 0.4 to 0.9 |
| Azerbaijan | Male   | 15 to 19 | 7    | 4.7 to 10.1 | 113.9 | 65.8 to 175.4  | 1.6 | 0.9 to 2.5 |
| Azerbaijan | Female | 1 to 4   | 0.5  | 0.2 to 0.7  | 7.4   | 2.0 to 14.4    | 0.1 | 0.0 to 0.2 |
| Azerbaijan | Female | 5 to 9   | 1.4  | 0.8 to 2.0  | 42.6  | 24.3 to 61.5   | 0.5 | 0.3 to 0.8 |
| Azerbaijan | Female | 10 to 14 | 2.7  | 1.7 to 3.8  | 46.1  | 29.1 to 68.0   | 0.6 | 0.4 to 0.9 |

|            |        |          |     |            |       |                |     |            |
|------------|--------|----------|-----|------------|-------|----------------|-----|------------|
| Azerbaijan | Female | 15 to 19 | 4.2 | 2.5 to 5.8 | 64    | 36.1 to 94.1   | 0.9 | 0.5 to 1.3 |
| Azerbaijan | Both   | 1 to 4   | 0.6 | 0.4 to 0.8 | 9.8   | 5.4 to 16.5    | 0.1 | 0.1 to 0.2 |
| Azerbaijan | Both   | 5 to 9   | 1.8 | 1.3 to 2.4 | 41.2  | 29.2 to 55.4   | 0.5 | 0.4 to 0.7 |
| Azerbaijan | Both   | 10 to 14 | 3.7 | 2.9 to 4.6 | 45.3  | 32.3 to 61.5   | 0.6 | 0.4 to 0.8 |
| Azerbaijan | Both   | 15 to 19 | 5.7 | 4.2 to 7.3 | 90.1  | 61.7 to 123.3  | 1.3 | 0.9 to 1.8 |
| Georgia    | Male   | 1 to 4   | 0.7 | 0.4 to 1.1 | 42.5  | 22.2 to 75.2   | 0.5 | 0.3 to 0.9 |
| Georgia    | Male   | 5 to 9   | 2.2 | 1.5 to 3.2 | 10.6  | 4.3 to 19.4    | 0.1 | 0.0 to 0.2 |
| Georgia    | Male   | 10 to 14 | 4.4 | 3.0 to 6.2 | 40.4  | 22.6 to 66.3   | 0.5 | 0.3 to 0.9 |
| Georgia    | Male   | 15 to 19 | 6.8 | 4.3 to 9.8 | 180.1 | 112.4 to 274.3 | 2.6 | 1.6 to 4.0 |
| Georgia    | Female | 1 to 4   | 0.5 | 0.3 to 0.8 | 30.3  | 17.2 to 51.9   | 0.4 | 0.2 to 0.6 |
| Georgia    | Female | 5 to 9   | 1.5 | 0.9 to 2.2 | 25.7  | 7.9 to 42.7    | 0.3 | 0.1 to 0.5 |
| Georgia    | Female | 10 to 14 | 2.8 | 1.8 to 4.0 | 53.7  | 31.7 to 76.6   | 0.7 | 0.4 to 1.0 |
| Georgia    | Female | 15 to 19 | 4.3 | 2.7 to 6.4 | 135.8 | 86.3 to 184.0  | 2   | 1.2 to 2.6 |
| Georgia    | Both   | 1 to 4   | 0.6 | 0.4 to 0.9 | 36.7  | 21.9 to 58.4   | 0.4 | 0.3 to 0.7 |
| Georgia    | Both   | 5 to 9   | 1.9 | 1.4 to 2.5 | 17.7  | 7.1 to 27.6    | 0.2 | 0.1 to 0.3 |
| Georgia    | Both   | 10 to 14 | 3.7 | 2.8 to 4.7 | 46.6  | 33.2 to 63.3   | 0.6 | 0.4 to 0.8 |
| Georgia    | Both   | 15 to 19 | 5.6 | 4.0 to 7.2 | 158.6 | 115.8 to 207.1 | 2.3 | 1.7 to 3.0 |
| Kazakhstan | Male   | 1 to 4   | 0.7 | 0.4 to 1.0 | 18.5  | 10.3 to 30.5   | 0.2 | 0.1 to 0.4 |
| Kazakhstan | Male   | 5 to 9   | 2.2 | 1.3 to 3.1 | 23.5  | 15.9 to 34.4   | 0.3 | 0.2 to 0.4 |
| Kazakhstan | Male   | 10 to 14 | 4.3 | 2.7 to 5.9 | 18.9  | 12.0 to 28.8   | 0.2 | 0.2 to 0.4 |
| Kazakhstan | Male   | 15 to 19 | 6.6 | 4.1 to 9.3 | 99    | 61.0 to 148.1  | 1.4 | 0.9 to 2.1 |
| Kazakhstan | Female | 1 to 4   | 0.5 | 0.3 to 0.7 | 20    | 9.7 to 32.5    | 0.2 | 0.1 to 0.4 |
| Kazakhstan | Female | 5 to 9   | 1.4 | 0.9 to 2.2 | 17.1  | 9.5 to 25.1    | 0.2 | 0.1 to 0.3 |
| Kazakhstan | Female | 10 to 14 | 2.6 | 1.7 to 4.0 | 21.6  | 10.5 to 32.2   | 0.3 | 0.1 to 0.4 |
| Kazakhstan | Female | 15 to 19 | 4   | 2.5 to 6.2 | 49.8  | 31.8 to 75.7   | 0.7 | 0.4 to 1.1 |
| Kazakhstan | Both   | 1 to 4   | 0.6 | 0.4 to 0.8 | 19.2  | 12.2 to 28.7   | 0.2 | 0.1 to 0.3 |
| Kazakhstan | Both   | 5 to 9   | 1.8 | 1.3 to 2.4 | 20.4  | 14.9 to 26.8   | 0.3 | 0.2 to 0.3 |
| Kazakhstan | Both   | 10 to 14 | 3.5 | 2.6 to 4.6 | 20.3  | 14.0 to 26.9   | 0.3 | 0.2 to 0.4 |
| Kazakhstan | Both   | 15 to 19 | 5.3 | 3.8 to 7.0 | 74.9  | 53.3 to 101.9  | 1.1 | 0.8 to 1.5 |
| Kyrgyzstan | Male   | 1 to 4   | 0.7 | 0.4 to 1.0 | 4     | 2.0 to 6.8     | 0   | 0.0 to 0.1 |
| Kyrgyzstan | Male   | 5 to 9   | 2.2 | 1.4 to 3.0 | 5.9   | 3.7 to 8.9     | 0.1 | 0.0 to 0.1 |
| Kyrgyzstan | Male   | 10 to 14 | 4.4 | 2.9 to 5.9 | 11.8  | 6.6 to 19.0    | 0.1 | 0.1 to 0.2 |
| Kyrgyzstan | Male   | 15 to 19 | 7   | 4.5 to 9.6 | 58.8  | 34.6 to 88.6   | 0.8 | 0.5 to 1.3 |

|              |        |          |     |             |       |               |     |            |
|--------------|--------|----------|-----|-------------|-------|---------------|-----|------------|
| Kyrgyzstan   | Female | 1 to 4   | 0.5 | 0.3 to 0.7  | 4.6   | 1.9 to 7.6    | 0.1 | 0.0 to 0.1 |
| Kyrgyzstan   | Female | 5 to 9   | 1.4 | 0.9 to 1.9  | 10.1  | 5.1 to 14.5   | 0.1 | 0.1 to 0.2 |
| Kyrgyzstan   | Female | 10 to 14 | 2.6 | 1.7 to 3.7  | 22.1  | 14.0 to 34.6  | 0.3 | 0.2 to 0.5 |
| Kyrgyzstan   | Female | 15 to 19 | 4   | 2.5 to 5.9  | 53.6  | 33.6 to 77.4  | 0.8 | 0.5 to 1.1 |
| Kyrgyzstan   | Both   | 1 to 4   | 0.6 | 0.4 to 0.8  | 4.2   | 2.4 to 6.6    | 0   | 0.0 to 0.1 |
| Kyrgyzstan   | Both   | 5 to 9   | 1.8 | 1.3 to 2.2  | 8     | 5.2 to 10.6   | 0.1 | 0.1 to 0.1 |
| Kyrgyzstan   | Both   | 10 to 14 | 3.5 | 2.6 to 4.4  | 16.9  | 11.6 to 22.8  | 0.2 | 0.1 to 0.3 |
| Kyrgyzstan   | Both   | 15 to 19 | 5.5 | 3.9 to 7.1  | 56.2  | 39.7 to 74.2  | 0.8 | 0.6 to 1.1 |
| Mongolia     | Male   | 1 to 4   | 0.7 | 0.5 to 1.0  | 100.6 | 45.5 to 200.0 | 1.2 | 0.5 to 2.4 |
| Mongolia     | Male   | 5 to 9   | 2.3 | 1.5 to 3.2  | 120.5 | 62.9 to 205.4 | 1.5 | 0.8 to 2.6 |
| Mongolia     | Male   | 10 to 14 | 4.6 | 3.1 to 6.3  | 64.5  | 34.9 to 106.3 | 0.9 | 0.5 to 1.4 |
| Mongolia     | Male   | 15 to 19 | 7.3 | 4.6 to 10.4 | 169.2 | 94.6 to 296.1 | 2.4 | 1.4 to 4.3 |
| Mongolia     | Female | 1 to 4   | 0.5 | 0.3 to 0.8  | 97.5  | 35.8 to 196.0 | 1.2 | 0.4 to 2.3 |
| Mongolia     | Female | 5 to 9   | 1.5 | 0.8 to 2.2  | 89.6  | 50.5 to 147.7 | 1.1 | 0.6 to 1.9 |
| Mongolia     | Female | 10 to 14 | 2.7 | 1.7 to 4.1  | 117.2 | 66.4 to 193.2 | 1.6 | 0.9 to 2.6 |
| Mongolia     | Female | 15 to 19 | 4.1 | 2.5 to 6.2  | 134.4 | 59.6 to 221.5 | 1.9 | 0.9 to 3.2 |
| Mongolia     | Both   | 1 to 4   | 0.6 | 0.4 to 0.8  | 99    | 50.5 to 171.3 | 1.2 | 0.6 to 2.0 |
| Mongolia     | Both   | 5 to 9   | 1.9 | 1.4 to 2.4  | 105.2 | 68.2 to 156.4 | 1.3 | 0.9 to 2.0 |
| Mongolia     | Both   | 10 to 14 | 3.7 | 2.8 to 4.8  | 90.6  | 60.1 to 133.8 | 1.2 | 0.8 to 1.8 |
| Mongolia     | Both   | 15 to 19 | 5.7 | 4.2 to 7.4  | 152   | 93.3 to 217.8 | 2.2 | 1.3 to 3.1 |
| Tajikistan   | Male   | 1 to 4   | 0.7 | 0.5 to 1.0  | 10.8  | 4.5 to 20.8   | 0.1 | 0.1 to 0.2 |
| Tajikistan   | Male   | 5 to 9   | 2.2 | 1.4 to 3.0  | 9     | 5.0 to 15.3   | 0.1 | 0.1 to 0.2 |
| Tajikistan   | Male   | 10 to 14 | 4.4 | 2.9 to 6.1  | 12.4  | 7.0 to 20.6   | 0.2 | 0.1 to 0.3 |
| Tajikistan   | Male   | 15 to 19 | 7.1 | 4.5 to 10.2 | 37.6  | 20.6 to 63.6  | 0.5 | 0.3 to 0.9 |
| Tajikistan   | Female | 1 to 4   | 0.5 | 0.3 to 0.7  | 8     | 2.6 to 15.6   | 0.1 | 0.0 to 0.2 |
| Tajikistan   | Female | 5 to 9   | 1.4 | 0.9 to 2.1  | 11.5  | 6.4 to 21.7   | 0.1 | 0.1 to 0.3 |
| Tajikistan   | Female | 10 to 14 | 2.7 | 1.7 to 4.0  | 12.6  | 7.0 to 19.9   | 0.2 | 0.1 to 0.3 |
| Tajikistan   | Female | 15 to 19 | 4.2 | 2.4 to 6.3  | 34    | 17.8 to 53.7  | 0.5 | 0.2 to 0.8 |
| Tajikistan   | Both   | 1 to 4   | 0.6 | 0.4 to 0.8  | 9.4   | 5.5 to 16.1   | 0.1 | 0.1 to 0.2 |
| Tajikistan   | Both   | 5 to 9   | 1.8 | 1.3 to 2.4  | 10.3  | 6.9 to 16.1   | 0.1 | 0.1 to 0.2 |
| Tajikistan   | Both   | 10 to 14 | 3.6 | 2.7 to 4.8  | 12.5  | 8.5 to 18.1   | 0.2 | 0.1 to 0.2 |
| Tajikistan   | Both   | 15 to 19 | 5.7 | 4.1 to 7.5  | 35.9  | 23.1 to 51.4  | 0.5 | 0.3 to 0.7 |
| Turkmenistan | Male   | 1 to 4   | 0.7 | 0.5 to 1.0  | 92.3  | 46.2 to 166.0 | 1.1 | 0.5 to 2.0 |

|              |        |          |     |             |       |                |     |            |
|--------------|--------|----------|-----|-------------|-------|----------------|-----|------------|
| Turkmenistan | Male   | 5 to 9   | 2.3 | 1.5 to 3.1  | 63.4  | 39.2 to 98.1   | 0.8 | 0.5 to 1.2 |
| Turkmenistan | Male   | 10 to 14 | 4.5 | 2.9 to 6.2  | 61.3  | 35.7 to 93.4   | 0.8 | 0.5 to 1.2 |
| Turkmenistan | Male   | 15 to 19 | 6.9 | 4.4 to 9.9  | 208.7 | 122.9 to 341.4 | 3   | 1.8 to 4.9 |
| Turkmenistan | Female | 1 to 4   | 0.5 | 0.3 to 0.8  | 97.1  | 47.7 to 169.1  | 1.1 | 0.6 to 2.0 |
| Turkmenistan | Female | 5 to 9   | 1.5 | 0.9 to 2.1  | 60.3  | 31.0 to 91.4   | 0.8 | 0.4 to 1.1 |
| Turkmenistan | Female | 10 to 14 | 2.9 | 1.9 to 4.0  | 54.7  | 34.8 to 94.0   | 0.7 | 0.5 to 1.3 |
| Turkmenistan | Female | 15 to 19 | 4.5 | 2.8 to 6.3  | 124.7 | 70.8 to 198.8  | 1.8 | 1.0 to 2.9 |
| Turkmenistan | Both   | 1 to 4   | 0.6 | 0.4 to 0.8  | 94.7  | 56.4 to 157.5  | 1.1 | 0.7 to 1.9 |
| Turkmenistan | Both   | 5 to 9   | 1.9 | 1.4 to 2.4  | 61.8  | 43.2 to 84.6   | 0.8 | 0.5 to 1.1 |
| Turkmenistan | Both   | 10 to 14 | 3.7 | 2.8 to 4.7  | 58    | 40.3 to 83.1   | 0.8 | 0.5 to 1.1 |
| Turkmenistan | Both   | 15 to 19 | 5.7 | 4.2 to 7.5  | 167.2 | 112.4 to 235.8 | 2.4 | 1.6 to 3.4 |
| Uzbekistan   | Male   | 1 to 4   | 0.7 | 0.4 to 1.1  | 7.9   | 4.1 to 13.6    | 0.1 | 0.0 to 0.2 |
| Uzbekistan   | Male   | 5 to 9   | 2.3 | 1.4 to 3.1  | 7.1   | 4.0 to 11.3    | 0.1 | 0.0 to 0.1 |
| Uzbekistan   | Male   | 10 to 14 | 4.6 | 3.0 to 6.2  | 6.8   | 3.9 to 11.2    | 0.1 | 0.0 to 0.1 |
| Uzbekistan   | Male   | 15 to 19 | 7.2 | 4.4 to 10.3 | 36.1  | 17.2 to 65.6   | 0.5 | 0.2 to 0.9 |
| Uzbekistan   | Female | 1 to 4   | 0.5 | 0.3 to 0.8  | 4.3   | 2.3 to 7.6     | 0.1 | 0.0 to 0.1 |
| Uzbekistan   | Female | 5 to 9   | 1.5 | 0.8 to 2.1  | 5.9   | 3.3 to 10.5    | 0.1 | 0.0 to 0.1 |
| Uzbekistan   | Female | 10 to 14 | 2.7 | 1.6 to 4.1  | 6.4   | 3.8 to 11.6    | 0.1 | 0.0 to 0.1 |
| Uzbekistan   | Female | 15 to 19 | 4.1 | 2.3 to 6.3  | 15.3  | 7.5 to 32.5    | 0.2 | 0.1 to 0.5 |
| Uzbekistan   | Both   | 1 to 4   | 0.6 | 0.4 to 0.8  | 6.2   | 3.7 to 9.7     | 0.1 | 0.0 to 0.1 |
| Uzbekistan   | Both   | 5 to 9   | 1.9 | 1.3 to 2.4  | 6.5   | 4.2 to 9.6     | 0.1 | 0.0 to 0.1 |
| Uzbekistan   | Both   | 10 to 14 | 3.7 | 2.7 to 4.7  | 6.6   | 4.4 to 9.6     | 0.1 | 0.1 to 0.1 |
| Uzbekistan   | Both   | 15 to 19 | 5.7 | 4.2 to 7.4  | 25.9  | 15.2 to 41.2   | 0.4 | 0.2 to 0.6 |
| Albania      | Male   | 1 to 4   | 0.7 | 0.4 to 1.3  | 276.7 | 119.9 to 589.4 | 3.3 | 1.4 to 7.0 |
| Albania      | Male   | 5 to 9   | 2.2 | 1.1 to 3.5  | 111.3 | 54.3 to 196.8  | 1.4 | 0.7 to 2.5 |
| Albania      | Male   | 10 to 14 | 4.4 | 2.5 to 6.6  | 108.4 | 58.8 to 175.6  | 1.5 | 0.8 to 2.4 |
| Albania      | Male   | 15 to 19 | 6.9 | 3.8 to 10.9 | 186.5 | 113.6 to 282.6 | 2.7 | 1.6 to 4.1 |
| Albania      | Female | 1 to 4   | 0.5 | 0.2 to 0.9  | 296.1 | 119.5 to 610.4 | 3.5 | 1.4 to 7.2 |
| Albania      | Female | 5 to 9   | 1.7 | 0.8 to 2.8  | 117   | 57.9 to 216.9  | 1.5 | 0.7 to 2.7 |
| Albania      | Female | 10 to 14 | 3.4 | 1.9 to 5.2  | 100.3 | 46.2 to 163.2  | 1.3 | 0.6 to 2.2 |
| Albania      | Female | 15 to 19 | 5.3 | 2.9 to 8.3  | 109.5 | 66.9 to 167.2  | 1.6 | 1.0 to 2.4 |
| Albania      | Both   | 1 to 4   | 0.6 | 0.3 to 0.9  | 286.1 | 130.2 to 569.3 | 3.4 | 1.5 to 6.7 |
| Albania      | Both   | 5 to 9   | 2   | 1.2 to 2.8  | 114   | 58.2 to 198.7  | 1.4 | 0.7 to 2.5 |

|                        |        |          |     |             |       |                |     |            |
|------------------------|--------|----------|-----|-------------|-------|----------------|-----|------------|
| Albania                | Both   | 10 to 14 | 3.9 | 2.7 to 5.3  | 104.5 | 55.9 to 161.4  | 1.4 | 0.7 to 2.2 |
| Albania                | Both   | 15 to 19 | 6.1 | 4.2 to 8.5  | 148.6 | 102.4 to 208.2 | 2.1 | 1.5 to 3.0 |
| Bosnia and Herzegovina | Male   | 1 to 4   | 0.7 | 0.3 to 1.2  | 21.9  | 9.4 to 43.3    | 0.3 | 0.1 to 0.5 |
| Bosnia and Herzegovina | Male   | 5 to 9   | 2.1 | 0.8 to 3.6  | 21.6  | 10.4 to 39.2   | 0.3 | 0.1 to 0.5 |
| Bosnia and Herzegovina | Male   | 10 to 14 | 4   | 2.3 to 6.3  | 30.2  | 16.2 to 51.5   | 0.4 | 0.2 to 0.7 |
| Bosnia and Herzegovina | Male   | 15 to 19 | 6.1 | 3.3 to 9.5  | 90.7  | 43.6 to 142.1  | 1.3 | 0.6 to 2.0 |
| Bosnia and Herzegovina | Female | 1 to 4   | 0.5 | 0.3 to 0.9  | 16.3  | 7.2 to 32.4    | 0.2 | 0.1 to 0.4 |
| Bosnia and Herzegovina | Female | 5 to 9   | 1.6 | 0.9 to 2.6  | 16.3  | 8.3 to 28.5    | 0.2 | 0.1 to 0.4 |
| Bosnia and Herzegovina | Female | 10 to 14 | 3.2 | 1.9 to 4.7  | 20.7  | 7.6 to 36.1    | 0.3 | 0.1 to 0.5 |
| Bosnia and Herzegovina | Female | 15 to 19 | 5   | 2.9 to 7.8  | 44.3  | 25.1 to 70.8   | 0.6 | 0.4 to 1.0 |
| Bosnia and Herzegovina | Both   | 1 to 4   | 0.6 | 0.4 to 0.9  | 19.2  | 9.6 to 33.9    | 0.2 | 0.1 to 0.4 |
| Bosnia and Herzegovina | Both   | 5 to 9   | 1.9 | 1.2 to 2.8  | 19    | 11.2 to 30.5   | 0.2 | 0.1 to 0.4 |
| Bosnia and Herzegovina | Both   | 10 to 14 | 3.6 | 2.5 to 5.0  | 25.5  | 15.4 to 38.3   | 0.3 | 0.2 to 0.5 |
| Bosnia and Herzegovina | Both   | 15 to 19 | 5.6 | 3.7 to 7.7  | 68.2  | 41.6 to 99.5   | 1   | 0.6 to 1.4 |
| Bulgaria               | Male   | 1 to 4   | 0.7 | 0.3 to 1.3  | 35.4  | 18.2 to 64.1   | 0.4 | 0.2 to 0.8 |
| Bulgaria               | Male   | 5 to 9   | 2.2 | 1.1 to 3.6  | 22.1  | 13.5 to 33.3   | 0.3 | 0.2 to 0.4 |
| Bulgaria               | Male   | 10 to 14 | 4.3 | 2.5 to 6.5  | 38.1  | 25.6 to 55.4   | 0.5 | 0.3 to 0.7 |
| Bulgaria               | Male   | 15 to 19 | 6.6 | 3.6 to 10.0 | 64.2  | 41.6 to 92.4   | 0.9 | 0.6 to 1.3 |
| Bulgaria               | Female | 1 to 4   | 0.5 | 0.3 to 0.8  | 20.3  | 11.0 to 35.4   | 0.2 | 0.1 to 0.4 |
| Bulgaria               | Female | 5 to 9   | 1.6 | 0.9 to 2.5  | 20    | 12.4 to 31.7   | 0.2 | 0.2 to 0.4 |
| Bulgaria               | Female | 10 to 14 | 3.2 | 1.8 to 4.8  | 31.3  | 21.2 to 47.8   | 0.4 | 0.3 to 0.6 |
| Bulgaria               | Female | 15 to 19 | 5   | 2.5 to 8.0  | 40.6  | 27.3 to 59.7   | 0.6 | 0.4 to 0.9 |
| Bulgaria               | Both   | 1 to 4   | 0.6 | 0.4 to 0.9  | 28.1  | 16.2 to 46.7   | 0.3 | 0.2 to 0.6 |
| Bulgaria               | Both   | 5 to 9   | 1.9 | 1.3 to 2.8  | 21.1  | 14.2 to 30.4   | 0.3 | 0.2 to 0.4 |
| Bulgaria               | Both   | 10 to 14 | 3.7 | 2.6 to 5.1  | 34.8  | 26.1 to 46.9   | 0.5 | 0.3 to 0.6 |
| Bulgaria               | Both   | 15 to 19 | 5.9 | 3.9 to 8.1  | 52.7  | 38.6 to 70.8   | 0.7 | 0.5 to 1.0 |
| Croatia                | Male   | 1 to 4   | 0.8 | 0.3 to 1.4  | 6.8   | 3.2 to 12.2    | 0.1 | 0.0 to 0.1 |
| Croatia                | Male   | 5 to 9   | 2.5 | 1.2 to 3.9  | 5.4   | 3.3 to 8.5     | 0.1 | 0.0 to 0.1 |
| Croatia                | Male   | 10 to 14 | 4.8 | 2.9 to 7.2  | 13.8  | 8.9 to 19.8    | 0.2 | 0.1 to 0.3 |
| Croatia                | Male   | 15 to 19 | 7.2 | 4.2 to 11.0 | 33.1  | 20.9 to 48.1   | 0.5 | 0.3 to 0.7 |
| Croatia                | Female | 1 to 4   | 0.5 | 0.2 to 0.9  | 8.8   | 3.8 to 15.0    | 0.1 | 0.0 to 0.2 |
| Croatia                | Female | 5 to 9   | 1.5 | 0.5 to 2.6  | 9.3   | 5.0 to 13.9    | 0.1 | 0.1 to 0.2 |
| Croatia                | Female | 10 to 14 | 3.1 | 1.7 to 4.7  | 17.9  | 11.9 to 27.2   | 0.2 | 0.2 to 0.4 |

|                |        |          |     |             |       |                |     |            |
|----------------|--------|----------|-----|-------------|-------|----------------|-----|------------|
| Croatia        | Female | 15 to 19 | 5   | 2.7 to 7.9  | 30.7  | 18.5 to 43.6   | 0.4 | 0.3 to 0.6 |
| Croatia        | Both   | 1 to 4   | 0.7 | 0.4 to 1.0  | 7.8   | 4.1 to 12.6    | 0.1 | 0.0 to 0.1 |
| Croatia        | Both   | 5 to 9   | 2   | 1.3 to 2.9  | 7.3   | 4.8 to 10.4    | 0.1 | 0.1 to 0.1 |
| Croatia        | Both   | 10 to 14 | 4   | 2.8 to 5.4  | 15.8  | 11.7 to 21.5   | 0.2 | 0.1 to 0.3 |
| Croatia        | Both   | 15 to 19 | 6.1 | 4.2 to 8.4  | 31.9  | 22.7 to 42.3   | 0.4 | 0.3 to 0.6 |
| Czech Republic | Male   | 1 to 4   | 0.8 | 0.4 to 1.3  | 4.4   | 2.0 to 7.9     | 0.1 | 0.0 to 0.1 |
| Czech Republic | Male   | 5 to 9   | 2.2 | 1.2 to 3.5  | 4.8   | 3.0 to 7.4     | 0.1 | 0.0 to 0.1 |
| Czech Republic | Male   | 10 to 14 | 4.3 | 2.6 to 6.5  | 5.6   | 3.6 to 8.1     | 0.1 | 0.0 to 0.1 |
| Czech Republic | Male   | 15 to 19 | 6.6 | 3.6 to 10.6 | 11.7  | 7.0 to 17.3    | 0.2 | 0.1 to 0.2 |
| Czech Republic | Female | 1 to 4   | 0.5 | 0.3 to 0.9  | 1.3   | 0.5 to 2.4     | 0   | 0.0 to 0.0 |
| Czech Republic | Female | 5 to 9   | 1.7 | 0.9 to 3.1  | 3.6   | 2.1 to 5.5     | 0   | 0.0 to 0.1 |
| Czech Republic | Female | 10 to 14 | 3.3 | 1.9 to 5.3  | 7.2   | 4.4 to 10.4    | 0.1 | 0.1 to 0.1 |
| Czech Republic | Female | 15 to 19 | 5   | 2.6 to 8.2  | 15    | 9.7 to 22.0    | 0.2 | 0.1 to 0.3 |
| Czech Republic | Both   | 1 to 4   | 0.6 | 0.4 to 1.0  | 2.9   | 1.5 to 4.9     | 0   | 0.0 to 0.1 |
| Czech Republic | Both   | 5 to 9   | 2   | 1.3 to 2.8  | 4.2   | 2.8 to 6.0     | 0   | 0.0 to 0.1 |
| Czech Republic | Both   | 10 to 14 | 3.8 | 2.6 to 5.1  | 6.4   | 4.5 to 8.3     | 0.1 | 0.1 to 0.1 |
| Czech Republic | Both   | 15 to 19 | 5.8 | 3.8 to 8.2  | 13.3  | 9.5 to 17.7    | 0.2 | 0.1 to 0.2 |
| Hungary        | Male   | 1 to 4   | 0.8 | 0.3 to 1.4  | 4.8   | 2.4 to 8.4     | 0.1 | 0.0 to 0.1 |
| Hungary        | Male   | 5 to 9   | 2.7 | 1.2 to 4.3  | 7.6   | 5.1 to 10.7    | 0.1 | 0.1 to 0.1 |
| Hungary        | Male   | 10 to 14 | 5.3 | 2.9 to 8.0  | 14.9  | 8.8 to 21.6    | 0.2 | 0.1 to 0.3 |
| Hungary        | Male   | 15 to 19 | 8   | 4.5 to 12.8 | 23    | 14.2 to 33.5   | 0.3 | 0.2 to 0.5 |
| Hungary        | Female | 1 to 4   | 0.7 | 0.3 to 1.1  | 4.5   | 1.8 to 12.3    | 0.1 | 0.0 to 0.1 |
| Hungary        | Female | 5 to 9   | 2   | 1.1 to 3.2  | 7.7   | 4.9 to 12.4    | 0.1 | 0.1 to 0.2 |
| Hungary        | Female | 10 to 14 | 3.9 | 2.5 to 5.8  | 13.5  | 9.1 to 19.7    | 0.2 | 0.1 to 0.3 |
| Hungary        | Female | 15 to 19 | 6.1 | 3.6 to 9.3  | 21.8  | 13.8 to 31.8   | 0.3 | 0.2 to 0.4 |
| Hungary        | Both   | 1 to 4   | 0.8 | 0.5 to 1.1  | 4.7   | 2.6 to 8.8     | 0.1 | 0.0 to 0.1 |
| Hungary        | Both   | 5 to 9   | 2.3 | 1.5 to 3.2  | 7.7   | 5.7 to 10.6    | 0.1 | 0.1 to 0.1 |
| Hungary        | Both   | 10 to 14 | 4.6 | 3.2 to 6.2  | 14.2  | 9.9 to 18.6    | 0.2 | 0.1 to 0.2 |
| Hungary        | Both   | 15 to 19 | 7.1 | 4.9 to 9.9  | 22.4  | 16.1 to 29.7   | 0.3 | 0.2 to 0.4 |
| Macedonia      | Male   | 1 to 4   | 0.7 | 0.3 to 1.2  | 40.5  | 18.1 to 78.2   | 0.5 | 0.2 to 0.9 |
| Macedonia      | Male   | 5 to 9   | 2.1 | 1.0 to 3.4  | 39.9  | 23.5 to 64.2   | 0.5 | 0.3 to 0.8 |
| Macedonia      | Male   | 10 to 14 | 4.1 | 2.1 to 6.5  | 42.6  | 24.8 to 68.2   | 0.6 | 0.3 to 0.9 |
| Macedonia      | Male   | 15 to 19 | 6.2 | 3.3 to 10.4 | 242.1 | 149.7 to 346.2 | 3.5 | 2.2 to 5.0 |

|            |        |          |     |             |       |                |     |            |
|------------|--------|----------|-----|-------------|-------|----------------|-----|------------|
| Macedonia  | Female | 1 to 4   | 0.4 | 0.2 to 0.7  | 40.6  | 18.6 to 80.9   | 0.5 | 0.2 to 1.0 |
| Macedonia  | Female | 5 to 9   | 1.4 | 0.8 to 2.4  | 36.3  | 18.5 to 60.8   | 0.5 | 0.2 to 0.8 |
| Macedonia  | Female | 10 to 14 | 2.9 | 1.6 to 4.6  | 77.8  | 51.6 to 118.9  | 1   | 0.7 to 1.6 |
| Macedonia  | Female | 15 to 19 | 4.4 | 2.2 to 7.1  | 110.6 | 60.4 to 158.9  | 1.6 | 0.9 to 2.3 |
| Macedonia  | Both   | 1 to 4   | 0.6 | 0.3 to 0.9  | 40.6  | 21.4 to 69.7   | 0.5 | 0.3 to 0.8 |
| Macedonia  | Both   | 5 to 9   | 1.8 | 1.2 to 2.6  | 38.2  | 23.2 to 59.6   | 0.5 | 0.3 to 0.7 |
| Macedonia  | Both   | 10 to 14 | 3.5 | 2.4 to 4.9  | 59.6  | 41.5 to 86.8   | 0.8 | 0.6 to 1.2 |
| Macedonia  | Both   | 15 to 19 | 5.4 | 3.5 to 7.6  | 178.3 | 122.2 to 238.3 | 2.6 | 1.8 to 3.4 |
| Montenegro | Male   | 1 to 4   | 0.8 | 0.4 to 1.2  | 278.7 | 112.3 to 594.2 | 3.3 | 1.3 to 7.1 |
| Montenegro | Male   | 5 to 9   | 2.4 | 1.3 to 3.7  | 93.6  | 47.8 to 172.4  | 1.2 | 0.6 to 2.2 |
| Montenegro | Male   | 10 to 14 | 4.8 | 2.9 to 7.1  | 114.6 | 64.0 to 189.3  | 1.5 | 0.9 to 2.6 |
| Montenegro | Male   | 15 to 19 | 7.3 | 4.3 to 11.6 | 326.2 | 201.7 to 491.3 | 4.7 | 2.9 to 7.1 |
| Montenegro | Female | 1 to 4   | 0.5 | 0.3 to 0.9  | 221.4 | 94.3 to 433.8  | 2.6 | 1.1 to 5.1 |
| Montenegro | Female | 5 to 9   | 1.6 | 0.8 to 2.5  | 130   | 73.1 to 215.7  | 1.6 | 0.9 to 2.7 |
| Montenegro | Female | 10 to 14 | 3.2 | 1.8 to 4.8  | 99.9  | 44.7 to 164.8  | 1.3 | 0.6 to 2.2 |
| Montenegro | Female | 15 to 19 | 4.9 | 2.7 to 7.8  | 104.8 | 52.9 to 169.7  | 1.5 | 0.8 to 2.4 |
| Montenegro | Both   | 1 to 4   | 0.7 | 0.4 to 0.9  | 251   | 117.0 to 501.5 | 3   | 1.4 to 6.0 |
| Montenegro | Both   | 5 to 9   | 2   | 1.3 to 2.8  | 111   | 67.8 to 183.9  | 1.4 | 0.8 to 2.3 |
| Montenegro | Both   | 10 to 14 | 4   | 2.8 to 5.4  | 107.5 | 67.1 to 159.4  | 1.4 | 0.9 to 2.2 |
| Montenegro | Both   | 15 to 19 | 6.2 | 4.1 to 8.6  | 219.1 | 146.8 to 312.6 | 3.2 | 2.1 to 4.5 |
| Poland     | Male   | 1 to 4   | 0.5 | 0.2 to 1.0  | 4.6   | 2.1 to 8.7     | 0.1 | 0.0 to 0.1 |
| Poland     | Male   | 5 to 9   | 1.8 | 0.9 to 3.1  | 5.5   | 3.2 to 8.5     | 0.1 | 0.0 to 0.1 |
| Poland     | Male   | 10 to 14 | 3.5 | 2.0 to 5.8  | 13.1  | 8.3 to 19.4    | 0.2 | 0.1 to 0.3 |
| Poland     | Male   | 15 to 19 | 5.3 | 2.7 to 8.7  | 32.7  | 19.9 to 45.5   | 0.5 | 0.3 to 0.6 |
| Poland     | Female | 1 to 4   | 0.4 | 0.2 to 0.7  | 3.2   | 1.4 to 5.8     | 0   | 0.0 to 0.1 |
| Poland     | Female | 5 to 9   | 1.2 | 0.7 to 2.0  | 5.8   | 3.5 to 9.0     | 0.1 | 0.0 to 0.1 |
| Poland     | Female | 10 to 14 | 2.5 | 1.5 to 3.7  | 13.2  | 8.6 to 19.0    | 0.2 | 0.1 to 0.3 |
| Poland     | Female | 15 to 19 | 3.9 | 2.1 to 6.5  | 22.8  | 15.0 to 32.6   | 0.3 | 0.2 to 0.5 |
| Poland     | Both   | 1 to 4   | 0.5 | 0.3 to 0.8  | 4     | 1.9 to 6.9     | 0   | 0.0 to 0.1 |
| Poland     | Both   | 5 to 9   | 1.5 | 1.0 to 2.3  | 5.7   | 3.8 to 8.0     | 0.1 | 0.0 to 0.1 |
| Poland     | Both   | 10 to 14 | 3   | 2.1 to 4.4  | 13.1  | 9.2 to 17.5    | 0.2 | 0.1 to 0.2 |
| Poland     | Both   | 15 to 19 | 4.6 | 3.1 to 6.9  | 27.8  | 20.4 to 35.2   | 0.4 | 0.3 to 0.5 |
| Romania    | Male   | 1 to 4   | 0.7 | 0.2 to 1.1  | 4.7   | 2.2 to 9.1     | 0.1 | 0.0 to 0.1 |

|          |        |          |     |             |      |              |     |            |
|----------|--------|----------|-----|-------------|------|--------------|-----|------------|
| Romania  | Male   | 5 to 9   | 2.1 | 0.7 to 3.6  | 8.1  | 4.3 to 13.2  | 0.1 | 0.1 to 0.2 |
| Romania  | Male   | 10 to 14 | 4.3 | 2.2 to 6.7  | 15.6 | 9.4 to 23.6  | 0.2 | 0.1 to 0.3 |
| Romania  | Male   | 15 to 19 | 6.8 | 3.3 to 11.3 | 27.4 | 17.5 to 39.7 | 0.4 | 0.2 to 0.6 |
| Romania  | Female | 1 to 4   | 0.5 | 0.2 to 0.8  | 2.9  | 0.9 to 5.9   | 0   | 0.0 to 0.1 |
| Romania  | Female | 5 to 9   | 1.5 | 0.7 to 2.4  | 6    | 2.8 to 10.1  | 0.1 | 0.0 to 0.1 |
| Romania  | Female | 10 to 14 | 3.1 | 1.9 to 4.6  | 16   | 8.7 to 23.9  | 0.2 | 0.1 to 0.3 |
| Romania  | Female | 15 to 19 | 4.9 | 2.9 to 7.6  | 26.7 | 16.4 to 38.4 | 0.4 | 0.2 to 0.5 |
| Romania  | Both   | 1 to 4   | 0.6 | 0.3 to 0.8  | 3.8  | 1.9 to 6.9   | 0   | 0.0 to 0.1 |
| Romania  | Both   | 5 to 9   | 1.8 | 1.1 to 2.7  | 7.1  | 4.3 to 10.8  | 0.1 | 0.0 to 0.1 |
| Romania  | Both   | 10 to 14 | 3.7 | 2.4 to 5.2  | 15.8 | 10.4 to 22.1 | 0.2 | 0.1 to 0.3 |
| Romania  | Both   | 15 to 19 | 5.9 | 3.6 to 8.6  | 27.1 | 19.7 to 35.5 | 0.4 | 0.3 to 0.5 |
| Serbia   | Male   | 1 to 4   | 0.7 | 0.3 to 1.2  | 14.2 | 8.1 to 22.9  | 0.2 | 0.1 to 0.3 |
| Serbia   | Male   | 5 to 9   | 2.2 | 1.1 to 3.6  | 10.5 | 7.0 to 14.8  | 0.1 | 0.1 to 0.2 |
| Serbia   | Male   | 10 to 14 | 4.4 | 2.7 to 6.6  | 29.7 | 20.6 to 40.6 | 0.4 | 0.3 to 0.5 |
| Serbia   | Male   | 15 to 19 | 6.9 | 3.7 to 10.6 | 47.7 | 31.1 to 69.4 | 0.7 | 0.4 to 1.0 |
| Serbia   | Female | 1 to 4   | 0.5 | 0.3 to 0.9  | 19.8 | 12.0 to 35.5 | 0.2 | 0.1 to 0.4 |
| Serbia   | Female | 5 to 9   | 1.5 | 0.7 to 2.4  | 19.8 | 14.2 to 27.3 | 0.2 | 0.2 to 0.3 |
| Serbia   | Female | 10 to 14 | 3.1 | 1.8 to 4.7  | 27.4 | 18.7 to 38.3 | 0.4 | 0.2 to 0.5 |
| Serbia   | Female | 15 to 19 | 5   | 2.7 to 8.1  | 37.5 | 22.8 to 52.1 | 0.5 | 0.3 to 0.7 |
| Serbia   | Both   | 1 to 4   | 0.6 | 0.4 to 0.9  | 16.9 | 11.0 to 26.2 | 0.2 | 0.1 to 0.3 |
| Serbia   | Both   | 5 to 9   | 1.9 | 1.2 to 2.6  | 15   | 11.2 to 19.1 | 0.2 | 0.1 to 0.2 |
| Serbia   | Both   | 10 to 14 | 3.8 | 2.7 to 5.0  | 28.6 | 21.5 to 35.9 | 0.4 | 0.3 to 0.5 |
| Serbia   | Both   | 15 to 19 | 5.9 | 4.1 to 8.3  | 42.7 | 30.6 to 56.3 | 0.6 | 0.4 to 0.8 |
| Slovakia | Male   | 1 to 4   | 0.8 | 0.4 to 1.4  | 9    | 3.9 to 18.7  | 0.1 | 0.0 to 0.2 |
| Slovakia | Male   | 5 to 9   | 2.4 | 1.2 to 3.7  | 9.6  | 4.9 to 16.8  | 0.1 | 0.1 to 0.2 |
| Slovakia | Male   | 10 to 14 | 4.5 | 2.6 to 6.8  | 21.9 | 13.4 to 32.8 | 0.3 | 0.2 to 0.4 |
| Slovakia | Male   | 15 to 19 | 6.8 | 3.9 to 10.4 | 26.4 | 16.4 to 39.6 | 0.4 | 0.2 to 0.6 |
| Slovakia | Female | 1 to 4   | 0.5 | 0.2 to 0.9  | 5.3  | 2.6 to 10.0  | 0.1 | 0.0 to 0.1 |
| Slovakia | Female | 5 to 9   | 1.6 | 0.8 to 2.6  | 7.2  | 3.5 to 12.6  | 0.1 | 0.0 to 0.2 |
| Slovakia | Female | 10 to 14 | 3.1 | 1.8 to 4.8  | 15.1 | 9.8 to 23.8  | 0.2 | 0.1 to 0.3 |
| Slovakia | Female | 15 to 19 | 4.9 | 2.8 to 7.5  | 19   | 11.6 to 27.7 | 0.3 | 0.2 to 0.4 |
| Slovakia | Both   | 1 to 4   | 0.6 | 0.4 to 1.0  | 7.2  | 3.7 to 13.6  | 0.1 | 0.0 to 0.2 |
| Slovakia | Both   | 5 to 9   | 2   | 1.2 to 2.9  | 8.5  | 4.9 to 13.6  | 0.1 | 0.1 to 0.2 |

|          |        |          |     |             |      |              |     |            |
|----------|--------|----------|-----|-------------|------|--------------|-----|------------|
| Slovakia | Both   | 10 to 14 | 3.8 | 2.5 to 5.2  | 18.6 | 12.8 to 26.1 | 0.2 | 0.2 to 0.3 |
| Slovakia | Both   | 15 to 19 | 5.9 | 3.8 to 8.0  | 22.8 | 16.3 to 30.6 | 0.3 | 0.2 to 0.4 |
| Slovenia | Male   | 1 to 4   | 0.8 | 0.4 to 1.3  | 8.9  | 3.6 to 18.7  | 0.1 | 0.0 to 0.2 |
| Slovenia | Male   | 5 to 9   | 2.4 | 1.2 to 3.8  | 6.7  | 3.6 to 11.3  | 0.1 | 0.0 to 0.1 |
| Slovenia | Male   | 10 to 14 | 4.6 | 2.6 to 6.7  | 16.8 | 10.9 to 25.4 | 0.2 | 0.1 to 0.3 |
| Slovenia | Male   | 15 to 19 | 6.8 | 4.0 to 10.2 | 17.3 | 9.9 to 26.4  | 0.2 | 0.1 to 0.4 |
| Slovenia | Female | 1 to 4   | 0.5 | 0.2 to 0.8  | 1.9  | 0.3 to 4.5   | 0   | 0.0 to 0.1 |
| Slovenia | Female | 5 to 9   | 1.6 | 0.7 to 2.6  | 5.1  | 3.2 to 8.5   | 0.1 | 0.0 to 0.1 |
| Slovenia | Female | 10 to 14 | 3.2 | 1.9 to 4.9  | 4.4  | 1.9 to 7.5   | 0.1 | 0.0 to 0.1 |
| Slovenia | Female | 15 to 19 | 5.2 | 2.9 to 8.1  | 15   | 9.6 to 21.9  | 0.2 | 0.1 to 0.3 |
| Slovenia | Both   | 1 to 4   | 0.6 | 0.4 to 0.9  | 5.5  | 2.1 to 11.2  | 0.1 | 0.0 to 0.1 |
| Slovenia | Both   | 5 to 9   | 2   | 1.2 to 2.8  | 5.9  | 3.8 to 9.1   | 0.1 | 0.0 to 0.1 |
| Slovenia | Both   | 10 to 14 | 3.9 | 2.6 to 5.2  | 10.8 | 7.1 to 15.8  | 0.1 | 0.1 to 0.2 |
| Slovenia | Both   | 15 to 19 | 6   | 4.0 to 8.3  | 16.2 | 10.8 to 22.6 | 0.2 | 0.1 to 0.3 |
| Belarus  | Male   | 1 to 4   | 0.2 | 0.1 to 0.4  | 0.1  | 0.1 to 0.2   | 0   | 0.0 to 0.0 |
| Belarus  | Male   | 5 to 9   | 0.6 | 0.3 to 1.3  | 3.4  | 1.5 to 5.7   | 0   | 0.0 to 0.1 |
| Belarus  | Male   | 10 to 14 | 1.2 | 0.6 to 2.1  | 4.7  | 2.4 to 7.8   | 0.1 | 0.0 to 0.1 |
| Belarus  | Male   | 15 to 19 | 1.8 | 0.9 to 3.2  | 26.5 | 15.1 to 42.3 | 0.4 | 0.2 to 0.6 |
| Belarus  | Female | 1 to 4   | 0.2 | 0.1 to 0.4  | 2.6  | 1.1 to 4.8   | 0   | 0.0 to 0.1 |
| Belarus  | Female | 5 to 9   | 0.6 | 0.2 to 1.1  | 4    | 1.9 to 6.6   | 0   | 0.0 to 0.1 |
| Belarus  | Female | 10 to 14 | 1   | 0.5 to 1.6  | 9    | 4.7 to 13.8  | 0.1 | 0.1 to 0.2 |
| Belarus  | Female | 15 to 19 | 1.5 | 0.8 to 2.5  | 26.2 | 14.4 to 39.6 | 0.4 | 0.2 to 0.6 |
| Belarus  | Both   | 1 to 4   | 0.2 | 0.1 to 0.3  | 1.3  | 0.6 to 2.4   | 0   | 0.0 to 0.0 |
| Belarus  | Both   | 5 to 9   | 0.6 | 0.3 to 1.0  | 3.7  | 1.9 to 5.7   | 0   | 0.0 to 0.1 |
| Belarus  | Both   | 10 to 14 | 1.1 | 0.7 to 1.7  | 6.8  | 4.0 to 9.8   | 0.1 | 0.1 to 0.1 |
| Belarus  | Both   | 15 to 19 | 1.6 | 1.0 to 2.6  | 26.4 | 17.5 to 36.6 | 0.4 | 0.2 to 0.5 |
| Estonia  | Male   | 1 to 4   | 0.6 | 0.2 to 1.4  | 1.6  | 0.4 to 3.3   | 0   | 0.0 to 0.0 |
| Estonia  | Male   | 5 to 9   | 1.6 | 0.6 to 3.7  | 2    | 0.9 to 3.3   | 0   | 0.0 to 0.0 |
| Estonia  | Male   | 10 to 14 | 2.8 | 1.3 to 4.9  | 4.8  | 2.5 to 7.3   | 0.1 | 0.0 to 0.1 |
| Estonia  | Male   | 15 to 19 | 3.9 | 1.9 to 6.8  | 16.8 | 8.8 to 25.9  | 0.2 | 0.1 to 0.4 |
| Estonia  | Female | 1 to 4   | 0.5 | 0.1 to 1.1  | 1.3  | 0.7 to 2.5   | 0   | 0.0 to 0.0 |
| Estonia  | Female | 5 to 9   | 1.2 | 0.4 to 2.8  | 1.7  | 1.0 to 2.5   | 0   | 0.0 to 0.0 |
| Estonia  | Female | 10 to 14 | 2.1 | 0.9 to 4.4  | 6.1  | 4.0 to 10.2  | 0.1 | 0.1 to 0.1 |

|           |        |          |     |            |      |              |     |            |
|-----------|--------|----------|-----|------------|------|--------------|-----|------------|
| Estonia   | Female | 15 to 19 | 3.1 | 1.4 to 6.1 | 10.5 | 5.9 to 15.9  | 0.1 | 0.1 to 0.2 |
| Estonia   | Both   | 1 to 4   | 0.5 | 0.3 to 1.0 | 1.5  | 0.8 to 2.5   | 0   | 0.0 to 0.0 |
| Estonia   | Both   | 5 to 9   | 1.4 | 0.7 to 2.8 | 1.9  | 1.1 to 2.7   | 0   | 0.0 to 0.0 |
| Estonia   | Both   | 10 to 14 | 2.4 | 1.5 to 4.0 | 5.4  | 3.9 to 7.4   | 0.1 | 0.0 to 0.1 |
| Estonia   | Both   | 15 to 19 | 3.5 | 2.1 to 5.6 | 13.7 | 8.3 to 19.3  | 0.2 | 0.1 to 0.3 |
| Latvia    | Male   | 1 to 4   | 0.4 | 0.1 to 0.8 | 3.2  | 1.3 to 5.8   | 0   | 0.0 to 0.1 |
| Latvia    | Male   | 5 to 9   | 1.1 | 0.4 to 2.3 | 3.9  | 1.5 to 6.4   | 0   | 0.0 to 0.1 |
| Latvia    | Male   | 10 to 14 | 2   | 1.0 to 3.6 | 7.7  | 4.3 to 11.8  | 0.1 | 0.1 to 0.2 |
| Latvia    | Male   | 15 to 19 | 3   | 1.5 to 5.6 | 29.3 | 14.7 to 46.5 | 0.4 | 0.2 to 0.7 |
| Latvia    | Female | 1 to 4   | 0.3 | 0.1 to 0.9 | 0.7  | 0.1 to 1.5   | 0   | 0.0 to 0.0 |
| Latvia    | Female | 5 to 9   | 1   | 0.3 to 2.7 | 5.6  | 3.5 to 9.6   | 0.1 | 0.0 to 0.1 |
| Latvia    | Female | 10 to 14 | 1.7 | 0.7 to 3.5 | 7.2  | 4.4 to 10.4  | 0.1 | 0.1 to 0.1 |
| Latvia    | Female | 15 to 19 | 2.4 | 1.0 to 4.5 | 13.3 | 6.2 to 20.8  | 0.2 | 0.1 to 0.3 |
| Latvia    | Both   | 1 to 4   | 0.4 | 0.2 to 0.7 | 2    | 0.8 to 3.3   | 0   | 0.0 to 0.0 |
| Latvia    | Both   | 5 to 9   | 1.1 | 0.5 to 1.9 | 4.7  | 3.3 to 6.4   | 0.1 | 0.0 to 0.1 |
| Latvia    | Both   | 10 to 14 | 1.8 | 1.1 to 2.9 | 7.4  | 5.0 to 10.1  | 0.1 | 0.1 to 0.1 |
| Latvia    | Both   | 15 to 19 | 2.7 | 1.5 to 4.2 | 21.6 | 12.4 to 31.3 | 0.3 | 0.2 to 0.4 |
| Lithuania | Male   | 1 to 4   | 0.3 | 0.1 to 0.6 | 1    | 0.3 to 1.8   | 0   | 0.0 to 0.0 |
| Lithuania | Male   | 5 to 9   | 0.9 | 0.4 to 1.9 | 1.8  | 0.9 to 2.9   | 0   | 0.0 to 0.0 |
| Lithuania | Male   | 10 to 14 | 1.6 | 0.8 to 3.1 | 5.4  | 2.9 to 8.5   | 0.1 | 0.0 to 0.1 |
| Lithuania | Male   | 15 to 19 | 2.3 | 1.0 to 4.7 | 22.4 | 12.9 to 35.0 | 0.3 | 0.2 to 0.5 |
| Lithuania | Female | 1 to 4   | 0.2 | 0.1 to 0.5 | 0.7  | 0.3 to 1.1   | 0   | 0.0 to 0.0 |
| Lithuania | Female | 5 to 9   | 0.7 | 0.3 to 1.7 | 0.5  | 0.1 to 0.9   | 0   | 0.0 to 0.0 |
| Lithuania | Female | 10 to 14 | 1.3 | 0.6 to 2.9 | 4.4  | 2.6 to 6.7   | 0.1 | 0.0 to 0.1 |
| Lithuania | Female | 15 to 19 | 2   | 0.8 to 4.5 | 15.2 | 9.4 to 22.8  | 0.2 | 0.1 to 0.3 |
| Lithuania | Both   | 1 to 4   | 0.3 | 0.1 to 0.5 | 0.8  | 0.4 to 1.4   | 0   | 0.0 to 0.0 |
| Lithuania | Both   | 5 to 9   | 0.8 | 0.4 to 1.5 | 1.1  | 0.6 to 1.8   | 0   | 0.0 to 0.0 |
| Lithuania | Both   | 10 to 14 | 1.4 | 0.8 to 2.6 | 4.9  | 3.2 to 6.8   | 0.1 | 0.0 to 0.1 |
| Lithuania | Both   | 15 to 19 | 2.2 | 1.2 to 4.0 | 18.9 | 12.7 to 26.4 | 0.3 | 0.2 to 0.4 |
| Moldova   | Male   | 1 to 4   | 0.5 | 0.2 to 1.1 | 4.8  | 2.3 to 8.7   | 0.1 | 0.0 to 0.1 |
| Moldova   | Male   | 5 to 9   | 1.5 | 0.6 to 3.2 | 7.1  | 4.1 to 10.4  | 0.1 | 0.0 to 0.1 |
| Moldova   | Male   | 10 to 14 | 2.5 | 1.1 to 5.2 | 5.7  | 3.5 to 8.6   | 0.1 | 0.0 to 0.1 |
| Moldova   | Male   | 15 to 19 | 3.5 | 1.3 to 8.1 | 48.7 | 30.4 to 72.9 | 0.7 | 0.4 to 1.0 |

|         |        |          |     |            |      |              |     |            |
|---------|--------|----------|-----|------------|------|--------------|-----|------------|
| Moldova | Female | 1 to 4   | 0.3 | 0.1 to 0.8 | 2    | 1.0 to 4.6   | 0   | 0.0 to 0.1 |
| Moldova | Female | 5 to 9   | 1   | 0.4 to 2.2 | 3.5  | 2.1 to 5.6   | 0   | 0.0 to 0.1 |
| Moldova | Female | 10 to 14 | 1.7 | 0.8 to 3.4 | 9.1  | 4.9 to 13.5  | 0.1 | 0.1 to 0.2 |
| Moldova | Female | 15 to 19 | 2.5 | 1.1 to 5.1 | 37.2 | 23.8 to 56.2 | 0.5 | 0.3 to 0.8 |
| Moldova | Both   | 1 to 4   | 0.4 | 0.2 to 0.7 | 3.4  | 1.9 to 6.1   | 0   | 0.0 to 0.1 |
| Moldova | Both   | 5 to 9   | 1.2 | 0.6 to 2.2 | 5.3  | 3.5 to 7.5   | 0.1 | 0.0 to 0.1 |
| Moldova | Both   | 10 to 14 | 2.1 | 1.2 to 3.5 | 7.4  | 4.7 to 10.1  | 0.1 | 0.1 to 0.1 |
| Moldova | Both   | 15 to 19 | 3   | 1.6 to 5.2 | 43   | 31.0 to 57.4 | 0.6 | 0.4 to 0.8 |
| Russia  | Male   | 1 to 4   | 0.4 | 0.1 to 0.7 | 3.3  | 1.6 to 5.6   | 0   | 0.0 to 0.1 |
| Russia  | Male   | 5 to 9   | 1.3 | 0.4 to 2.2 | 4.6  | 2.5 to 7.3   | 0.1 | 0.0 to 0.1 |
| Russia  | Male   | 10 to 14 | 2.6 | 1.3 to 4.1 | 10.6 | 6.5 to 15.4  | 0.1 | 0.1 to 0.2 |
| Russia  | Male   | 15 to 19 | 4.1 | 2.1 to 6.8 | 46.1 | 29.4 to 66.7 | 0.7 | 0.4 to 1.0 |
| Russia  | Female | 1 to 4   | 0.3 | 0.1 to 0.7 | 5    | 1.4 to 8.4   | 0.1 | 0.0 to 0.1 |
| Russia  | Female | 5 to 9   | 1   | 0.3 to 2.1 | 7.7  | 4.5 to 14.0  | 0.1 | 0.1 to 0.2 |
| Russia  | Female | 10 to 14 | 1.9 | 0.9 to 3.5 | 12.9 | 5.6 to 19.2  | 0.2 | 0.1 to 0.3 |
| Russia  | Female | 15 to 19 | 3   | 1.5 to 5.5 | 42.5 | 19.8 to 61.4 | 0.6 | 0.3 to 0.9 |
| Russia  | Both   | 1 to 4   | 0.4 | 0.2 to 0.6 | 4.1  | 2.0 to 6.3   | 0   | 0.0 to 0.1 |
| Russia  | Both   | 5 to 9   | 1.1 | 0.5 to 1.9 | 6.1  | 4.0 to 8.9   | 0.1 | 0.0 to 0.1 |
| Russia  | Both   | 10 to 14 | 2.3 | 1.3 to 3.3 | 11.7 | 8.0 to 15.6  | 0.2 | 0.1 to 0.2 |
| Russia  | Both   | 15 to 19 | 3.5 | 2.2 to 5.6 | 44.3 | 31.9 to 58.3 | 0.6 | 0.5 to 0.8 |
| Ukraine | Male   | 1 to 4   | 0.6 | 0.2 to 1.7 | 5.9  | 2.5 to 11.1  | 0.1 | 0.0 to 0.1 |
| Ukraine | Male   | 5 to 9   | 1.7 | 0.6 to 4.9 | 8    | 3.6 to 13.2  | 0.1 | 0.0 to 0.2 |
| Ukraine | Male   | 10 to 14 | 3   | 1.3 to 6.0 | 9.5  | 5.1 to 15.4  | 0.1 | 0.1 to 0.2 |
| Ukraine | Male   | 15 to 19 | 4.3 | 1.9 to 9.1 | 29.4 | 16.8 to 45.9 | 0.4 | 0.2 to 0.7 |
| Ukraine | Female | 1 to 4   | 0.5 | 0.1 to 1.1 | 5.1  | 2.1 to 9.4   | 0.1 | 0.0 to 0.1 |
| Ukraine | Female | 5 to 9   | 1.3 | 0.4 to 3.6 | 7.3  | 4.2 to 11.0  | 0.1 | 0.1 to 0.1 |
| Ukraine | Female | 10 to 14 | 2.3 | 0.9 to 5.5 | 13.2 | 7.0 to 19.1  | 0.2 | 0.1 to 0.3 |
| Ukraine | Female | 15 to 19 | 3.2 | 1.3 to 7.6 | 24.2 | 12.8 to 35.8 | 0.3 | 0.2 to 0.5 |
| Ukraine | Both   | 1 to 4   | 0.6 | 0.3 to 1.2 | 5.5  | 2.6 to 9.2   | 0.1 | 0.0 to 0.1 |
| Ukraine | Both   | 5 to 9   | 1.5 | 0.7 to 3.3 | 7.7  | 4.6 to 11.0  | 0.1 | 0.1 to 0.1 |
| Ukraine | Both   | 10 to 14 | 2.6 | 1.5 to 4.9 | 11.3 | 6.6 to 15.7  | 0.1 | 0.1 to 0.2 |
| Ukraine | Both   | 15 to 19 | 3.7 | 2.1 to 7.1 | 26.9 | 16.8 to 37.3 | 0.4 | 0.2 to 0.5 |
| Brunei  | Male   | 1 to 4   | 2   | 0.9 to 3.1 | 13.1 | 2.4 to 36.6  | 0.2 | 0.0 to 0.4 |

|             |        |          |      |              |      |               |     |            |
|-------------|--------|----------|------|--------------|------|---------------|-----|------------|
| Brunei      | Male   | 5 to 9   | 5.6  | 2.5 to 8.2   | 3.6  | 2.0 to 6.4    | 0   | 0.0 to 0.1 |
| Brunei      | Male   | 10 to 14 | 11   | 7.0 to 15.4  | 20.6 | 11.1 to 34.8  | 0.3 | 0.1 to 0.4 |
| Brunei      | Male   | 15 to 19 | 18.1 | 11.7 to 25.0 | 58.3 | 29.6 to 102.3 | 0.8 | 0.4 to 1.4 |
| Brunei      | Female | 1 to 4   | 1    | 0.6 to 1.5   | 1.5  | 0.4 to 3.8    | 0   | 0.0 to 0.0 |
| Brunei      | Female | 5 to 9   | 3.2  | 2.2 to 4.6   | 41.2 | 13.0 to 105.9 | 0.5 | 0.2 to 1.3 |
| Brunei      | Female | 10 to 14 | 6.6  | 4.4 to 9.1   | 34.8 | 12.7 to 81.2  | 0.5 | 0.2 to 1.1 |
| Brunei      | Female | 15 to 19 | 10.8 | 7.0 to 15.6  | 4.8  | 1.7 to 9.6    | 0   | 0.0 to 0.1 |
| Brunei      | Both   | 1 to 4   | 1.5  | 1.0 to 2.1   | 7.4  | 2.0 to 19.1   | 0.1 | 0.0 to 0.2 |
| Brunei      | Both   | 5 to 9   | 4.4  | 2.9 to 6.0   | 21.9 | 8.0 to 54.2   | 0.3 | 0.1 to 0.7 |
| Brunei      | Both   | 10 to 14 | 8.9  | 6.5 to 11.4  | 27.5 | 14.6 to 49.4  | 0.4 | 0.2 to 0.6 |
| Brunei      | Both   | 15 to 19 | 14.6 | 10.8 to 18.9 | 32.5 | 18.0 to 54.3  | 0.4 | 0.2 to 0.7 |
| Japan       | Male   | 1 to 4   | 1.8  | 1.2 to 2.7   | 9.6  | 5.0 to 16.0   | 0.1 | 0.1 to 0.2 |
| Japan       | Male   | 5 to 9   | 5.4  | 3.6 to 7.3   | 6.5  | 4.2 to 9.0    | 0.1 | 0.0 to 0.1 |
| Japan       | Male   | 10 to 14 | 10.5 | 7.4 to 14.7  | 13.2 | 8.8 to 17.9   | 0.2 | 0.1 to 0.2 |
| Japan       | Male   | 15 to 19 | 16.9 | 11.5 to 24.0 | 19.9 | 13.5 to 28.8  | 0.2 | 0.2 to 0.4 |
| Japan       | Female | 1 to 4   | 1    | 0.6 to 1.4   | 6.4  | 3.7 to 11.7   | 0.1 | 0.0 to 0.1 |
| Japan       | Female | 5 to 9   | 3    | 1.8 to 4.2   | 8.6  | 5.3 to 12.4   | 0.1 | 0.1 to 0.2 |
| Japan       | Female | 10 to 14 | 6    | 4.0 to 8.4   | 9    | 6.5 to 13.6   | 0.1 | 0.1 to 0.2 |
| Japan       | Female | 15 to 19 | 10.1 | 6.4 to 14.3  | 16.6 | 11.5 to 25.2  | 0.2 | 0.1 to 0.3 |
| Japan       | Both   | 1 to 4   | 1.4  | 1.0 to 1.9   | 8    | 5.0 to 12.1   | 0.1 | 0.1 to 0.1 |
| Japan       | Both   | 5 to 9   | 4.2  | 3.1 to 5.4   | 7.5  | 5.3 to 9.9    | 0.1 | 0.1 to 0.1 |
| Japan       | Both   | 10 to 14 | 8.3  | 6.3 to 10.8  | 11.2 | 8.4 to 14.2   | 0.1 | 0.1 to 0.2 |
| Japan       | Both   | 15 to 19 | 13.6 | 9.9 to 17.5  | 18.3 | 14.0 to 24.1  | 0.2 | 0.2 to 0.3 |
| South Korea | Male   | 1 to 4   | 1.9  | 1.1 to 2.8   | 13.5 | 7.1 to 22.8   | 0.2 | 0.1 to 0.3 |
| South Korea | Male   | 5 to 9   | 5.3  | 3.4 to 7.6   | 9.7  | 5.5 to 14.0   | 0.1 | 0.1 to 0.2 |
| South Korea | Male   | 10 to 14 | 10.4 | 7.3 to 14.6  | 16.2 | 10.1 to 22.8  | 0.2 | 0.1 to 0.3 |
| South Korea | Male   | 15 to 19 | 17   | 11.1 to 24.5 | 26.9 | 16.1 to 38.0  | 0.3 | 0.2 to 0.5 |
| South Korea | Female | 1 to 4   | 1.1  | 0.7 to 1.6   | 11.9 | 6.9 to 22.7   | 0.1 | 0.1 to 0.3 |
| South Korea | Female | 5 to 9   | 3.1  | 2.0 to 4.4   | 11   | 6.6 to 16.0   | 0.1 | 0.1 to 0.2 |
| South Korea | Female | 10 to 14 | 6.3  | 4.2 to 8.6   | 13.4 | 9.0 to 20.8   | 0.2 | 0.1 to 0.3 |
| South Korea | Female | 15 to 19 | 10.4 | 6.8 to 14.6  | 18.7 | 12.3 to 33.6  | 0.2 | 0.2 to 0.5 |
| South Korea | Both   | 1 to 4   | 1.5  | 1.0 to 2.0   | 12.7 | 7.7 to 21.2   | 0.1 | 0.1 to 0.2 |
| South Korea | Both   | 5 to 9   | 4.3  | 3.2 to 5.6   | 10.3 | 6.6 to 13.8   | 0.1 | 0.1 to 0.2 |

|             |        |          |      |              |      |              |     |            |
|-------------|--------|----------|------|--------------|------|--------------|-----|------------|
| South Korea | Both   | 10 to 14 | 8.4  | 6.5 to 10.8  | 14.9 | 11.2 to 19.1 | 0.2 | 0.1 to 0.2 |
| South Korea | Both   | 15 to 19 | 13.8 | 10.4 to 18.3 | 23   | 17.3 to 30.4 | 0.3 | 0.2 to 0.4 |
| Singapore   | Male   | 1 to 4   | 2    | 1.0 to 3.2   | 1.7  | 0.6 to 3.6   | 0   | 0.0 to 0.0 |
| Singapore   | Male   | 5 to 9   | 5.7  | 3.3 to 8.6   | 3.7  | 2.3 to 5.5   | 0   | 0.0 to 0.1 |
| Singapore   | Male   | 10 to 14 | 11.3 | 7.6 to 16.2  | 12   | 7.5 to 17.5  | 0.1 | 0.1 to 0.2 |
| Singapore   | Male   | 15 to 19 | 18.3 | 13.0 to 26.2 | 16.8 | 10.3 to 24.9 | 0.2 | 0.1 to 0.3 |
| Singapore   | Female | 1 to 4   | 1.1  | 0.7 to 1.7   | 2    | 0.9 to 3.4   | 0   | 0.0 to 0.0 |
| Singapore   | Female | 5 to 9   | 3.3  | 1.9 to 4.8   | 7.2  | 4.0 to 12.7  | 0.1 | 0.0 to 0.2 |
| Singapore   | Female | 10 to 14 | 6.4  | 4.0 to 9.1   | 4.8  | 2.2 to 7.2   | 0.1 | 0.0 to 0.1 |
| Singapore   | Female | 15 to 19 | 10.3 | 6.2 to 15.3  | 12.7 | 7.9 to 21.8  | 0.2 | 0.1 to 0.3 |
| Singapore   | Both   | 1 to 4   | 1.6  | 1.0 to 2.2   | 1.9  | 0.8 to 3.2   | 0   | 0.0 to 0.0 |
| Singapore   | Both   | 5 to 9   | 4.5  | 3.1 to 6.1   | 5.4  | 3.5 to 8.2   | 0.1 | 0.0 to 0.1 |
| Singapore   | Both   | 10 to 14 | 8.9  | 6.6 to 11.6  | 8.5  | 5.6 to 11.6  | 0.1 | 0.1 to 0.1 |
| Singapore   | Both   | 15 to 19 | 14.4 | 10.6 to 18.5 | 14.8 | 10.4 to 20.2 | 0.2 | 0.1 to 0.3 |
| Australia   | Male   | 1 to 4   | 1.4  | 0.8 to 2.1   | 2.7  | 1.4 to 4.5   | 0   | 0.0 to 0.0 |
| Australia   | Male   | 5 to 9   | 4    | 2.5 to 5.7   | 2.6  | 1.7 to 3.7   | 0   | 0.0 to 0.0 |
| Australia   | Male   | 10 to 14 | 7.9  | 5.2 to 10.7  | 5.3  | 3.4 to 7.5   | 0.1 | 0.0 to 0.1 |
| Australia   | Male   | 15 to 19 | 13   | 8.3 to 17.9  | 13.8 | 8.4 to 19.9  | 0.2 | 0.1 to 0.3 |
| Australia   | Female | 1 to 4   | 0.9  | 0.5 to 1.4   | 2.1  | 1.1 to 3.2   | 0   | 0.0 to 0.0 |
| Australia   | Female | 5 to 9   | 2.6  | 1.5 to 3.8   | 3    | 2.0 to 4.7   | 0   | 0.0 to 0.1 |
| Australia   | Female | 10 to 14 | 5.1  | 3.2 to 7.3   | 5.6  | 3.7 to 7.8   | 0.1 | 0.0 to 0.1 |
| Australia   | Female | 15 to 19 | 8.3  | 5.2 to 12.1  | 12   | 6.9 to 17.2  | 0.2 | 0.1 to 0.2 |
| Australia   | Both   | 1 to 4   | 1.1  | 0.8 to 1.5   | 2.4  | 1.4 to 3.5   | 0   | 0.0 to 0.0 |
| Australia   | Both   | 5 to 9   | 3.3  | 2.3 to 4.4   | 2.8  | 2.1 to 3.7   | 0   | 0.0 to 0.0 |
| Australia   | Both   | 10 to 14 | 6.5  | 4.8 to 8.4   | 5.4  | 3.9 to 7.1   | 0.1 | 0.0 to 0.1 |
| Australia   | Both   | 15 to 19 | 10.7 | 7.8 to 13.7  | 12.9 | 8.7 to 17.0  | 0.2 | 0.1 to 0.2 |
| New Zealand | Male   | 1 to 4   | 1.6  | 1.0 to 2.2   | 2.1  | 1.0 to 3.6   | 0   | 0.0 to 0.0 |
| New Zealand | Male   | 5 to 9   | 4.6  | 3.2 to 6.3   | 2.4  | 1.5 to 3.4   | 0   | 0.0 to 0.0 |
| New Zealand | Male   | 10 to 14 | 9.4  | 6.7 to 12.4  | 8.2  | 5.7 to 11.7  | 0.1 | 0.1 to 0.1 |
| New Zealand | Male   | 15 to 19 | 15.5 | 11.1 to 20.8 | 15.9 | 10.2 to 23.5 | 0.2 | 0.1 to 0.3 |
| New Zealand | Female | 1 to 4   | 0.9  | 0.5 to 1.2   | 4.9  | 2.5 to 7.7   | 0.1 | 0.0 to 0.1 |
| New Zealand | Female | 5 to 9   | 2.8  | 1.8 to 3.9   | 3    | 1.8 to 4.3   | 0   | 0.0 to 0.0 |
| New Zealand | Female | 10 to 14 | 5.7  | 3.9 to 7.7   | 6.4  | 3.9 to 9.1   | 0.1 | 0.0 to 0.1 |

|             |        |          |      |             |      |              |     |            |
|-------------|--------|----------|------|-------------|------|--------------|-----|------------|
| New Zealand | Female | 15 to 19 | 9.6  | 6.5 to 13.5 | 17   | 10.4 to 24.2 | 0.2 | 0.1 to 0.3 |
| New Zealand | Both   | 1 to 4   | 1.2  | 0.9 to 1.6  | 3.4  | 2.0 to 5.0   | 0   | 0.0 to 0.1 |
| New Zealand | Both   | 5 to 9   | 3.7  | 2.8 to 4.7  | 2.7  | 1.9 to 3.6   | 0   | 0.0 to 0.0 |
| New Zealand | Both   | 10 to 14 | 7.6  | 5.9 to 9.4  | 7.4  | 5.5 to 9.5   | 0.1 | 0.1 to 0.1 |
| New Zealand | Both   | 15 to 19 | 12.6 | 9.6 to 16.0 | 16.4 | 11.7 to 21.8 | 0.2 | 0.1 to 0.3 |
| Andorra     | Male   | 1 to 4   | 1.2  | 0.5 to 2.0  | 1.6  | 0.6 to 4.0   | 0   | 0.0 to 0.0 |
| Andorra     | Male   | 5 to 9   | 3.4  | 1.5 to 5.7  | 2    | 1.0 to 3.9   | 0   | 0.0 to 0.0 |
| Andorra     | Male   | 10 to 14 | 6.4  | 3.5 to 10.3 | 4.8  | 2.6 to 8.3   | 0.1 | 0.0 to 0.1 |
| Andorra     | Male   | 15 to 19 | 9.6  | 5.3 to 15.8 | 11.3 | 5.9 to 19.9  | 0.1 | 0.1 to 0.3 |
| Andorra     | Female | 1 to 4   | 0.9  | 0.4 to 1.5  | 2    | 0.7 to 5.1   | 0   | 0.0 to 0.1 |
| Andorra     | Female | 5 to 9   | 2.5  | 1.2 to 4.6  | 2.4  | 1.1 to 4.8   | 0   | 0.0 to 0.1 |
| Andorra     | Female | 10 to 14 | 5    | 2.5 to 8.5  | 5.3  | 2.5 to 10.0  | 0.1 | 0.0 to 0.1 |
| Andorra     | Female | 15 to 19 | 8.2  | 4.1 to 14.1 | 8.5  | 4.1 to 15.4  | 0.1 | 0.0 to 0.2 |
| Andorra     | Both   | 1 to 4   | 1    | 0.5 to 1.6  | 1.8  | 0.7 to 4.1   | 0   | 0.0 to 0.0 |
| Andorra     | Both   | 5 to 9   | 3    | 1.7 to 4.5  | 2.2  | 1.3 to 3.9   | 0   | 0.0 to 0.0 |
| Andorra     | Both   | 10 to 14 | 5.7  | 3.6 to 8.2  | 5.1  | 3.1 to 8.1   | 0.1 | 0.0 to 0.1 |
| Andorra     | Both   | 15 to 19 | 8.9  | 5.9 to 13.1 | 9.9  | 6.0 to 15.7  | 0.1 | 0.1 to 0.2 |
| Austria     | Male   | 1 to 4   | 1.4  | 0.7 to 2.5  | 4.5  | 2.1 to 8.0   | 0.1 | 0.0 to 0.1 |
| Austria     | Male   | 5 to 9   | 3.8  | 1.8 to 6.8  | 3.3  | 2.0 to 5.0   | 0   | 0.0 to 0.1 |
| Austria     | Male   | 10 to 14 | 7.1  | 4.0 to 11.2 | 7.9  | 4.9 to 11.4  | 0.1 | 0.1 to 0.1 |
| Austria     | Male   | 15 to 19 | 11   | 6.9 to 17.1 | 19.2 | 11.6 to 29.1 | 0.3 | 0.1 to 0.4 |
| Austria     | Female | 1 to 4   | 0.9  | 0.3 to 1.7  | 5.3  | 3.2 to 9.0   | 0.1 | 0.0 to 0.1 |
| Austria     | Female | 5 to 9   | 2.6  | 1.1 to 4.7  | 5.7  | 3.6 to 10.1  | 0.1 | 0.0 to 0.1 |
| Austria     | Female | 10 to 14 | 5    | 2.5 to 8.2  | 9.6  | 6.6 to 14.2  | 0.1 | 0.1 to 0.2 |
| Austria     | Female | 15 to 19 | 8.1  | 3.8 to 13.4 | 15   | 9.5 to 22.5  | 0.2 | 0.1 to 0.3 |
| Austria     | Both   | 1 to 4   | 1.1  | 0.5 to 1.8  | 4.9  | 3.0 to 7.3   | 0.1 | 0.0 to 0.1 |
| Austria     | Both   | 5 to 9   | 3.2  | 1.8 to 4.9  | 4.5  | 3.2 to 6.5   | 0   | 0.0 to 0.1 |
| Austria     | Both   | 10 to 14 | 6.1  | 3.7 to 8.8  | 8.7  | 6.5 to 11.3  | 0.1 | 0.1 to 0.1 |
| Austria     | Both   | 15 to 19 | 9.6  | 6.2 to 13.7 | 17.1 | 11.9 to 23.2 | 0.2 | 0.2 to 0.3 |
| Belgium     | Male   | 1 to 4   | 1.3  | 0.6 to 2.7  | 7.7  | 4.2 to 12.4  | 0.1 | 0.0 to 0.1 |
| Belgium     | Male   | 5 to 9   | 3.7  | 1.8 to 7.1  | 4.6  | 3.1 to 6.4   | 0.1 | 0.0 to 0.1 |
| Belgium     | Male   | 10 to 14 | 6.7  | 3.7 to 11.9 | 10.9 | 7.5 to 15.0  | 0.1 | 0.1 to 0.2 |
| Belgium     | Male   | 15 to 19 | 10.5 | 6.0 to 18.5 | 21.6 | 14.2 to 31.9 | 0.3 | 0.2 to 0.4 |

|         |        |          |     |             |      |               |     |            |
|---------|--------|----------|-----|-------------|------|---------------|-----|------------|
| Belgium | Female | 1 to 4   | 0.9 | 0.4 to 1.8  | 7.7  | 4.3 to 16.0   | 0.1 | 0.0 to 0.2 |
| Belgium | Female | 5 to 9   | 2.6 | 1.2 to 5.2  | 6.8  | 4.4 to 11.6   | 0.1 | 0.1 to 0.1 |
| Belgium | Female | 10 to 14 | 4.9 | 2.4 to 8.3  | 11.4 | 7.2 to 15.9   | 0.1 | 0.1 to 0.2 |
| Belgium | Female | 15 to 19 | 7.9 | 3.3 to 13.0 | 23.6 | 14.6 to 40.6  | 0.3 | 0.2 to 0.6 |
| Belgium | Both   | 1 to 4   | 1.1 | 0.6 to 1.8  | 7.7  | 4.9 to 12.1   | 0.1 | 0.1 to 0.1 |
| Belgium | Both   | 5 to 9   | 3.1 | 1.8 to 5.0  | 5.7  | 4.2 to 8.1    | 0.1 | 0.0 to 0.1 |
| Belgium | Both   | 10 to 14 | 5.9 | 3.8 to 8.7  | 11.1 | 8.1 to 14.3   | 0.1 | 0.1 to 0.2 |
| Belgium | Both   | 15 to 19 | 9.2 | 5.8 to 13.9 | 22.6 | 16.5 to 31.5  | 0.3 | 0.2 to 0.4 |
| Cyprus  | Male   | 1 to 4   | 1.2 | 0.7 to 2.2  | 3.7  | 1.3 to 7.7    | 0   | 0.0 to 0.1 |
| Cyprus  | Male   | 5 to 9   | 3.5 | 1.8 to 6.0  | 18.7 | 13.0 to 26.2  | 0.2 | 0.2 to 0.3 |
| Cyprus  | Male   | 10 to 14 | 6.5 | 3.7 to 10.7 | 4.4  | 2.4 to 6.7    | 0   | 0.0 to 0.1 |
| Cyprus  | Male   | 15 to 19 | 10  | 5.5 to 17.5 | 13.6 | 7.6 to 21.9   | 0.2 | 0.1 to 0.3 |
| Cyprus  | Female | 1 to 4   | 0.8 | 0.4 to 1.6  | 3.2  | 0.3 to 7.2    | 0   | 0.0 to 0.1 |
| Cyprus  | Female | 5 to 9   | 2.5 | 1.1 to 4.6  | 47.4 | 25.8 to 100.8 | 0.6 | 0.3 to 1.3 |
| Cyprus  | Female | 10 to 14 | 4.9 | 2.4 to 8.3  | 36.1 | 24.5 to 56.8  | 0.5 | 0.3 to 0.8 |
| Cyprus  | Female | 15 to 19 | 8   | 3.8 to 14.1 | 10.3 | 2.1 to 18.9   | 0.1 | 0.0 to 0.3 |
| Cyprus  | Both   | 1 to 4   | 1   | 0.6 to 1.6  | 3.4  | 0.9 to 6.8    | 0   | 0.0 to 0.1 |
| Cyprus  | Both   | 5 to 9   | 3   | 1.8 to 4.5  | 32.6 | 20.9 to 58.3  | 0.4 | 0.3 to 0.7 |
| Cyprus  | Both   | 10 to 14 | 5.7 | 3.9 to 8.2  | 19.9 | 14.0 to 29.6  | 0.3 | 0.2 to 0.4 |
| Cyprus  | Both   | 15 to 19 | 9   | 5.7 to 13.2 | 12   | 5.6 to 18.5   | 0.2 | 0.1 to 0.2 |
| Denmark | Male   | 1 to 4   | 0.9 | 0.5 to 1.5  | 1.7  | 0.9 to 3.0    | 0   | 0.0 to 0.0 |
| Denmark | Male   | 5 to 9   | 2.5 | 1.3 to 4.0  | 2.1  | 1.4 to 3.0    | 0   | 0.0 to 0.0 |
| Denmark | Male   | 10 to 14 | 4.7 | 2.9 to 7.3  | 5.5  | 3.5 to 7.8    | 0.1 | 0.0 to 0.1 |
| Denmark | Male   | 15 to 19 | 7.4 | 4.6 to 11.5 | 10   | 6.4 to 15.1   | 0.1 | 0.1 to 0.2 |
| Denmark | Female | 1 to 4   | 0.6 | 0.3 to 1.1  | 2.5  | 1.4 to 4.3    | 0   | 0.0 to 0.0 |
| Denmark | Female | 5 to 9   | 1.7 | 0.9 to 2.8  | 1.6  | 1.1 to 2.3    | 0   | 0.0 to 0.0 |
| Denmark | Female | 10 to 14 | 3   | 1.7 to 4.5  | 3.7  | 2.3 to 5.2    | 0   | 0.0 to 0.1 |
| Denmark | Female | 15 to 19 | 4.6 | 2.5 to 7.3  | 6.7  | 4.0 to 9.8    | 0.1 | 0.0 to 0.1 |
| Denmark | Both   | 1 to 4   | 0.8 | 0.5 to 1.2  | 2.1  | 1.3 to 3.2    | 0   | 0.0 to 0.0 |
| Denmark | Both   | 5 to 9   | 2.1 | 1.3 to 3.1  | 1.9  | 1.4 to 2.5    | 0   | 0.0 to 0.0 |
| Denmark | Both   | 10 to 14 | 3.9 | 2.7 to 5.3  | 4.6  | 3.2 to 6.0    | 0.1 | 0.0 to 0.1 |
| Denmark | Both   | 15 to 19 | 6   | 4.0 to 8.5  | 8.4  | 6.0 to 11.4   | 0.1 | 0.1 to 0.1 |
| Finland | Male   | 1 to 4   | 1.7 | 0.9 to 2.6  | 1.9  | 1.1 to 3.2    | 0   | 0.0 to 0.0 |

|         |        |          |      |             |      |              |     |            |
|---------|--------|----------|------|-------------|------|--------------|-----|------------|
| Finland | Male   | 5 to 9   | 4.7  | 2.8 to 6.9  | 2.7  | 1.6 to 4.0   | 0   | 0.0 to 0.0 |
| Finland | Male   | 10 to 14 | 9    | 6.1 to 12.8 | 8    | 5.3 to 11.2  | 0.1 | 0.1 to 0.1 |
| Finland | Male   | 15 to 19 | 14.5 | 9.6 to 20.6 | 20.5 | 13.2 to 30.5 | 0.3 | 0.2 to 0.4 |
| Finland | Female | 1 to 4   | 1.2  | 0.7 to 1.7  | 1.3  | 0.8 to 2.0   | 0   | 0.0 to 0.0 |
| Finland | Female | 5 to 9   | 3.3  | 2.1 to 4.8  | 3.5  | 2.1 to 6.6   | 0   | 0.0 to 0.1 |
| Finland | Female | 10 to 14 | 6.4  | 4.4 to 8.8  | 6.8  | 4.5 to 9.8   | 0.1 | 0.0 to 0.1 |
| Finland | Female | 15 to 19 | 10.3 | 6.9 to 14.8 | 15.6 | 10.4 to 23.3 | 0.2 | 0.1 to 0.3 |
| Finland | Both   | 1 to 4   | 1.4  | 1.0 to 1.9  | 1.6  | 1.0 to 2.3   | 0   | 0.0 to 0.0 |
| Finland | Both   | 5 to 9   | 4    | 3.0 to 5.3  | 3.1  | 2.2 to 4.4   | 0   | 0.0 to 0.0 |
| Finland | Both   | 10 to 14 | 7.7  | 6.1 to 9.8  | 7.4  | 5.4 to 9.5   | 0.1 | 0.1 to 0.1 |
| Finland | Both   | 15 to 19 | 12.4 | 9.7 to 16.0 | 18.1 | 13.0 to 24.4 | 0.2 | 0.2 to 0.3 |
| France  | Male   | 1 to 4   | 0.4  | 0.2 to 0.9  | 12.9 | 7.0 to 20.1  | 0.2 | 0.1 to 0.2 |
| France  | Male   | 5 to 9   | 1.2  | 0.5 to 2.2  | 6.9  | 4.5 to 9.8   | 0.1 | 0.1 to 0.1 |
| France  | Male   | 10 to 14 | 2.2  | 1.2 to 3.6  | 13.9 | 9.4 to 19.3  | 0.2 | 0.1 to 0.3 |
| France  | Male   | 15 to 19 | 3.6  | 1.9 to 6.3  | 24.4 | 16.0 to 34.8 | 0.3 | 0.2 to 0.5 |
| France  | Female | 1 to 4   | 0.4  | 0.1 to 0.9  | 9    | 5.5 to 14.8  | 0.1 | 0.1 to 0.2 |
| France  | Female | 5 to 9   | 1    | 0.4 to 2.7  | 6.4  | 4.4 to 10.1  | 0.1 | 0.1 to 0.1 |
| France  | Female | 10 to 14 | 1.8  | 0.9 to 3.3  | 12.4 | 8.7 to 17.9  | 0.2 | 0.1 to 0.2 |
| France  | Female | 15 to 19 | 2.8  | 1.4 to 5.2  | 18.3 | 11.7 to 26.1 | 0.3 | 0.2 to 0.4 |
| France  | Both   | 1 to 4   | 0.4  | 0.2 to 0.7  | 11   | 7.1 to 15.9  | 0.1 | 0.1 to 0.2 |
| France  | Both   | 5 to 9   | 1.1  | 0.7 to 2.0  | 6.7  | 5.0 to 8.9   | 0.1 | 0.1 to 0.1 |
| France  | Both   | 10 to 14 | 2    | 1.3 to 3.0  | 13.2 | 10.0 to 16.8 | 0.2 | 0.1 to 0.2 |
| France  | Both   | 15 to 19 | 3.2  | 2.0 to 4.7  | 21.4 | 16.1 to 27.9 | 0.3 | 0.2 to 0.4 |
| Germany | Male   | 1 to 4   | 1.6  | 0.9 to 2.5  | 5    | 2.7 to 8.3   | 0.1 | 0.0 to 0.1 |
| Germany | Male   | 5 to 9   | 4.4  | 2.7 to 6.9  | 4.1  | 2.7 to 5.6   | 0   | 0.0 to 0.1 |
| Germany | Male   | 10 to 14 | 8.3  | 5.3 to 12.6 | 8.1  | 5.5 to 11.1  | 0.1 | 0.1 to 0.1 |
| Germany | Male   | 15 to 19 | 13   | 8.1 to 19.7 | 14.2 | 9.7 to 19.9  | 0.2 | 0.1 to 0.3 |
| Germany | Female | 1 to 4   | 1.5  | 0.8 to 2.3  | 3.8  | 2.4 to 5.7   | 0   | 0.0 to 0.1 |
| Germany | Female | 5 to 9   | 4.1  | 2.4 to 6.4  | 3.5  | 2.4 to 5.0   | 0   | 0.0 to 0.1 |
| Germany | Female | 10 to 14 | 7.8  | 4.8 to 11.7 | 7.7  | 5.2 to 10.6  | 0.1 | 0.1 to 0.1 |
| Germany | Female | 15 to 19 | 12.5 | 7.5 to 18.2 | 11.6 | 7.2 to 15.9  | 0.1 | 0.1 to 0.2 |
| Germany | Both   | 1 to 4   | 1.5  | 1.0 to 2.1  | 4.4  | 2.9 to 6.4   | 0   | 0.0 to 0.1 |
| Germany | Both   | 5 to 9   | 4.2  | 2.9 to 5.9  | 3.8  | 2.8 to 4.8   | 0   | 0.0 to 0.1 |

|         |        |          |      |             |      |              |     |            |
|---------|--------|----------|------|-------------|------|--------------|-----|------------|
| Germany | Both   | 10 to 14 | 8    | 5.9 to 10.7 | 7.9  | 6.0 to 10.1  | 0.1 | 0.1 to 0.1 |
| Germany | Both   | 15 to 19 | 12.7 | 9.3 to 16.9 | 13   | 9.5 to 16.6  | 0.2 | 0.1 to 0.2 |
| Greece  | Male   | 1 to 4   | 1    | 0.5 to 1.9  | 8.4  | 5.1 to 12.8  | 0.1 | 0.1 to 0.1 |
| Greece  | Male   | 5 to 9   | 2.9  | 1.5 to 4.8  | 10.9 | 8.0 to 14.5  | 0.1 | 0.1 to 0.2 |
| Greece  | Male   | 10 to 14 | 5.6  | 3.3 to 8.3  | 20.3 | 13.9 to 27.4 | 0.3 | 0.2 to 0.4 |
| Greece  | Male   | 15 to 19 | 8.8  | 5.1 to 13.1 | 40.2 | 25.9 to 55.9 | 0.6 | 0.4 to 0.8 |
| Greece  | Female | 1 to 4   | 0.6  | 0.3 to 1.0  | 8.9  | 5.0 to 17.7  | 0.1 | 0.1 to 0.2 |
| Greece  | Female | 5 to 9   | 1.8  | 0.8 to 3.1  | 12.4 | 7.5 to 24.3  | 0.2 | 0.1 to 0.3 |
| Greece  | Female | 10 to 14 | 3.6  | 2.0 to 5.6  | 18.9 | 12.6 to 26.0 | 0.2 | 0.2 to 0.3 |
| Greece  | Female | 15 to 19 | 6.1  | 3.5 to 9.5  | 25.9 | 17.4 to 38.6 | 0.4 | 0.2 to 0.5 |
| Greece  | Both   | 1 to 4   | 0.8  | 0.5 to 1.3  | 8.6  | 5.7 to 13.6  | 0.1 | 0.1 to 0.2 |
| Greece  | Both   | 5 to 9   | 2.4  | 1.5 to 3.6  | 11.6 | 8.7 to 17.4  | 0.1 | 0.1 to 0.2 |
| Greece  | Both   | 10 to 14 | 4.6  | 3.2 to 6.5  | 19.6 | 15.0 to 24.4 | 0.3 | 0.2 to 0.3 |
| Greece  | Both   | 15 to 19 | 7.5  | 5.2 to 10.3 | 33.2 | 24.7 to 43.9 | 0.5 | 0.3 to 0.6 |
| Iceland | Male   | 1 to 4   | 1.4  | 0.7 to 2.3  | 0.3  | 0.2 to 0.5   | 0   | 0.0 to 0.0 |
| Iceland | Male   | 5 to 9   | 3.7  | 2.2 to 5.9  | 0.7  | 0.4 to 1.1   | 0   | 0.0 to 0.0 |
| Iceland | Male   | 10 to 14 | 7.2  | 4.5 to 10.3 | 4.4  | 2.5 to 6.6   | 0   | 0.0 to 0.1 |
| Iceland | Male   | 15 to 19 | 11.6 | 7.4 to 16.7 | 13.5 | 5.7 to 22.3  | 0.2 | 0.1 to 0.3 |
| Iceland | Female | 1 to 4   | 0.9  | 0.3 to 1.5  | 3.6  | 1.6 to 8.4   | 0   | 0.0 to 0.1 |
| Iceland | Female | 5 to 9   | 2.4  | 1.0 to 4.3  | 0.7  | 0.3 to 1.1   | 0   | 0.0 to 0.0 |
| Iceland | Female | 10 to 14 | 4.8  | 2.3 to 8.1  | 7.3  | 5.0 to 11.4  | 0.1 | 0.1 to 0.1 |
| Iceland | Female | 15 to 19 | 7.9  | 3.9 to 13.4 | 16.2 | 8.5 to 24.1  | 0.2 | 0.1 to 0.3 |
| Iceland | Both   | 1 to 4   | 1.1  | 0.6 to 1.7  | 1.9  | 0.9 to 4.2   | 0   | 0.0 to 0.0 |
| Iceland | Both   | 5 to 9   | 3.1  | 1.9 to 4.5  | 0.7  | 0.4 to 1.0   | 0   | 0.0 to 0.0 |
| Iceland | Both   | 10 to 14 | 6    | 4.2 to 8.0  | 5.9  | 4.2 to 8.0   | 0.1 | 0.0 to 0.1 |
| Iceland | Both   | 15 to 19 | 9.8  | 7.0 to 13.1 | 14.8 | 7.8 to 21.1  | 0.2 | 0.1 to 0.3 |
| Ireland | Male   | 1 to 4   | 1.5  | 0.6 to 2.8  | 3.2  | 1.7 to 5.4   | 0   | 0.0 to 0.1 |
| Ireland | Male   | 5 to 9   | 3.9  | 1.8 to 7.7  | 4.6  | 2.7 to 6.9   | 0   | 0.0 to 0.1 |
| Ireland | Male   | 10 to 14 | 7    | 3.6 to 12.6 | 11.7 | 8.0 to 16.8  | 0.1 | 0.1 to 0.2 |
| Ireland | Male   | 15 to 19 | 10.6 | 5.2 to 19.0 | 31.6 | 19.5 to 47.0 | 0.4 | 0.3 to 0.7 |
| Ireland | Female | 1 to 4   | 0.9  | 0.3 to 1.7  | 5.5  | 3.1 to 9.2   | 0.1 | 0.0 to 0.1 |
| Ireland | Female | 5 to 9   | 2.5  | 0.9 to 5.0  | 4.4  | 2.8 to 7.1   | 0   | 0.0 to 0.1 |
| Ireland | Female | 10 to 14 | 4.9  | 2.3 to 8.3  | 10.8 | 6.1 to 15.4  | 0.1 | 0.1 to 0.2 |

|            |        |          |      |             |      |              |     |            |
|------------|--------|----------|------|-------------|------|--------------|-----|------------|
| Ireland    | Female | 15 to 19 | 7.8  | 3.8 to 13.2 | 22.9 | 14.3 to 34.1 | 0.3 | 0.2 to 0.5 |
| Ireland    | Both   | 1 to 4   | 1.2  | 0.6 to 1.8  | 4.3  | 2.5 to 6.7   | 0   | 0.0 to 0.1 |
| Ireland    | Both   | 5 to 9   | 3.3  | 2.0 to 5.0  | 4.5  | 3.1 to 6.2   | 0   | 0.0 to 0.1 |
| Ireland    | Both   | 10 to 14 | 6    | 4.0 to 8.7  | 11.3 | 7.8 to 14.8  | 0.1 | 0.1 to 0.2 |
| Ireland    | Both   | 15 to 19 | 9.3  | 5.8 to 13.5 | 27.3 | 19.0 to 36.4 | 0.4 | 0.3 to 0.5 |
| Israel     | Male   | 1 to 4   | 0.9  | 0.5 to 1.5  | 1.1  | 0.6 to 1.8   | 0   | 0.0 to 0.0 |
| Israel     | Male   | 5 to 9   | 2.4  | 1.4 to 3.5  | 2.3  | 1.4 to 3.3   | 0   | 0.0 to 0.0 |
| Israel     | Male   | 10 to 14 | 4.5  | 2.8 to 6.3  | 2.1  | 1.4 to 3.0   | 0   | 0.0 to 0.0 |
| Israel     | Male   | 15 to 19 | 7    | 4.5 to 10.1 | 5.6  | 3.5 to 8.2   | 0.1 | 0.0 to 0.1 |
| Israel     | Female | 1 to 4   | 0.5  | 0.2 to 0.7  | 1    | 0.4 to 1.8   | 0   | 0.0 to 0.0 |
| Israel     | Female | 5 to 9   | 1.2  | 0.7 to 2.0  | 1.4  | 0.8 to 2.2   | 0   | 0.0 to 0.0 |
| Israel     | Female | 10 to 14 | 2.3  | 1.4 to 3.7  | 2.6  | 1.2 to 3.9   | 0   | 0.0 to 0.0 |
| Israel     | Female | 15 to 19 | 3.8  | 2.2 to 5.9  | 5    | 3.1 to 8.1   | 0.1 | 0.0 to 0.1 |
| Israel     | Both   | 1 to 4   | 0.7  | 0.4 to 1.0  | 1.1  | 0.6 to 1.6   | 0   | 0.0 to 0.0 |
| Israel     | Both   | 5 to 9   | 1.8  | 1.2 to 2.5  | 1.8  | 1.3 to 2.5   | 0   | 0.0 to 0.0 |
| Israel     | Both   | 10 to 14 | 3.4  | 2.4 to 4.6  | 2.3  | 1.5 to 3.2   | 0   | 0.0 to 0.0 |
| Israel     | Both   | 15 to 19 | 5.4  | 3.8 to 7.2  | 5.3  | 3.8 to 7.4   | 0.1 | 0.0 to 0.1 |
| Italy      | Male   | 1 to 4   | 1    | 0.6 to 1.5  | 6.3  | 3.0 to 11.3  | 0.1 | 0.0 to 0.1 |
| Italy      | Male   | 5 to 9   | 2.8  | 1.7 to 4.2  | 7.1  | 4.7 to 10.1  | 0.1 | 0.1 to 0.1 |
| Italy      | Male   | 10 to 14 | 5.4  | 3.4 to 7.7  | 15.6 | 10.7 to 21.4 | 0.2 | 0.1 to 0.3 |
| Italy      | Male   | 15 to 19 | 8.6  | 5.4 to 12.3 | 24.9 | 15.9 to 36.0 | 0.3 | 0.2 to 0.5 |
| Italy      | Female | 1 to 4   | 0.7  | 0.4 to 1.1  | 8.2  | 4.7 to 15.5  | 0.1 | 0.1 to 0.2 |
| Italy      | Female | 5 to 9   | 2.1  | 1.3 to 3.1  | 8.6  | 5.4 to 15.7  | 0.1 | 0.1 to 0.2 |
| Italy      | Female | 10 to 14 | 4    | 2.6 to 5.7  | 15.6 | 10.7 to 22.9 | 0.2 | 0.1 to 0.3 |
| Italy      | Female | 15 to 19 | 6.3  | 4.1 to 9.3  | 23.4 | 15.5 to 35.4 | 0.3 | 0.2 to 0.5 |
| Italy      | Both   | 1 to 4   | 0.9  | 0.6 to 1.2  | 7.2  | 4.7 to 11.3  | 0.1 | 0.1 to 0.1 |
| Italy      | Both   | 5 to 9   | 2.5  | 1.8 to 3.3  | 7.8  | 5.7 to 11.2  | 0.1 | 0.1 to 0.1 |
| Italy      | Both   | 10 to 14 | 4.7  | 3.6 to 6.0  | 15.6 | 11.6 to 20.3 | 0.2 | 0.1 to 0.3 |
| Italy      | Both   | 15 to 19 | 7.5  | 5.5 to 9.7  | 24.2 | 18.0 to 31.7 | 0.3 | 0.2 to 0.4 |
| Luxembourg | Male   | 1 to 4   | 1.3  | 0.5 to 2.6  | 2.6  | 1.0 to 5.0   | 0   | 0.0 to 0.1 |
| Luxembourg | Male   | 5 to 9   | 3.6  | 1.7 to 6.8  | 7.4  | 4.5 to 10.6  | 0.1 | 0.0 to 0.1 |
| Luxembourg | Male   | 10 to 14 | 6.7  | 3.8 to 10.8 | 14.6 | 7.4 to 22.2  | 0.2 | 0.1 to 0.3 |
| Luxembourg | Male   | 15 to 19 | 10.5 | 5.9 to 17.0 | 20.4 | 12.4 to 31.3 | 0.3 | 0.2 to 0.4 |

|             |        |          |     |             |      |               |     |            |
|-------------|--------|----------|-----|-------------|------|---------------|-----|------------|
| Luxembourg  | Female | 1 to 4   | 0.9 | 0.3 to 1.5  | 6.7  | 3.6 to 12.0   | 0.1 | 0.0 to 0.1 |
| Luxembourg  | Female | 5 to 9   | 2.5 | 0.7 to 4.3  | 5.4  | 3.3 to 10.0   | 0.1 | 0.0 to 0.1 |
| Luxembourg  | Female | 10 to 14 | 4.7 | 1.3 to 7.7  | 2.5  | 0.4 to 4.5    | 0   | 0.0 to 0.0 |
| Luxembourg  | Female | 15 to 19 | 7.6 | 1.9 to 12.8 | 4.5  | 0.9 to 8.1    | 0   | 0.0 to 0.1 |
| Luxembourg  | Both   | 1 to 4   | 1.1 | 0.6 to 1.7  | 4.6  | 2.6 to 7.4    | 0.1 | 0.0 to 0.1 |
| Luxembourg  | Both   | 5 to 9   | 3   | 1.8 to 4.7  | 6.5  | 4.3 to 9.3    | 0.1 | 0.0 to 0.1 |
| Luxembourg  | Both   | 10 to 14 | 5.7 | 3.8 to 8.1  | 8.7  | 4.2 to 13.2   | 0.1 | 0.0 to 0.2 |
| Luxembourg  | Both   | 15 to 19 | 9.1 | 5.7 to 13.2 | 12.7 | 7.8 to 18.5   | 0.2 | 0.1 to 0.2 |
| Malta       | Male   | 1 to 4   | 1.4 | 0.6 to 2.7  | 10.5 | 6.0 to 18.4   | 0.1 | 0.1 to 0.2 |
| Malta       | Male   | 5 to 9   | 3.7 | 1.5 to 7.3  | 21.1 | 11.0 to 32.2  | 0.3 | 0.1 to 0.4 |
| Malta       | Male   | 10 to 14 | 6.7 | 3.2 to 11.9 | 26.9 | 17.9 to 38.2  | 0.3 | 0.2 to 0.5 |
| Malta       | Male   | 15 to 19 | 10  | 5.1 to 16.9 | 47.6 | 28.8 to 70.5  | 0.7 | 0.4 to 1.0 |
| Malta       | Female | 1 to 4   | 0.8 | 0.4 to 1.6  | 6.7  | 2.2 to 11.6   | 0.1 | 0.0 to 0.1 |
| Malta       | Female | 5 to 9   | 2.4 | 1.0 to 4.5  | 3.5  | 0.7 to 6.2    | 0   | 0.0 to 0.1 |
| Malta       | Female | 10 to 14 | 4.7 | 2.0 to 7.6  | 46.1 | 23.6 to 103.2 | 0.6 | 0.3 to 1.4 |
| Malta       | Female | 15 to 19 | 7.7 | 3.2 to 12.8 | 26.2 | 14.4 to 39.0  | 0.4 | 0.2 to 0.5 |
| Malta       | Both   | 1 to 4   | 1.1 | 0.6 to 1.8  | 8.6  | 5.2 to 13.4   | 0.1 | 0.1 to 0.2 |
| Malta       | Both   | 5 to 9   | 3.1 | 1.6 to 5.3  | 12.5 | 6.3 to 19.2   | 0.2 | 0.1 to 0.2 |
| Malta       | Both   | 10 to 14 | 5.7 | 3.4 to 8.6  | 36.2 | 23.9 to 63.0  | 0.5 | 0.3 to 0.8 |
| Malta       | Both   | 15 to 19 | 8.9 | 5.4 to 13.3 | 37.3 | 24.2 to 51.4  | 0.5 | 0.3 to 0.7 |
| Netherlands | Male   | 1 to 4   | 1   | 0.5 to 1.7  | 6.4  | 3.5 to 10.2   | 0.1 | 0.0 to 0.1 |
| Netherlands | Male   | 5 to 9   | 2.8 | 1.5 to 4.0  | 3.5  | 2.3 to 5.0    | 0   | 0.0 to 0.1 |
| Netherlands | Male   | 10 to 14 | 5.3 | 3.3 to 7.5  | 8.3  | 5.4 to 11.9   | 0.1 | 0.1 to 0.1 |
| Netherlands | Male   | 15 to 19 | 8.6 | 5.3 to 12.3 | 15.7 | 10.0 to 22.8  | 0.2 | 0.1 to 0.3 |
| Netherlands | Female | 1 to 4   | 0.8 | 0.4 to 1.2  | 6.1  | 2.8 to 9.8    | 0.1 | 0.0 to 0.1 |
| Netherlands | Female | 5 to 9   | 2.2 | 1.0 to 3.5  | 4    | 2.6 to 5.7    | 0   | 0.0 to 0.1 |
| Netherlands | Female | 10 to 14 | 4.5 | 2.7 to 6.5  | 11.4 | 6.9 to 15.9   | 0.1 | 0.1 to 0.2 |
| Netherlands | Female | 15 to 19 | 7.3 | 4.4 to 10.7 | 15.3 | 9.3 to 22.0   | 0.2 | 0.1 to 0.3 |
| Netherlands | Both   | 1 to 4   | 0.9 | 0.5 to 1.3  | 6.3  | 3.7 to 9.2    | 0.1 | 0.0 to 0.1 |
| Netherlands | Both   | 5 to 9   | 2.5 | 1.6 to 3.4  | 3.7  | 2.7 to 4.9    | 0   | 0.0 to 0.1 |
| Netherlands | Both   | 10 to 14 | 4.9 | 3.5 to 6.4  | 9.8  | 6.6 to 12.8   | 0.1 | 0.1 to 0.2 |
| Netherlands | Both   | 15 to 19 | 8   | 5.7 to 10.4 | 15.5 | 10.6 to 20.2  | 0.2 | 0.1 to 0.3 |
| Norway      | Male   | 1 to 4   | 1   | 0.5 to 1.7  | 2.5  | 1.4 to 4.2    | 0   | 0.0 to 0.0 |

|          |        |          |      |             |      |              |     |            |
|----------|--------|----------|------|-------------|------|--------------|-----|------------|
| Norway   | Male   | 5 to 9   | 2.9  | 1.6 to 4.5  | 1.5  | 1.0 to 2.1   | 0   | 0.0 to 0.0 |
| Norway   | Male   | 10 to 14 | 5.5  | 3.3 to 8.2  | 4.6  | 3.0 to 6.4   | 0   | 0.0 to 0.1 |
| Norway   | Male   | 15 to 19 | 8.6  | 5.2 to 12.7 | 12.1 | 7.7 to 17.6  | 0.2 | 0.1 to 0.2 |
| Norway   | Female | 1 to 4   | 0.8  | 0.4 to 1.4  | 0.9  | 0.5 to 1.4   | 0   | 0.0 to 0.0 |
| Norway   | Female | 5 to 9   | 2.2  | 1.1 to 3.7  | 2.2  | 1.3 to 4.3   | 0   | 0.0 to 0.0 |
| Norway   | Female | 10 to 14 | 4.2  | 2.2 to 6.7  | 4    | 2.6 to 5.7   | 0   | 0.0 to 0.1 |
| Norway   | Female | 15 to 19 | 6.8  | 3.7 to 11.1 | 9.7  | 6.3 to 14.4  | 0.1 | 0.1 to 0.2 |
| Norway   | Both   | 1 to 4   | 0.9  | 0.6 to 1.4  | 1.7  | 1.1 to 2.7   | 0   | 0.0 to 0.0 |
| Norway   | Both   | 5 to 9   | 2.6  | 1.7 to 3.8  | 1.8  | 1.3 to 2.9   | 0   | 0.0 to 0.0 |
| Norway   | Both   | 10 to 14 | 4.9  | 3.3 to 6.8  | 4.3  | 3.1 to 5.6   | 0   | 0.0 to 0.1 |
| Norway   | Both   | 15 to 19 | 7.7  | 5.3 to 10.8 | 11   | 8.0 to 14.5  | 0.1 | 0.1 to 0.2 |
| Portugal | Male   | 1 to 4   | 1.2  | 0.6 to 2.2  | 5    | 2.8 to 7.8   | 0.1 | 0.0 to 0.1 |
| Portugal | Male   | 5 to 9   | 3.4  | 1.8 to 6.0  | 5    | 3.3 to 7.1   | 0.1 | 0.0 to 0.1 |
| Portugal | Male   | 10 to 14 | 6.3  | 3.6 to 10.3 | 12.2 | 8.5 to 17.2  | 0.2 | 0.1 to 0.2 |
| Portugal | Male   | 15 to 19 | 9.8  | 5.3 to 16.6 | 22.5 | 14.7 to 32.7 | 0.3 | 0.2 to 0.5 |
| Portugal | Female | 1 to 4   | 1.1  | 0.5 to 2.0  | 3.6  | 2.1 to 5.5   | 0   | 0.0 to 0.1 |
| Portugal | Female | 5 to 9   | 3.5  | 1.6 to 6.2  | 5.1  | 3.5 to 8.4   | 0.1 | 0.0 to 0.1 |
| Portugal | Female | 10 to 14 | 6.9  | 3.7 to 11.0 | 11.6 | 8.0 to 18.4  | 0.1 | 0.1 to 0.2 |
| Portugal | Female | 15 to 19 | 11.2 | 5.5 to 18.7 | 16.1 | 10.8 to 26.3 | 0.2 | 0.1 to 0.4 |
| Portugal | Both   | 1 to 4   | 1.2  | 0.7 to 1.9  | 4.3  | 2.8 to 6.2   | 0   | 0.0 to 0.1 |
| Portugal | Both   | 5 to 9   | 3.4  | 2.0 to 5.5  | 5    | 3.8 to 6.6   | 0.1 | 0.0 to 0.1 |
| Portugal | Both   | 10 to 14 | 6.6  | 4.2 to 9.5  | 11.9 | 9.1 to 15.9  | 0.1 | 0.1 to 0.2 |
| Portugal | Both   | 15 to 19 | 10.5 | 6.6 to 15.7 | 19.4 | 14.6 to 25.7 | 0.3 | 0.2 to 0.3 |
| Spain    | Male   | 1 to 4   | 1.7  | 0.9 to 2.8  | 12   | 6.7 to 19.2  | 0.1 | 0.1 to 0.2 |
| Spain    | Male   | 5 to 9   | 4.4  | 2.5 to 6.8  | 11.1 | 7.3 to 16.0  | 0.1 | 0.1 to 0.2 |
| Spain    | Male   | 10 to 14 | 7.9  | 4.9 to 11.2 | 19.6 | 13.6 to 27.4 | 0.2 | 0.2 to 0.4 |
| Spain    | Male   | 15 to 19 | 12   | 7.5 to 16.7 | 31.1 | 20.0 to 43.9 | 0.4 | 0.3 to 0.6 |
| Spain    | Female | 1 to 4   | 1.3  | 0.5 to 2.1  | 13.6 | 8.5 to 20.9  | 0.2 | 0.1 to 0.2 |
| Spain    | Female | 5 to 9   | 3.4  | 1.5 to 5.5  | 11.8 | 7.6 to 21.0  | 0.1 | 0.1 to 0.3 |
| Spain    | Female | 10 to 14 | 6.4  | 3.5 to 9.3  | 18.8 | 13.6 to 26.9 | 0.2 | 0.2 to 0.3 |
| Spain    | Female | 15 to 19 | 10   | 6.0 to 15.0 | 25.7 | 17.2 to 37.0 | 0.3 | 0.2 to 0.5 |
| Spain    | Both   | 1 to 4   | 1.5  | 0.9 to 2.2  | 12.8 | 8.3 to 18.6  | 0.1 | 0.1 to 0.2 |
| Spain    | Both   | 5 to 9   | 3.9  | 2.5 to 5.4  | 11.4 | 8.4 to 15.6  | 0.1 | 0.1 to 0.2 |

|                |        |          |      |             |      |              |     |            |
|----------------|--------|----------|------|-------------|------|--------------|-----|------------|
| Spain          | Both   | 10 to 14 | 7.2  | 5.0 to 9.3  | 19.2 | 14.7 to 24.6 | 0.2 | 0.2 to 0.3 |
| Spain          | Both   | 15 to 19 | 11   | 7.8 to 14.2 | 28.5 | 20.9 to 36.8 | 0.4 | 0.3 to 0.5 |
| Sweden         | Male   | 1 to 4   | 1.6  | 0.9 to 2.5  | 1.5  | 0.8 to 2.5   | 0   | 0.0 to 0.0 |
| Sweden         | Male   | 5 to 9   | 4.5  | 2.6 to 6.9  | 2.7  | 1.9 to 3.9   | 0   | 0.0 to 0.0 |
| Sweden         | Male   | 10 to 14 | 8.8  | 5.6 to 12.3 | 7.1  | 4.7 to 10.2  | 0.1 | 0.0 to 0.1 |
| Sweden         | Male   | 15 to 19 | 14.1 | 9.1 to 19.4 | 11.8 | 7.5 to 17.0  | 0.1 | 0.1 to 0.2 |
| Sweden         | Female | 1 to 4   | 1.1  | 0.3 to 1.8  | 1.6  | 0.8 to 2.6   | 0   | 0.0 to 0.0 |
| Sweden         | Female | 5 to 9   | 3.2  | 1.4 to 5.0  | 2.1  | 1.4 to 3.1   | 0   | 0.0 to 0.0 |
| Sweden         | Female | 10 to 14 | 6.5  | 3.4 to 9.6  | 5    | 3.2 to 6.9   | 0.1 | 0.0 to 0.1 |
| Sweden         | Female | 15 to 19 | 10.5 | 5.6 to 16.3 | 10.1 | 6.4 to 14.3  | 0.1 | 0.1 to 0.2 |
| Sweden         | Both   | 1 to 4   | 1.4  | 0.8 to 1.9  | 1.6  | 0.9 to 2.3   | 0   | 0.0 to 0.0 |
| Sweden         | Both   | 5 to 9   | 3.9  | 2.5 to 5.3  | 2.4  | 1.8 to 3.3   | 0   | 0.0 to 0.0 |
| Sweden         | Both   | 10 to 14 | 7.6  | 5.4 to 9.9  | 6    | 4.4 to 7.9   | 0.1 | 0.0 to 0.1 |
| Sweden         | Both   | 15 to 19 | 12.3 | 8.8 to 15.6 | 10.9 | 7.9 to 14.5  | 0.1 | 0.1 to 0.2 |
| Switzerland    | Male   | 1 to 4   | 1.3  | 0.6 to 2.5  | 1    | 0.6 to 1.6   | 0   | 0.0 to 0.0 |
| Switzerland    | Male   | 5 to 9   | 3.7  | 1.6 to 6.8  | 2    | 1.3 to 2.8   | 0   | 0.0 to 0.0 |
| Switzerland    | Male   | 10 to 14 | 6.9  | 3.4 to 11.3 | 2.8  | 1.7 to 4.2   | 0   | 0.0 to 0.0 |
| Switzerland    | Male   | 15 to 19 | 10.7 | 5.5 to 17.6 | 7.7  | 4.7 to 11.3  | 0.1 | 0.0 to 0.1 |
| Switzerland    | Female | 1 to 4   | 0.9  | 0.5 to 1.7  | 1.4  | 0.7 to 2.5   | 0   | 0.0 to 0.0 |
| Switzerland    | Female | 5 to 9   | 2.6  | 1.3 to 4.9  | 1.6  | 1.0 to 2.4   | 0   | 0.0 to 0.0 |
| Switzerland    | Female | 10 to 14 | 5.1  | 2.8 to 8.8  | 4.7  | 3.2 to 7.0   | 0.1 | 0.0 to 0.1 |
| Switzerland    | Female | 15 to 19 | 8.3  | 4.2 to 15.0 | 7.9  | 4.8 to 11.9  | 0.1 | 0.1 to 0.1 |
| Switzerland    | Both   | 1 to 4   | 1.1  | 0.7 to 1.8  | 1.2  | 0.8 to 1.8   | 0   | 0.0 to 0.0 |
| Switzerland    | Both   | 5 to 9   | 3.2  | 1.9 to 4.9  | 1.8  | 1.3 to 2.4   | 0   | 0.0 to 0.0 |
| Switzerland    | Both   | 10 to 14 | 6    | 4.0 to 8.9  | 3.7  | 2.7 to 5.0   | 0   | 0.0 to 0.1 |
| Switzerland    | Both   | 15 to 19 | 9.6  | 6.2 to 14.3 | 7.8  | 5.3 to 10.6  | 0.1 | 0.1 to 0.1 |
| United Kingdom | Male   | 1 to 4   | 1.3  | 1.1 to 1.6  | 3.9  | 2.3 to 6.0   | 0   | 0.0 to 0.1 |
| United Kingdom | Male   | 5 to 9   | 3.8  | 3.2 to 4.6  | 3.6  | 2.6 to 4.7   | 0   | 0.0 to 0.0 |
| United Kingdom | Male   | 10 to 14 | 7.1  | 6.1 to 8.2  | 7.5  | 5.5 to 9.4   | 0.1 | 0.1 to 0.1 |
| United Kingdom | Male   | 15 to 19 | 11   | 9.2 to 12.9 | 17.1 | 12.3 to 22.1 | 0.2 | 0.2 to 0.3 |
| United Kingdom | Female | 1 to 4   | 1    | 0.8 to 1.2  | 4.6  | 3.0 to 6.7   | 0.1 | 0.0 to 0.1 |
| United Kingdom | Female | 5 to 9   | 2.8  | 2.2 to 3.5  | 3.6  | 2.7 to 5.0   | 0   | 0.0 to 0.1 |
| United Kingdom | Female | 10 to 14 | 5.4  | 4.5 to 6.5  | 9.4  | 6.8 to 12.1  | 0.1 | 0.1 to 0.1 |

|                |        |          |      |             |      |               |     |            |
|----------------|--------|----------|------|-------------|------|---------------|-----|------------|
| United Kingdom | Female | 15 to 19 | 8.7  | 7.3 to 10.4 | 16   | 11.1 to 19.8  | 0.2 | 0.1 to 0.3 |
| United Kingdom | Both   | 1 to 4   | 1.2  | 1.0 to 1.3  | 4.3  | 3.0 to 5.9    | 0   | 0.0 to 0.1 |
| United Kingdom | Both   | 5 to 9   | 3.3  | 2.9 to 3.8  | 3.6  | 2.9 to 4.5    | 0   | 0.0 to 0.0 |
| United Kingdom | Both   | 10 to 14 | 6.3  | 5.5 to 7.0  | 8.4  | 6.6 to 10.1   | 0.1 | 0.1 to 0.1 |
| United Kingdom | Both   | 15 to 19 | 9.8  | 8.6 to 11.2 | 16.5 | 12.8 to 19.7  | 0.2 | 0.2 to 0.3 |
| Argentina      | Male   | 1 to 4   | 1.3  | 0.9 to 1.9  | 34   | 18.2 to 58.0  | 0.4 | 0.2 to 0.7 |
| Argentina      | Male   | 5 to 9   | 3.7  | 2.6 to 5.2  | 27.8 | 18.2 to 39.4  | 0.3 | 0.2 to 0.5 |
| Argentina      | Male   | 10 to 14 | 7.2  | 5.0 to 9.7  | 41.1 | 28.5 to 57.9  | 0.5 | 0.4 to 0.8 |
| Argentina      | Male   | 15 to 19 | 11.5 | 7.8 to 15.4 | 94.1 | 62.7 to 137.9 | 1.3 | 0.9 to 2.0 |
| Argentina      | Female | 1 to 4   | 0.5  | 0.3 to 0.9  | 20.2 | 11.4 to 35.8  | 0.2 | 0.1 to 0.4 |
| Argentina      | Female | 5 to 9   | 1.6  | 0.9 to 2.5  | 21.4 | 14.2 to 32.2  | 0.3 | 0.2 to 0.4 |
| Argentina      | Female | 10 to 14 | 3.1  | 2.0 to 4.6  | 35.2 | 25.0 to 51.8  | 0.5 | 0.3 to 0.7 |
| Argentina      | Female | 15 to 19 | 5    | 3.1 to 7.0  | 59.7 | 39.1 to 83.4  | 0.9 | 0.6 to 1.2 |
| Argentina      | Both   | 1 to 4   | 0.9  | 0.6 to 1.3  | 27.3 | 16.2 to 43.2  | 0.3 | 0.2 to 0.5 |
| Argentina      | Both   | 5 to 9   | 2.7  | 1.9 to 3.5  | 24.6 | 17.4 to 33.5  | 0.3 | 0.2 to 0.4 |
| Argentina      | Both   | 10 to 14 | 5.2  | 3.8 to 6.6  | 38.2 | 29.2 to 49.8  | 0.5 | 0.4 to 0.7 |
| Argentina      | Both   | 15 to 19 | 8.3  | 6.1 to 10.5 | 77.2 | 57.3 to 101.4 | 1.1 | 0.8 to 1.4 |
| Chile          | Male   | 1 to 4   | 1.4  | 0.9 to 2.1  | 6    | 2.8 to 11.1   | 0.1 | 0.0 to 0.1 |
| Chile          | Male   | 5 to 9   | 3.8  | 2.6 to 5.3  | 10.3 | 6.7 to 16.2   | 0.1 | 0.1 to 0.2 |
| Chile          | Male   | 10 to 14 | 7.2  | 5.0 to 9.7  | 18.8 | 11.7 to 27.9  | 0.2 | 0.1 to 0.4 |
| Chile          | Male   | 15 to 19 | 11.3 | 7.6 to 15.6 | 47.9 | 30.9 to 68.8  | 0.7 | 0.4 to 1.0 |
| Chile          | Female | 1 to 4   | 0.6  | 0.3 to 0.9  | 3.2  | 1.6 to 5.6    | 0   | 0.0 to 0.1 |
| Chile          | Female | 5 to 9   | 1.7  | 1.0 to 2.5  | 5.2  | 3.1 to 8.1    | 0.1 | 0.0 to 0.1 |
| Chile          | Female | 10 to 14 | 3.2  | 2.1 to 4.5  | 12.5 | 7.8 to 17.7   | 0.2 | 0.1 to 0.2 |
| Chile          | Female | 15 to 19 | 5.1  | 3.2 to 7.3  | 28.9 | 18.8 to 41.5  | 0.4 | 0.3 to 0.6 |
| Chile          | Both   | 1 to 4   | 1    | 0.7 to 1.4  | 4.6  | 2.5 to 8.0    | 0.1 | 0.0 to 0.1 |
| Chile          | Both   | 5 to 9   | 2.8  | 2.1 to 3.7  | 7.8  | 5.2 to 11.5   | 0.1 | 0.1 to 0.1 |
| Chile          | Both   | 10 to 14 | 5.2  | 4.1 to 6.7  | 15.7 | 11.1 to 21.3  | 0.2 | 0.1 to 0.3 |
| Chile          | Both   | 15 to 19 | 8.2  | 6.2 to 10.6 | 38.6 | 27.7 to 51.4  | 0.5 | 0.4 to 0.7 |
| Uruguay        | Male   | 1 to 4   | 1.3  | 0.8 to 1.9  | 9.9  | 4.1 to 18.5   | 0.1 | 0.0 to 0.2 |
| Uruguay        | Male   | 5 to 9   | 3.6  | 2.3 to 5.2  | 8.8  | 5.0 to 14.1   | 0.1 | 0.1 to 0.2 |
| Uruguay        | Male   | 10 to 14 | 6.9  | 4.8 to 9.8  | 23.1 | 14.4 to 34.7  | 0.3 | 0.2 to 0.5 |
| Uruguay        | Male   | 15 to 19 | 11.1 | 7.3 to 15.1 | 51.8 | 31.4 to 80.6  | 0.7 | 0.4 to 1.1 |

|                     |        |          |      |              |      |               |     |            |
|---------------------|--------|----------|------|--------------|------|---------------|-----|------------|
| Uruguay             | Female | 1 to 4   | 0.5  | 0.3 to 0.8   | 5.6  | 2.3 to 10.3   | 0.1 | 0.0 to 0.1 |
| Uruguay             | Female | 5 to 9   | 1.5  | 1.0 to 2.3   | 10.2 | 5.9 to 16.6   | 0.1 | 0.1 to 0.2 |
| Uruguay             | Female | 10 to 14 | 3    | 2.0 to 4.4   | 19.2 | 12.1 to 29.8  | 0.3 | 0.2 to 0.4 |
| Uruguay             | Female | 15 to 19 | 4.8  | 3.0 to 7.0   | 33.7 | 21.0 to 50.0  | 0.5 | 0.3 to 0.7 |
| Uruguay             | Both   | 1 to 4   | 0.9  | 0.6 to 1.3   | 7.8  | 3.8 to 13.7   | 0.1 | 0.0 to 0.2 |
| Uruguay             | Both   | 5 to 9   | 2.6  | 1.9 to 3.5   | 9.5  | 6.0 to 14.5   | 0.1 | 0.1 to 0.2 |
| Uruguay             | Both   | 10 to 14 | 5    | 3.7 to 6.5   | 21.2 | 14.9 to 28.6  | 0.3 | 0.2 to 0.4 |
| Uruguay             | Both   | 15 to 19 | 8    | 5.8 to 10.2  | 42.9 | 29.9 to 59.4  | 0.6 | 0.4 to 0.8 |
| Canada              | Male   | 1 to 4   | 1.4  | 0.8 to 2.5   | 5.6  | 2.9 to 9.8    | 0.1 | 0.0 to 0.1 |
| Canada              | Male   | 5 to 9   | 4.3  | 2.5 to 7.3   | 3.1  | 1.9 to 4.4    | 0   | 0.0 to 0.0 |
| Canada              | Male   | 10 to 14 | 8.7  | 5.2 to 13.6  | 6.5  | 4.2 to 9.0    | 0.1 | 0.0 to 0.1 |
| Canada              | Male   | 15 to 19 | 14.5 | 7.8 to 22.7  | 11.8 | 7.3 to 16.9   | 0.1 | 0.1 to 0.2 |
| Canada              | Female | 1 to 4   | 0.9  | 0.4 to 1.6   | 5    | 2.7 to 8.3    | 0.1 | 0.0 to 0.1 |
| Canada              | Female | 5 to 9   | 3    | 1.5 to 5.0   | 3.7  | 2.3 to 5.5    | 0   | 0.0 to 0.1 |
| Canada              | Female | 10 to 14 | 6.2  | 3.6 to 9.7   | 6.5  | 4.1 to 9.1    | 0.1 | 0.0 to 0.1 |
| Canada              | Female | 15 to 19 | 10.2 | 5.9 to 16.3  | 12.2 | 7.5 to 17.3   | 0.2 | 0.1 to 0.2 |
| Canada              | Both   | 1 to 4   | 1.2  | 0.8 to 1.8   | 5.3  | 3.3 to 8.3    | 0.1 | 0.0 to 0.1 |
| Canada              | Both   | 5 to 9   | 3.7  | 2.6 to 5.4   | 3.4  | 2.4 to 4.5    | 0   | 0.0 to 0.0 |
| Canada              | Both   | 10 to 14 | 7.5  | 5.2 to 10.5  | 6.5  | 4.7 to 8.2    | 0.1 | 0.0 to 0.1 |
| Canada              | Both   | 15 to 19 | 12.4 | 8.1 to 17.9  | 12   | 8.4 to 15.3   | 0.1 | 0.1 to 0.2 |
| United States       | Male   | 1 to 4   | 2.9  | 1.8 to 4.2   | 19.2 | 9.9 to 32.3   | 0.2 | 0.1 to 0.4 |
| United States       | Male   | 5 to 9   | 9.8  | 5.8 to 13.7  | 11.8 | 7.8 to 16.7   | 0.1 | 0.1 to 0.2 |
| United States       | Male   | 10 to 14 | 21.4 | 14.7 to 29.2 | 17.8 | 12.1 to 24.8  | 0.2 | 0.1 to 0.3 |
| United States       | Male   | 15 to 19 | 37.6 | 25.9 to 51.6 | 30.5 | 20.4 to 43.6  | 0.4 | 0.2 to 0.5 |
| United States       | Female | 1 to 4   | 2    | 1.1 to 3.2   | 17.7 | 8.5 to 27.5   | 0.2 | 0.1 to 0.3 |
| United States       | Female | 5 to 9   | 8    | 5.0 to 12.0  | 10.6 | 6.4 to 14.8   | 0.1 | 0.1 to 0.2 |
| United States       | Female | 10 to 14 | 17.8 | 12.2 to 24.5 | 14.8 | 9.7 to 19.9   | 0.2 | 0.1 to 0.2 |
| United States       | Female | 15 to 19 | 30.7 | 19.9 to 44.3 | 23.7 | 14.1 to 32.6  | 0.3 | 0.1 to 0.4 |
| United States       | Both   | 1 to 4   | 2.5  | 1.7 to 3.3   | 18.5 | 10.4 to 27.5  | 0.2 | 0.1 to 0.3 |
| United States       | Both   | 5 to 9   | 8.9  | 6.6 to 11.6  | 11.2 | 8.0 to 14.9   | 0.1 | 0.1 to 0.2 |
| United States       | Both   | 10 to 14 | 19.7 | 15.5 to 25.0 | 16.4 | 12.2 to 20.9  | 0.2 | 0.1 to 0.2 |
| United States       | Both   | 15 to 19 | 34.2 | 25.9 to 43.6 | 27.2 | 19.5 to 35.1  | 0.3 | 0.2 to 0.4 |
| Antigua and Barbuda | Male   | 1 to 4   | 0.8  | 0.5 to 1.2   | 52.2 | 18.5 to 128.4 | 0.6 | 0.2 to 1.5 |

|                     |        |          |     |             |      |               |     |            |
|---------------------|--------|----------|-----|-------------|------|---------------|-----|------------|
| Antigua and Barbuda | Male   | 5 to 9   | 2.5 | 1.6 to 3.7  | 37.8 | 18.5 to 68.4  | 0.5 | 0.2 to 0.9 |
| Antigua and Barbuda | Male   | 10 to 14 | 4.9 | 3.3 to 7.2  | 50.4 | 27.1 to 86.9  | 0.7 | 0.4 to 1.2 |
| Antigua and Barbuda | Male   | 15 to 19 | 7.8 | 4.9 to 11.9 | 98.6 | 57.7 to 154.4 | 1.4 | 0.8 to 2.2 |
| Antigua and Barbuda | Female | 1 to 4   | 0.6 | 0.3 to 0.8  | 37.9 | 14.6 to 84.3  | 0.4 | 0.2 to 1.0 |
| Antigua and Barbuda | Female | 5 to 9   | 1.8 | 1.0 to 2.5  | 34.8 | 16.4 to 64.0  | 0.4 | 0.2 to 0.8 |
| Antigua and Barbuda | Female | 10 to 14 | 3.4 | 2.2 to 4.8  | 45.8 | 24.0 to 81.5  | 0.6 | 0.3 to 1.1 |
| Antigua and Barbuda | Female | 15 to 19 | 5.3 | 3.3 to 7.6  | 53.1 | 32.8 to 86.2  | 0.8 | 0.5 to 1.2 |
| Antigua and Barbuda | Both   | 1 to 4   | 0.7 | 0.5 to 0.9  | 45.1 | 17.9 to 101.2 | 0.5 | 0.2 to 1.2 |
| Antigua and Barbuda | Both   | 5 to 9   | 2.1 | 1.6 to 2.8  | 36.3 | 18.9 to 63.1  | 0.5 | 0.2 to 0.8 |
| Antigua and Barbuda | Both   | 10 to 14 | 4.2 | 3.1 to 5.4  | 48.1 | 27.7 to 76.7  | 0.6 | 0.4 to 1.0 |
| Antigua and Barbuda | Both   | 15 to 19 | 6.6 | 4.6 to 8.9  | 75.7 | 51.4 to 108.4 | 1.1 | 0.7 to 1.6 |
| The Bahamas         | Male   | 1 to 4   | 0.9 | 0.5 to 1.4  | 42.7 | 15.6 to 96.9  | 0.5 | 0.2 to 1.1 |
| The Bahamas         | Male   | 5 to 9   | 2.6 | 1.6 to 4.0  | 36.5 | 19.2 to 63.9  | 0.5 | 0.2 to 0.8 |
| The Bahamas         | Male   | 10 to 14 | 5.1 | 3.2 to 7.5  | 46   | 24.3 to 80.2  | 0.6 | 0.3 to 1.1 |
| The Bahamas         | Male   | 15 to 19 | 8   | 4.9 to 12.4 | 92.2 | 49.8 to 147.6 | 1.3 | 0.7 to 2.1 |
| The Bahamas         | Female | 1 to 4   | 0.6 | 0.3 to 0.9  | 22.1 | 8.4 to 48.2   | 0.3 | 0.1 to 0.6 |
| The Bahamas         | Female | 5 to 9   | 1.9 | 1.1 to 2.8  | 38.3 | 20.3 to 66.6  | 0.5 | 0.3 to 0.8 |
| The Bahamas         | Female | 10 to 14 | 3.7 | 2.3 to 5.5  | 48.8 | 27.8 to 79.6  | 0.6 | 0.4 to 1.1 |
| The Bahamas         | Female | 15 to 19 | 5.8 | 3.4 to 8.8  | 58.2 | 34.2 to 87.2  | 0.8 | 0.5 to 1.2 |
| The Bahamas         | Both   | 1 to 4   | 0.7 | 0.5 to 1.0  | 32.7 | 12.9 to 71.3  | 0.4 | 0.2 to 0.8 |
| The Bahamas         | Both   | 5 to 9   | 2.3 | 1.6 to 3.1  | 37.4 | 21.5 to 61.2  | 0.5 | 0.3 to 0.8 |
| The Bahamas         | Both   | 10 to 14 | 4.4 | 3.2 to 6.0  | 47.4 | 28.9 to 72.9  | 0.6 | 0.4 to 1.0 |
| The Bahamas         | Both   | 15 to 19 | 6.9 | 4.9 to 9.7  | 75.3 | 50.2 to 106.1 | 1.1 | 0.7 to 1.5 |
| Barbados            | Male   | 1 to 4   | 0.8 | 0.5 to 1.2  | 28.5 | 11.1 to 64.2  | 0.3 | 0.1 to 0.8 |
| Barbados            | Male   | 5 to 9   | 2.5 | 1.7 to 3.6  | 33.9 | 16.2 to 65.6  | 0.4 | 0.2 to 0.8 |
| Barbados            | Male   | 10 to 14 | 5   | 3.4 to 6.9  | 44.6 | 22.7 to 75.3  | 0.6 | 0.3 to 1.0 |
| Barbados            | Male   | 15 to 19 | 7.8 | 5.0 to 11.0 | 78.3 | 48.4 to 120.0 | 1.1 | 0.7 to 1.7 |
| Barbados            | Female | 1 to 4   | 0.6 | 0.4 to 0.9  | 23.3 | 9.6 to 55.6   | 0.3 | 0.1 to 0.7 |
| Barbados            | Female | 5 to 9   | 1.9 | 1.2 to 2.7  | 33.4 | 17.1 to 61.0  | 0.4 | 0.2 to 0.8 |
| Barbados            | Female | 10 to 14 | 3.7 | 2.4 to 5.3  | 45.2 | 24.8 to 75.7  | 0.6 | 0.3 to 1.0 |
| Barbados            | Female | 15 to 19 | 5.7 | 3.5 to 8.9  | 52.3 | 31.1 to 81.4  | 0.7 | 0.4 to 1.2 |
| Barbados            | Both   | 1 to 4   | 0.7 | 0.6 to 1.0  | 26   | 11.2 to 56.3  | 0.3 | 0.1 to 0.7 |
| Barbados            | Both   | 5 to 9   | 2.2 | 1.7 to 2.8  | 33.7 | 18.7 to 59.2  | 0.4 | 0.2 to 0.7 |

|          |        |          |     |             |       |               |     |            |
|----------|--------|----------|-----|-------------|-------|---------------|-----|------------|
| Barbados | Both   | 10 to 14 | 4.3 | 3.3 to 5.4  | 44.9  | 26.4 to 70.8  | 0.6 | 0.3 to 0.9 |
| Barbados | Both   | 15 to 19 | 6.8 | 4.9 to 8.9  | 66    | 45.7 to 89.8  | 0.9 | 0.6 to 1.3 |
| Belize   | Male   | 1 to 4   | 0.9 | 0.5 to 1.4  | 53.1  | 20.9 to 114.7 | 0.6 | 0.2 to 1.4 |
| Belize   | Male   | 5 to 9   | 2.7 | 1.7 to 4.4  | 43.2  | 23.5 to 72.0  | 0.5 | 0.3 to 0.9 |
| Belize   | Male   | 10 to 14 | 5.2 | 3.3 to 8.2  | 51.1  | 29.1 to 85.3  | 0.7 | 0.4 to 1.1 |
| Belize   | Male   | 15 to 19 | 8.1 | 5.1 to 12.4 | 100   | 61.1 to 156.5 | 1.4 | 0.9 to 2.2 |
| Belize   | Female | 1 to 4   | 0.6 | 0.4 to 0.9  | 45.1  | 19.4 to 93.1  | 0.5 | 0.2 to 1.1 |
| Belize   | Female | 5 to 9   | 1.9 | 1.1 to 2.8  | 44.2  | 25.0 to 77.0  | 0.6 | 0.3 to 1.0 |
| Belize   | Female | 10 to 14 | 3.7 | 2.3 to 5.5  | 59.8  | 37.1 to 92.0  | 0.8 | 0.5 to 1.2 |
| Belize   | Female | 15 to 19 | 5.7 | 3.4 to 9.0  | 72.6  | 43.2 to 114.0 | 1   | 0.6 to 1.6 |
| Belize   | Both   | 1 to 4   | 0.8 | 0.5 to 1.1  | 49.2  | 22.1 to 98.1  | 0.6 | 0.3 to 1.2 |
| Belize   | Both   | 5 to 9   | 2.3 | 1.6 to 3.5  | 43.7  | 26.0 to 68.7  | 0.5 | 0.3 to 0.9 |
| Belize   | Both   | 10 to 14 | 4.5 | 3.1 to 6.3  | 55.4  | 36.2 to 83.0  | 0.7 | 0.5 to 1.1 |
| Belize   | Both   | 15 to 19 | 6.9 | 4.6 to 9.8  | 86.4  | 59.9 to 119.6 | 1.2 | 0.8 to 1.7 |
| Cuba     | Male   | 1 to 4   | 0.8 | 0.4 to 1.2  | 3.2   | 1.5 to 5.8    | 0   | 0.0 to 0.1 |
| Cuba     | Male   | 5 to 9   | 2.4 | 1.4 to 3.8  | 9.8   | 6.4 to 14.4   | 0.1 | 0.1 to 0.2 |
| Cuba     | Male   | 10 to 14 | 4.8 | 3.1 to 7.0  | 17.6  | 10.9 to 26.8  | 0.2 | 0.1 to 0.4 |
| Cuba     | Male   | 15 to 19 | 7.6 | 4.8 to 11.1 | 26.3  | 16.4 to 39.3  | 0.4 | 0.2 to 0.6 |
| Cuba     | Female | 1 to 4   | 0.6 | 0.4 to 0.8  | 2.4   | 1.3 to 3.9    | 0   | 0.0 to 0.0 |
| Cuba     | Female | 5 to 9   | 1.8 | 1.2 to 2.6  | 5.2   | 3.0 to 7.8    | 0.1 | 0.0 to 0.1 |
| Cuba     | Female | 10 to 14 | 3.5 | 2.4 to 4.9  | 10.9  | 6.2 to 15.9   | 0.1 | 0.1 to 0.2 |
| Cuba     | Female | 15 to 19 | 5.3 | 3.4 to 7.9  | 18.8  | 9.3 to 27.9   | 0.3 | 0.1 to 0.4 |
| Cuba     | Both   | 1 to 4   | 0.7 | 0.5 to 0.9  | 2.8   | 1.6 to 4.3    | 0   | 0.0 to 0.0 |
| Cuba     | Both   | 5 to 9   | 2.1 | 1.5 to 2.8  | 7.6   | 5.5 to 10.4   | 0.1 | 0.1 to 0.1 |
| Cuba     | Both   | 10 to 14 | 4.2 | 3.1 to 5.4  | 14.3  | 10.4 to 19.0  | 0.2 | 0.1 to 0.2 |
| Cuba     | Both   | 15 to 19 | 6.5 | 4.7 to 8.8  | 22.7  | 15.2 to 30.8  | 0.3 | 0.2 to 0.4 |
| Dominica | Male   | 1 to 4   | 0.8 | 0.5 to 1.3  | 65.2  | 25.2 to 149.2 | 0.8 | 0.3 to 1.8 |
| Dominica | Male   | 5 to 9   | 2.5 | 1.4 to 3.8  | 45.4  | 24.0 to 81.9  | 0.6 | 0.3 to 1.0 |
| Dominica | Male   | 10 to 14 | 4.8 | 3.0 to 7.4  | 57.2  | 30.9 to 92.7  | 0.8 | 0.4 to 1.2 |
| Dominica | Male   | 15 to 19 | 7.4 | 4.6 to 11.6 | 101.8 | 56.2 to 166.4 | 1.5 | 0.8 to 2.4 |
| Dominica | Female | 1 to 4   | 0.6 | 0.4 to 0.9  | 53.7  | 21.7 to 122.5 | 0.6 | 0.3 to 1.5 |
| Dominica | Female | 5 to 9   | 1.9 | 1.2 to 2.8  | 43.1  | 21.4 to 88.1  | 0.5 | 0.3 to 1.1 |
| Dominica | Female | 10 to 14 | 3.6 | 2.4 to 5.0  | 52.1  | 28.8 to 88.6  | 0.7 | 0.4 to 1.2 |

|                    |        |          |     |             |       |               |     |            |
|--------------------|--------|----------|-----|-------------|-------|---------------|-----|------------|
| Dominica           | Female | 15 to 19 | 5.5 | 3.4 to 8.1  | 52.3  | 31.8 to 78.4  | 0.7 | 0.4 to 1.1 |
| Dominica           | Both   | 1 to 4   | 0.7 | 0.5 to 1.0  | 59.6  | 24.7 to 131.7 | 0.7 | 0.3 to 1.6 |
| Dominica           | Both   | 5 to 9   | 2.2 | 1.6 to 3.1  | 44.3  | 24.0 to 80.8  | 0.6 | 0.3 to 1.0 |
| Dominica           | Both   | 10 to 14 | 4.2 | 3.1 to 5.7  | 54.7  | 32.4 to 83.3  | 0.7 | 0.4 to 1.1 |
| Dominica           | Both   | 15 to 19 | 6.4 | 4.6 to 9.2  | 77.4  | 51.7 to 111.8 | 1.1 | 0.7 to 1.6 |
| Dominican Republic | Male   | 1 to 4   | 0.8 | 0.5 to 1.2  | 62.3  | 30.5 to 105.1 | 0.7 | 0.4 to 1.2 |
| Dominican Republic | Male   | 5 to 9   | 2.5 | 1.5 to 3.6  | 44.5  | 28.7 to 63.5  | 0.6 | 0.4 to 0.8 |
| Dominican Republic | Male   | 10 to 14 | 4.8 | 3.1 to 6.9  | 51.5  | 33.3 to 75.6  | 0.7 | 0.4 to 1.0 |
| Dominican Republic | Male   | 15 to 19 | 7.5 | 4.9 to 11.2 | 47.4  | 26.6 to 75.7  | 0.7 | 0.4 to 1.1 |
| Dominican Republic | Female | 1 to 4   | 0.7 | 0.4 to 1.1  | 50.8  | 24.6 to 81.5  | 0.6 | 0.3 to 1.0 |
| Dominican Republic | Female | 5 to 9   | 2   | 1.2 to 3.3  | 32    | 18.0 to 48.2  | 0.4 | 0.2 to 0.6 |
| Dominican Republic | Female | 10 to 14 | 3.7 | 2.5 to 5.6  | 46.1  | 28.8 to 65.5  | 0.6 | 0.4 to 0.9 |
| Dominican Republic | Female | 15 to 19 | 5.5 | 3.6 to 8.1  | 61.1  | 38.3 to 97.8  | 0.9 | 0.5 to 1.4 |
| Dominican Republic | Both   | 1 to 4   | 0.7 | 0.5 to 1.0  | 56.7  | 32.4 to 88.1  | 0.7 | 0.4 to 1.0 |
| Dominican Republic | Both   | 5 to 9   | 2.2 | 1.5 to 3.1  | 38.4  | 25.6 to 51.9  | 0.5 | 0.3 to 0.7 |
| Dominican Republic | Both   | 10 to 14 | 4.3 | 3.2 to 5.5  | 48.8  | 35.4 to 64.0  | 0.6 | 0.5 to 0.9 |
| Dominican Republic | Both   | 15 to 19 | 6.5 | 4.8 to 8.4  | 54.2  | 37.9 to 79.0  | 0.8 | 0.5 to 1.1 |
| Grenada            | Male   | 1 to 4   | 0.8 | 0.5 to 1.3  | 37.1  | 14.1 to 81.4  | 0.4 | 0.2 to 1.0 |
| Grenada            | Male   | 5 to 9   | 2.6 | 1.6 to 4.1  | 33.4  | 18.0 to 56.8  | 0.4 | 0.2 to 0.7 |
| Grenada            | Male   | 10 to 14 | 5   | 3.2 to 7.5  | 43.6  | 25.0 to 72.1  | 0.6 | 0.3 to 1.0 |
| Grenada            | Male   | 15 to 19 | 7.8 | 4.8 to 11.9 | 112.6 | 72.1 to 172.0 | 1.6 | 1.0 to 2.5 |
| Grenada            | Female | 1 to 4   | 0.6 | 0.4 to 1.0  | 29.3  | 12.1 to 60.7  | 0.3 | 0.1 to 0.7 |
| Grenada            | Female | 5 to 9   | 1.9 | 1.1 to 3.0  | 34.2  | 18.0 to 59.5  | 0.4 | 0.2 to 0.7 |
| Grenada            | Female | 10 to 14 | 3.6 | 2.3 to 5.3  | 50.2  | 32.1 to 78.7  | 0.7 | 0.4 to 1.1 |
| Grenada            | Female | 15 to 19 | 5.5 | 3.4 to 8.2  | 69    | 43.4 to 104.8 | 1   | 0.6 to 1.5 |
| Grenada            | Both   | 1 to 4   | 0.7 | 0.5 to 1.0  | 33.3  | 14.0 to 69.4  | 0.4 | 0.2 to 0.8 |
| Grenada            | Both   | 5 to 9   | 2.3 | 1.6 to 3.1  | 33.8  | 19.6 to 53.9  | 0.4 | 0.2 to 0.7 |
| Grenada            | Both   | 10 to 14 | 4.3 | 3.1 to 5.7  | 46.8  | 30.8 to 69.2  | 0.6 | 0.4 to 0.9 |
| Grenada            | Both   | 15 to 19 | 6.7 | 4.7 to 9.0  | 91.1  | 64.3 to 127.2 | 1.3 | 0.9 to 1.8 |
| Guyana             | Male   | 1 to 4   | 0.8 | 0.4 to 1.2  | 135.4 | 49.7 to 323.9 | 1.6 | 0.6 to 3.8 |
| Guyana             | Male   | 5 to 9   | 2.5 | 1.4 to 3.6  | 84    | 48.6 to 135.5 | 1.1 | 0.6 to 1.7 |
| Guyana             | Male   | 10 to 14 | 4.8 | 3.1 to 6.9  | 82.5  | 49.5 to 135.4 | 1.1 | 0.7 to 1.8 |
| Guyana             | Male   | 15 to 19 | 7.6 | 4.5 to 11.3 | 128   | 74.6 to 203.9 | 1.8 | 1.1 to 2.9 |

|             |        |          |     |             |       |                 |     |             |
|-------------|--------|----------|-----|-------------|-------|-----------------|-----|-------------|
| Guyana      | Female | 1 to 4   | 0.6 | 0.4 to 1.0  | 109.6 | 39.6 to 269.8   | 1.3 | 0.5 to 3.2  |
| Guyana      | Female | 5 to 9   | 1.9 | 1.2 to 2.9  | 74.9  | 37.1 to 146.4   | 0.9 | 0.5 to 1.8  |
| Guyana      | Female | 10 to 14 | 3.7 | 2.3 to 5.4  | 95.7  | 54.2 to 156.7   | 1.3 | 0.7 to 2.1  |
| Guyana      | Female | 15 to 19 | 5.8 | 3.4 to 8.9  | 102.6 | 57.8 to 163.0   | 1.5 | 0.8 to 2.3  |
| Guyana      | Both   | 1 to 4   | 0.7 | 0.5 to 1.0  | 122.8 | 48.9 to 297.3   | 1.5 | 0.6 to 3.5  |
| Guyana      | Both   | 5 to 9   | 2.2 | 1.5 to 2.9  | 79.7  | 47.0 to 135.4   | 1   | 0.6 to 1.7  |
| Guyana      | Both   | 10 to 14 | 4.3 | 3.0 to 5.7  | 88.5  | 57.8 to 138.7   | 1.2 | 0.8 to 1.9  |
| Guyana      | Both   | 15 to 19 | 6.7 | 4.7 to 9.0  | 116.1 | 78.7 to 164.1   | 1.7 | 1.1 to 2.4  |
| Haiti       | Male   | 1 to 4   | 0.8 | 0.5 to 1.2  | 619   | 254.1 to 1199.2 | 7.3 | 3.0 to 14.2 |
| Haiti       | Male   | 5 to 9   | 2.5 | 1.5 to 3.7  | 191.1 | 95.7 to 331.7   | 2.4 | 1.2 to 4.2  |
| Haiti       | Male   | 10 to 14 | 4.9 | 3.2 to 7.0  | 158.7 | 90.6 to 250.1   | 2.1 | 1.2 to 3.4  |
| Haiti       | Male   | 15 to 19 | 7.7 | 4.8 to 11.5 | 143.1 | 75.7 to 238.3   | 2   | 1.1 to 3.4  |
| Haiti       | Female | 1 to 4   | 0.6 | 0.4 to 0.9  | 591.1 | 282.2 to 1088.4 | 7   | 3.3 to 12.9 |
| Haiti       | Female | 5 to 9   | 1.9 | 1.2 to 2.8  | 184.8 | 98.6 to 312.3   | 2.3 | 1.2 to 3.9  |
| Haiti       | Female | 10 to 14 | 3.6 | 2.3 to 5.3  | 130.3 | 67.8 to 222.8   | 1.7 | 0.9 to 3.0  |
| Haiti       | Female | 15 to 19 | 5.6 | 3.5 to 8.2  | 144   | 76.9 to 240.8   | 2.1 | 1.1 to 3.5  |
| Haiti       | Both   | 1 to 4   | 0.7 | 0.5 to 1.0  | 605.3 | 337.8 to 979.1  | 7.2 | 4.0 to 11.6 |
| Haiti       | Both   | 5 to 9   | 2.2 | 1.6 to 3.0  | 188   | 116.7 to 281.8  | 2.4 | 1.5 to 3.5  |
| Haiti       | Both   | 10 to 14 | 4.3 | 3.1 to 5.7  | 144.7 | 97.1 to 209.1   | 1.9 | 1.3 to 2.8  |
| Haiti       | Both   | 15 to 19 | 6.7 | 4.8 to 8.7  | 143.6 | 90.3 to 206.3   | 2.1 | 1.3 to 3.0  |
| Jamaica     | Male   | 1 to 4   | 0.8 | 0.5 to 1.2  | 84.1  | 31.0 to 199.0   | 1   | 0.4 to 2.4  |
| Jamaica     | Male   | 5 to 9   | 2.5 | 1.5 to 3.7  | 35.3  | 16.2 to 68.7    | 0.4 | 0.2 to 0.9  |
| Jamaica     | Male   | 10 to 14 | 4.9 | 3.1 to 7.3  | 42.1  | 21.8 to 73.2    | 0.6 | 0.3 to 1.0  |
| Jamaica     | Male   | 15 to 19 | 7.8 | 4.6 to 12.2 | 71.3  | 40.6 to 118.8   | 1   | 0.6 to 1.7  |
| Jamaica     | Female | 1 to 4   | 0.6 | 0.4 to 0.9  | 72.6  | 28.3 to 173.4   | 0.9 | 0.3 to 2.1  |
| Jamaica     | Female | 5 to 9   | 1.9 | 1.1 to 2.7  | 36.7  | 18.6 to 69.8    | 0.5 | 0.2 to 0.9  |
| Jamaica     | Female | 10 to 14 | 3.6 | 2.1 to 5.3  | 46    | 24.3 to 82.4    | 0.6 | 0.3 to 1.1  |
| Jamaica     | Female | 15 to 19 | 5.5 | 3.2 to 8.5  | 55.3  | 32.0 to 103.5   | 0.8 | 0.5 to 1.5  |
| Jamaica     | Both   | 1 to 4   | 0.7 | 0.5 to 0.9  | 78.5  | 32.2 to 178.1   | 0.9 | 0.4 to 2.1  |
| Jamaica     | Both   | 5 to 9   | 2.2 | 1.6 to 2.9  | 35.9  | 18.5 to 65.7    | 0.4 | 0.2 to 0.8  |
| Jamaica     | Both   | 10 to 14 | 4.2 | 3.0 to 5.7  | 44    | 25.9 to 70.9    | 0.6 | 0.3 to 0.9  |
| Jamaica     | Both   | 15 to 19 | 6.7 | 4.3 to 9.6  | 63.4  | 43.0 to 96.3    | 0.9 | 0.6 to 1.4  |
| Saint Lucia | Male   | 1 to 4   | 0.8 | 0.5 to 1.3  | 53.2  | 20.4 to 117.1   | 0.6 | 0.2 to 1.4  |

|                             |        |          |     |             |       |               |     |            |
|-----------------------------|--------|----------|-----|-------------|-------|---------------|-----|------------|
| Saint Lucia                 | Male   | 5 to 9   | 2.5 | 1.6 to 3.7  | 37.3  | 19.0 to 68.4  | 0.5 | 0.2 to 0.9 |
| Saint Lucia                 | Male   | 10 to 14 | 5   | 3.4 to 7.1  | 48.5  | 24.8 to 82.7  | 0.6 | 0.3 to 1.1 |
| Saint Lucia                 | Male   | 15 to 19 | 7.9 | 5.1 to 11.4 | 84.6  | 49.0 to 135.0 | 1.2 | 0.7 to 1.9 |
| Saint Lucia                 | Female | 1 to 4   | 0.6 | 0.4 to 1.0  | 43.3  | 16.3 to 95.8  | 0.5 | 0.2 to 1.1 |
| Saint Lucia                 | Female | 5 to 9   | 1.9 | 1.2 to 2.9  | 37.3  | 19.4 to 64.8  | 0.5 | 0.2 to 0.8 |
| Saint Lucia                 | Female | 10 to 14 | 3.7 | 2.5 to 5.4  | 48.4  | 25.9 to 80.4  | 0.6 | 0.3 to 1.1 |
| Saint Lucia                 | Female | 15 to 19 | 5.7 | 3.7 to 8.7  | 56.6  | 33.1 to 87.5  | 0.8 | 0.5 to 1.2 |
| Saint Lucia                 | Both   | 1 to 4   | 0.7 | 0.5 to 1.0  | 48.3  | 19.7 to 102.7 | 0.6 | 0.2 to 1.2 |
| Saint Lucia                 | Both   | 5 to 9   | 2.2 | 1.6 to 3.0  | 37.3  | 20.3 to 64.4  | 0.5 | 0.3 to 0.8 |
| Saint Lucia                 | Both   | 10 to 14 | 4.3 | 3.3 to 5.5  | 48.5  | 26.8 to 76.4  | 0.6 | 0.4 to 1.0 |
| Saint Lucia                 | Both   | 15 to 19 | 6.8 | 5.0 to 9.0  | 70.6  | 46.9 to 100.5 | 1   | 0.7 to 1.4 |
| Saint Vincent and the Grena | Male   | 1 to 4   | 0.8 | 0.5 to 1.2  | 68.4  | 27.1 to 151.7 | 0.8 | 0.3 to 1.8 |
| Saint Vincent and the Grena | Male   | 5 to 9   | 2.5 | 1.6 to 3.6  | 46.1  | 23.9 to 85.0  | 0.6 | 0.3 to 1.1 |
| Saint Vincent and the Grena | Male   | 10 to 14 | 4.9 | 3.3 to 7.0  | 59.1  | 32.9 to 96.4  | 0.8 | 0.4 to 1.3 |
| Saint Vincent and the Grena | Male   | 15 to 19 | 7.7 | 4.7 to 11.3 | 98.6  | 59.0 to 151.0 | 1.4 | 0.8 to 2.2 |
| Saint Vincent and the Grena | Female | 1 to 4   | 0.6 | 0.3 to 0.8  | 56.1  | 21.3 to 123.8 | 0.7 | 0.3 to 1.5 |
| Saint Vincent and the Grena | Female | 5 to 9   | 1.8 | 1.1 to 2.7  | 45.4  | 25.9 to 78.9  | 0.6 | 0.3 to 1.0 |
| Saint Vincent and the Grena | Female | 10 to 14 | 3.5 | 2.2 to 5.3  | 56.2  | 34.1 to 87.9  | 0.7 | 0.4 to 1.2 |
| Saint Vincent and the Grena | Female | 15 to 19 | 5.6 | 3.1 to 8.6  | 64.2  | 38.6 to 98.1  | 0.9 | 0.5 to 1.4 |
| Saint Vincent and the Grena | Both   | 1 to 4   | 0.7 | 0.5 to 0.9  | 62.4  | 25.7 to 134.9 | 0.7 | 0.3 to 1.6 |
| Saint Vincent and the Grena | Both   | 5 to 9   | 2.2 | 1.6 to 2.8  | 45.8  | 26.7 to 78.5  | 0.6 | 0.3 to 1.0 |
| Saint Vincent and the Grena | Both   | 10 to 14 | 4.2 | 3.2 to 5.6  | 57.7  | 35.9 to 86.8  | 0.8 | 0.5 to 1.2 |
| Saint Vincent and the Grena | Both   | 15 to 19 | 6.6 | 4.7 to 9.3  | 81.6  | 56.5 to 113.2 | 1.2 | 0.8 to 1.6 |
| Suriname                    | Male   | 1 to 4   | 0.8 | 0.5 to 1.2  | 127.2 | 66.8 to 225.0 | 1.5 | 0.8 to 2.7 |
| Suriname                    | Male   | 5 to 9   | 2.6 | 1.6 to 3.7  | 75.1  | 48.7 to 108.9 | 0.9 | 0.6 to 1.4 |
| Suriname                    | Male   | 10 to 14 | 5   | 3.2 to 7.2  | 81.9  | 52.9 to 119.3 | 1.1 | 0.7 to 1.6 |
| Suriname                    | Male   | 15 to 19 | 7.9 | 4.9 to 11.8 | 121.9 | 71.3 to 194.5 | 1.7 | 1.0 to 2.8 |
| Suriname                    | Female | 1 to 4   | 0.6 | 0.4 to 0.9  | 102.6 | 59.9 to 172.4 | 1.2 | 0.7 to 2.0 |
| Suriname                    | Female | 5 to 9   | 1.8 | 1.2 to 2.6  | 66.9  | 43.7 to 106.0 | 0.8 | 0.5 to 1.3 |
| Suriname                    | Female | 10 to 14 | 3.5 | 2.4 to 5.1  | 73.3  | 47.8 to 111.5 | 1   | 0.6 to 1.5 |
| Suriname                    | Female | 15 to 19 | 5.4 | 3.5 to 7.9  | 73.1  | 44.1 to 111.4 | 1   | 0.6 to 1.6 |
| Suriname                    | Both   | 1 to 4   | 0.7 | 0.5 to 0.9  | 115.3 | 69.7 to 180.8 | 1.4 | 0.8 to 2.1 |
| Suriname                    | Both   | 5 to 9   | 2.2 | 1.6 to 2.9  | 71.1  | 52.0 to 96.3  | 0.9 | 0.6 to 1.2 |

|                     |        |          |     |             |       |                |     |            |
|---------------------|--------|----------|-----|-------------|-------|----------------|-----|------------|
| Suriname            | Both   | 10 to 14 | 4.3 | 3.1 to 5.5  | 77.6  | 56.9 to 104.5  | 1   | 0.8 to 1.4 |
| Suriname            | Both   | 15 to 19 | 6.7 | 4.8 to 9.0  | 97.8  | 67.4 to 140.1  | 1.4 | 1.0 to 2.0 |
| Trinidad and Tobago | Male   | 1 to 4   | 0.8 | 0.5 to 1.4  | 60.8  | 24.1 to 132.7  | 0.7 | 0.3 to 1.6 |
| Trinidad and Tobago | Male   | 5 to 9   | 2.5 | 1.5 to 4.0  | 37.8  | 17.1 to 77.5   | 0.5 | 0.2 to 1.0 |
| Trinidad and Tobago | Male   | 10 to 14 | 4.9 | 3.1 to 7.6  | 49    | 27.0 to 82.2   | 0.7 | 0.4 to 1.1 |
| Trinidad and Tobago | Male   | 15 to 19 | 7.7 | 4.4 to 11.7 | 87.3  | 51.4 to 137.7  | 1.2 | 0.7 to 2.0 |
| Trinidad and Tobago | Female | 1 to 4   | 0.6 | 0.3 to 0.9  | 49.2  | 19.5 to 116.0  | 0.6 | 0.2 to 1.4 |
| Trinidad and Tobago | Female | 5 to 9   | 1.9 | 1.1 to 2.8  | 33.9  | 15.5 to 67.8   | 0.4 | 0.2 to 0.9 |
| Trinidad and Tobago | Female | 10 to 14 | 3.6 | 2.3 to 5.1  | 50.5  | 30.2 to 82.9   | 0.7 | 0.4 to 1.1 |
| Trinidad and Tobago | Female | 15 to 19 | 5.5 | 3.6 to 8.2  | 51    | 31.7 to 80.9   | 0.7 | 0.4 to 1.2 |
| Trinidad and Tobago | Both   | 1 to 4   | 0.7 | 0.5 to 1.1  | 55.1  | 22.9 to 121.3  | 0.7 | 0.3 to 1.4 |
| Trinidad and Tobago | Both   | 5 to 9   | 2.2 | 1.4 to 3.1  | 35.9  | 17.0 to 69.9   | 0.4 | 0.2 to 0.9 |
| Trinidad and Tobago | Both   | 10 to 14 | 4.2 | 3.1 to 5.8  | 49.8  | 31.6 to 78.2   | 0.7 | 0.4 to 1.0 |
| Trinidad and Tobago | Both   | 15 to 19 | 6.6 | 4.6 to 9.1  | 69.3  | 46.7 to 99.2   | 1   | 0.7 to 1.4 |
| Bolivia             | Male   | 1 to 4   | 0.8 | 0.5 to 1.1  | 219.9 | 94.4 to 447.9  | 2.6 | 1.1 to 5.3 |
| Bolivia             | Male   | 5 to 9   | 2.3 | 1.6 to 3.2  | 65.6  | 31.8 to 116.9  | 0.8 | 0.4 to 1.5 |
| Bolivia             | Male   | 10 to 14 | 4.3 | 2.9 to 5.9  | 85.5  | 46.1 to 140.4  | 1.1 | 0.6 to 1.9 |
| Bolivia             | Male   | 15 to 19 | 6.4 | 3.9 to 9.2  | 92.7  | 46.2 to 154.1  | 1.3 | 0.6 to 2.2 |
| Bolivia             | Female | 1 to 4   | 0.5 | 0.3 to 0.8  | 179.9 | 71.3 to 400.7  | 2.1 | 0.8 to 4.7 |
| Bolivia             | Female | 5 to 9   | 1.5 | 1.0 to 2.2  | 54.7  | 27.4 to 99.0   | 0.7 | 0.3 to 1.2 |
| Bolivia             | Female | 10 to 14 | 2.7 | 1.8 to 3.8  | 74.9  | 38.3 to 128.3  | 1   | 0.5 to 1.7 |
| Bolivia             | Female | 15 to 19 | 3.8 | 2.3 to 5.7  | 68.6  | 31.0 to 121.8  | 1   | 0.4 to 1.7 |
| Bolivia             | Both   | 1 to 4   | 0.7 | 0.5 to 0.9  | 200.3 | 109.9 to 365.8 | 2.4 | 1.3 to 4.3 |
| Bolivia             | Both   | 5 to 9   | 1.9 | 1.5 to 2.5  | 60.3  | 34.5 to 93.9   | 0.8 | 0.4 to 1.2 |
| Bolivia             | Both   | 10 to 14 | 3.5 | 2.7 to 4.6  | 80.3  | 50.0 to 114.0  | 1.1 | 0.7 to 1.5 |
| Bolivia             | Both   | 15 to 19 | 5.1 | 3.8 to 6.8  | 80.9  | 50.4 to 120.8  | 1.2 | 0.7 to 1.7 |
| Ecuador             | Male   | 1 to 4   | 0.8 | 0.5 to 1.1  | 36.4  | 19.6 to 61.3   | 0.4 | 0.2 to 0.7 |
| Ecuador             | Male   | 5 to 9   | 2.3 | 1.5 to 3.2  | 30.2  | 19.9 to 43.3   | 0.4 | 0.2 to 0.5 |
| Ecuador             | Male   | 10 to 14 | 4.3 | 2.8 to 6.2  | 74.3  | 50.4 to 107.0  | 1   | 0.7 to 1.4 |
| Ecuador             | Male   | 15 to 19 | 6.5 | 4.0 to 9.7  | 161.7 | 97.2 to 247.3  | 2.3 | 1.4 to 3.6 |
| Ecuador             | Female | 1 to 4   | 0.6 | 0.3 to 0.8  | 21.9  | 11.2 to 34.9   | 0.3 | 0.1 to 0.4 |
| Ecuador             | Female | 5 to 9   | 1.6 | 1.0 to 2.2  | 28    | 16.9 to 40.1   | 0.3 | 0.2 to 0.5 |
| Ecuador             | Female | 10 to 14 | 2.7 | 1.8 to 3.9  | 62.4  | 40.9 to 90.9   | 0.8 | 0.5 to 1.2 |

|            |        |          |      |             |       |               |     |            |
|------------|--------|----------|------|-------------|-------|---------------|-----|------------|
| Ecuador    | Female | 15 to 19 | 3.9  | 2.4 to 5.7  | 117.3 | 71.1 to 175.6 | 1.7 | 1.0 to 2.5 |
| Ecuador    | Both   | 1 to 4   | 0.7  | 0.5 to 0.9  | 29.4  | 18.1 to 44.3  | 0.3 | 0.2 to 0.5 |
| Ecuador    | Both   | 5 to 9   | 1.9  | 1.4 to 2.5  | 29.1  | 21.3 to 37.7  | 0.4 | 0.3 to 0.5 |
| Ecuador    | Both   | 10 to 14 | 3.5  | 2.6 to 4.6  | 68.5  | 50.2 to 89.4  | 0.9 | 0.7 to 1.2 |
| Ecuador    | Both   | 15 to 19 | 5.2  | 3.7 to 7.0  | 139.9 | 98.7 to 191.6 | 2   | 1.4 to 2.8 |
| Peru       | Male   | 1 to 4   | 0.8  | 0.4 to 1.5  | 30.9  | 16.3 to 51.6  | 0.4 | 0.2 to 0.6 |
| Peru       | Male   | 5 to 9   | 2.2  | 1.3 to 4.0  | 48.6  | 31.4 to 72.4  | 0.6 | 0.4 to 0.9 |
| Peru       | Male   | 10 to 14 | 4.1  | 2.6 to 6.4  | 82.3  | 55.5 to 118.9 | 1.1 | 0.7 to 1.6 |
| Peru       | Male   | 15 to 19 | 6.3  | 3.8 to 9.2  | 127.8 | 71.8 to 208.1 | 1.8 | 1.0 to 3.0 |
| Peru       | Female | 1 to 4   | 0.6  | 0.3 to 0.9  | 18.1  | 6.7 to 30.0   | 0.2 | 0.1 to 0.4 |
| Peru       | Female | 5 to 9   | 1.5  | 0.9 to 2.3  | 28.2  | 14.1 to 41.1  | 0.4 | 0.2 to 0.5 |
| Peru       | Female | 10 to 14 | 2.7  | 1.7 to 3.9  | 53.9  | 29.7 to 76.2  | 0.7 | 0.4 to 1.0 |
| Peru       | Female | 15 to 19 | 3.8  | 2.4 to 5.7  | 89.5  | 43.3 to 129.0 | 1.3 | 0.6 to 1.9 |
| Peru       | Both   | 1 to 4   | 0.7  | 0.4 to 1.0  | 24.6  | 13.7 to 38.0  | 0.3 | 0.2 to 0.4 |
| Peru       | Both   | 5 to 9   | 1.9  | 1.3 to 2.8  | 38.6  | 26.4 to 51.3  | 0.5 | 0.3 to 0.6 |
| Peru       | Both   | 10 to 14 | 3.4  | 2.5 to 4.7  | 68.3  | 50.3 to 88.0  | 0.9 | 0.7 to 1.2 |
| Peru       | Both   | 15 to 19 | 5    | 3.6 to 6.8  | 109   | 72.5 to 152.8 | 1.6 | 1.0 to 2.2 |
| Colombia   | Male   | 1 to 4   | 1.1  | 0.7 to 1.5  | 76.7  | 45.4 to 116.2 | 0.9 | 0.5 to 1.4 |
| Colombia   | Male   | 5 to 9   | 3.4  | 2.4 to 4.6  | 33.4  | 23.6 to 45.2  | 0.4 | 0.3 to 0.6 |
| Colombia   | Male   | 10 to 14 | 6.7  | 4.9 to 8.9  | 60.6  | 41.2 to 85.0  | 0.8 | 0.5 to 1.1 |
| Colombia   | Male   | 15 to 19 | 10.6 | 7.2 to 14.5 | 95.3  | 57.7 to 149.7 | 1.4 | 0.8 to 2.1 |
| Colombia   | Female | 1 to 4   | 0.8  | 0.5 to 1.0  | 64.3  | 34.5 to 97.9  | 0.8 | 0.4 to 1.2 |
| Colombia   | Female | 5 to 9   | 2.3  | 1.6 to 3.1  | 31.1  | 20.7 to 43.3  | 0.4 | 0.3 to 0.5 |
| Colombia   | Female | 10 to 14 | 4.6  | 3.2 to 6.1  | 50.2  | 33.7 to 74.0  | 0.7 | 0.4 to 1.0 |
| Colombia   | Female | 15 to 19 | 7.3  | 4.9 to 9.8  | 70.8  | 43.0 to 105.5 | 1   | 0.6 to 1.5 |
| Colombia   | Both   | 1 to 4   | 0.9  | 0.7 to 1.2  | 70.6  | 47.0 to 98.2  | 0.8 | 0.6 to 1.2 |
| Colombia   | Both   | 5 to 9   | 2.9  | 2.3 to 3.5  | 32.3  | 24.3 to 41.4  | 0.4 | 0.3 to 0.5 |
| Colombia   | Both   | 10 to 14 | 5.7  | 4.5 to 7.0  | 55.5  | 42.1 to 72.2  | 0.7 | 0.6 to 1.0 |
| Colombia   | Both   | 15 to 19 | 8.9  | 6.9 to 11.2 | 83.3  | 58.3 to 113.8 | 1.2 | 0.8 to 1.6 |
| Costa Rica | Male   | 1 to 4   | 1.1  | 0.7 to 1.5  | 7     | 3.0 to 12.4   | 0.1 | 0.0 to 0.1 |
| Costa Rica | Male   | 5 to 9   | 3.3  | 2.4 to 4.4  | 5.4   | 3.3 to 7.9    | 0.1 | 0.0 to 0.1 |
| Costa Rica | Male   | 10 to 14 | 6.7  | 4.6 to 8.8  | 16.8  | 11.6 to 23.9  | 0.2 | 0.1 to 0.3 |
| Costa Rica | Male   | 15 to 19 | 10.7 | 7.3 to 14.4 | 37    | 23.6 to 54.2  | 0.5 | 0.3 to 0.8 |

|             |        |          |      |             |       |               |     |            |
|-------------|--------|----------|------|-------------|-------|---------------|-----|------------|
| Costa Rica  | Female | 1 to 4   | 0.7  | 0.5 to 1.0  | 5.6   | 2.3 to 9.4    | 0.1 | 0.0 to 0.1 |
| Costa Rica  | Female | 5 to 9   | 2.2  | 1.6 to 2.9  | 7.3   | 4.5 to 10.0   | 0.1 | 0.1 to 0.1 |
| Costa Rica  | Female | 10 to 14 | 4.4  | 3.1 to 6.0  | 18.6  | 12.2 to 26.0  | 0.2 | 0.2 to 0.3 |
| Costa Rica  | Female | 15 to 19 | 7    | 4.7 to 9.6  | 34.2  | 22.3 to 49.7  | 0.5 | 0.3 to 0.7 |
| Costa Rica  | Both   | 1 to 4   | 0.9  | 0.7 to 1.1  | 6.3   | 2.9 to 10.2   | 0.1 | 0.0 to 0.1 |
| Costa Rica  | Both   | 5 to 9   | 2.8  | 2.2 to 3.4  | 6.3   | 4.3 to 8.3    | 0.1 | 0.0 to 0.1 |
| Costa Rica  | Both   | 10 to 14 | 5.6  | 4.3 to 7.0  | 17.7  | 13.1 to 22.7  | 0.2 | 0.2 to 0.3 |
| Costa Rica  | Both   | 15 to 19 | 8.9  | 6.8 to 11.3 | 35.6  | 26.3 to 46.9  | 0.5 | 0.4 to 0.7 |
| El Salvador | Male   | 1 to 4   | 1.1  | 0.7 to 1.5  | 30.4  | 16.6 to 49.5  | 0.4 | 0.2 to 0.6 |
| El Salvador | Male   | 5 to 9   | 3.4  | 2.3 to 4.4  | 21.6  | 14.0 to 31.0  | 0.3 | 0.2 to 0.4 |
| El Salvador | Male   | 10 to 14 | 6.7  | 4.5 to 8.9  | 53.9  | 35.4 to 76.3  | 0.7 | 0.5 to 1.0 |
| El Salvador | Male   | 15 to 19 | 10.7 | 6.9 to 14.6 | 95.1  | 57.1 to 151.3 | 1.4 | 0.8 to 2.2 |
| El Salvador | Female | 1 to 4   | 0.7  | 0.5 to 1.0  | 24.2  | 13.5 to 39.5  | 0.3 | 0.2 to 0.5 |
| El Salvador | Female | 5 to 9   | 2.2  | 1.5 to 3.1  | 18.8  | 11.9 to 28.1  | 0.2 | 0.1 to 0.3 |
| El Salvador | Female | 10 to 14 | 4.4  | 2.9 to 6.1  | 57.5  | 36.9 to 91.8  | 0.8 | 0.5 to 1.2 |
| El Salvador | Female | 15 to 19 | 7    | 4.5 to 9.9  | 82    | 50.5 to 124.3 | 1.2 | 0.7 to 1.8 |
| El Salvador | Both   | 1 to 4   | 0.9  | 0.7 to 1.1  | 27.4  | 17.1 to 42.1  | 0.3 | 0.2 to 0.5 |
| El Salvador | Both   | 5 to 9   | 2.8  | 2.2 to 3.4  | 20.2  | 14.9 to 26.5  | 0.2 | 0.2 to 0.3 |
| El Salvador | Both   | 10 to 14 | 5.6  | 4.2 to 7.0  | 55.6  | 41.3 to 73.1  | 0.7 | 0.5 to 1.0 |
| El Salvador | Both   | 15 to 19 | 8.9  | 6.6 to 11.4 | 88.6  | 63.4 to 121.2 | 1.3 | 0.9 to 1.7 |
| Guatemala   | Male   | 1 to 4   | 1.1  | 0.7 to 1.5  | 49.5  | 26.4 to 80.1  | 0.6 | 0.3 to 0.9 |
| Guatemala   | Male   | 5 to 9   | 3.3  | 2.2 to 4.3  | 28.2  | 17.7 to 40.7  | 0.3 | 0.2 to 0.5 |
| Guatemala   | Male   | 10 to 14 | 6.5  | 4.3 to 8.7  | 56    | 36.7 to 80.6  | 0.7 | 0.5 to 1.1 |
| Guatemala   | Male   | 15 to 19 | 10.4 | 6.7 to 14.3 | 83.2  | 47.4 to 127.7 | 1.2 | 0.7 to 1.8 |
| Guatemala   | Female | 1 to 4   | 0.7  | 0.5 to 1.0  | 56.5  | 15.5 to 97.6  | 0.7 | 0.2 to 1.2 |
| Guatemala   | Female | 5 to 9   | 2.1  | 1.5 to 2.9  | 29.2  | 11.1 to 44.4  | 0.4 | 0.1 to 0.6 |
| Guatemala   | Female | 10 to 14 | 4.2  | 2.9 to 5.9  | 55.7  | 24.8 to 82.1  | 0.7 | 0.3 to 1.1 |
| Guatemala   | Female | 15 to 19 | 6.8  | 4.4 to 9.6  | 111.6 | 61.4 to 165.1 | 1.6 | 0.9 to 2.4 |
| Guatemala   | Both   | 1 to 4   | 0.9  | 0.7 to 1.1  | 52.9  | 26.8 to 78.9  | 0.6 | 0.3 to 0.9 |
| Guatemala   | Both   | 5 to 9   | 2.7  | 2.1 to 3.3  | 28.7  | 16.7 to 39.4  | 0.4 | 0.2 to 0.5 |
| Guatemala   | Both   | 10 to 14 | 5.4  | 4.2 to 6.7  | 55.9  | 35.7 to 75.3  | 0.7 | 0.5 to 1.0 |
| Guatemala   | Both   | 15 to 19 | 8.6  | 6.7 to 10.9 | 97.4  | 64.6 to 130.0 | 1.4 | 0.9 to 1.9 |
| Honduras    | Male   | 1 to 4   | 1.1  | 0.8 to 1.5  | 113.2 | 38.3 to 273.8 | 1.3 | 0.5 to 3.2 |

|           |        |          |      |             |       |               |     |            |
|-----------|--------|----------|------|-------------|-------|---------------|-----|------------|
| Honduras  | Male   | 5 to 9   | 3.3  | 2.3 to 4.4  | 67    | 28.2 to 137.1 | 0.8 | 0.3 to 1.7 |
| Honduras  | Male   | 10 to 14 | 6.6  | 4.5 to 9.1  | 86.5  | 36.9 to 180.5 | 1.2 | 0.5 to 2.4 |
| Honduras  | Male   | 15 to 19 | 10.6 | 7.1 to 14.8 | 99    | 35.0 to 259.8 | 1.4 | 0.5 to 3.7 |
| Honduras  | Female | 1 to 4   | 0.7  | 0.5 to 1.0  | 91.7  | 32.0 to 202.4 | 1.1 | 0.4 to 2.4 |
| Honduras  | Female | 5 to 9   | 2.2  | 1.5 to 2.9  | 46.7  | 19.7 to 95.0  | 0.6 | 0.2 to 1.2 |
| Honduras  | Female | 10 to 14 | 4.3  | 3.0 to 5.8  | 69.1  | 26.4 to 143.7 | 0.9 | 0.3 to 1.9 |
| Honduras  | Female | 15 to 19 | 6.8  | 4.5 to 9.4  | 96    | 34.3 to 191.0 | 1.4 | 0.5 to 2.7 |
| Honduras  | Both   | 1 to 4   | 0.9  | 0.7 to 1.1  | 102.7 | 44.4 to 210.6 | 1.2 | 0.5 to 2.5 |
| Honduras  | Both   | 5 to 9   | 2.8  | 2.2 to 3.4  | 57.1  | 29.7 to 100.4 | 0.7 | 0.4 to 1.3 |
| Honduras  | Both   | 10 to 14 | 5.5  | 4.3 to 6.8  | 78    | 38.1 to 145.6 | 1   | 0.5 to 2.0 |
| Honduras  | Both   | 15 to 19 | 8.7  | 6.7 to 11.0 | 97.5  | 46.0 to 212.6 | 1.4 | 0.6 to 3.0 |
| Mexico    | Male   | 1 to 4   | 1.1  | 1.0 to 1.2  | 38.2  | 23.9 to 55.2  | 0.4 | 0.3 to 0.7 |
| Mexico    | Male   | 5 to 9   | 3.3  | 3.1 to 3.6  | 23.8  | 17.9 to 29.8  | 0.3 | 0.2 to 0.4 |
| Mexico    | Male   | 10 to 14 | 6.6  | 6.1 to 7.1  | 45.1  | 35.7 to 55.6  | 0.6 | 0.5 to 0.7 |
| Mexico    | Male   | 15 to 19 | 10.5 | 9.7 to 11.3 | 82.1  | 65.1 to 104.9 | 1.2 | 0.9 to 1.5 |
| Mexico    | Female | 1 to 4   | 0.7  | 0.7 to 0.8  | 30.4  | 19.4 to 39.8  | 0.4 | 0.2 to 0.5 |
| Mexico    | Female | 5 to 9   | 2.2  | 2.0 to 2.4  | 18.1  | 12.8 to 23.0  | 0.2 | 0.2 to 0.3 |
| Mexico    | Female | 10 to 14 | 4.4  | 4.1 to 4.7  | 34.4  | 25.3 to 43.5  | 0.5 | 0.3 to 0.6 |
| Mexico    | Female | 15 to 19 | 7.1  | 6.5 to 7.7  | 59    | 44.3 to 81.1  | 0.8 | 0.6 to 1.2 |
| Mexico    | Both   | 1 to 4   | 0.9  | 0.9 to 1.0  | 34.4  | 24.0 to 46.2  | 0.4 | 0.3 to 0.5 |
| Mexico    | Both   | 5 to 9   | 2.8  | 2.6 to 2.9  | 21    | 17.3 to 25.1  | 0.3 | 0.2 to 0.3 |
| Mexico    | Both   | 10 to 14 | 5.5  | 5.2 to 5.8  | 39.9  | 33.5 to 46.5  | 0.5 | 0.4 to 0.6 |
| Mexico    | Both   | 15 to 19 | 8.8  | 8.3 to 9.3  | 70.8  | 60.2 to 85.7  | 1   | 0.8 to 1.2 |
| Nicaragua | Male   | 1 to 4   | 1.1  | 0.7 to 1.5  | 37.5  | 21.7 to 61.9  | 0.4 | 0.3 to 0.7 |
| Nicaragua | Male   | 5 to 9   | 3.2  | 2.3 to 4.3  | 29.8  | 18.8 to 42.3  | 0.4 | 0.2 to 0.5 |
| Nicaragua | Male   | 10 to 14 | 6.4  | 4.5 to 8.5  | 46.8  | 30.3 to 67.5  | 0.6 | 0.4 to 0.9 |
| Nicaragua | Male   | 15 to 19 | 10.1 | 6.9 to 13.8 | 53.2  | 34.0 to 78.5  | 0.7 | 0.5 to 1.1 |
| Nicaragua | Female | 1 to 4   | 0.8  | 0.5 to 1.1  | 27.8  | 17.4 to 45.2  | 0.3 | 0.2 to 0.5 |
| Nicaragua | Female | 5 to 9   | 2.3  | 1.7 to 2.9  | 21.2  | 13.7 to 29.8  | 0.3 | 0.2 to 0.4 |
| Nicaragua | Female | 10 to 14 | 4.6  | 3.4 to 5.8  | 28.7  | 19.1 to 40.5  | 0.4 | 0.2 to 0.5 |
| Nicaragua | Female | 15 to 19 | 7.4  | 5.3 to 9.7  | 39.9  | 24.5 to 57.7  | 0.6 | 0.3 to 0.8 |
| Nicaragua | Both   | 1 to 4   | 0.9  | 0.7 to 1.1  | 32.8  | 21.9 to 48.3  | 0.4 | 0.3 to 0.6 |
| Nicaragua | Both   | 5 to 9   | 2.8  | 2.2 to 3.4  | 25.6  | 17.9 to 33.8  | 0.3 | 0.2 to 0.4 |

|           |        |          |      |             |      |               |     |            |
|-----------|--------|----------|------|-------------|------|---------------|-----|------------|
| Nicaragua | Both   | 10 to 14 | 5.5  | 4.3 to 6.7  | 37.9 | 27.8 to 49.5  | 0.5 | 0.4 to 0.7 |
| Nicaragua | Both   | 15 to 19 | 8.7  | 6.7 to 10.9 | 46.6 | 33.0 to 62.9  | 0.7 | 0.5 to 0.9 |
| Panama    | Male   | 1 to 4   | 1.1  | 0.7 to 1.5  | 50.3 | 27.4 to 79.1  | 0.6 | 0.3 to 0.9 |
| Panama    | Male   | 5 to 9   | 3.3  | 2.2 to 4.3  | 22.9 | 15.3 to 31.9  | 0.3 | 0.2 to 0.4 |
| Panama    | Male   | 10 to 14 | 6.5  | 4.4 to 8.6  | 36.1 | 23.5 to 53.1  | 0.5 | 0.3 to 0.7 |
| Panama    | Male   | 15 to 19 | 10.3 | 6.8 to 14.1 | 72.1 | 39.4 to 114.7 | 1   | 0.5 to 1.6 |
| Panama    | Female | 1 to 4   | 0.8  | 0.5 to 1.0  | 33.5 | 16.9 to 50.1  | 0.4 | 0.2 to 0.6 |
| Panama    | Female | 5 to 9   | 2.3  | 1.6 to 3.1  | 17.4 | 11.6 to 24.3  | 0.2 | 0.1 to 0.3 |
| Panama    | Female | 10 to 14 | 4.5  | 3.1 to 6.0  | 23   | 14.3 to 33.4  | 0.3 | 0.2 to 0.4 |
| Panama    | Female | 15 to 19 | 7.1  | 4.8 to 9.8  | 40.1 | 23.5 to 59.7  | 0.6 | 0.3 to 0.8 |
| Panama    | Both   | 1 to 4   | 0.9  | 0.7 to 1.2  | 42.1 | 25.2 to 61.7  | 0.5 | 0.3 to 0.7 |
| Panama    | Both   | 5 to 9   | 2.8  | 2.1 to 3.4  | 20.2 | 15.2 to 25.9  | 0.2 | 0.2 to 0.3 |
| Panama    | Both   | 10 to 14 | 5.5  | 4.2 to 6.7  | 29.7 | 20.6 to 39.6  | 0.4 | 0.3 to 0.5 |
| Panama    | Both   | 15 to 19 | 8.7  | 6.6 to 10.9 | 56.4 | 34.9 to 80.1  | 0.8 | 0.5 to 1.1 |
| Venezuela | Male   | 1 to 4   | 1.1  | 0.7 to 1.5  | 18.4 | 9.9 to 29.4   | 0.2 | 0.1 to 0.3 |
| Venezuela | Male   | 5 to 9   | 3.3  | 2.3 to 4.5  | 13.5 | 8.7 to 18.8   | 0.2 | 0.1 to 0.2 |
| Venezuela | Male   | 10 to 14 | 6.6  | 4.6 to 8.9  | 22.6 | 14.4 to 32.5  | 0.3 | 0.2 to 0.4 |
| Venezuela | Male   | 15 to 19 | 10.4 | 7.2 to 14.3 | 77.4 | 45.9 to 118.5 | 1.1 | 0.6 to 1.7 |
| Venezuela | Female | 1 to 4   | 0.7  | 0.5 to 1.0  | 18   | 9.6 to 27.5   | 0.2 | 0.1 to 0.3 |
| Venezuela | Female | 5 to 9   | 2.2  | 1.5 to 3.0  | 12.5 | 7.9 to 18.0   | 0.2 | 0.1 to 0.2 |
| Venezuela | Female | 10 to 14 | 4.4  | 2.9 to 6.0  | 23   | 15.3 to 32.9  | 0.3 | 0.2 to 0.4 |
| Venezuela | Female | 15 to 19 | 7    | 4.4 to 9.7  | 51.7 | 33.6 to 78.0  | 0.7 | 0.5 to 1.1 |
| Venezuela | Both   | 1 to 4   | 0.9  | 0.7 to 1.2  | 18.2 | 11.2 to 26.6  | 0.2 | 0.1 to 0.3 |
| Venezuela | Both   | 5 to 9   | 2.8  | 2.2 to 3.5  | 13   | 9.2 to 17.0   | 0.2 | 0.1 to 0.2 |
| Venezuela | Both   | 10 to 14 | 5.5  | 4.4 to 6.8  | 22.8 | 16.7 to 29.5  | 0.3 | 0.2 to 0.4 |
| Venezuela | Both   | 15 to 19 | 8.8  | 6.8 to 10.9 | 64.8 | 45.4 to 88.0  | 0.9 | 0.6 to 1.3 |
| Brazil    | Male   | 1 to 4   | 0.6  | 0.4 to 1.0  | 29.5 | 13.6 to 53.1  | 0.3 | 0.2 to 0.6 |
| Brazil    | Male   | 5 to 9   | 1.9  | 1.1 to 3.0  | 29.3 | 21.1 to 40.1  | 0.4 | 0.3 to 0.5 |
| Brazil    | Male   | 10 to 14 | 3.7  | 2.3 to 5.6  | 48   | 33.3 to 64.2  | 0.6 | 0.4 to 0.9 |
| Brazil    | Male   | 15 to 19 | 5.7  | 3.2 to 8.9  | 85.8 | 56.2 to 126.2 | 1.2 | 0.8 to 1.8 |
| Brazil    | Female | 1 to 4   | 0.5  | 0.3 to 0.8  | 20.5 | 10.7 to 34.2  | 0.2 | 0.1 to 0.4 |
| Brazil    | Female | 5 to 9   | 1.6  | 1.0 to 2.4  | 24.5 | 17.8 to 36.4  | 0.3 | 0.2 to 0.5 |
| Brazil    | Female | 10 to 14 | 3    | 2.0 to 4.3  | 43.1 | 31.3 to 65.6  | 0.6 | 0.4 to 0.9 |

|          |        |          |     |            |       |                |     |            |
|----------|--------|----------|-----|------------|-------|----------------|-----|------------|
| Brazil   | Female | 15 to 19 | 4.6 | 2.8 to 6.9 | 60.6  | 41.7 to 98.2   | 0.9 | 0.6 to 1.4 |
| Brazil   | Both   | 1 to 4   | 0.6 | 0.4 to 0.8 | 25.1  | 14.6 to 39.8   | 0.3 | 0.2 to 0.5 |
| Brazil   | Both   | 5 to 9   | 1.8 | 1.2 to 2.5 | 26.9  | 21.2 to 35.1   | 0.3 | 0.3 to 0.4 |
| Brazil   | Both   | 10 to 14 | 3.4 | 2.5 to 4.5 | 45.6  | 35.4 to 59.5   | 0.6 | 0.5 to 0.8 |
| Brazil   | Both   | 15 to 19 | 5.2 | 3.5 to 7.2 | 73.4  | 54.7 to 99.2   | 1   | 0.8 to 1.4 |
| Paraguay | Male   | 1 to 4   | 0.6 | 0.3 to 1.1 | 9.2   | 3.9 to 18.5    | 0.1 | 0.0 to 0.2 |
| Paraguay | Male   | 5 to 9   | 2   | 1.1 to 3.4 | 12.4  | 6.2 to 21.3    | 0.2 | 0.1 to 0.3 |
| Paraguay | Male   | 10 to 14 | 3.7 | 2.3 to 5.8 | 29.4  | 17.8 to 46.7   | 0.4 | 0.2 to 0.6 |
| Paraguay | Male   | 15 to 19 | 5.7 | 3.4 to 8.5 | 62.3  | 35.1 to 101.3  | 0.9 | 0.5 to 1.5 |
| Paraguay | Female | 1 to 4   | 0.5 | 0.3 to 0.8 | 14.8  | 6.4 to 29.3    | 0.2 | 0.1 to 0.3 |
| Paraguay | Female | 5 to 9   | 1.5 | 0.9 to 2.4 | 11.5  | 5.9 to 20.0    | 0.1 | 0.1 to 0.2 |
| Paraguay | Female | 10 to 14 | 2.8 | 1.8 to 4.3 | 26.2  | 15.2 to 41.6   | 0.3 | 0.2 to 0.6 |
| Paraguay | Female | 15 to 19 | 4.2 | 2.5 to 6.8 | 46.6  | 27.3 to 75.8   | 0.7 | 0.4 to 1.1 |
| Paraguay | Both   | 1 to 4   | 0.6 | 0.4 to 0.8 | 11.9  | 6.6 to 20.8    | 0.1 | 0.1 to 0.2 |
| Paraguay | Both   | 5 to 9   | 1.7 | 1.2 to 2.4 | 12    | 7.4 to 17.9    | 0.1 | 0.1 to 0.2 |
| Paraguay | Both   | 10 to 14 | 3.3 | 2.3 to 4.5 | 27.9  | 19.3 to 39.1   | 0.4 | 0.3 to 0.5 |
| Paraguay | Both   | 15 to 19 | 5   | 3.4 to 7.0 | 54.5  | 35.7 to 78.9   | 0.8 | 0.5 to 1.1 |
| Algeria  | Male   | 1 to 4   | 0.1 | 0.0 to 0.2 | 167.8 | 73.6 to 341.6  | 2   | 0.9 to 4.0 |
| Algeria  | Male   | 5 to 9   | 0.3 | 0.1 to 0.7 | 127.3 | 65.7 to 212.8  | 1.6 | 0.8 to 2.7 |
| Algeria  | Male   | 10 to 14 | 0.7 | 0.2 to 1.2 | 128.3 | 82.0 to 198.6  | 1.7 | 1.1 to 2.7 |
| Algeria  | Male   | 15 to 19 | 1.2 | 0.4 to 2.1 | 148.3 | 91.5 to 227.0  | 2.1 | 1.3 to 3.3 |
| Algeria  | Female | 1 to 4   | 0.1 | 0.0 to 0.2 | 220.5 | 94.6 to 425.7  | 2.6 | 1.1 to 5.0 |
| Algeria  | Female | 5 to 9   | 0.3 | 0.1 to 0.6 | 80.3  | 42.1 to 134.3  | 1   | 0.5 to 1.7 |
| Algeria  | Female | 10 to 14 | 0.6 | 0.2 to 1.1 | 89.3  | 51.9 to 139.0  | 1.2 | 0.7 to 1.9 |
| Algeria  | Female | 15 to 19 | 1   | 0.4 to 1.7 | 113.4 | 64.0 to 175.3  | 1.6 | 0.9 to 2.5 |
| Algeria  | Both   | 1 to 4   | 0.1 | 0.0 to 0.2 | 193.6 | 102.0 to 321.4 | 2.3 | 1.2 to 3.8 |
| Algeria  | Both   | 5 to 9   | 0.3 | 0.1 to 0.6 | 104.3 | 66.2 to 155.0  | 1.3 | 0.8 to 2.0 |
| Algeria  | Both   | 10 to 14 | 0.7 | 0.4 to 1.0 | 109.2 | 76.2 to 148.5  | 1.5 | 1.0 to 2.0 |
| Algeria  | Both   | 15 to 19 | 1.1 | 0.6 to 1.6 | 131.2 | 91.7 to 183.8  | 1.9 | 1.3 to 2.7 |
| Bahrain  | Male   | 1 to 4   | 0.1 | 0.0 to 0.2 | 27.1  | 14.8 to 43.0   | 0.3 | 0.2 to 0.5 |
| Bahrain  | Male   | 5 to 9   | 0.4 | 0.1 to 0.7 | 9.1   | 4.9 to 14.1    | 0.1 | 0.1 to 0.2 |
| Bahrain  | Male   | 10 to 14 | 0.8 | 0.3 to 1.4 | 13    | 7.5 to 20.0    | 0.2 | 0.1 to 0.3 |
| Bahrain  | Male   | 15 to 19 | 1.3 | 0.6 to 2.3 | 28.2  | 16.4 to 45.1   | 0.4 | 0.2 to 0.6 |

|         |        |          |     |            |       |                 |     |              |
|---------|--------|----------|-----|------------|-------|-----------------|-----|--------------|
| Bahrain | Female | 1 to 4   | 0.1 | 0.0 to 0.2 | 35.9  | 21.7 to 60.4    | 0.4 | 0.3 to 0.7   |
| Bahrain | Female | 5 to 9   | 0.3 | 0.1 to 0.6 | 22.8  | 13.8 to 34.2    | 0.3 | 0.2 to 0.4   |
| Bahrain | Female | 10 to 14 | 0.6 | 0.2 to 1.1 | 29.7  | 19.3 to 43.2    | 0.4 | 0.3 to 0.6   |
| Bahrain | Female | 15 to 19 | 1   | 0.3 to 1.9 | 56.4  | 36.6 to 82.0    | 0.8 | 0.5 to 1.2   |
| Bahrain | Both   | 1 to 4   | 0.1 | 0.0 to 0.2 | 31.4  | 19.9 to 48.0    | 0.4 | 0.2 to 0.6   |
| Bahrain | Both   | 5 to 9   | 0.3 | 0.1 to 0.6 | 15.7  | 10.4 to 22.2    | 0.2 | 0.1 to 0.3   |
| Bahrain | Both   | 10 to 14 | 0.7 | 0.4 to 1.1 | 21.2  | 15.1 to 28.5    | 0.3 | 0.2 to 0.4   |
| Bahrain | Both   | 15 to 19 | 1.2 | 0.6 to 1.8 | 41.8  | 29.2 to 56.1    | 0.6 | 0.4 to 0.8   |
| Egypt   | Male   | 1 to 4   | 0.1 | 0.0 to 0.2 | 609.9 | 375.8 to 893.2  | 7.2 | 4.5 to 10.6  |
| Egypt   | Male   | 5 to 9   | 0.4 | 0.1 to 0.7 | 480.4 | 385.2 to 588.2  | 6.1 | 4.9 to 7.4   |
| Egypt   | Male   | 10 to 14 | 0.7 | 0.3 to 1.2 | 518.4 | 419.4 to 637.9  | 7   | 5.7 to 8.6   |
| Egypt   | Male   | 15 to 19 | 1.2 | 0.5 to 2.1 | 903.9 | 695.2 to 1140.9 | 13  | 10.0 to 16.5 |
| Egypt   | Female | 1 to 4   | 0.1 | 0.0 to 0.2 | 421.7 | 242.2 to 614.9  | 5   | 2.9 to 7.3   |
| Egypt   | Female | 5 to 9   | 0.3 | 0.1 to 0.7 | 277.6 | 213.5 to 368.2  | 3.5 | 2.7 to 4.6   |
| Egypt   | Female | 10 to 14 | 0.7 | 0.3 to 1.2 | 226.4 | 168.9 to 291.8  | 3   | 2.3 to 3.9   |
| Egypt   | Female | 15 to 19 | 1.1 | 0.5 to 1.9 | 249.5 | 162.3 to 333.1  | 3.6 | 2.3 to 4.8   |
| Egypt   | Both   | 1 to 4   | 0.1 | 0.1 to 0.2 | 518   | 360.5 to 717.4  | 6.1 | 4.3 to 8.5   |
| Egypt   | Both   | 5 to 9   | 0.3 | 0.1 to 0.6 | 381.3 | 319.4 to 453.9  | 4.8 | 4.0 to 5.7   |
| Egypt   | Both   | 10 to 14 | 0.7 | 0.4 to 1.1 | 375.6 | 316.1 to 441.5  | 5.1 | 4.3 to 5.9   |
| Egypt   | Both   | 15 to 19 | 1.1 | 0.6 to 1.7 | 583.2 | 471.6 to 702.7  | 8.4 | 6.8 to 10.1  |
| Iran    | Male   | 1 to 4   | 0.3 | 0.1 to 0.4 | 35.4  | 16.9 to 61.2    | 0.4 | 0.2 to 0.7   |
| Iran    | Male   | 5 to 9   | 0.7 | 0.3 to 1.1 | 35.2  | 20.9 to 50.9    | 0.4 | 0.3 to 0.6   |
| Iran    | Male   | 10 to 14 | 1.2 | 0.7 to 2.0 | 42    | 23.7 to 61.0    | 0.6 | 0.3 to 0.8   |
| Iran    | Male   | 15 to 19 | 1.9 | 1.0 to 3.1 | 54.5  | 32.3 to 83.8    | 0.8 | 0.5 to 1.2   |
| Iran    | Female | 1 to 4   | 0.3 | 0.1 to 0.4 | 29.8  | 14.6 to 62.6    | 0.4 | 0.2 to 0.7   |
| Iran    | Female | 5 to 9   | 0.7 | 0.4 to 1.2 | 26.3  | 15.8 to 50.1    | 0.3 | 0.2 to 0.6   |
| Iran    | Female | 10 to 14 | 1.3 | 0.8 to 2.1 | 28    | 15.7 to 53.3    | 0.4 | 0.2 to 0.7   |
| Iran    | Female | 15 to 19 | 2   | 1.1 to 3.2 | 35.4  | 18.8 to 52.6    | 0.5 | 0.3 to 0.8   |
| Iran    | Both   | 1 to 4   | 0.3 | 0.2 to 0.4 | 32.7  | 19.4 to 53.7    | 0.4 | 0.2 to 0.6   |
| Iran    | Both   | 5 to 9   | 0.7 | 0.5 to 1.0 | 30.9  | 22.0 to 45.2    | 0.4 | 0.3 to 0.6   |
| Iran    | Both   | 10 to 14 | 1.3 | 0.9 to 1.8 | 35.1  | 24.6 to 49.9    | 0.5 | 0.3 to 0.7   |
| Iran    | Both   | 15 to 19 | 1.9 | 1.3 to 2.8 | 45    | 31.2 to 63.0    | 0.6 | 0.4 to 0.9   |
| Iraq    | Male   | 1 to 4   | 0.1 | 0.0 to 0.2 | 158.7 | 68.1 to 323.2   | 1.9 | 0.8 to 3.8   |

|        |        |          |     |            |       |               |     |            |
|--------|--------|----------|-----|------------|-------|---------------|-----|------------|
| Iraq   | Male   | 5 to 9   | 0.3 | 0.1 to 0.7 | 101   | 54.1 to 166.4 | 1.3 | 0.7 to 2.1 |
| Iraq   | Male   | 10 to 14 | 0.7 | 0.3 to 1.2 | 105.4 | 62.5 to 162.9 | 1.4 | 0.8 to 2.2 |
| Iraq   | Male   | 15 to 19 | 1.1 | 0.5 to 2.0 | 130   | 69.4 to 222.9 | 1.9 | 1.0 to 3.2 |
| Iraq   | Female | 1 to 4   | 0.1 | 0.0 to 0.2 | 80.4  | 29.5 to 168.9 | 1   | 0.3 to 2.0 |
| Iraq   | Female | 5 to 9   | 0.3 | 0.1 to 0.6 | 79.5  | 40.6 to 136.5 | 1   | 0.5 to 1.7 |
| Iraq   | Female | 10 to 14 | 0.6 | 0.2 to 1.0 | 89.1  | 50.7 to 152.3 | 1.2 | 0.7 to 2.0 |
| Iraq   | Female | 15 to 19 | 0.9 | 0.4 to 1.6 | 142.6 | 74.4 to 247.5 | 2.1 | 1.1 to 3.6 |
| Iraq   | Both   | 1 to 4   | 0.1 | 0.1 to 0.2 | 120.7 | 61.5 to 226.1 | 1.4 | 0.7 to 2.7 |
| Iraq   | Both   | 5 to 9   | 0.3 | 0.1 to 0.5 | 90.6  | 57.6 to 133.1 | 1.1 | 0.7 to 1.7 |
| Iraq   | Both   | 10 to 14 | 0.6 | 0.4 to 1.0 | 97.5  | 65.9 to 139.9 | 1.3 | 0.9 to 1.9 |
| Iraq   | Both   | 15 to 19 | 1   | 0.6 to 1.6 | 136.1 | 87.5 to 205.7 | 2   | 1.3 to 3.0 |
| Jordan | Male   | 1 to 4   | 0.1 | 0.0 to 0.2 | 18.3  | 5.8 to 39.4   | 0.2 | 0.1 to 0.5 |
| Jordan | Male   | 5 to 9   | 0.3 | 0.1 to 0.7 | 9.5   | 4.6 to 17.1   | 0.1 | 0.1 to 0.2 |
| Jordan | Male   | 10 to 14 | 0.7 | 0.3 to 1.3 | 10.4  | 5.9 to 17.0   | 0.1 | 0.1 to 0.2 |
| Jordan | Male   | 15 to 19 | 1.3 | 0.5 to 2.2 | 5.3   | 2.8 to 9.3    | 0.1 | 0.0 to 0.1 |
| Jordan | Female | 1 to 4   | 0.1 | 0.0 to 0.2 | 31.8  | 13.6 to 56.2  | 0.4 | 0.2 to 0.7 |
| Jordan | Female | 5 to 9   | 0.3 | 0.0 to 0.6 | 11.2  | 5.6 to 19.5   | 0.1 | 0.1 to 0.2 |
| Jordan | Female | 10 to 14 | 0.6 | 0.1 to 1.0 | 19.9  | 10.3 to 35.7  | 0.3 | 0.1 to 0.5 |
| Jordan | Female | 15 to 19 | 1   | 0.3 to 1.7 | 17.1  | 8.5 to 29.3   | 0.2 | 0.1 to 0.4 |
| Jordan | Both   | 1 to 4   | 0.1 | 0.0 to 0.2 | 24.9  | 12.5 to 41.5  | 0.3 | 0.1 to 0.5 |
| Jordan | Both   | 5 to 9   | 0.3 | 0.1 to 0.6 | 10.3  | 6.3 to 16.1   | 0.1 | 0.1 to 0.2 |
| Jordan | Both   | 10 to 14 | 0.7 | 0.3 to 1.1 | 15    | 9.5 to 23.4   | 0.2 | 0.1 to 0.3 |
| Jordan | Both   | 15 to 19 | 1.1 | 0.6 to 1.7 | 11.1  | 6.3 to 17.0   | 0.2 | 0.1 to 0.2 |
| Kuwait | Male   | 1 to 4   | 0.1 | 0.0 to 0.2 | 28.5  | 16.5 to 43.7  | 0.3 | 0.2 to 0.5 |
| Kuwait | Male   | 5 to 9   | 0.4 | 0.1 to 0.8 | 15.7  | 9.5 to 22.9   | 0.2 | 0.1 to 0.3 |
| Kuwait | Male   | 10 to 14 | 0.8 | 0.3 to 1.4 | 18.6  | 12.2 to 27.1  | 0.2 | 0.2 to 0.4 |
| Kuwait | Male   | 15 to 19 | 1.3 | 0.5 to 2.4 | 34.2  | 22.0 to 53.3  | 0.5 | 0.3 to 0.8 |
| Kuwait | Female | 1 to 4   | 0.1 | 0.0 to 0.2 | 38.4  | 24.6 to 57.8  | 0.5 | 0.3 to 0.7 |
| Kuwait | Female | 5 to 9   | 0.2 | 0.0 to 0.6 | 24    | 16.0 to 33.9  | 0.3 | 0.2 to 0.4 |
| Kuwait | Female | 10 to 14 | 0.5 | 0.1 to 1.0 | 26.5  | 17.0 to 37.3  | 0.4 | 0.2 to 0.5 |
| Kuwait | Female | 15 to 19 | 0.9 | 0.3 to 1.6 | 43.1  | 29.0 to 63.2  | 0.6 | 0.4 to 0.9 |
| Kuwait | Both   | 1 to 4   | 0.1 | 0.0 to 0.2 | 33.3  | 21.9 to 47.2  | 0.4 | 0.3 to 0.6 |
| Kuwait | Both   | 5 to 9   | 0.3 | 0.1 to 0.6 | 19.7  | 14.1 to 26.2  | 0.2 | 0.2 to 0.3 |

|         |        |          |     |            |       |                |     |            |
|---------|--------|----------|-----|------------|-------|----------------|-----|------------|
| Kuwait  | Both   | 10 to 14 | 0.7 | 0.3 to 1.1 | 22.5  | 16.6 to 29.5   | 0.3 | 0.2 to 0.4 |
| Kuwait  | Both   | 15 to 19 | 1.1 | 0.6 to 1.7 | 38.5  | 28.6 to 50.9   | 0.6 | 0.4 to 0.7 |
| Lebanon | Male   | 1 to 4   | 0.1 | 0.1 to 0.3 | 24.3  | 8.5 to 57.2    | 0.3 | 0.1 to 0.7 |
| Lebanon | Male   | 5 to 9   | 0.4 | 0.2 to 0.8 | 19.1  | 8.7 to 37.0    | 0.2 | 0.1 to 0.5 |
| Lebanon | Male   | 10 to 14 | 0.8 | 0.4 to 1.4 | 20.2  | 9.8 to 36.6    | 0.3 | 0.1 to 0.5 |
| Lebanon | Male   | 15 to 19 | 1.3 | 0.5 to 2.2 | 25.6  | 11.2 to 46.5   | 0.4 | 0.2 to 0.7 |
| Lebanon | Female | 1 to 4   | 0.1 | 0.0 to 0.2 | 84.9  | 10.1 to 185.4  | 1   | 0.1 to 2.2 |
| Lebanon | Female | 5 to 9   | 0.3 | 0.1 to 0.6 | 50.7  | 10.8 to 95.5   | 0.6 | 0.1 to 1.2 |
| Lebanon | Female | 10 to 14 | 0.6 | 0.2 to 1.0 | 60.4  | 13.1 to 112.0  | 0.8 | 0.2 to 1.5 |
| Lebanon | Female | 15 to 19 | 0.9 | 0.4 to 1.7 | 86.5  | 14.4 to 154.9  | 1.2 | 0.2 to 2.2 |
| Lebanon | Both   | 1 to 4   | 0.1 | 0.1 to 0.2 | 53.9  | 13.8 to 106.0  | 0.6 | 0.2 to 1.3 |
| Lebanon | Both   | 5 to 9   | 0.3 | 0.2 to 0.6 | 34.8  | 12.6 to 60.2   | 0.4 | 0.2 to 0.8 |
| Lebanon | Both   | 10 to 14 | 0.7 | 0.4 to 1.0 | 40.7  | 14.7 to 69.8   | 0.5 | 0.2 to 0.9 |
| Lebanon | Both   | 15 to 19 | 1.1 | 0.6 to 1.6 | 57.1  | 16.4 to 97.3   | 0.8 | 0.2 to 1.4 |
| Libya   | Male   | 1 to 4   | 0   | 0.0 to 0.0 | 388.1 | 192.4 to 662.7 | 4.6 | 2.3 to 7.8 |
| Libya   | Male   | 5 to 9   | 0.1 | 0.0 to 0.1 | 142.6 | 80.1 to 227.7  | 1.8 | 1.0 to 2.9 |
| Libya   | Male   | 10 to 14 | 0.1 | 0.0 to 0.3 | 131.3 | 75.6 to 198.7  | 1.8 | 1.0 to 2.7 |
| Libya   | Male   | 15 to 19 | 0.2 | 0.1 to 0.5 | 158.4 | 91.6 to 257.3  | 2.3 | 1.3 to 3.7 |
| Libya   | Female | 1 to 4   | 0   | 0.0 to 0.0 | 343.1 | 174.7 to 595.8 | 4.1 | 2.1 to 7.1 |
| Libya   | Female | 5 to 9   | 0   | 0.0 to 0.1 | 107   | 58.0 to 176.8  | 1.3 | 0.7 to 2.2 |
| Libya   | Female | 10 to 14 | 0.1 | 0.0 to 0.2 | 109.7 | 66.0 to 166.3  | 1.5 | 0.9 to 2.2 |
| Libya   | Female | 15 to 19 | 0.2 | 0.0 to 0.3 | 155.6 | 87.7 to 239.8  | 2.2 | 1.3 to 3.5 |
| Libya   | Both   | 1 to 4   | 0   | 0.0 to 0.0 | 366.2 | 219.8 to 564.5 | 4.3 | 2.6 to 6.7 |
| Libya   | Both   | 5 to 9   | 0.1 | 0.0 to 0.1 | 125.2 | 83.8 to 180.8  | 1.6 | 1.1 to 2.3 |
| Libya   | Both   | 10 to 14 | 0.1 | 0.1 to 0.2 | 120.8 | 85.5 to 169.3  | 1.6 | 1.2 to 2.3 |
| Libya   | Both   | 15 to 19 | 0.2 | 0.1 to 0.4 | 157   | 107.5 to 220.4 | 2.3 | 1.6 to 3.2 |
| Morocco | Male   | 1 to 4   | 0.1 | 0.1 to 0.2 | 240.9 | 121.4 to 441.0 | 2.9 | 1.4 to 5.2 |
| Morocco | Male   | 5 to 9   | 0.4 | 0.1 to 0.7 | 98.9  | 56.6 to 155.0  | 1.2 | 0.7 to 2.0 |
| Morocco | Male   | 10 to 14 | 0.7 | 0.3 to 1.3 | 97.3  | 59.3 to 144.8  | 1.3 | 0.8 to 2.0 |
| Morocco | Male   | 15 to 19 | 1.1 | 0.4 to 2.2 | 113.5 | 67.5 to 181.4  | 1.6 | 1.0 to 2.6 |
| Morocco | Female | 1 to 4   | 0.1 | 0.0 to 0.2 | 194.9 | 97.0 to 335.9  | 2.3 | 1.1 to 4.0 |
| Morocco | Female | 5 to 9   | 0.3 | 0.1 to 0.6 | 91.8  | 49.5 to 153.0  | 1.2 | 0.6 to 1.9 |
| Morocco | Female | 10 to 14 | 0.6 | 0.2 to 1.2 | 65.4  | 34.5 to 103.8  | 0.9 | 0.5 to 1.4 |

|           |        |          |     |            |       |                |     |            |
|-----------|--------|----------|-----|------------|-------|----------------|-----|------------|
| Morocco   | Female | 15 to 19 | 1.1 | 0.4 to 1.9 | 101.8 | 60.0 to 154.5  | 1.5 | 0.9 to 2.2 |
| Morocco   | Both   | 1 to 4   | 0.1 | 0.0 to 0.2 | 218.5 | 123.5 to 348.1 | 2.6 | 1.5 to 4.1 |
| Morocco   | Both   | 5 to 9   | 0.3 | 0.1 to 0.6 | 95.4  | 62.3 to 140.2  | 1.2 | 0.8 to 1.8 |
| Morocco   | Both   | 10 to 14 | 0.7 | 0.3 to 1.1 | 81.7  | 56.8 to 113.0  | 1.1 | 0.8 to 1.5 |
| Morocco   | Both   | 15 to 19 | 1.1 | 0.5 to 1.7 | 107.8 | 74.1 to 149.9  | 1.6 | 1.1 to 2.2 |
| Palestine | Male   | 1 to 4   | 0.2 | 0.1 to 0.3 | 118.1 | 51.6 to 226.1  | 1.4 | 0.6 to 2.7 |
| Palestine | Male   | 5 to 9   | 0.5 | 0.2 to 0.9 | 64.7  | 35.0 to 105.9  | 0.8 | 0.4 to 1.3 |
| Palestine | Male   | 10 to 14 | 1   | 0.6 to 1.7 | 65.5  | 37.0 to 103.4  | 0.9 | 0.5 to 1.4 |
| Palestine | Male   | 15 to 19 | 1.6 | 0.7 to 2.8 | 163.2 | 90.9 to 261.6  | 2.4 | 1.3 to 3.8 |
| Palestine | Female | 1 to 4   | 0.2 | 0.1 to 0.4 | 155.4 | 66.8 to 293.6  | 1.8 | 0.8 to 3.5 |
| Palestine | Female | 5 to 9   | 0.5 | 0.2 to 1.0 | 43.8  | 21.8 to 74.4   | 0.6 | 0.3 to 0.9 |
| Palestine | Female | 10 to 14 | 0.9 | 0.5 to 1.6 | 53.1  | 29.2 to 83.4   | 0.7 | 0.4 to 1.1 |
| Palestine | Female | 15 to 19 | 1.4 | 0.7 to 2.4 | 79.1  | 45.4 to 126.4  | 1.1 | 0.7 to 1.8 |
| Palestine | Both   | 1 to 4   | 0.2 | 0.1 to 0.3 | 136.3 | 71.7 to 230.1  | 1.6 | 0.8 to 2.7 |
| Palestine | Both   | 5 to 9   | 0.5 | 0.3 to 0.8 | 54.5  | 33.9 to 80.1   | 0.7 | 0.4 to 1.0 |
| Palestine | Both   | 10 to 14 | 1   | 0.6 to 1.4 | 59.4  | 38.2 to 83.4   | 0.8 | 0.5 to 1.1 |
| Palestine | Both   | 15 to 19 | 1.5 | 0.9 to 2.3 | 122   | 79.3 to 181.0  | 1.8 | 1.1 to 2.6 |
| Oman      | Male   | 1 to 4   | 0.1 | 0.0 to 0.2 | 52.8  | 22.7 to 99.4   | 0.6 | 0.3 to 1.2 |
| Oman      | Male   | 5 to 9   | 0.4 | 0.1 to 0.7 | 29.5  | 14.5 to 52.2   | 0.4 | 0.2 to 0.7 |
| Oman      | Male   | 10 to 14 | 0.8 | 0.3 to 1.4 | 32.2  | 18.2 to 51.8   | 0.4 | 0.2 to 0.7 |
| Oman      | Male   | 15 to 19 | 1.3 | 0.5 to 2.2 | 58    | 33.3 to 94.4   | 0.8 | 0.5 to 1.4 |
| Oman      | Female | 1 to 4   | 0.1 | 0.0 to 0.2 | 101.5 | 49.8 to 176.0  | 1.2 | 0.6 to 2.1 |
| Oman      | Female | 5 to 9   | 0.3 | 0.1 to 0.6 | 45.8  | 23.8 to 77.9   | 0.6 | 0.3 to 1.0 |
| Oman      | Female | 10 to 14 | 0.6 | 0.2 to 1.1 | 58.1  | 32.9 to 95.1   | 0.8 | 0.4 to 1.3 |
| Oman      | Female | 15 to 19 | 1   | 0.2 to 1.9 | 84.7  | 46.6 to 138.2  | 1.2 | 0.7 to 2.0 |
| Oman      | Both   | 1 to 4   | 0.1 | 0.1 to 0.2 | 76.6  | 41.5 to 123.2  | 0.9 | 0.5 to 1.5 |
| Oman      | Both   | 5 to 9   | 0.3 | 0.2 to 0.6 | 37.5  | 23.8 to 57.8   | 0.5 | 0.3 to 0.7 |
| Oman      | Both   | 10 to 14 | 0.7 | 0.4 to 1.1 | 44.8  | 28.9 to 64.4   | 0.6 | 0.4 to 0.9 |
| Oman      | Both   | 15 to 19 | 1.2 | 0.6 to 1.8 | 69.8  | 45.7 to 99.9   | 1   | 0.7 to 1.4 |
| Qatar     | Male   | 1 to 4   | 0.1 | 0.0 to 0.3 | 49    | 22.0 to 90.9   | 0.6 | 0.3 to 1.1 |
| Qatar     | Male   | 5 to 9   | 0.4 | 0.1 to 0.8 | 70.4  | 44.4 to 99.7   | 0.9 | 0.6 to 1.3 |
| Qatar     | Male   | 10 to 14 | 0.8 | 0.3 to 1.4 | 38.5  | 26.6 to 52.7   | 0.5 | 0.4 to 0.7 |
| Qatar     | Male   | 15 to 19 | 1.3 | 0.4 to 2.4 | 19.4  | 10.8 to 29.4   | 0.3 | 0.2 to 0.4 |

|              |        |          |     |            |       |                 |      |             |
|--------------|--------|----------|-----|------------|-------|-----------------|------|-------------|
| Qatar        | Female | 1 to 4   | 0.1 | 0.0 to 0.2 | 81.9  | 47.1 to 131.1   | 1    | 0.6 to 1.6  |
| Qatar        | Female | 5 to 9   | 0.4 | 0.2 to 0.6 | 31    | 18.9 to 45.7    | 0.4  | 0.2 to 0.6  |
| Qatar        | Female | 10 to 14 | 0.7 | 0.3 to 1.2 | 35.8  | 20.8 to 61.0    | 0.5  | 0.3 to 0.8  |
| Qatar        | Female | 15 to 19 | 1.1 | 0.4 to 2.0 | 51.1  | 29.0 to 80.8    | 0.7  | 0.4 to 1.2  |
| Qatar        | Both   | 1 to 4   | 0.1 | 0.1 to 0.2 | 65.1  | 38.9 to 97.1    | 0.8  | 0.5 to 1.2  |
| Qatar        | Both   | 5 to 9   | 0.4 | 0.2 to 0.6 | 51.5  | 34.9 to 69.5    | 0.6  | 0.4 to 0.9  |
| Qatar        | Both   | 10 to 14 | 0.7 | 0.4 to 1.1 | 37.2  | 27.2 to 50.4    | 0.5  | 0.4 to 0.7  |
| Qatar        | Both   | 15 to 19 | 1.2 | 0.6 to 2.0 | 30.4  | 20.0 to 43.1    | 0.4  | 0.3 to 0.6  |
| Saudi Arabia | Male   | 1 to 4   | 0   | 0.0 to 0.1 | 23.5  | 11.6 to 40.6    | 0.3  | 0.1 to 0.5  |
| Saudi Arabia | Male   | 5 to 9   | 0.1 | 0.0 to 0.2 | 20.6  | 12.6 to 29.3    | 0.3  | 0.2 to 0.4  |
| Saudi Arabia | Male   | 10 to 14 | 0.2 | 0.1 to 0.4 | 27.5  | 18.0 to 38.9    | 0.4  | 0.2 to 0.5  |
| Saudi Arabia | Male   | 15 to 19 | 0.4 | 0.2 to 0.7 | 33.9  | 21.9 to 49.9    | 0.5  | 0.3 to 0.7  |
| Saudi Arabia | Female | 1 to 4   | 0   | 0.0 to 0.0 | 29.4  | 17.2 to 45.6    | 0.3  | 0.2 to 0.5  |
| Saudi Arabia | Female | 5 to 9   | 0   | 0.0 to 0.1 | 23.7  | 15.1 to 33.5    | 0.3  | 0.2 to 0.4  |
| Saudi Arabia | Female | 10 to 14 | 0.1 | 0.0 to 0.1 | 25.1  | 15.3 to 35.2    | 0.3  | 0.2 to 0.5  |
| Saudi Arabia | Female | 15 to 19 | 0.1 | 0.1 to 0.2 | 37.7  | 23.9 to 54.4    | 0.5  | 0.3 to 0.8  |
| Saudi Arabia | Both   | 1 to 4   | 0   | 0.0 to 0.0 | 26.4  | 15.6 to 40.6    | 0.3  | 0.2 to 0.5  |
| Saudi Arabia | Both   | 5 to 9   | 0.1 | 0.0 to 0.1 | 22.1  | 15.3 to 29.0    | 0.3  | 0.2 to 0.4  |
| Saudi Arabia | Both   | 10 to 14 | 0.2 | 0.1 to 0.2 | 26.4  | 18.8 to 34.2    | 0.4  | 0.3 to 0.5  |
| Saudi Arabia | Both   | 15 to 19 | 0.3 | 0.2 to 0.4 | 35.6  | 26.2 to 47.3    | 0.5  | 0.4 to 0.7  |
| Syria        | Male   | 1 to 4   | 0.1 | 0.1 to 0.3 | 87.9  | 26.0 to 177.8   | 1    | 0.3 to 2.1  |
| Syria        | Male   | 5 to 9   | 0.4 | 0.2 to 0.8 | 61.1  | 29.2 to 101.7   | 0.8  | 0.4 to 1.3  |
| Syria        | Male   | 10 to 14 | 0.8 | 0.4 to 1.4 | 85.6  | 48.2 to 134.9   | 1.2  | 0.6 to 1.8  |
| Syria        | Male   | 15 to 19 | 1.4 | 0.7 to 2.4 | 699.6 | 464.0 to 1030.6 | 10.1 | 6.7 to 14.9 |
| Syria        | Female | 1 to 4   | 0.1 | 0.0 to 0.2 | 129.1 | 29.6 to 383.1   | 1.5  | 0.4 to 4.5  |
| Syria        | Female | 5 to 9   | 0.3 | 0.1 to 0.7 | 56.7  | 22.6 to 118.5   | 0.7  | 0.3 to 1.5  |
| Syria        | Female | 10 to 14 | 0.6 | 0.3 to 1.2 | 73.1  | 39.5 to 117.8   | 1    | 0.5 to 1.6  |
| Syria        | Female | 15 to 19 | 1   | 0.4 to 1.7 | 221.7 | 127.8 to 353.7  | 3.2  | 1.8 to 5.1  |
| Syria        | Both   | 1 to 4   | 0.1 | 0.1 to 0.2 | 108   | 33.4 to 244.3   | 1.3  | 0.4 to 2.9  |
| Syria        | Both   | 5 to 9   | 0.4 | 0.2 to 0.6 | 58.9  | 30.0 to 98.0    | 0.7  | 0.4 to 1.2  |
| Syria        | Both   | 10 to 14 | 0.7 | 0.4 to 1.1 | 79.5  | 51.6 to 112.2   | 1.1  | 0.7 to 1.5  |
| Syria        | Both   | 15 to 19 | 1.2 | 0.7 to 1.8 | 468.2 | 330.7 to 645.1  | 6.8  | 4.8 to 9.3  |
| Tunisia      | Male   | 1 to 4   | 0.1 | 0.1 to 0.2 | 69.7  | 28.9 to 132.8   | 0.8  | 0.3 to 1.6  |

|                      |        |          |     |            |       |               |     |            |
|----------------------|--------|----------|-----|------------|-------|---------------|-----|------------|
| Tunisia              | Male   | 5 to 9   | 0.4 | 0.2 to 0.7 | 44.1  | 21.8 to 78.9  | 0.6 | 0.3 to 1.0 |
| Tunisia              | Male   | 10 to 14 | 0.8 | 0.4 to 1.3 | 48.8  | 27.8 to 79.5  | 0.7 | 0.4 to 1.1 |
| Tunisia              | Male   | 15 to 19 | 1.2 | 0.5 to 2.1 | 73.9  | 39.7 to 122.2 | 1.1 | 0.6 to 1.8 |
| Tunisia              | Female | 1 to 4   | 0.1 | 0.0 to 0.1 | 86    | 28.7 to 177.4 | 1   | 0.3 to 2.1 |
| Tunisia              | Female | 5 to 9   | 0.3 | 0.0 to 0.5 | 41    | 19.5 to 72.3  | 0.5 | 0.2 to 0.9 |
| Tunisia              | Female | 10 to 14 | 0.6 | 0.2 to 1.1 | 47.8  | 25.7 to 81.1  | 0.6 | 0.3 to 1.1 |
| Tunisia              | Female | 15 to 19 | 1   | 0.4 to 1.7 | 68    | 32.8 to 117.0 | 1   | 0.5 to 1.7 |
| Tunisia              | Both   | 1 to 4   | 0.1 | 0.1 to 0.2 | 77.6  | 39.2 to 135.9 | 0.9 | 0.5 to 1.6 |
| Tunisia              | Both   | 5 to 9   | 0.3 | 0.2 to 0.5 | 42.6  | 25.0 to 65.2  | 0.5 | 0.3 to 0.8 |
| Tunisia              | Both   | 10 to 14 | 0.7 | 0.4 to 1.0 | 48.3  | 32.1 to 69.9  | 0.6 | 0.4 to 0.9 |
| Tunisia              | Both   | 15 to 19 | 1.1 | 0.6 to 1.7 | 71    | 45.3 to 104.6 | 1   | 0.7 to 1.5 |
| Turkey               | Male   | 1 to 4   | 0.1 | 0.0 to 0.2 | 27.9  | 13.1 to 53.2  | 0.3 | 0.2 to 0.6 |
| Turkey               | Male   | 5 to 9   | 0.4 | 0.2 to 0.7 | 77.5  | 49.3 to 117.3 | 1   | 0.6 to 1.5 |
| Turkey               | Male   | 10 to 14 | 0.8 | 0.4 to 1.3 | 112.8 | 77.4 to 161.2 | 1.5 | 1.0 to 2.2 |
| Turkey               | Male   | 15 to 19 | 1.3 | 0.5 to 2.5 | 108   | 67.3 to 161.8 | 1.6 | 1.0 to 2.3 |
| Turkey               | Female | 1 to 4   | 0.1 | 0.0 to 0.2 | 11.2  | 1.4 to 27.3   | 0.1 | 0.0 to 0.3 |
| Turkey               | Female | 5 to 9   | 0.3 | 0.0 to 0.6 | 75.5  | 48.1 to 117.0 | 1   | 0.6 to 1.5 |
| Turkey               | Female | 10 to 14 | 0.6 | 0.2 to 1.1 | 67.9  | 40.9 to 117.2 | 0.9 | 0.5 to 1.6 |
| Turkey               | Female | 15 to 19 | 0.9 | 0.4 to 1.7 | 72.3  | 45.5 to 109.0 | 1   | 0.7 to 1.6 |
| Turkey               | Both   | 1 to 4   | 0.1 | 0.0 to 0.2 | 19.7  | 10.1 to 34.4  | 0.2 | 0.1 to 0.4 |
| Turkey               | Both   | 5 to 9   | 0.3 | 0.1 to 0.5 | 76.5  | 55.4 to 106.1 | 1   | 0.7 to 1.3 |
| Turkey               | Both   | 10 to 14 | 0.7 | 0.4 to 1.1 | 90.8  | 65.9 to 128.2 | 1.2 | 0.9 to 1.7 |
| Turkey               | Both   | 15 to 19 | 1.1 | 0.6 to 1.9 | 90.4  | 63.7 to 123.0 | 1.3 | 0.9 to 1.8 |
| United Arab Emirates | Male   | 1 to 4   | 0.1 | 0.0 to 0.2 | 21.8  | 8.0 to 48.4   | 0.3 | 0.1 to 0.6 |
| United Arab Emirates | Male   | 5 to 9   | 0.4 | 0.1 to 0.7 | 16.5  | 7.2 to 31.6   | 0.2 | 0.1 to 0.4 |
| United Arab Emirates | Male   | 10 to 14 | 0.7 | 0.3 to 1.3 | 24    | 12.6 to 42.5  | 0.3 | 0.2 to 0.6 |
| United Arab Emirates | Male   | 15 to 19 | 1.2 | 0.4 to 2.3 | 72.6  | 36.1 to 128.1 | 1   | 0.5 to 1.9 |
| United Arab Emirates | Female | 1 to 4   | 0.1 | 0.0 to 0.2 | 25.5  | 5.8 to 59.5   | 0.3 | 0.1 to 0.7 |
| United Arab Emirates | Female | 5 to 9   | 0.3 | 0.1 to 0.6 | 16.3  | 5.9 to 33.2   | 0.2 | 0.1 to 0.4 |
| United Arab Emirates | Female | 10 to 14 | 0.6 | 0.2 to 1.1 | 24.2  | 9.0 to 44.4   | 0.3 | 0.1 to 0.6 |
| United Arab Emirates | Female | 15 to 19 | 0.9 | 0.3 to 1.8 | 58.1  | 21.6 to 105.9 | 0.8 | 0.3 to 1.5 |
| United Arab Emirates | Both   | 1 to 4   | 0.1 | 0.1 to 0.2 | 23.6  | 10.0 to 46.3  | 0.3 | 0.1 to 0.5 |
| United Arab Emirates | Both   | 5 to 9   | 0.3 | 0.2 to 0.5 | 16.4  | 8.9 to 29.1   | 0.2 | 0.1 to 0.4 |

|                      |        |          |     |             |       |                |     |            |
|----------------------|--------|----------|-----|-------------|-------|----------------|-----|------------|
| United Arab Emirates | Both   | 10 to 14 | 0.7 | 0.3 to 1.1  | 24.1  | 14.4 to 38.4   | 0.3 | 0.2 to 0.5 |
| United Arab Emirates | Both   | 15 to 19 | 1.1 | 0.5 to 1.9  | 67    | 40.9 to 104.2  | 1   | 0.6 to 1.5 |
| Yemen                | Male   | 1 to 4   | 0.1 | 0.0 to 0.2  | 289.1 | 115.8 to 614.8 | 3.4 | 1.4 to 7.3 |
| Yemen                | Male   | 5 to 9   | 0.3 | 0.1 to 0.7  | 199.7 | 102.9 to 348.9 | 2.5 | 1.3 to 4.4 |
| Yemen                | Male   | 10 to 14 | 0.7 | 0.3 to 1.3  | 185.1 | 103.2 to 305.9 | 2.5 | 1.4 to 4.1 |
| Yemen                | Male   | 15 to 19 | 1.1 | 0.5 to 2.1  | 264.2 | 135.6 to 447.3 | 3.8 | 2.0 to 6.5 |
| Yemen                | Female | 1 to 4   | 0.1 | 0.0 to 0.2  | 319.8 | 95.9 to 638.4  | 3.8 | 1.1 to 7.6 |
| Yemen                | Female | 5 to 9   | 0.3 | 0.1 to 0.5  | 176.8 | 76.3 to 318.0  | 2.2 | 1.0 to 4.0 |
| Yemen                | Female | 10 to 14 | 0.6 | 0.3 to 1.0  | 198   | 91.4 to 355.8  | 2.7 | 1.2 to 4.8 |
| Yemen                | Female | 15 to 19 | 1   | 0.4 to 1.8  | 269   | 124.4 to 530.0 | 3.9 | 1.8 to 7.7 |
| Yemen                | Both   | 1 to 4   | 0.1 | 0.0 to 0.2  | 304.2 | 143.3 to 539.8 | 3.6 | 1.7 to 6.4 |
| Yemen                | Both   | 5 to 9   | 0.3 | 0.1 to 0.5  | 188.5 | 110.3 to 291.4 | 2.4 | 1.4 to 3.7 |
| Yemen                | Both   | 10 to 14 | 0.6 | 0.3 to 1.0  | 191.5 | 115.8 to 300.0 | 2.6 | 1.6 to 4.0 |
| Yemen                | Both   | 15 to 19 | 1   | 0.6 to 1.7  | 266.6 | 151.3 to 438.2 | 3.8 | 2.2 to 6.3 |
|                      |        |          |     |             |       |                |     |            |
| Afghanistan          | Male   | 1 to 4   | 0.1 | 0.0 to 0.2  | 39.8  | 13.6 to 87.8   | 0.5 | 0.2 to 1.0 |
| Afghanistan          | Male   | 5 to 9   | 0.3 | 0.1 to 0.6  | 51.4  | 22.7 to 93.8   | 0.6 | 0.3 to 1.2 |
| Afghanistan          | Male   | 10 to 14 | 0.7 | 0.3 to 1.2  | 67.4  | 35.2 to 116.2  | 0.9 | 0.5 to 1.6 |
| Afghanistan          | Male   | 15 to 19 | 1.2 | 0.4 to 2.1  | 92.9  | 50.1 to 164.0  | 1.3 | 0.7 to 2.4 |
| Afghanistan          | Female | 1 to 4   | 0.1 | 0.0 to 0.2  | 16.7  | 5.1 to 42.0    | 0.2 | 0.1 to 0.5 |
| Afghanistan          | Female | 5 to 9   | 0.3 | 0.1 to 0.6  | 54.4  | 16.6 to 151.6  | 0.7 | 0.2 to 1.9 |
| Afghanistan          | Female | 10 to 14 | 0.6 | 0.3 to 1.2  | 187.9 | 65.8 to 466.6  | 2.5 | 0.9 to 6.3 |
| Afghanistan          | Female | 15 to 19 | 1   | 0.4 to 1.9  | 326   | 147.1 to 668.7 | 4.7 | 2.1 to 9.7 |
| Afghanistan          | Both   | 1 to 4   | 0.1 | 0.1 to 0.2  | 28.5  | 11.8 to 58.0   | 0.3 | 0.1 to 0.7 |
| Afghanistan          | Both   | 5 to 9   | 0.3 | 0.1 to 0.5  | 52.9  | 24.0 to 103.0  | 0.7 | 0.3 to 1.3 |
| Afghanistan          | Both   | 10 to 14 | 0.7 | 0.4 to 1.0  | 126.3 | 63.3 to 265.2  | 1.7 | 0.9 to 3.6 |
| Afghanistan          | Both   | 15 to 19 | 1.1 | 0.6 to 1.7  | 206.8 | 114.2 to 378.0 | 3   | 1.6 to 5.5 |
| Bangladesh           | Male   | 1 to 4   | 1   | 0.6 to 1.5  | 5.3   | 2.2 to 10.7    | 0.1 | 0.0 to 0.1 |
| Bangladesh           | Male   | 5 to 9   | 3.1 | 2.0 to 4.4  | 0.7   | 0.4 to 1.0     | 0   | 0.0 to 0.0 |
| Bangladesh           | Male   | 10 to 14 | 5.9 | 4.0 to 8.3  | 58.8  | 30.9 to 96.4   | 0.8 | 0.4 to 1.3 |
| Bangladesh           | Male   | 15 to 19 | 9.1 | 6.0 to 13.0 | 153.4 | 86.7 to 251.4  | 2.2 | 1.2 to 3.6 |
| Bangladesh           | Female | 1 to 4   | 0.7 | 0.4 to 1.1  | 6.7   | 1.5 to 16.8    | 0.1 | 0.0 to 0.2 |
| Bangladesh           | Female | 5 to 9   | 2.2 | 1.3 to 3.4  | 19.1  | 6.3 to 40.2    | 0.2 | 0.1 to 0.5 |

|            |        |          |     |             |       |               |     |            |
|------------|--------|----------|-----|-------------|-------|---------------|-----|------------|
| Bangladesh | Female | 10 to 14 | 4.5 | 2.9 to 6.6  | 28.8  | 8.4 to 57.4   | 0.4 | 0.1 to 0.8 |
| Bangladesh | Female | 15 to 19 | 7.3 | 4.4 to 10.7 | 41.8  | 13.8 to 75.1  | 0.6 | 0.2 to 1.1 |
| Bangladesh | Both   | 1 to 4   | 0.8 | 0.6 to 1.1  | 5.9   | 2.5 to 11.6   | 0.1 | 0.0 to 0.1 |
| Bangladesh | Both   | 5 to 9   | 2.6 | 1.8 to 3.5  | 9.7   | 3.5 to 20.0   | 0.1 | 0.0 to 0.2 |
| Bangladesh | Both   | 10 to 14 | 5.2 | 3.8 to 6.8  | 44.1  | 25.6 to 67.0  | 0.6 | 0.3 to 0.9 |
| Bangladesh | Both   | 15 to 19 | 8.2 | 6.0 to 10.8 | 98.7  | 62.5 to 146.4 | 1.4 | 0.9 to 2.1 |
| Bhutan     | Male   | 1 to 4   | 1.1 | 0.7 to 1.6  | 61.9  | 21.7 to 140.6 | 0.7 | 0.3 to 1.7 |
| Bhutan     | Male   | 5 to 9   | 3.2 | 2.1 to 4.8  | 18.9  | 8.5 to 37.7   | 0.2 | 0.1 to 0.5 |
| Bhutan     | Male   | 10 to 14 | 6.1 | 4.1 to 8.6  | 72    | 36.1 to 131.4 | 1   | 0.5 to 1.8 |
| Bhutan     | Male   | 15 to 19 | 9.3 | 6.1 to 13.4 | 116.6 | 57.0 to 220.8 | 1.7 | 0.8 to 3.2 |
| Bhutan     | Female | 1 to 4   | 0.7 | 0.4 to 1.1  | 53.9  | 16.8 to 156.6 | 0.6 | 0.2 to 1.9 |
| Bhutan     | Female | 5 to 9   | 2.3 | 1.4 to 3.3  | 52.2  | 21.8 to 114.6 | 0.7 | 0.3 to 1.4 |
| Bhutan     | Female | 10 to 14 | 4.6 | 3.0 to 6.6  | 51.9  | 22.7 to 105.7 | 0.7 | 0.3 to 1.4 |
| Bhutan     | Female | 15 to 19 | 7.5 | 4.8 to 10.9 | 66.1  | 25.2 to 131.8 | 0.9 | 0.3 to 1.9 |
| Bhutan     | Both   | 1 to 4   | 0.9 | 0.6 to 1.2  | 58    | 26.1 to 127.1 | 0.7 | 0.3 to 1.5 |
| Bhutan     | Both   | 5 to 9   | 2.8 | 2.0 to 3.7  | 35.3  | 18.7 to 68.7  | 0.4 | 0.2 to 0.9 |
| Bhutan     | Both   | 10 to 14 | 5.4 | 4.1 to 6.9  | 62.1  | 36.1 to 102.0 | 0.8 | 0.5 to 1.4 |
| Bhutan     | Both   | 15 to 19 | 8.4 | 6.2 to 10.9 | 91.7  | 48.2 to 159.8 | 1.3 | 0.7 to 2.3 |
| India      | Male   | 1 to 4   | 1.1 | 0.7 to 1.5  | 69.6  | 31.0 to 133.0 | 0.8 | 0.4 to 1.6 |
| India      | Male   | 5 to 9   | 3.2 | 2.0 to 4.4  | 55.1  | 30.4 to 93.8  | 0.7 | 0.4 to 1.2 |
| India      | Male   | 10 to 14 | 6.1 | 4.1 to 8.6  | 101.3 | 63.0 to 160.3 | 1.4 | 0.8 to 2.1 |
| India      | Male   | 15 to 19 | 9.4 | 5.9 to 13.6 | 152.7 | 90.6 to 244.5 | 2.2 | 1.3 to 3.5 |
| India      | Female | 1 to 4   | 0.7 | 0.5 to 1.0  | 61.9  | 25.9 to 153.2 | 0.7 | 0.3 to 1.8 |
| India      | Female | 5 to 9   | 2.2 | 1.4 to 3.1  | 83.2  | 43.8 to 175.1 | 1   | 0.5 to 2.2 |
| India      | Female | 10 to 14 | 4.5 | 3.0 to 6.3  | 79.9  | 41.8 to 146.3 | 1.1 | 0.6 to 2.0 |
| India      | Female | 15 to 19 | 7.4 | 4.7 to 10.6 | 108.5 | 54.9 to 186.7 | 1.5 | 0.8 to 2.7 |
| India      | Both   | 1 to 4   | 0.9 | 0.7 to 1.2  | 66    | 35.2 to 120.6 | 0.8 | 0.4 to 1.4 |
| India      | Both   | 5 to 9   | 2.7 | 2.0 to 3.5  | 68.4  | 42.7 to 117.0 | 0.9 | 0.5 to 1.5 |
| India      | Both   | 10 to 14 | 5.3 | 4.0 to 6.7  | 91.1  | 60.9 to 136.4 | 1.2 | 0.8 to 1.8 |
| India      | Both   | 15 to 19 | 8.4 | 6.2 to 10.9 | 131.7 | 88.7 to 191.5 | 1.9 | 1.3 to 2.7 |
| Nepal      | Male   | 1 to 4   | 1.1 | 0.7 to 1.6  | 27.2  | 11.5 to 54.5  | 0.3 | 0.1 to 0.6 |
| Nepal      | Male   | 5 to 9   | 3.3 | 2.1 to 4.9  | 12    | 5.7 to 22.0   | 0.1 | 0.1 to 0.3 |
| Nepal      | Male   | 10 to 14 | 6.4 | 4.1 to 9.4  | 49.2  | 26.3 to 88.2  | 0.6 | 0.3 to 1.2 |

|          |        |          |     |             |       |                |     |            |
|----------|--------|----------|-----|-------------|-------|----------------|-----|------------|
| Nepal    | Male   | 15 to 19 | 9.7 | 6.2 to 14.4 | 97.2  | 55.2 to 160.3  | 1.4 | 0.8 to 2.3 |
| Nepal    | Female | 1 to 4   | 0.7 | 0.4 to 1.1  | 15.1  | 5.1 to 38.6    | 0.2 | 0.1 to 0.5 |
| Nepal    | Female | 5 to 9   | 2.2 | 1.4 to 3.2  | 25    | 11.0 to 52.4   | 0.3 | 0.1 to 0.7 |
| Nepal    | Female | 10 to 14 | 4.6 | 2.9 to 6.4  | 27.3  | 13.1 to 52.2   | 0.4 | 0.2 to 0.7 |
| Nepal    | Female | 15 to 19 | 7.5 | 4.6 to 10.7 | 30.8  | 14.1 to 55.3   | 0.4 | 0.2 to 0.8 |
| Nepal    | Both   | 1 to 4   | 0.9 | 0.6 to 1.2  | 21.3  | 10.5 to 39.3   | 0.3 | 0.1 to 0.5 |
| Nepal    | Both   | 5 to 9   | 2.8 | 2.0 to 3.7  | 18.3  | 10.0 to 32.4   | 0.2 | 0.1 to 0.4 |
| Nepal    | Both   | 10 to 14 | 5.5 | 4.1 to 7.1  | 38.5  | 23.1 to 60.3   | 0.5 | 0.3 to 0.8 |
| Nepal    | Both   | 15 to 19 | 8.5 | 6.3 to 11.1 | 63.4  | 38.6 to 94.9   | 0.9 | 0.5 to 1.4 |
| Pakistan | Male   | 1 to 4   | 1   | 0.6 to 1.5  | 61.7  | 22.7 to 130.3  | 0.7 | 0.3 to 1.5 |
| Pakistan | Male   | 5 to 9   | 3.1 | 1.9 to 4.5  | 31.6  | 14.2 to 59.1   | 0.4 | 0.2 to 0.7 |
| Pakistan | Male   | 10 to 14 | 6.2 | 4.1 to 8.8  | 94.1  | 49.4 to 161.1  | 1.3 | 0.7 to 2.1 |
| Pakistan | Male   | 15 to 19 | 9.7 | 6.4 to 13.9 | 117.3 | 60.4 to 204.1  | 1.7 | 0.9 to 2.9 |
| Pakistan | Female | 1 to 4   | 0.7 | 0.4 to 1.1  | 2.6   | 0.8 to 7.3     | 0   | 0.0 to 0.1 |
| Pakistan | Female | 5 to 9   | 2.1 | 1.3 to 3.3  | 39.8  | 10.2 to 130.5  | 0.5 | 0.1 to 1.6 |
| Pakistan | Female | 10 to 14 | 4.2 | 2.8 to 6.2  | 67.6  | 31.2 to 134.8  | 0.9 | 0.4 to 1.8 |
| Pakistan | Female | 15 to 19 | 6.8 | 4.2 to 10.2 | 136.6 | 57.2 to 270.5  | 2   | 0.8 to 3.9 |
| Pakistan | Both   | 1 to 4   | 0.8 | 0.6 to 1.2  | 33.3  | 12.9 to 68.9   | 0.4 | 0.2 to 0.8 |
| Pakistan | Both   | 5 to 9   | 2.6 | 1.9 to 3.4  | 35.5  | 16.2 to 81.3   | 0.4 | 0.2 to 1.0 |
| Pakistan | Both   | 10 to 14 | 5.2 | 3.9 to 6.9  | 81.4  | 48.1 to 127.0  | 1.1 | 0.6 to 1.7 |
| Pakistan | Both   | 15 to 19 | 8.3 | 6.0 to 10.9 | 126.7 | 74.8 to 203.0  | 1.8 | 1.1 to 2.9 |
| Angola   | Male   | 1 to 4   | 0.5 | 0.3 to 0.9  | 309.9 | 96.5 to 755.5  | 3.7 | 1.1 to 8.9 |
| Angola   | Male   | 5 to 9   | 1.6 | 0.9 to 2.5  | 72.5  | 31.7 to 143.1  | 0.9 | 0.4 to 1.8 |
| Angola   | Male   | 10 to 14 | 3   | 1.9 to 4.5  | 79.2  | 41.6 to 145.2  | 1.1 | 0.6 to 1.9 |
| Angola   | Male   | 15 to 19 | 4.4 | 2.6 to 6.7  | 133.8 | 73.8 to 214.4  | 1.9 | 1.1 to 3.1 |
| Angola   | Female | 1 to 4   | 0.3 | 0.2 to 0.5  | 240.9 | 54.7 to 679.7  | 2.9 | 0.6 to 8.1 |
| Angola   | Female | 5 to 9   | 0.9 | 0.5 to 1.4  | 95.1  | 38.5 to 193.0  | 1.2 | 0.5 to 2.4 |
| Angola   | Female | 10 to 14 | 1.7 | 1.0 to 2.7  | 91.9  | 42.3 to 168.1  | 1.2 | 0.6 to 2.3 |
| Angola   | Female | 15 to 19 | 2.7 | 1.5 to 4.3  | 117.8 | 59.5 to 213.5  | 1.7 | 0.9 to 3.1 |
| Angola   | Both   | 1 to 4   | 0.4 | 0.3 to 0.6  | 275.8 | 115.4 to 566.1 | 3.3 | 1.4 to 6.7 |
| Angola   | Both   | 5 to 9   | 1.2 | 0.8 to 1.7  | 83.8  | 41.4 to 144.0  | 1.1 | 0.5 to 1.8 |
| Angola   | Both   | 10 to 14 | 2.4 | 1.6 to 3.3  | 85.6  | 50.8 to 136.4  | 1.1 | 0.7 to 1.8 |
| Angola   | Both   | 15 to 19 | 3.6 | 2.4 to 4.9  | 125.8 | 78.4 to 191.2  | 1.8 | 1.1 to 2.8 |

|                            |        |          |     |            |       |                |     |            |
|----------------------------|--------|----------|-----|------------|-------|----------------|-----|------------|
| Central African Republic   | Male   | 1 to 4   | 0.5 | 0.3 to 0.8 | 115   | 18.9 to 294.4  | 1.4 | 0.2 to 3.5 |
| Central African Republic   | Male   | 5 to 9   | 1.6 | 1.0 to 2.4 | 33.2  | 10.3 to 73.7   | 0.4 | 0.1 to 0.9 |
| Central African Republic   | Male   | 10 to 14 | 3   | 1.9 to 4.7 | 31.2  | 13.2 to 57.6   | 0.4 | 0.2 to 0.8 |
| Central African Republic   | Male   | 15 to 19 | 4.5 | 2.4 to 7.3 | 47.4  | 20.1 to 86.4   | 0.7 | 0.3 to 1.2 |
| Central African Republic   | Female | 1 to 4   | 0.3 | 0.2 to 0.5 | 256.3 | 41.8 to 623.1  | 3   | 0.5 to 7.4 |
| Central African Republic   | Female | 5 to 9   | 0.9 | 0.5 to 1.6 | 92.2  | 25.7 to 184.8  | 1.2 | 0.3 to 2.3 |
| Central African Republic   | Female | 10 to 14 | 1.8 | 1.0 to 2.9 | 78.5  | 24.9 to 154.3  | 1.1 | 0.3 to 2.1 |
| Central African Republic   | Female | 15 to 19 | 2.8 | 1.5 to 4.3 | 107   | 29.8 to 203.3  | 1.5 | 0.4 to 2.9 |
| Central African Republic   | Both   | 1 to 4   | 0.4 | 0.3 to 0.6 | 185.1 | 47.3 to 411.3  | 2.2 | 0.6 to 4.9 |
| Central African Republic   | Both   | 5 to 9   | 1.3 | 0.9 to 1.8 | 62.9  | 23.3 to 113.6  | 0.8 | 0.3 to 1.4 |
| Central African Republic   | Both   | 10 to 14 | 2.4 | 1.7 to 3.2 | 55    | 23.2 to 94.7   | 0.7 | 0.3 to 1.3 |
| Central African Republic   | Both   | 15 to 19 | 3.6 | 2.3 to 5.2 | 77.5  | 32.8 to 131.0  | 1.1 | 0.5 to 1.9 |
| Congo                      | Male   | 1 to 4   | 0.5 | 0.3 to 0.8 | 144.3 | 50.3 to 321.3  | 1.7 | 0.6 to 3.8 |
| Congo                      | Male   | 5 to 9   | 1.5 | 0.9 to 2.4 | 48.1  | 23.4 to 90.0   | 0.6 | 0.3 to 1.1 |
| Congo                      | Male   | 10 to 14 | 2.9 | 1.8 to 4.4 | 55.6  | 31.2 to 93.3   | 0.7 | 0.4 to 1.3 |
| Congo                      | Male   | 15 to 19 | 4.3 | 2.6 to 6.5 | 110.7 | 65.1 to 178.1  | 1.6 | 0.9 to 2.6 |
| Congo                      | Female | 1 to 4   | 0.3 | 0.2 to 0.5 | 86.6  | 22.9 to 214.5  | 1   | 0.3 to 2.5 |
| Congo                      | Female | 5 to 9   | 0.9 | 0.5 to 1.6 | 39.4  | 17.9 to 76.6   | 0.5 | 0.2 to 1.0 |
| Congo                      | Female | 10 to 14 | 1.8 | 1.0 to 2.8 | 40.7  | 19.9 to 77.2   | 0.5 | 0.3 to 1.0 |
| Congo                      | Female | 15 to 19 | 2.8 | 1.5 to 4.5 | 63    | 32.2 to 112.1  | 0.9 | 0.5 to 1.6 |
| Congo                      | Both   | 1 to 4   | 0.4 | 0.2 to 0.6 | 115.8 | 48.6 to 228.7  | 1.4 | 0.6 to 2.7 |
| Congo                      | Both   | 5 to 9   | 1.2 | 0.8 to 1.7 | 43.8  | 24.9 to 76.4   | 0.5 | 0.3 to 1.0 |
| Congo                      | Both   | 10 to 14 | 2.3 | 1.6 to 3.2 | 48.2  | 31.2 to 73.0   | 0.6 | 0.4 to 1.0 |
| Congo                      | Both   | 15 to 19 | 3.5 | 2.4 to 4.8 | 86.9  | 56.8 to 130.4  | 1.2 | 0.8 to 1.9 |
| Democratic Republic of the | Male   | 1 to 4   | 0.5 | 0.3 to 0.9 | 331.2 | 110.6 to 777.2 | 3.9 | 1.3 to 9.2 |
| Democratic Republic of the | Male   | 5 to 9   | 1.6 | 0.9 to 2.5 | 90    | 34.9 to 180.8  | 1.1 | 0.4 to 2.3 |
| Democratic Republic of the | Male   | 10 to 14 | 3.1 | 1.9 to 4.6 | 87.5  | 38.7 to 151.5  | 1.2 | 0.5 to 2.0 |
| Democratic Republic of the | Male   | 15 to 19 | 4.6 | 2.7 to 6.8 | 149.5 | 78.3 to 239.2  | 2.1 | 1.1 to 3.4 |
| Democratic Republic of the | Female | 1 to 4   | 0.3 | 0.1 to 0.5 | 277.9 | 57.0 to 730.8  | 3.3 | 0.7 to 8.7 |
| Democratic Republic of the | Female | 5 to 9   | 0.8 | 0.4 to 1.5 | 113.5 | 44.3 to 222.9  | 1.4 | 0.6 to 2.8 |
| Democratic Republic of the | Female | 10 to 14 | 1.7 | 1.0 to 2.8 | 97.8  | 46.0 to 176.4  | 1.3 | 0.6 to 2.4 |
| Democratic Republic of the | Female | 15 to 19 | 2.7 | 1.5 to 4.2 | 144.3 | 76.0 to 251.1  | 2.1 | 1.1 to 3.6 |
| Democratic Republic of the | Both   | 1 to 4   | 0.4 | 0.3 to 0.6 | 304.7 | 127.5 to 633.2 | 3.6 | 1.5 to 7.5 |

|                            |        |          |     |            |       |                |     |            |
|----------------------------|--------|----------|-----|------------|-------|----------------|-----|------------|
| Democratic Republic of the | Both   | 5 to 9   | 1.2 | 0.8 to 1.8 | 101.7 | 52.0 to 181.9  | 1.3 | 0.7 to 2.3 |
| Democratic Republic of the | Both   | 10 to 14 | 2.4 | 1.6 to 3.3 | 92.6  | 51.8 to 147.2  | 1.2 | 0.7 to 2.0 |
| Democratic Republic of the | Both   | 15 to 19 | 3.6 | 2.4 to 5.0 | 146.9 | 93.5 to 216.9  | 2.1 | 1.3 to 3.1 |
| Equatorial Guinea          | Male   | 1 to 4   | 0.5 | 0.3 to 0.8 | 291.6 | 58.5 to 770.2  | 3.5 | 0.7 to 9.1 |
| Equatorial Guinea          | Male   | 5 to 9   | 1.6 | 1.0 to 2.4 | 90.1  | 35.9 to 200.1  | 1.1 | 0.4 to 2.5 |
| Equatorial Guinea          | Male   | 10 to 14 | 2.9 | 1.9 to 4.4 | 80.8  | 38.0 to 164.7  | 1.1 | 0.5 to 2.2 |
| Equatorial Guinea          | Male   | 15 to 19 | 4.3 | 2.5 to 6.8 | 112.5 | 59.2 to 197.6  | 1.6 | 0.8 to 2.8 |
| Equatorial Guinea          | Female | 1 to 4   | 0.3 | 0.1 to 0.5 | 230.8 | 30.2 to 814.3  | 2.7 | 0.4 to 9.6 |
| Equatorial Guinea          | Female | 5 to 9   | 0.8 | 0.4 to 1.3 | 72.1  | 23.2 to 166.7  | 0.9 | 0.3 to 2.1 |
| Equatorial Guinea          | Female | 10 to 14 | 1.7 | 1.0 to 2.5 | 60.2  | 23.2 to 129.5  | 0.8 | 0.3 to 1.7 |
| Equatorial Guinea          | Female | 15 to 19 | 2.7 | 1.5 to 4.3 | 95.6  | 36.6 to 197.3  | 1.4 | 0.5 to 2.8 |
| Equatorial Guinea          | Both   | 1 to 4   | 0.4 | 0.2 to 0.6 | 261.5 | 79.2 to 650.4  | 3.1 | 0.9 to 7.7 |
| Equatorial Guinea          | Both   | 5 to 9   | 1.2 | 0.8 to 1.7 | 81.1  | 37.9 to 152.1  | 1   | 0.5 to 1.9 |
| Equatorial Guinea          | Both   | 10 to 14 | 2.3 | 1.7 to 3.2 | 70.6  | 37.4 to 126.6  | 0.9 | 0.5 to 1.7 |
| Equatorial Guinea          | Both   | 15 to 19 | 3.5 | 2.4 to 5.0 | 104.1 | 54.3 to 177.0  | 1.5 | 0.8 to 2.5 |
| Gabon                      | Male   | 1 to 4   | 0.5 | 0.3 to 0.9 | 174.1 | 58.2 to 401.3  | 2.1 | 0.7 to 4.8 |
| Gabon                      | Male   | 5 to 9   | 1.7 | 1.0 to 2.5 | 65.6  | 28.6 to 131.3  | 0.8 | 0.4 to 1.7 |
| Gabon                      | Male   | 10 to 14 | 3.1 | 1.7 to 4.5 | 86.7  | 47.8 to 145.4  | 1.2 | 0.6 to 2.0 |
| Gabon                      | Male   | 15 to 19 | 4.5 | 2.3 to 6.9 | 205.3 | 113.1 to 353.5 | 3   | 1.6 to 5.1 |
| Gabon                      | Female | 1 to 4   | 0.3 | 0.1 to 0.5 | 107.8 | 27.1 to 285.7  | 1.3 | 0.3 to 3.4 |
| Gabon                      | Female | 5 to 9   | 0.9 | 0.4 to 1.5 | 45.2  | 18.2 to 92.2   | 0.6 | 0.2 to 1.2 |
| Gabon                      | Female | 10 to 14 | 1.7 | 1.0 to 2.8 | 52.7  | 24.9 to 106.3  | 0.7 | 0.3 to 1.4 |
| Gabon                      | Female | 15 to 19 | 2.8 | 1.5 to 4.5 | 94.5  | 48.4 to 172.2  | 1.4 | 0.7 to 2.5 |
| Gabon                      | Both   | 1 to 4   | 0.4 | 0.3 to 0.6 | 141.3 | 61.1 to 281.0  | 1.7 | 0.7 to 3.3 |
| Gabon                      | Both   | 5 to 9   | 1.3 | 0.8 to 1.7 | 55.5  | 29.8 to 94.6   | 0.7 | 0.4 to 1.2 |
| Gabon                      | Both   | 10 to 14 | 2.4 | 1.7 to 3.2 | 69.9  | 44.0 to 104.8  | 0.9 | 0.6 to 1.4 |
| Gabon                      | Both   | 15 to 19 | 3.6 | 2.4 to 5.0 | 150.4 | 92.8 to 231.8  | 2.2 | 1.3 to 3.3 |
| Burundi                    | Male   | 1 to 4   | 0.7 | 0.4 to 1.1 | 34.2  | 10.5 to 82.0   | 0.4 | 0.1 to 1.0 |
| Burundi                    | Male   | 5 to 9   | 1.9 | 1.1 to 3.0 | 27.1  | 11.1 to 54.2   | 0.3 | 0.1 to 0.7 |
| Burundi                    | Male   | 10 to 14 | 3.4 | 1.9 to 5.2 | 35.3  | 16.5 to 66.1   | 0.5 | 0.2 to 0.9 |
| Burundi                    | Male   | 15 to 19 | 4.6 | 2.4 to 7.7 | 98    | 53.9 to 163.5  | 1.4 | 0.8 to 2.3 |
| Burundi                    | Female | 1 to 4   | 0.3 | 0.2 to 0.5 | 24.6  | 4.8 to 81.2    | 0.3 | 0.1 to 1.0 |
| Burundi                    | Female | 5 to 9   | 0.9 | 0.4 to 1.4 | 17.2  | 5.8 to 39.7    | 0.2 | 0.1 to 0.5 |

|          |        |          |     |            |       |               |     |            |
|----------|--------|----------|-----|------------|-------|---------------|-----|------------|
| Burundi  | Female | 10 to 14 | 1.7 | 0.9 to 2.7 | 18.8  | 7.8 to 38.6   | 0.2 | 0.1 to 0.5 |
| Burundi  | Female | 15 to 19 | 2.5 | 1.1 to 4.3 | 47.2  | 22.1 to 89.5  | 0.7 | 0.3 to 1.3 |
| Burundi  | Both   | 1 to 4   | 0.5 | 0.3 to 0.7 | 29.4  | 11.5 to 63.4  | 0.3 | 0.1 to 0.8 |
| Burundi  | Both   | 5 to 9   | 1.4 | 0.9 to 2.0 | 22.1  | 11.5 to 38.4  | 0.3 | 0.1 to 0.5 |
| Burundi  | Both   | 10 to 14 | 2.5 | 1.7 to 3.6 | 27    | 15.7 to 44.7  | 0.4 | 0.2 to 0.6 |
| Burundi  | Both   | 15 to 19 | 3.5 | 2.2 to 5.2 | 72.1  | 44.0 to 107.6 | 1   | 0.6 to 1.5 |
| Comoros  | Male   | 1 to 4   | 0.6 | 0.4 to 1.0 | 8.2   | 1.3 to 22.2   | 0.1 | 0.0 to 0.3 |
| Comoros  | Male   | 5 to 9   | 1.9 | 1.1 to 2.9 | 17.4  | 5.9 to 38.6   | 0.2 | 0.1 to 0.5 |
| Comoros  | Male   | 10 to 14 | 3.3 | 1.9 to 5.0 | 33.6  | 14.3 to 59.6  | 0.4 | 0.2 to 0.8 |
| Comoros  | Male   | 15 to 19 | 4.5 | 2.3 to 7.9 | 134.5 | 77.8 to 216.8 | 1.9 | 1.1 to 3.1 |
| Comoros  | Female | 1 to 4   | 0.3 | 0.1 to 0.5 | 3.5   | 0.4 to 13.6   | 0   | 0.0 to 0.2 |
| Comoros  | Female | 5 to 9   | 0.9 | 0.4 to 1.4 | 7     | 1.9 to 18.7   | 0.1 | 0.0 to 0.2 |
| Comoros  | Female | 10 to 14 | 1.7 | 0.9 to 2.6 | 14.4  | 5.2 to 34.5   | 0.2 | 0.1 to 0.5 |
| Comoros  | Female | 15 to 19 | 2.6 | 1.3 to 4.3 | 47.6  | 20.9 to 95.3  | 0.7 | 0.3 to 1.4 |
| Comoros  | Both   | 1 to 4   | 0.5 | 0.3 to 0.6 | 5.9   | 0.9 to 14.4   | 0.1 | 0.0 to 0.2 |
| Comoros  | Both   | 5 to 9   | 1.4 | 0.9 to 1.9 | 12.3  | 4.6 to 25.3   | 0.2 | 0.1 to 0.3 |
| Comoros  | Both   | 10 to 14 | 2.5 | 1.7 to 3.5 | 24.2  | 12.2 to 41.8  | 0.3 | 0.2 to 0.6 |
| Comoros  | Both   | 15 to 19 | 3.5 | 2.2 to 5.5 | 91.7  | 55.5 to 140.0 | 1.3 | 0.8 to 2.0 |
| Djibouti | Male   | 1 to 4   | 0.7 | 0.4 to 1.2 | 18.8  | 4.9 to 52.4   | 0.2 | 0.1 to 0.6 |
| Djibouti | Male   | 5 to 9   | 1.9 | 1.1 to 3.2 | 22.1  | 9.7 to 41.9   | 0.3 | 0.1 to 0.5 |
| Djibouti | Male   | 10 to 14 | 3.4 | 2.1 to 5.2 | 29.2  | 15.1 to 51.2  | 0.4 | 0.2 to 0.7 |
| Djibouti | Male   | 15 to 19 | 4.7 | 2.7 to 7.3 | 98.7  | 53.6 to 167.3 | 1.4 | 0.8 to 2.4 |
| Djibouti | Female | 1 to 4   | 0.3 | 0.2 to 0.5 | 13.3  | 3.1 to 36.7   | 0.2 | 0.0 to 0.4 |
| Djibouti | Female | 5 to 9   | 0.9 | 0.5 to 1.3 | 15.3  | 5.8 to 36.7   | 0.2 | 0.1 to 0.5 |
| Djibouti | Female | 10 to 14 | 1.7 | 0.9 to 2.6 | 18.2  | 7.7 to 38.6   | 0.2 | 0.1 to 0.5 |
| Djibouti | Female | 15 to 19 | 2.5 | 1.3 to 4.1 | 56.4  | 22.6 to 117.6 | 0.8 | 0.3 to 1.7 |
| Djibouti | Both   | 1 to 4   | 0.5 | 0.3 to 0.8 | 16.1  | 5.6 to 35.6   | 0.2 | 0.1 to 0.4 |
| Djibouti | Both   | 5 to 9   | 1.4 | 0.9 to 2.1 | 18.7  | 9.8 to 34.1   | 0.2 | 0.1 to 0.4 |
| Djibouti | Both   | 10 to 14 | 2.5 | 1.7 to 3.5 | 23.8  | 13.3 to 38.6  | 0.3 | 0.2 to 0.5 |
| Djibouti | Both   | 15 to 19 | 3.6 | 2.3 to 5.0 | 77.8  | 46.1 to 125.9 | 1.1 | 0.7 to 1.8 |
| Eritrea  | Male   | 1 to 4   | 0.7 | 0.4 to 1.0 | 14.4  | 3.6 to 36.0   | 0.2 | 0.0 to 0.4 |
| Eritrea  | Male   | 5 to 9   | 1.9 | 1.1 to 3.0 | 10.8  | 3.8 to 22.2   | 0.1 | 0.0 to 0.3 |
| Eritrea  | Male   | 10 to 14 | 3.3 | 1.9 to 5.0 | 17.9  | 8.2 to 32.3   | 0.2 | 0.1 to 0.4 |

|          |        |          |     |            |      |               |     |            |
|----------|--------|----------|-----|------------|------|---------------|-----|------------|
| Eritrea  | Male   | 15 to 19 | 4.5 | 2.5 to 7.4 | 70   | 36.3 to 118.1 | 1   | 0.5 to 1.7 |
| Eritrea  | Female | 1 to 4   | 0.3 | 0.2 to 0.4 | 11.8 | 2.2 to 50.9   | 0.1 | 0.0 to 0.6 |
| Eritrea  | Female | 5 to 9   | 0.9 | 0.5 to 1.4 | 9.3  | 2.3 to 30.9   | 0.1 | 0.0 to 0.4 |
| Eritrea  | Female | 10 to 14 | 1.6 | 0.9 to 2.6 | 15.1 | 5.4 to 38.4   | 0.2 | 0.1 to 0.5 |
| Eritrea  | Female | 15 to 19 | 2.3 | 1.3 to 4.0 | 39   | 13.1 to 87.6  | 0.6 | 0.2 to 1.3 |
| Eritrea  | Both   | 1 to 4   | 0.5 | 0.3 to 0.7 | 13.1 | 3.6 to 33.7   | 0.2 | 0.0 to 0.4 |
| Eritrea  | Both   | 5 to 9   | 1.4 | 0.9 to 2.0 | 10   | 3.7 to 21.2   | 0.1 | 0.0 to 0.3 |
| Eritrea  | Both   | 10 to 14 | 2.5 | 1.7 to 3.5 | 16.5 | 8.6 to 29.4   | 0.2 | 0.1 to 0.4 |
| Eritrea  | Both   | 15 to 19 | 3.5 | 2.2 to 5.0 | 54.7 | 31.9 to 88.9  | 0.8 | 0.5 to 1.3 |
| Ethiopia | Male   | 1 to 4   | 0.6 | 0.3 to 0.8 | 9.6  | 2.7 to 23.1   | 0.1 | 0.0 to 0.3 |
| Ethiopia | Male   | 5 to 9   | 1.4 | 0.7 to 2.1 | 11.7 | 4.7 to 22.9   | 0.1 | 0.1 to 0.3 |
| Ethiopia | Male   | 10 to 14 | 2.1 | 1.2 to 3.0 | 15.3 | 7.8 to 26.3   | 0.2 | 0.1 to 0.3 |
| Ethiopia | Male   | 15 to 19 | 2.4 | 1.4 to 3.7 | 59.9 | 32.5 to 97.2  | 0.9 | 0.5 to 1.4 |
| Ethiopia | Female | 1 to 4   | 0.2 | 0.1 to 0.4 | 8.4  | 1.8 to 22.4   | 0.1 | 0.0 to 0.3 |
| Ethiopia | Female | 5 to 9   | 0.6 | 0.4 to 0.9 | 7.4  | 2.7 to 16.0   | 0.1 | 0.0 to 0.2 |
| Ethiopia | Female | 10 to 14 | 1   | 0.6 to 1.5 | 8.5  | 3.9 to 16.6   | 0.1 | 0.1 to 0.2 |
| Ethiopia | Female | 15 to 19 | 1.3 | 0.8 to 1.9 | 22.3 | 10.8 to 40.1  | 0.3 | 0.2 to 0.6 |
| Ethiopia | Both   | 1 to 4   | 0.4 | 0.3 to 0.5 | 9    | 2.8 to 20.1   | 0.1 | 0.0 to 0.2 |
| Ethiopia | Both   | 5 to 9   | 1   | 0.7 to 1.4 | 9.6  | 4.5 to 16.8   | 0.1 | 0.1 to 0.2 |
| Ethiopia | Both   | 10 to 14 | 1.6 | 1.1 to 2.1 | 11.9 | 6.8 to 18.9   | 0.2 | 0.1 to 0.3 |
| Ethiopia | Both   | 15 to 19 | 1.9 | 1.3 to 2.6 | 41.3 | 25.7 to 61.0  | 0.6 | 0.4 to 0.9 |
| Kenya    | Male   | 1 to 4   | 0.7 | 0.4 to 1.1 | 10.1 | 3.8 to 22.1   | 0.1 | 0.0 to 0.3 |
| Kenya    | Male   | 5 to 9   | 2   | 1.1 to 3.1 | 12.2 | 5.5 to 23.4   | 0.1 | 0.1 to 0.3 |
| Kenya    | Male   | 10 to 14 | 3.6 | 2.1 to 5.5 | 14.2 | 7.1 to 24.9   | 0.2 | 0.1 to 0.3 |
| Kenya    | Male   | 15 to 19 | 5   | 2.9 to 8.3 | 47.6 | 26.4 to 77.5  | 0.7 | 0.4 to 1.1 |
| Kenya    | Female | 1 to 4   | 0.3 | 0.1 to 0.5 | 8.3  | 2.6 to 19.9   | 0.1 | 0.0 to 0.2 |
| Kenya    | Female | 5 to 9   | 0.9 | 0.4 to 1.4 | 5.7  | 2.6 to 12.4   | 0.1 | 0.0 to 0.2 |
| Kenya    | Female | 10 to 14 | 1.7 | 0.9 to 2.6 | 5.2  | 2.4 to 9.8    | 0.1 | 0.0 to 0.1 |
| Kenya    | Female | 15 to 19 | 2.4 | 1.3 to 4.1 | 19.5 | 8.9 to 38.0   | 0.3 | 0.1 to 0.5 |
| Kenya    | Both   | 1 to 4   | 0.5 | 0.3 to 0.7 | 9.2  | 4.0 to 17.5   | 0.1 | 0.0 to 0.2 |
| Kenya    | Both   | 5 to 9   | 1.4 | 0.9 to 2.0 | 9    | 4.8 to 16.0   | 0.1 | 0.1 to 0.2 |
| Kenya    | Both   | 10 to 14 | 2.6 | 1.7 to 3.7 | 9.7  | 5.6 to 15.8   | 0.1 | 0.1 to 0.2 |
| Kenya    | Both   | 15 to 19 | 3.8 | 2.4 to 5.5 | 33.6 | 20.8 to 50.8  | 0.5 | 0.3 to 0.7 |

|            |        |          |      |             |       |                |     |             |
|------------|--------|----------|------|-------------|-------|----------------|-----|-------------|
| Madagascar | Male   | 1 to 4   | 0.6  | 0.3 to 0.9  | 33.7  | 9.5 to 77.6    | 0.4 | 0.1 to 0.9  |
| Madagascar | Male   | 5 to 9   | 1.8  | 1.0 to 2.8  | 35    | 13.9 to 66.4   | 0.4 | 0.2 to 0.8  |
| Madagascar | Male   | 10 to 14 | 3.1  | 1.9 to 5.0  | 80.8  | 39.1 to 144.7  | 1.1 | 0.5 to 1.9  |
| Madagascar | Male   | 15 to 19 | 4.2  | 2.2 to 7.4  | 446.3 | 258.8 to 700.9 | 6.4 | 3.7 to 10.1 |
| Madagascar | Female | 1 to 4   | 0.3  | 0.1 to 0.4  | 23.4  | 4.7 to 86.5    | 0.3 | 0.1 to 1.0  |
| Madagascar | Female | 5 to 9   | 0.8  | 0.4 to 1.2  | 23.2  | 7.5 to 59.0    | 0.3 | 0.1 to 0.7  |
| Madagascar | Female | 10 to 14 | 1.6  | 0.9 to 2.4  | 47.5  | 20.3 to 97.3   | 0.6 | 0.3 to 1.3  |
| Madagascar | Female | 15 to 19 | 2.3  | 1.2 to 4.0  | 175.7 | 80.5 to 322.1  | 2.5 | 1.2 to 4.6  |
| Madagascar | Both   | 1 to 4   | 0.4  | 0.3 to 0.6  | 28.6  | 8.9 to 68.0    | 0.3 | 0.1 to 0.8  |
| Madagascar | Both   | 5 to 9   | 1.3  | 0.9 to 1.9  | 29.1  | 12.9 to 52.1   | 0.4 | 0.2 to 0.7  |
| Madagascar | Both   | 10 to 14 | 2.4  | 1.6 to 3.3  | 64.2  | 35.0 to 108.0  | 0.9 | 0.5 to 1.4  |
| Madagascar | Both   | 15 to 19 | 3.3  | 2.1 to 4.9  | 310.7 | 196.5 to 452.8 | 4.5 | 2.8 to 6.5  |
| Malawi     | Male   | 1 to 4   | 0.6  | 0.3 to 1.1  | 38.4  | 12.5 to 88.0   | 0.5 | 0.1 to 1.0  |
| Malawi     | Male   | 5 to 9   | 1.9  | 1.1 to 3.1  | 19.2  | 7.8 to 40.0    | 0.2 | 0.1 to 0.5  |
| Malawi     | Male   | 10 to 14 | 3.3  | 1.9 to 5.5  | 17    | 8.8 to 30.5    | 0.2 | 0.1 to 0.4  |
| Malawi     | Male   | 15 to 19 | 4.5  | 2.4 to 7.8  | 45    | 22.9 to 77.0   | 0.6 | 0.3 to 1.1  |
| Malawi     | Female | 1 to 4   | 0.3  | 0.2 to 0.5  | 24    | 6.0 to 72.1    | 0.3 | 0.1 to 0.9  |
| Malawi     | Female | 5 to 9   | 0.9  | 0.5 to 1.4  | 11.2  | 4.2 to 25.2    | 0.1 | 0.1 to 0.3  |
| Malawi     | Female | 10 to 14 | 1.7  | 0.9 to 2.6  | 7.2   | 3.3 to 14.0    | 0.1 | 0.0 to 0.2  |
| Malawi     | Female | 15 to 19 | 2.6  | 1.3 to 4.2  | 27.9  | 14.5 to 49.8   | 0.4 | 0.2 to 0.7  |
| Malawi     | Both   | 1 to 4   | 0.5  | 0.3 to 0.7  | 31.3  | 11.9 to 63.8   | 0.4 | 0.1 to 0.8  |
| Malawi     | Both   | 5 to 9   | 1.4  | 0.9 to 2.0  | 15.3  | 7.6 to 27.8    | 0.2 | 0.1 to 0.3  |
| Malawi     | Both   | 10 to 14 | 2.5  | 1.7 to 3.6  | 12.1  | 6.9 to 21.1    | 0.2 | 0.1 to 0.3  |
| Malawi     | Both   | 15 to 19 | 3.6  | 2.3 to 5.5  | 36.5  | 22.3 to 57.4   | 0.5 | 0.3 to 0.8  |
| Mauritius  | Male   | 1 to 4   | 1.3  | 0.9 to 1.8  | 22.9  | 10.2 to 40.8   | 0.3 | 0.1 to 0.5  |
| Mauritius  | Male   | 5 to 9   | 3.9  | 2.7 to 5.3  | 16    | 10.1 to 23.7   | 0.2 | 0.1 to 0.3  |
| Mauritius  | Male   | 10 to 14 | 7.9  | 5.5 to 10.4 | 36.4  | 22.4 to 55.2   | 0.5 | 0.3 to 0.7  |
| Mauritius  | Male   | 15 to 19 | 12.6 | 8.5 to 16.7 | 65.6  | 40.8 to 98.3   | 0.9 | 0.6 to 1.4  |
| Mauritius  | Female | 1 to 4   | 0.7  | 0.5 to 1.0  | 8.7   | 4.0 to 14.3    | 0.1 | 0.0 to 0.2  |
| Mauritius  | Female | 5 to 9   | 2.3  | 1.6 to 3.1  | 15.1  | 9.1 to 27.3    | 0.2 | 0.1 to 0.3  |
| Mauritius  | Female | 10 to 14 | 4.7  | 3.3 to 6.7  | 28.1  | 16.7 to 54.8   | 0.4 | 0.2 to 0.7  |
| Mauritius  | Female | 15 to 19 | 7.8  | 5.0 to 11.3 | 44.2  | 28.8 to 67.0   | 0.6 | 0.4 to 1.0  |
| Mauritius  | Both   | 1 to 4   | 1    | 0.8 to 1.3  | 15.9  | 7.6 to 26.3    | 0.2 | 0.1 to 0.3  |

|            |        |          |      |             |       |                |     |            |
|------------|--------|----------|------|-------------|-------|----------------|-----|------------|
| Mauritius  | Both   | 5 to 9   | 3.1  | 2.4 to 3.9  | 15.5  | 10.3 to 23.7   | 0.2 | 0.1 to 0.3 |
| Mauritius  | Both   | 10 to 14 | 6.3  | 4.9 to 7.8  | 32.3  | 21.4 to 50.6   | 0.4 | 0.3 to 0.7 |
| Mauritius  | Both   | 15 to 19 | 10.2 | 7.8 to 12.9 | 55    | 40.0 to 74.4   | 0.8 | 0.6 to 1.0 |
| Mozambique | Male   | 1 to 4   | 0.7  | 0.4 to 1.0  | 6.7   | 2.1 to 17.2    | 0.1 | 0.0 to 0.2 |
| Mozambique | Male   | 5 to 9   | 2.1  | 1.3 to 3.1  | 8.9   | 3.4 to 20.4    | 0.1 | 0.0 to 0.3 |
| Mozambique | Male   | 10 to 14 | 3.5  | 2.1 to 5.4  | 12.4  | 5.2 to 29.3    | 0.2 | 0.1 to 0.4 |
| Mozambique | Male   | 15 to 19 | 4.7  | 2.5 to 7.5  | 55    | 28.6 to 91.2   | 0.8 | 0.4 to 1.3 |
| Mozambique | Female | 1 to 4   | 0.3  | 0.2 to 0.5  | 7.3   | 1.8 to 18.3    | 0.1 | 0.0 to 0.2 |
| Mozambique | Female | 5 to 9   | 0.9  | 0.5 to 1.4  | 6.7   | 2.4 to 16.8    | 0.1 | 0.0 to 0.2 |
| Mozambique | Female | 10 to 14 | 1.7  | 1.0 to 2.5  | 5.7   | 2.5 to 13.2    | 0.1 | 0.0 to 0.2 |
| Mozambique | Female | 15 to 19 | 2.5  | 1.4 to 4.1  | 21.5  | 10.0 to 37.9   | 0.3 | 0.1 to 0.5 |
| Mozambique | Both   | 1 to 4   | 0.5  | 0.3 to 0.7  | 7     | 2.9 to 14.1    | 0.1 | 0.0 to 0.2 |
| Mozambique | Both   | 5 to 9   | 1.5  | 1.0 to 2.0  | 7.8   | 3.6 to 17.0    | 0.1 | 0.0 to 0.2 |
| Mozambique | Both   | 10 to 14 | 2.6  | 1.8 to 3.6  | 9     | 4.6 to 20.6    | 0.1 | 0.1 to 0.3 |
| Mozambique | Both   | 15 to 19 | 3.6  | 2.3 to 5.3  | 38.2  | 23.0 to 58.7   | 0.5 | 0.3 to 0.8 |
| Rwanda     | Male   | 1 to 4   | 0.7  | 0.4 to 1.0  | 20.8  | 6.2 to 52.2    | 0.2 | 0.1 to 0.6 |
| Rwanda     | Male   | 5 to 9   | 2    | 1.2 to 3.0  | 17.8  | 7.8 to 35.6    | 0.2 | 0.1 to 0.4 |
| Rwanda     | Male   | 10 to 14 | 3.4  | 1.8 to 5.2  | 22.1  | 11.1 to 39.4   | 0.3 | 0.1 to 0.5 |
| Rwanda     | Male   | 15 to 19 | 4.5  | 2.1 to 7.9  | 68.5  | 37.1 to 116.6  | 1   | 0.5 to 1.7 |
| Rwanda     | Female | 1 to 4   | 0.3  | 0.2 to 0.5  | 12.9  | 2.6 to 46.3    | 0.2 | 0.0 to 0.5 |
| Rwanda     | Female | 5 to 9   | 0.9  | 0.5 to 1.4  | 10.2  | 3.3 to 28.0    | 0.1 | 0.0 to 0.4 |
| Rwanda     | Female | 10 to 14 | 1.7  | 0.9 to 2.6  | 9.3   | 3.9 to 21.9    | 0.1 | 0.0 to 0.3 |
| Rwanda     | Female | 15 to 19 | 2.5  | 1.4 to 4.0  | 28.3  | 12.8 to 59.7   | 0.4 | 0.2 to 0.9 |
| Rwanda     | Both   | 1 to 4   | 0.5  | 0.3 to 0.7  | 16.9  | 5.6 to 39.2    | 0.2 | 0.1 to 0.5 |
| Rwanda     | Both   | 5 to 9   | 1.4  | 1.0 to 2.0  | 14    | 7.1 to 26.5    | 0.2 | 0.1 to 0.3 |
| Rwanda     | Both   | 10 to 14 | 2.5  | 1.7 to 3.4  | 15.7  | 9.2 to 25.6    | 0.2 | 0.1 to 0.3 |
| Rwanda     | Both   | 15 to 19 | 3.4  | 2.2 to 5.2  | 48.1  | 29.5 to 74.3   | 0.7 | 0.4 to 1.1 |
| Seychelles | Male   | 1 to 4   | 1.4  | 0.9 to 1.9  | 66.7  | 35.9 to 114.2  | 0.8 | 0.4 to 1.4 |
| Seychelles | Male   | 5 to 9   | 4.1  | 3.0 to 5.5  | 18.6  | 11.6 to 28.9   | 0.2 | 0.1 to 0.4 |
| Seychelles | Male   | 10 to 14 | 8.1  | 5.8 to 10.7 | 31.1  | 19.3 to 47.2   | 0.4 | 0.2 to 0.6 |
| Seychelles | Male   | 15 to 19 | 13   | 9.2 to 17.8 | 207.5 | 126.1 to 313.2 | 3   | 1.8 to 4.5 |
| Seychelles | Female | 1 to 4   | 0.8  | 0.5 to 1.1  | 64.2  | 37.5 to 109.5  | 0.8 | 0.4 to 1.3 |
| Seychelles | Female | 5 to 9   | 2.4  | 1.6 to 3.2  | 62.9  | 40.2 to 98.5   | 0.8 | 0.5 to 1.2 |

|            |        |          |      |             |       |                |     |            |
|------------|--------|----------|------|-------------|-------|----------------|-----|------------|
| Seychelles | Female | 10 to 14 | 4.9  | 3.4 to 6.4  | 29.7  | 8.1 to 53.9    | 0.4 | 0.1 to 0.7 |
| Seychelles | Female | 15 to 19 | 8.1  | 5.6 to 11.2 | 102.6 | 56.6 to 171.2  | 1.5 | 0.8 to 2.4 |
| Seychelles | Both   | 1 to 4   | 1.1  | 0.8 to 1.4  | 65.5  | 40.7 to 98.9   | 0.8 | 0.5 to 1.2 |
| Seychelles | Both   | 5 to 9   | 3.3  | 2.5 to 4.1  | 40.3  | 27.9 to 58.7   | 0.5 | 0.3 to 0.7 |
| Seychelles | Both   | 10 to 14 | 6.5  | 5.1 to 8.2  | 30.4  | 17.7 to 43.1   | 0.4 | 0.2 to 0.6 |
| Seychelles | Both   | 15 to 19 | 10.6 | 8.2 to 13.7 | 157.1 | 108.1 to 227.6 | 2.2 | 1.5 to 3.3 |
| Somalia    | Male   | 1 to 4   | 0.7  | 0.4 to 1.1  | 33.8  | 9.6 to 82.8    | 0.4 | 0.1 to 1.0 |
| Somalia    | Male   | 5 to 9   | 2    | 1.2 to 3.0  | 26.1  | 10.5 to 54.7   | 0.3 | 0.1 to 0.7 |
| Somalia    | Male   | 10 to 14 | 3.5  | 2.2 to 5.2  | 35    | 16.7 to 65.2   | 0.5 | 0.2 to 0.9 |
| Somalia    | Male   | 15 to 19 | 4.7  | 2.7 to 7.6  | 93.1  | 44.9 to 168.1  | 1.3 | 0.6 to 2.4 |
| Somalia    | Female | 1 to 4   | 0.3  | 0.1 to 0.5  | 22.9  | 5.9 to 56.0    | 0.3 | 0.1 to 0.7 |
| Somalia    | Female | 5 to 9   | 0.9  | 0.4 to 1.4  | 18.2  | 7.1 to 36.8    | 0.2 | 0.1 to 0.5 |
| Somalia    | Female | 10 to 14 | 1.7  | 0.9 to 2.7  | 22.2  | 9.5 to 42.6    | 0.3 | 0.1 to 0.6 |
| Somalia    | Female | 15 to 19 | 2.5  | 1.3 to 4.1  | 50.6  | 20.5 to 98.2   | 0.7 | 0.3 to 1.4 |
| Somalia    | Both   | 1 to 4   | 0.5  | 0.3 to 0.7  | 28.4  | 11.0 to 61.2   | 0.3 | 0.1 to 0.7 |
| Somalia    | Both   | 5 to 9   | 1.4  | 1.0 to 2.1  | 22.1  | 11.1 to 39.4   | 0.3 | 0.1 to 0.5 |
| Somalia    | Both   | 10 to 14 | 2.6  | 1.8 to 3.6  | 28.6  | 16.3 to 47.7   | 0.4 | 0.2 to 0.6 |
| Somalia    | Both   | 15 to 19 | 3.6  | 2.3 to 5.3  | 71.9  | 39.5 to 120.2  | 1   | 0.6 to 1.7 |
| Tanzania   | Male   | 1 to 4   | 0.7  | 0.3 to 1.0  | 14.8  | 5.2 to 35.2    | 0.2 | 0.1 to 0.4 |
| Tanzania   | Male   | 5 to 9   | 2    | 1.0 to 3.2  | 14.3  | 6.0 to 29.8    | 0.2 | 0.1 to 0.4 |
| Tanzania   | Male   | 10 to 14 | 3.6  | 2.0 to 5.6  | 14.7  | 7.6 to 26.1    | 0.2 | 0.1 to 0.3 |
| Tanzania   | Male   | 15 to 19 | 4.9  | 2.5 to 8.2  | 42    | 23.8 to 69.8   | 0.6 | 0.3 to 1.0 |
| Tanzania   | Female | 1 to 4   | 0.3  | 0.1 to 0.5  | 12.5  | 2.7 to 41.0    | 0.1 | 0.0 to 0.5 |
| Tanzania   | Female | 5 to 9   | 0.9  | 0.4 to 1.6  | 7.9   | 3.0 to 17.7    | 0.1 | 0.0 to 0.2 |
| Tanzania   | Female | 10 to 14 | 1.9  | 0.9 to 3.0  | 7.9   | 3.6 to 16.5    | 0.1 | 0.0 to 0.2 |
| Tanzania   | Female | 15 to 19 | 2.8  | 1.4 to 4.7  | 28.5  | 13.4 to 52.3   | 0.4 | 0.2 to 0.7 |
| Tanzania   | Both   | 1 to 4   | 0.5  | 0.3 to 0.7  | 13.6  | 4.8 to 31.2    | 0.2 | 0.1 to 0.4 |
| Tanzania   | Both   | 5 to 9   | 1.5  | 0.8 to 2.2  | 11.1  | 5.8 to 19.9    | 0.1 | 0.1 to 0.2 |
| Tanzania   | Both   | 10 to 14 | 2.7  | 1.7 to 3.8  | 11.3  | 6.8 to 17.7    | 0.1 | 0.1 to 0.2 |
| Tanzania   | Both   | 15 to 19 | 3.9  | 2.4 to 5.7  | 35.2  | 22.3 to 51.8   | 0.5 | 0.3 to 0.7 |
| Uganda     | Male   | 1 to 4   | 0.7  | 0.4 to 1.0  | 17.5  | 5.8 to 43.1    | 0.2 | 0.1 to 0.5 |
| Uganda     | Male   | 5 to 9   | 1.9  | 1.2 to 2.9  | 12.6  | 5.2 to 25.4    | 0.2 | 0.1 to 0.3 |
| Uganda     | Male   | 10 to 14 | 3.4  | 2.1 to 5.1  | 17.1  | 7.6 to 32.9    | 0.2 | 0.1 to 0.4 |

|          |        |          |     |            |      |              |     |            |
|----------|--------|----------|-----|------------|------|--------------|-----|------------|
| Uganda   | Male   | 15 to 19 | 4.5 | 2.5 to 7.4 | 49.4 | 26.7 to 84.7 | 0.7 | 0.4 to 1.2 |
| Uganda   | Female | 1 to 4   | 0.3 | 0.1 to 0.5 | 15   | 4.3 to 36.2  | 0.2 | 0.1 to 0.4 |
| Uganda   | Female | 5 to 9   | 0.9 | 0.5 to 1.5 | 10.9 | 4.0 to 24.3  | 0.1 | 0.0 to 0.3 |
| Uganda   | Female | 10 to 14 | 1.7 | 1.0 to 2.7 | 11.7 | 4.9 to 23.0  | 0.2 | 0.1 to 0.3 |
| Uganda   | Female | 15 to 19 | 2.6 | 1.3 to 4.2 | 37.3 | 14.9 to 69.8 | 0.5 | 0.2 to 1.0 |
| Uganda   | Both   | 1 to 4   | 0.5 | 0.3 to 0.7 | 16.3 | 7.1 to 31.9  | 0.2 | 0.1 to 0.4 |
| Uganda   | Both   | 5 to 9   | 1.4 | 1.0 to 2.0 | 11.8 | 5.7 to 21.6  | 0.1 | 0.1 to 0.3 |
| Uganda   | Both   | 10 to 14 | 2.6 | 1.8 to 3.6 | 14.4 | 8.1 to 25.4  | 0.2 | 0.1 to 0.3 |
| Uganda   | Both   | 15 to 19 | 3.6 | 2.3 to 5.3 | 43.4 | 25.5 to 66.4 | 0.6 | 0.4 to 0.9 |
| Zambia   | Male   | 1 to 4   | 0.7 | 0.4 to 1.1 | 15   | 4.6 to 35.0  | 0.2 | 0.1 to 0.4 |
| Zambia   | Male   | 5 to 9   | 2   | 1.2 to 3.0 | 9.9  | 4.2 to 20.0  | 0.1 | 0.0 to 0.2 |
| Zambia   | Male   | 10 to 14 | 3.4 | 2.1 to 5.2 | 11   | 5.4 to 21.4  | 0.1 | 0.1 to 0.3 |
| Zambia   | Male   | 15 to 19 | 4.7 | 2.5 to 7.9 | 42.9 | 23.1 to 75.1 | 0.6 | 0.3 to 1.1 |
| Zambia   | Female | 1 to 4   | 0.3 | 0.1 to 0.5 | 12.2 | 2.8 to 30.3  | 0.1 | 0.0 to 0.4 |
| Zambia   | Female | 5 to 9   | 0.8 | 0.4 to 1.4 | 5.4  | 2.1 to 11.5  | 0.1 | 0.0 to 0.1 |
| Zambia   | Female | 10 to 14 | 1.6 | 0.9 to 2.5 | 6.8  | 2.9 to 12.8  | 0.1 | 0.0 to 0.2 |
| Zambia   | Female | 15 to 19 | 2.4 | 1.3 to 4.0 | 33.3 | 16.2 to 59.6 | 0.5 | 0.2 to 0.9 |
| Zambia   | Both   | 1 to 4   | 0.5 | 0.3 to 0.7 | 13.6 | 5.0 to 26.5  | 0.2 | 0.1 to 0.3 |
| Zambia   | Both   | 5 to 9   | 1.4 | 0.9 to 1.9 | 7.6  | 4.0 to 13.9  | 0.1 | 0.0 to 0.2 |
| Zambia   | Both   | 10 to 14 | 2.5 | 1.7 to 3.5 | 8.9  | 5.0 to 15.1  | 0.1 | 0.1 to 0.2 |
| Zambia   | Both   | 15 to 19 | 3.5 | 2.3 to 5.2 | 38.1 | 23.2 to 57.7 | 0.5 | 0.3 to 0.8 |
| Botswana | Male   | 1 to 4   | 0.4 | 0.2 to 0.7 | 27.6 | 7.9 to 67.5  | 0.3 | 0.1 to 0.8 |
| Botswana | Male   | 5 to 9   | 1.4 | 0.8 to 2.3 | 25.6 | 9.7 to 53.3  | 0.3 | 0.1 to 0.7 |
| Botswana | Male   | 10 to 14 | 2.8 | 1.8 to 4.2 | 33.8 | 16.3 to 60.8 | 0.4 | 0.2 to 0.8 |
| Botswana | Male   | 15 to 19 | 4.4 | 2.6 to 6.7 | 51.4 | 26.7 to 88.4 | 0.7 | 0.4 to 1.3 |
| Botswana | Female | 1 to 4   | 0.3 | 0.1 to 0.5 | 24   | 8.0 to 59.8  | 0.3 | 0.1 to 0.7 |
| Botswana | Female | 5 to 9   | 0.9 | 0.5 to 1.7 | 22.6 | 9.5 to 48.2  | 0.3 | 0.1 to 0.6 |
| Botswana | Female | 10 to 14 | 2   | 1.1 to 3.3 | 10.5 | 2.1 to 34.2  | 0.1 | 0.0 to 0.5 |
| Botswana | Female | 15 to 19 | 3.3 | 1.8 to 5.3 | 24.9 | 10.0 to 56.1 | 0.4 | 0.1 to 0.8 |
| Botswana | Both   | 1 to 4   | 0.4 | 0.2 to 0.5 | 25.8 | 10.8 to 52.5 | 0.3 | 0.1 to 0.6 |
| Botswana | Both   | 5 to 9   | 1.2 | 0.7 to 1.7 | 24.1 | 12.3 to 43.2 | 0.3 | 0.2 to 0.5 |
| Botswana | Both   | 10 to 14 | 2.4 | 1.7 to 3.3 | 22.2 | 10.9 to 39.2 | 0.3 | 0.1 to 0.5 |
| Botswana | Both   | 15 to 19 | 3.9 | 2.7 to 5.4 | 38.2 | 21.9 to 59.5 | 0.5 | 0.3 to 0.8 |

|              |        |          |     |            |       |               |     |            |
|--------------|--------|----------|-----|------------|-------|---------------|-----|------------|
| Lesotho      | Male   | 1 to 4   | 0.4 | 0.2 to 0.7 | 112.3 | 35.7 to 245.0 | 1.3 | 0.4 to 2.9 |
| Lesotho      | Male   | 5 to 9   | 1.4 | 0.8 to 2.1 | 86.7  | 38.1 to 174.4 | 1.1 | 0.5 to 2.2 |
| Lesotho      | Male   | 10 to 14 | 2.8 | 1.7 to 4.1 | 63.6  | 32.0 to 119.5 | 0.9 | 0.4 to 1.6 |
| Lesotho      | Male   | 15 to 19 | 4.3 | 2.6 to 6.5 | 126.5 | 67.4 to 213.3 | 1.8 | 1.0 to 3.1 |
| Lesotho      | Female | 1 to 4   | 0.3 | 0.1 to 0.4 | 95.8  | 32.7 to 212.9 | 1.1 | 0.4 to 2.5 |
| Lesotho      | Female | 5 to 9   | 0.9 | 0.5 to 1.5 | 60.1  | 25.0 to 131.8 | 0.8 | 0.3 to 1.7 |
| Lesotho      | Female | 10 to 14 | 2   | 1.2 to 3.2 | 36.3  | 15.9 to 76.6  | 0.5 | 0.2 to 1.0 |
| Lesotho      | Female | 15 to 19 | 3.3 | 1.9 to 5.3 | 91    | 43.6 to 175.0 | 1.3 | 0.6 to 2.5 |
| Lesotho      | Both   | 1 to 4   | 0.3 | 0.2 to 0.5 | 104   | 44.4 to 199.1 | 1.2 | 0.5 to 2.4 |
| Lesotho      | Both   | 5 to 9   | 1.2 | 0.8 to 1.6 | 73.5  | 38.5 to 142.3 | 0.9 | 0.5 to 1.8 |
| Lesotho      | Both   | 10 to 14 | 2.4 | 1.7 to 3.2 | 50.1  | 28.3 to 89.3  | 0.7 | 0.4 to 1.2 |
| Lesotho      | Both   | 15 to 19 | 3.8 | 2.7 to 5.3 | 109   | 65.4 to 167.7 | 1.6 | 0.9 to 2.4 |
| Namibia      | Male   | 1 to 4   | 0.4 | 0.2 to 0.7 | 42.6  | 14.1 to 100.5 | 0.5 | 0.2 to 1.2 |
| Namibia      | Male   | 5 to 9   | 1.4 | 0.8 to 2.1 | 42    | 18.6 to 81.9  | 0.5 | 0.2 to 1.0 |
| Namibia      | Male   | 10 to 14 | 2.7 | 1.6 to 4.0 | 44.8  | 22.9 to 77.9  | 0.6 | 0.3 to 1.0 |
| Namibia      | Male   | 15 to 19 | 4.2 | 2.5 to 6.2 | 92.7  | 53.3 to 153.5 | 1.3 | 0.8 to 2.2 |
| Namibia      | Female | 1 to 4   | 0.3 | 0.1 to 0.4 | 35.6  | 11.4 to 82.6  | 0.4 | 0.1 to 1.0 |
| Namibia      | Female | 5 to 9   | 0.9 | 0.4 to 1.6 | 25.6  | 10.5 to 54.1  | 0.3 | 0.1 to 0.7 |
| Namibia      | Female | 10 to 14 | 2   | 1.0 to 3.1 | 30.2  | 13.0 to 62.6  | 0.4 | 0.2 to 0.8 |
| Namibia      | Female | 15 to 19 | 3.3 | 1.7 to 5.1 | 50.6  | 24.9 to 89.0  | 0.7 | 0.4 to 1.3 |
| Namibia      | Both   | 1 to 4   | 0.3 | 0.2 to 0.5 | 39.1  | 16.2 to 82.8  | 0.5 | 0.2 to 1.0 |
| Namibia      | Both   | 5 to 9   | 1.2 | 0.7 to 1.7 | 33.8  | 17.7 to 60.0  | 0.4 | 0.2 to 0.8 |
| Namibia      | Both   | 10 to 14 | 2.4 | 1.6 to 3.3 | 37.5  | 21.0 to 63.5  | 0.5 | 0.3 to 0.8 |
| Namibia      | Both   | 15 to 19 | 3.8 | 2.6 to 5.2 | 71.6  | 45.8 to 107.8 | 1   | 0.7 to 1.5 |
| South Africa | Male   | 1 to 4   | 0.4 | 0.2 to 0.7 | 22.7  | 8.3 to 53.3   | 0.3 | 0.1 to 0.6 |
| South Africa | Male   | 5 to 9   | 1.3 | 0.7 to 2.0 | 16.8  | 8.3 to 30.3   | 0.2 | 0.1 to 0.4 |
| South Africa | Male   | 10 to 14 | 2.6 | 1.5 to 3.9 | 20.8  | 11.8 to 35.5  | 0.3 | 0.2 to 0.5 |
| South Africa | Male   | 15 to 19 | 4.1 | 2.3 to 6.5 | 80    | 48.3 to 127.4 | 1.1 | 0.7 to 1.8 |
| South Africa | Female | 1 to 4   | 0.3 | 0.1 to 0.4 | 22.3  | 6.2 to 50.3   | 0.3 | 0.1 to 0.6 |
| South Africa | Female | 5 to 9   | 0.9 | 0.5 to 1.4 | 12.5  | 4.9 to 24.9   | 0.2 | 0.1 to 0.3 |
| South Africa | Female | 10 to 14 | 2   | 1.1 to 3.0 | 20.3  | 10.4 to 35.6  | 0.3 | 0.1 to 0.5 |
| South Africa | Female | 15 to 19 | 3.3 | 1.9 to 5.3 | 41.2  | 23.1 to 73.0  | 0.6 | 0.3 to 1.0 |
| South Africa | Both   | 1 to 4   | 0.3 | 0.2 to 0.5 | 22.5  | 9.6 to 44.6   | 0.3 | 0.1 to 0.5 |

|              |        |          |     |            |        |                 |      |             |
|--------------|--------|----------|-----|------------|--------|-----------------|------|-------------|
| South Africa | Both   | 5 to 9   | 1.1 | 0.7 to 1.5 | 14.6   | 8.2 to 24.5     | 0.2  | 0.1 to 0.3  |
| South Africa | Both   | 10 to 14 | 2.3 | 1.6 to 3.1 | 20.6   | 12.8 to 31.4    | 0.3  | 0.2 to 0.4  |
| South Africa | Both   | 15 to 19 | 3.7 | 2.5 to 5.3 | 60.7   | 41.3 to 90.9    | 0.9  | 0.6 to 1.3  |
| Swaziland    | Male   | 1 to 4   | 0.4 | 0.2 to 0.6 | 110.4  | 39.5 to 243.4   | 1.3  | 0.5 to 2.9  |
| Swaziland    | Male   | 5 to 9   | 1.3 | 0.7 to 2.0 | 64.3   | 27.8 to 131.7   | 0.8  | 0.3 to 1.7  |
| Swaziland    | Male   | 10 to 14 | 2.6 | 1.6 to 4.0 | 52.5   | 26.7 to 95.8    | 0.7  | 0.4 to 1.3  |
| Swaziland    | Male   | 15 to 19 | 4.2 | 2.4 to 6.5 | 102    | 55.1 to 179.4   | 1.5  | 0.8 to 2.6  |
| Swaziland    | Female | 1 to 4   | 0.3 | 0.1 to 0.4 | 124.9  | 46.0 to 266.8   | 1.5  | 0.5 to 3.2  |
| Swaziland    | Female | 5 to 9   | 0.9 | 0.5 to 1.4 | 57.8   | 25.0 to 122.6   | 0.7  | 0.3 to 1.5  |
| Swaziland    | Female | 10 to 14 | 2   | 1.2 to 2.9 | 40.5   | 19.9 to 75.3    | 0.5  | 0.3 to 1.0  |
| Swaziland    | Female | 15 to 19 | 3.3 | 2.0 to 5.1 | 91.7   | 48.7 to 152.8   | 1.3  | 0.7 to 2.2  |
| Swaziland    | Both   | 1 to 4   | 0.3 | 0.2 to 0.4 | 117.6  | 55.2 to 219.0   | 1.4  | 0.7 to 2.6  |
| Swaziland    | Both   | 5 to 9   | 1.1 | 0.7 to 1.5 | 61.1   | 32.0 to 114.8   | 0.8  | 0.4 to 1.4  |
| Swaziland    | Both   | 10 to 14 | 2.3 | 1.5 to 3.1 | 46.5   | 27.1 to 79.6    | 0.6  | 0.4 to 1.1  |
| Swaziland    | Both   | 15 to 19 | 3.7 | 2.6 to 5.1 | 96.9   | 61.5 to 148.2   | 1.4  | 0.9 to 2.1  |
| Zimbabwe     | Male   | 1 to 4   | 0.4 | 0.2 to 0.7 | 581.9  | 231.1 to 1223.6 | 6.9  | 2.7 to 14.5 |
| Zimbabwe     | Male   | 5 to 9   | 1.3 | 0.8 to 2.1 | 119.6  | 47.4 to 239.1   | 1.5  | 0.6 to 3.0  |
| Zimbabwe     | Male   | 10 to 14 | 2.6 | 1.6 to 3.8 | 91.7   | 42.7 to 168.2   | 1.2  | 0.6 to 2.3  |
| Zimbabwe     | Male   | 15 to 19 | 4.2 | 2.4 to 6.4 | 181.7  | 83.6 to 316.4   | 2.6  | 1.2 to 4.6  |
| Zimbabwe     | Female | 1 to 4   | 0.3 | 0.1 to 0.5 | 1119.5 | 182.0 to 2519.2 | 13.3 | 2.2 to 29.8 |
| Zimbabwe     | Female | 5 to 9   | 1   | 0.5 to 1.5 | 192    | 58.3 to 423.7   | 2.4  | 0.7 to 5.3  |
| Zimbabwe     | Female | 10 to 14 | 2   | 1.2 to 3.0 | 85.1   | 31.2 to 169.3   | 1.1  | 0.4 to 2.3  |
| Zimbabwe     | Female | 15 to 19 | 3.3 | 1.9 to 5.1 | 158.2  | 59.0 to 279.1   | 2.3  | 0.8 to 4.0  |
| Zimbabwe     | Both   | 1 to 4   | 0.3 | 0.2 to 0.5 | 849.8  | 251.5 to 1616.7 | 10.1 | 3.0 to 19.1 |
| Zimbabwe     | Both   | 5 to 9   | 1.1 | 0.8 to 1.6 | 155.7  | 62.3 to 292.3   | 2    | 0.8 to 3.7  |
| Zimbabwe     | Both   | 10 to 14 | 2.3 | 1.7 to 3.0 | 88.4   | 40.9 to 149.5   | 1.2  | 0.5 to 2.0  |
| Zimbabwe     | Both   | 15 to 19 | 3.7 | 2.5 to 5.1 | 169.9  | 81.9 to 269.9   | 2.4  | 1.2 to 3.9  |
| Benin        | Male   | 1 to 4   | 0.5 | 0.3 to 0.8 | 66.7   | 15.8 to 162.0   | 0.8  | 0.2 to 1.9  |
| Benin        | Male   | 5 to 9   | 1.6 | 0.9 to 2.5 | 36     | 14.8 to 69.6    | 0.5  | 0.2 to 0.9  |
| Benin        | Male   | 10 to 14 | 3   | 1.9 to 4.5 | 49.9   | 25.6 to 88.8    | 0.7  | 0.3 to 1.2  |
| Benin        | Male   | 15 to 19 | 4.6 | 2.8 to 6.9 | 97.8   | 51.2 to 167.1   | 1.4  | 0.7 to 2.4  |
| Benin        | Female | 1 to 4   | 0.3 | 0.1 to 0.5 | 44.9   | 12.1 to 119.1   | 0.5  | 0.1 to 1.4  |
| Benin        | Female | 5 to 9   | 0.9 | 0.4 to 1.4 | 23.2   | 8.1 to 52.8     | 0.3  | 0.1 to 0.7  |

|              |        |          |     |            |       |                |     |            |
|--------------|--------|----------|-----|------------|-------|----------------|-----|------------|
| Benin        | Female | 10 to 14 | 1.7 | 1.0 to 2.7 | 31.7  | 14.9 to 61.6   | 0.4 | 0.2 to 0.8 |
| Benin        | Female | 15 to 19 | 2.8 | 1.6 to 4.3 | 53.2  | 25.9 to 97.5   | 0.8 | 0.4 to 1.4 |
| Benin        | Both   | 1 to 4   | 0.4 | 0.3 to 0.6 | 56    | 19.7 to 113.8  | 0.7 | 0.2 to 1.3 |
| Benin        | Both   | 5 to 9   | 1.2 | 0.8 to 1.8 | 29.7  | 14.8 to 51.0   | 0.4 | 0.2 to 0.6 |
| Benin        | Both   | 10 to 14 | 2.4 | 1.7 to 3.3 | 40.8  | 25.3 to 64.9   | 0.5 | 0.3 to 0.9 |
| Benin        | Both   | 15 to 19 | 3.7 | 2.5 to 5.1 | 75.5  | 45.3 to 115.0  | 1.1 | 0.6 to 1.7 |
| Burkina Faso | Male   | 1 to 4   | 0.5 | 0.3 to 0.8 | 34.5  | 9.8 to 78.6    | 0.4 | 0.1 to 0.9 |
| Burkina Faso | Male   | 5 to 9   | 1.4 | 0.8 to 2.2 | 24.1  | 9.4 to 47.4    | 0.3 | 0.1 to 0.6 |
| Burkina Faso | Male   | 10 to 14 | 2.8 | 1.6 to 4.2 | 23.3  | 11.0 to 45.1   | 0.3 | 0.1 to 0.6 |
| Burkina Faso | Male   | 15 to 19 | 4.3 | 2.4 to 6.7 | 45.9  | 23.2 to 78.8   | 0.7 | 0.3 to 1.1 |
| Burkina Faso | Female | 1 to 4   | 0.3 | 0.2 to 0.4 | 25    | 8.0 to 61.8    | 0.3 | 0.1 to 0.7 |
| Burkina Faso | Female | 5 to 9   | 0.8 | 0.4 to 1.3 | 13.9  | 5.3 to 31.7    | 0.2 | 0.1 to 0.4 |
| Burkina Faso | Female | 10 to 14 | 1.7 | 1.0 to 2.6 | 15.1  | 6.5 to 30.2    | 0.2 | 0.1 to 0.4 |
| Burkina Faso | Female | 15 to 19 | 2.9 | 1.5 to 4.3 | 31.6  | 14.5 to 59.2   | 0.4 | 0.2 to 0.8 |
| Burkina Faso | Both   | 1 to 4   | 0.4 | 0.2 to 0.5 | 29.8  | 12.5 to 58.1   | 0.4 | 0.1 to 0.7 |
| Burkina Faso | Both   | 5 to 9   | 1.1 | 0.7 to 1.6 | 19.1  | 9.6 to 34.0    | 0.2 | 0.1 to 0.4 |
| Burkina Faso | Both   | 10 to 14 | 2.3 | 1.5 to 3.1 | 19.3  | 10.4 to 32.0   | 0.3 | 0.1 to 0.4 |
| Burkina Faso | Both   | 15 to 19 | 3.6 | 2.3 to 5.0 | 38.9  | 23.1 to 59.6   | 0.6 | 0.3 to 0.9 |
| Cameroon     | Male   | 1 to 4   | 0.5 | 0.3 to 0.8 | 281.2 | 103.4 to 605.0 | 3.3 | 1.2 to 7.2 |
| Cameroon     | Male   | 5 to 9   | 1.5 | 0.8 to 2.2 | 94.4  | 45.5 to 177.8  | 1.2 | 0.6 to 2.2 |
| Cameroon     | Male   | 10 to 14 | 2.8 | 1.6 to 4.1 | 85.1  | 46.0 to 144.1  | 1.1 | 0.6 to 1.9 |
| Cameroon     | Male   | 15 to 19 | 4.3 | 2.4 to 6.5 | 118.4 | 59.4 to 200.4  | 1.7 | 0.8 to 2.9 |
| Cameroon     | Female | 1 to 4   | 0.3 | 0.1 to 0.5 | 182.3 | 44.2 to 633.0  | 2.2 | 0.5 to 7.5 |
| Cameroon     | Female | 5 to 9   | 0.9 | 0.5 to 1.4 | 56.1  | 19.2 to 138.1  | 0.7 | 0.2 to 1.7 |
| Cameroon     | Female | 10 to 14 | 1.8 | 1.1 to 2.8 | 54.4  | 22.6 to 119.1  | 0.7 | 0.3 to 1.6 |
| Cameroon     | Female | 15 to 19 | 2.9 | 1.6 to 4.5 | 91.8  | 43.1 to 179.1  | 1.3 | 0.6 to 2.6 |
| Cameroon     | Both   | 1 to 4   | 0.4 | 0.3 to 0.6 | 232.2 | 101.5 to 501.3 | 2.7 | 1.2 to 5.9 |
| Cameroon     | Both   | 5 to 9   | 1.2 | 0.8 to 1.6 | 75.4  | 41.6 to 132.3  | 0.9 | 0.5 to 1.7 |
| Cameroon     | Both   | 10 to 14 | 2.3 | 1.6 to 3.1 | 69.8  | 41.7 to 115.9  | 0.9 | 0.6 to 1.6 |
| Cameroon     | Both   | 15 to 19 | 3.6 | 2.4 to 4.9 | 105.2 | 62.9 to 170.4  | 1.5 | 0.9 to 2.4 |
| Cape Verde   | Male   | 1 to 4   | 0.5 | 0.3 to 0.8 | 146.6 | 51.0 to 305.3  | 1.7 | 0.6 to 3.6 |
| Cape Verde   | Male   | 5 to 9   | 1.5 | 0.9 to 2.4 | 91    | 42.3 to 161.9  | 1.1 | 0.5 to 2.0 |
| Cape Verde   | Male   | 10 to 14 | 2.9 | 1.7 to 4.4 | 123.4 | 67.9 to 195.4  | 1.7 | 0.9 to 2.6 |

|               |        |          |     |            |       |                |     |            |
|---------------|--------|----------|-----|------------|-------|----------------|-----|------------|
| Cape Verde    | Male   | 15 to 19 | 4.4 | 2.5 to 6.7 | 229.7 | 117.0 to 405.6 | 3.3 | 1.7 to 5.9 |
| Cape Verde    | Female | 1 to 4   | 0.3 | 0.1 to 0.4 | 25.4  | 1.3 to 136.2   | 0.3 | 0.0 to 1.6 |
| Cape Verde    | Female | 5 to 9   | 0.8 | 0.4 to 1.3 | 14.1  | 1.1 to 78.7    | 0.2 | 0.0 to 1.0 |
| Cape Verde    | Female | 10 to 14 | 1.8 | 1.0 to 2.8 | 22.2  | 2.1 to 113.8   | 0.3 | 0.0 to 1.5 |
| Cape Verde    | Female | 15 to 19 | 2.9 | 1.7 to 4.4 | 9.6   | 2.2 to 39.7    | 0.1 | 0.0 to 0.6 |
| Cape Verde    | Both   | 1 to 4   | 0.4 | 0.3 to 0.6 | 86.8  | 32.7 to 180.8  | 1   | 0.4 to 2.1 |
| Cape Verde    | Both   | 5 to 9   | 1.2 | 0.8 to 1.7 | 52.6  | 24.4 to 95.3   | 0.7 | 0.3 to 1.2 |
| Cape Verde    | Both   | 10 to 14 | 2.3 | 1.6 to 3.2 | 73    | 38.7 to 126.8  | 1   | 0.5 to 1.7 |
| Cape Verde    | Both   | 15 to 19 | 3.6 | 2.6 to 5.0 | 120.9 | 61.4 to 213.5  | 1.7 | 0.9 to 3.1 |
| Chad          | Male   | 1 to 4   | 0.5 | 0.3 to 0.8 | 173.4 | 56.6 to 393.5  | 2.1 | 0.7 to 4.7 |
| Chad          | Male   | 5 to 9   | 1.6 | 0.9 to 2.5 | 64.7  | 28.4 to 128.9  | 0.8 | 0.4 to 1.6 |
| Chad          | Male   | 10 to 14 | 3   | 1.7 to 4.6 | 54.2  | 25.4 to 97.0   | 0.7 | 0.3 to 1.3 |
| Chad          | Male   | 15 to 19 | 4.4 | 2.4 to 7.0 | 55.3  | 26.5 to 105.6  | 0.8 | 0.4 to 1.5 |
| Chad          | Female | 1 to 4   | 0.3 | 0.2 to 0.4 | 194.2 | 53.8 to 483.7  | 2.3 | 0.6 to 5.7 |
| Chad          | Female | 5 to 9   | 0.8 | 0.5 to 1.3 | 59.3  | 25.2 to 127.7  | 0.7 | 0.3 to 1.6 |
| Chad          | Female | 10 to 14 | 1.8 | 1.1 to 2.7 | 51.6  | 22.1 to 106.6  | 0.7 | 0.3 to 1.4 |
| Chad          | Female | 15 to 19 | 3   | 1.7 to 4.8 | 62    | 24.3 to 123.0  | 0.9 | 0.3 to 1.8 |
| Chad          | Both   | 1 to 4   | 0.4 | 0.3 to 0.6 | 183.7 | 78.1 to 355.4  | 2.2 | 0.9 to 4.2 |
| Chad          | Both   | 5 to 9   | 1.2 | 0.8 to 1.7 | 62    | 32.2 to 113.1  | 0.8 | 0.4 to 1.4 |
| Chad          | Both   | 10 to 14 | 2.4 | 1.7 to 3.2 | 52.9  | 29.9 to 85.3   | 0.7 | 0.4 to 1.1 |
| Chad          | Both   | 15 to 19 | 3.7 | 2.5 to 5.1 | 58.6  | 33.9 to 95.5   | 0.8 | 0.5 to 1.4 |
| Cote d'Ivoire | Male   | 1 to 4   | 0.5 | 0.3 to 0.8 | 175.7 | 50.7 to 403.7  | 2.1 | 0.6 to 4.8 |
| Cote d'Ivoire | Male   | 5 to 9   | 1.5 | 0.9 to 2.5 | 73.9  | 33.2 to 142.9  | 0.9 | 0.4 to 1.8 |
| Cote d'Ivoire | Male   | 10 to 14 | 2.9 | 1.8 to 4.3 | 68.7  | 35.2 to 115.3  | 0.9 | 0.5 to 1.5 |
| Cote d'Ivoire | Male   | 15 to 19 | 4.4 | 2.5 to 6.8 | 106.4 | 55.0 to 183.3  | 1.5 | 0.8 to 2.6 |
| Cote d'Ivoire | Female | 1 to 4   | 0.3 | 0.1 to 0.4 | 103.1 | 30.0 to 254.7  | 1.2 | 0.4 to 3.0 |
| Cote d'Ivoire | Female | 5 to 9   | 0.8 | 0.4 to 1.3 | 55.9  | 23.5 to 111.2  | 0.7 | 0.3 to 1.4 |
| Cote d'Ivoire | Female | 10 to 14 | 1.7 | 1.0 to 2.6 | 51.6  | 25.0 to 100.0  | 0.7 | 0.3 to 1.3 |
| Cote d'Ivoire | Female | 15 to 19 | 2.8 | 1.6 to 4.5 | 89.5  | 45.1 to 152.7  | 1.3 | 0.6 to 2.2 |
| Cote d'Ivoire | Both   | 1 to 4   | 0.4 | 0.3 to 0.6 | 139.7 | 56.7 to 263.1  | 1.7 | 0.7 to 3.1 |
| Cote d'Ivoire | Both   | 5 to 9   | 1.2 | 0.8 to 1.7 | 65    | 36.4 to 107.3  | 0.8 | 0.5 to 1.4 |
| Cote d'Ivoire | Both   | 10 to 14 | 2.3 | 1.6 to 3.1 | 60.2  | 37.1 to 90.7   | 0.8 | 0.5 to 1.2 |
| Cote d'Ivoire | Both   | 15 to 19 | 3.6 | 2.5 to 5.1 | 98    | 60.4 to 147.9  | 1.4 | 0.9 to 2.1 |

|            |        |          |     |            |       |               |     |            |
|------------|--------|----------|-----|------------|-------|---------------|-----|------------|
| The Gambia | Male   | 1 to 4   | 0.5 | 0.2 to 0.7 | 80.4  | 24.9 to 190.2 | 1   | 0.3 to 2.3 |
| The Gambia | Male   | 5 to 9   | 1.4 | 0.8 to 2.2 | 39.8  | 16.6 to 77.0  | 0.5 | 0.2 to 1.0 |
| The Gambia | Male   | 10 to 14 | 2.7 | 1.8 to 4.0 | 53.1  | 24.0 to 96.0  | 0.7 | 0.3 to 1.3 |
| The Gambia | Male   | 15 to 19 | 4.2 | 2.6 to 6.2 | 82.5  | 35.5 to 156.5 | 1.2 | 0.5 to 2.3 |
| The Gambia | Female | 1 to 4   | 0.3 | 0.2 to 0.5 | 59.1  | 20.4 to 142.4 | 0.7 | 0.2 to 1.7 |
| The Gambia | Female | 5 to 9   | 0.9 | 0.5 to 1.4 | 28.9  | 11.2 to 62.4  | 0.4 | 0.1 to 0.8 |
| The Gambia | Female | 10 to 14 | 1.7 | 1.1 to 2.8 | 44.2  | 18.6 to 93.1  | 0.6 | 0.2 to 1.2 |
| The Gambia | Female | 15 to 19 | 2.8 | 1.6 to 4.5 | 69.5  | 28.9 to 136.0 | 1   | 0.4 to 2.0 |
| The Gambia | Both   | 1 to 4   | 0.4 | 0.2 to 0.5 | 69.9  | 31.2 to 141.8 | 0.8 | 0.4 to 1.7 |
| The Gambia | Both   | 5 to 9   | 1.2 | 0.8 to 1.6 | 34.4  | 17.8 to 60.2  | 0.4 | 0.2 to 0.8 |
| The Gambia | Both   | 10 to 14 | 2.2 | 1.6 to 3.0 | 48.7  | 27.1 to 81.3  | 0.6 | 0.4 to 1.1 |
| The Gambia | Both   | 15 to 19 | 3.5 | 2.4 to 4.8 | 76    | 38.5 to 126.3 | 1.1 | 0.5 to 1.8 |
| Ghana      | Male   | 1 to 4   | 0.5 | 0.3 to 0.8 | 141.6 | 53.8 to 296.5 | 1.7 | 0.6 to 3.5 |
| Ghana      | Male   | 5 to 9   | 1.5 | 0.8 to 2.3 | 98.6  | 42.8 to 190.4 | 1.2 | 0.5 to 2.4 |
| Ghana      | Male   | 10 to 14 | 2.8 | 1.7 to 4.4 | 84.1  | 41.6 to 136.1 | 1.1 | 0.6 to 1.8 |
| Ghana      | Male   | 15 to 19 | 4.3 | 2.5 to 7.2 | 69.4  | 35.0 to 118.9 | 1   | 0.5 to 1.7 |
| Ghana      | Female | 1 to 4   | 0.3 | 0.1 to 0.5 | 108.9 | 42.6 to 218.1 | 1.3 | 0.5 to 2.6 |
| Ghana      | Female | 5 to 9   | 0.8 | 0.4 to 1.3 | 49.4  | 20.5 to 97.1  | 0.6 | 0.3 to 1.2 |
| Ghana      | Female | 10 to 14 | 1.7 | 1.1 to 2.6 | 48.2  | 21.6 to 86.6  | 0.6 | 0.3 to 1.2 |
| Ghana      | Female | 15 to 19 | 2.9 | 1.7 to 4.4 | 80.1  | 39.9 to 137.1 | 1.2 | 0.6 to 2.0 |
| Ghana      | Both   | 1 to 4   | 0.4 | 0.2 to 0.5 | 125.6 | 60.4 to 223.8 | 1.5 | 0.7 to 2.6 |
| Ghana      | Both   | 5 to 9   | 1.2 | 0.7 to 1.6 | 74.5  | 41.4 to 125.3 | 0.9 | 0.5 to 1.6 |
| Ghana      | Both   | 10 to 14 | 2.3 | 1.6 to 3.2 | 66.5  | 38.5 to 98.6  | 0.9 | 0.5 to 1.3 |
| Ghana      | Both   | 15 to 19 | 3.6 | 2.5 to 5.2 | 74.7  | 47.2 to 110.4 | 1.1 | 0.7 to 1.6 |
| Guinea     | Male   | 1 to 4   | 0.5 | 0.2 to 0.8 | 203.1 | 57.7 to 464.3 | 2.4 | 0.7 to 5.5 |
| Guinea     | Male   | 5 to 9   | 1.5 | 0.7 to 2.4 | 97.8  | 42.5 to 184.9 | 1.2 | 0.5 to 2.3 |
| Guinea     | Male   | 10 to 14 | 2.9 | 1.7 to 4.3 | 90.6  | 44.5 to 157.9 | 1.2 | 0.6 to 2.1 |
| Guinea     | Male   | 15 to 19 | 4.4 | 2.6 to 6.7 | 118.8 | 57.9 to 197.8 | 1.7 | 0.8 to 2.8 |
| Guinea     | Female | 1 to 4   | 0.3 | 0.1 to 0.5 | 136.2 | 32.9 to 373.4 | 1.6 | 0.4 to 4.4 |
| Guinea     | Female | 5 to 9   | 0.9 | 0.5 to 1.4 | 64.8  | 21.7 to 135.4 | 0.8 | 0.3 to 1.7 |
| Guinea     | Female | 10 to 14 | 1.8 | 1.1 to 2.7 | 75.2  | 31.3 to 156.7 | 1   | 0.4 to 2.1 |
| Guinea     | Female | 15 to 19 | 3   | 1.7 to 4.7 | 99.4  | 46.4 to 175.8 | 1.4 | 0.7 to 2.5 |
| Guinea     | Both   | 1 to 4   | 0.4 | 0.2 to 0.6 | 169.9 | 62.2 to 335.5 | 2   | 0.7 to 4.0 |

|               |        |          |     |            |       |               |     |            |
|---------------|--------|----------|-----|------------|-------|---------------|-----|------------|
| Guinea        | Both   | 5 to 9   | 1.2 | 0.7 to 1.8 | 81.5  | 42.0 to 134.2 | 1   | 0.5 to 1.7 |
| Guinea        | Both   | 10 to 14 | 2.3 | 1.7 to 3.2 | 83    | 48.2 to 132.0 | 1.1 | 0.6 to 1.8 |
| Guinea        | Both   | 15 to 19 | 3.7 | 2.6 to 5.0 | 109.2 | 65.4 to 161.5 | 1.6 | 0.9 to 2.3 |
| Guinea-Bissau | Male   | 1 to 4   | 0.5 | 0.3 to 0.8 | 302.9 | 57.9 to 685.9 | 3.6 | 0.7 to 8.1 |
| Guinea-Bissau | Male   | 5 to 9   | 1.5 | 0.7 to 2.4 | 162   | 60.9 to 318.6 | 2   | 0.8 to 4.0 |
| Guinea-Bissau | Male   | 10 to 14 | 2.7 | 1.5 to 4.2 | 132.5 | 60.8 to 239.7 | 1.8 | 0.8 to 3.2 |
| Guinea-Bissau | Male   | 15 to 19 | 4.1 | 2.4 to 6.4 | 147.5 | 68.5 to 267.2 | 2.1 | 1.0 to 3.8 |
| Guinea-Bissau | Female | 1 to 4   | 0.3 | 0.2 to 0.4 | 210.2 | 55.3 to 562.4 | 2.5 | 0.7 to 6.7 |
| Guinea-Bissau | Female | 5 to 9   | 0.8 | 0.5 to 1.3 | 108   | 40.3 to 258.8 | 1.4 | 0.5 to 3.3 |
| Guinea-Bissau | Female | 10 to 14 | 1.8 | 1.1 to 2.6 | 117.9 | 50.2 to 253.4 | 1.6 | 0.7 to 3.4 |
| Guinea-Bissau | Female | 15 to 19 | 2.9 | 1.6 to 4.5 | 140.4 | 60.3 to 267.9 | 2   | 0.9 to 3.9 |
| Guinea-Bissau | Both   | 1 to 4   | 0.4 | 0.3 to 0.5 | 256.9 | 98.0 to 527.4 | 3   | 1.2 to 6.2 |
| Guinea-Bissau | Both   | 5 to 9   | 1.2 | 0.7 to 1.7 | 135   | 68.1 to 243.5 | 1.7 | 0.9 to 3.1 |
| Guinea-Bissau | Both   | 10 to 14 | 2.2 | 1.6 to 3.1 | 125.2 | 70.7 to 207.9 | 1.7 | 0.9 to 2.8 |
| Guinea-Bissau | Both   | 15 to 19 | 3.5 | 2.4 to 4.8 | 144   | 80.3 to 233.6 | 2.1 | 1.2 to 3.4 |
| Liberia       | Male   | 1 to 4   | 0.5 | 0.3 to 0.9 | 106.5 | 24.8 to 266.3 | 1.3 | 0.3 to 3.2 |
| Liberia       | Male   | 5 to 9   | 1.6 | 1.0 to 2.4 | 76.6  | 30.4 to 144.8 | 1   | 0.4 to 1.8 |
| Liberia       | Male   | 10 to 14 | 3   | 1.9 to 4.4 | 78.4  | 40.2 to 131.3 | 1   | 0.5 to 1.8 |
| Liberia       | Male   | 15 to 19 | 4.4 | 2.6 to 6.7 | 114.7 | 61.1 to 192.6 | 1.6 | 0.9 to 2.8 |
| Liberia       | Female | 1 to 4   | 0.3 | 0.1 to 0.4 | 61.9  | 12.5 to 183.7 | 0.7 | 0.1 to 2.2 |
| Liberia       | Female | 5 to 9   | 0.8 | 0.5 to 1.3 | 41    | 14.5 to 98.1  | 0.5 | 0.2 to 1.2 |
| Liberia       | Female | 10 to 14 | 1.8 | 1.1 to 2.6 | 53.2  | 24.0 to 118.2 | 0.7 | 0.3 to 1.6 |
| Liberia       | Female | 15 to 19 | 2.9 | 1.7 to 4.3 | 73.2  | 35.7 to 148.8 | 1.1 | 0.5 to 2.1 |
| Liberia       | Both   | 1 to 4   | 0.4 | 0.2 to 0.6 | 84.7  | 24.9 to 186.6 | 1   | 0.3 to 2.2 |
| Liberia       | Both   | 5 to 9   | 1.2 | 0.8 to 1.7 | 59.2  | 28.1 to 103.0 | 0.7 | 0.4 to 1.3 |
| Liberia       | Both   | 10 to 14 | 2.4 | 1.7 to 3.1 | 66    | 41.9 to 100.4 | 0.9 | 0.6 to 1.3 |
| Liberia       | Both   | 15 to 19 | 3.6 | 2.4 to 4.9 | 94.3  | 59.7 to 145.8 | 1.4 | 0.9 to 2.1 |
| Mali          | Male   | 1 to 4   | 0.5 | 0.3 to 0.9 | 213.9 | 60.4 to 471.5 | 2.5 | 0.7 to 5.6 |
| Mali          | Male   | 5 to 9   | 1.5 | 0.9 to 2.4 | 123.3 | 53.7 to 241.8 | 1.6 | 0.7 to 3.0 |
| Mali          | Male   | 10 to 14 | 2.8 | 1.8 to 4.3 | 104.2 | 50.0 to 187.3 | 1.4 | 0.7 to 2.5 |
| Mali          | Male   | 15 to 19 | 4.2 | 2.5 to 6.7 | 115.5 | 59.3 to 197.9 | 1.7 | 0.8 to 2.8 |
| Mali          | Female | 1 to 4   | 0.3 | 0.1 to 0.4 | 154.7 | 45.7 to 370.0 | 1.8 | 0.5 to 4.4 |
| Mali          | Female | 5 to 9   | 0.8 | 0.4 to 1.3 | 64.2  | 24.4 to 188.7 | 0.8 | 0.3 to 2.4 |

|            |        |          |     |            |       |                |     |            |
|------------|--------|----------|-----|------------|-------|----------------|-----|------------|
| Mali       | Female | 10 to 14 | 1.7 | 1.0 to 2.6 | 120.9 | 56.7 to 236.5  | 1.6 | 0.8 to 3.2 |
| Mali       | Female | 15 to 19 | 2.8 | 1.6 to 4.3 | 208.6 | 102.7 to 385.6 | 3   | 1.5 to 5.6 |
| Mali       | Both   | 1 to 4   | 0.4 | 0.2 to 0.6 | 184.9 | 78.7 to 342.3  | 2.2 | 0.9 to 4.1 |
| Mali       | Both   | 5 to 9   | 1.2 | 0.8 to 1.7 | 94.3  | 49.0 to 168.1  | 1.2 | 0.6 to 2.1 |
| Mali       | Both   | 10 to 14 | 2.3 | 1.6 to 3.1 | 112.4 | 65.7 to 186.4  | 1.5 | 0.9 to 2.5 |
| Mali       | Both   | 15 to 19 | 3.5 | 2.4 to 4.9 | 160.9 | 94.8 to 251.9  | 2.3 | 1.4 to 3.6 |
| Mauritania | Male   | 1 to 4   | 0.5 | 0.2 to 0.7 | 100.2 | 29.2 to 232.5  | 1.2 | 0.3 to 2.8 |
| Mauritania | Male   | 5 to 9   | 1.4 | 0.8 to 2.3 | 56.3  | 24.8 to 107.1  | 0.7 | 0.3 to 1.3 |
| Mauritania | Male   | 10 to 14 | 2.7 | 1.6 to 4.1 | 62.9  | 34.0 to 107.3  | 0.8 | 0.5 to 1.4 |
| Mauritania | Male   | 15 to 19 | 4.1 | 2.3 to 6.4 | 86.7  | 41.7 to 149.2  | 1.2 | 0.6 to 2.1 |
| Mauritania | Female | 1 to 4   | 0.3 | 0.1 to 0.5 | 64.3  | 17.6 to 161.5  | 0.8 | 0.2 to 1.9 |
| Mauritania | Female | 5 to 9   | 0.9 | 0.4 to 1.4 | 41.4  | 16.9 to 86.0   | 0.5 | 0.2 to 1.1 |
| Mauritania | Female | 10 to 14 | 1.8 | 1.0 to 2.6 | 55.9  | 25.1 to 112.3  | 0.7 | 0.3 to 1.5 |
| Mauritania | Female | 15 to 19 | 2.9 | 1.6 to 4.5 | 68.4  | 33.4 to 122.0  | 1   | 0.5 to 1.8 |
| Mauritania | Both   | 1 to 4   | 0.4 | 0.2 to 0.5 | 82.6  | 34.8 to 160.5  | 1   | 0.4 to 1.9 |
| Mauritania | Both   | 5 to 9   | 1.1 | 0.8 to 1.6 | 48.9  | 27.0 to 79.4   | 0.6 | 0.3 to 1.0 |
| Mauritania | Both   | 10 to 14 | 2.2 | 1.6 to 3.0 | 59.5  | 35.4 to 91.5   | 0.8 | 0.5 to 1.2 |
| Mauritania | Both   | 15 to 19 | 3.5 | 2.4 to 4.7 | 77.7  | 45.4 to 120.3  | 1.1 | 0.6 to 1.7 |
| Niger      | Male   | 1 to 4   | 0.5 | 0.3 to 1.0 | 135.4 | 39.5 to 333.4  | 1.6 | 0.5 to 3.9 |
| Niger      | Male   | 5 to 9   | 1.5 | 0.8 to 2.5 | 49.3  | 21.1 to 95.9   | 0.6 | 0.3 to 1.2 |
| Niger      | Male   | 10 to 14 | 2.8 | 1.6 to 4.3 | 45.8  | 20.8 to 88.4   | 0.6 | 0.3 to 1.2 |
| Niger      | Male   | 15 to 19 | 4.3 | 2.5 to 6.7 | 51.3  | 25.1 to 91.8   | 0.7 | 0.4 to 1.3 |
| Niger      | Female | 1 to 4   | 0.3 | 0.1 to 0.4 | 143.2 | 38.0 to 379.5  | 1.7 | 0.4 to 4.5 |
| Niger      | Female | 5 to 9   | 0.8 | 0.4 to 1.4 | 56.8  | 16.8 to 127.8  | 0.7 | 0.2 to 1.6 |
| Niger      | Female | 10 to 14 | 1.7 | 1.0 to 2.6 | 55.8  | 17.9 to 120.7  | 0.7 | 0.2 to 1.6 |
| Niger      | Female | 15 to 19 | 2.8 | 1.6 to 4.2 | 60.9  | 15.2 to 126.5  | 0.9 | 0.2 to 1.8 |
| Niger      | Both   | 1 to 4   | 0.4 | 0.3 to 0.6 | 139.2 | 54.2 to 293.3  | 1.6 | 0.6 to 3.5 |
| Niger      | Both   | 5 to 9   | 1.2 | 0.7 to 1.8 | 52.9  | 23.5 to 96.1   | 0.7 | 0.3 to 1.2 |
| Niger      | Both   | 10 to 14 | 2.3 | 1.5 to 3.2 | 50.7  | 24.2 to 89.8   | 0.7 | 0.3 to 1.2 |
| Niger      | Both   | 15 to 19 | 3.6 | 2.4 to 5.0 | 56.1  | 28.1 to 94.6   | 0.8 | 0.4 to 1.4 |
| Nigeria    | Male   | 1 to 4   | 0.5 | 0.3 to 0.8 | 175.8 | 40.5 to 419.6  | 2.1 | 0.5 to 5.0 |
| Nigeria    | Male   | 5 to 9   | 1.5 | 0.8 to 2.5 | 63.6  | 20.4 to 136.8  | 0.8 | 0.3 to 1.7 |
| Nigeria    | Male   | 10 to 14 | 3   | 1.8 to 4.6 | 46.6  | 17.9 to 92.4   | 0.6 | 0.2 to 1.2 |

|                       |        |          |     |            |       |                |     |            |
|-----------------------|--------|----------|-----|------------|-------|----------------|-----|------------|
| Nigeria               | Male   | 15 to 19 | 4.6 | 2.7 to 7.4 | 41.3  | 18.7 to 74.6   | 0.6 | 0.3 to 1.1 |
| Nigeria               | Female | 1 to 4   | 0.3 | 0.1 to 0.4 | 165.2 | 38.0 to 637.3  | 2   | 0.4 to 7.5 |
| Nigeria               | Female | 5 to 9   | 0.8 | 0.4 to 1.4 | 36.5  | 12.7 to 99.4   | 0.5 | 0.2 to 1.3 |
| Nigeria               | Female | 10 to 14 | 1.8 | 0.9 to 2.8 | 35    | 13.5 to 85.5   | 0.5 | 0.2 to 1.1 |
| Nigeria               | Female | 15 to 19 | 2.9 | 1.6 to 4.9 | 50.3  | 23.8 to 99.5   | 0.7 | 0.3 to 1.4 |
| Nigeria               | Both   | 1 to 4   | 0.4 | 0.2 to 0.6 | 170.6 | 63.2 to 428.2  | 2   | 0.7 to 5.1 |
| Nigeria               | Both   | 5 to 9   | 1.2 | 0.7 to 1.7 | 50.4  | 22.0 to 101.2  | 0.6 | 0.3 to 1.3 |
| Nigeria               | Both   | 10 to 14 | 2.4 | 1.6 to 3.4 | 41    | 20.6 to 70.5   | 0.5 | 0.3 to 0.9 |
| Nigeria               | Both   | 15 to 19 | 3.8 | 2.6 to 5.4 | 45.7  | 24.8 to 72.9   | 0.7 | 0.4 to 1.0 |
| Sao Tome and Principe | Male   | 1 to 4   | 0.5 | 0.3 to 0.9 | 322.7 | 71.4 to 795.1  | 3.8 | 0.8 to 9.4 |
| Sao Tome and Principe | Male   | 5 to 9   | 1.5 | 0.8 to 2.5 | 133.1 | 48.9 to 250.5  | 1.7 | 0.6 to 3.2 |
| Sao Tome and Principe | Male   | 10 to 14 | 2.8 | 1.7 to 4.3 | 164.1 | 70.6 to 283.7  | 2.2 | 0.9 to 3.8 |
| Sao Tome and Principe | Male   | 15 to 19 | 4.2 | 2.6 to 6.6 | 359.4 | 162.9 to 602.5 | 5.2 | 2.3 to 8.7 |
| Sao Tome and Principe | Female | 1 to 4   | 0.3 | 0.1 to 0.4 | 259.6 | 68.3 to 636.2  | 3.1 | 0.8 to 7.5 |
| Sao Tome and Principe | Female | 5 to 9   | 0.9 | 0.5 to 1.3 | 89    | 29.8 to 185.0  | 1.1 | 0.4 to 2.3 |
| Sao Tome and Principe | Female | 10 to 14 | 1.8 | 1.0 to 2.6 | 112.5 | 37.0 to 213.8  | 1.5 | 0.5 to 2.9 |
| Sao Tome and Principe | Female | 15 to 19 | 2.8 | 1.5 to 4.5 | 198.5 | 84.8 to 349.9  | 2.9 | 1.2 to 5.0 |
| Sao Tome and Principe | Both   | 1 to 4   | 0.4 | 0.2 to 0.6 | 291.5 | 93.8 to 616.8  | 3.5 | 1.1 to 7.3 |
| Sao Tome and Principe | Both   | 5 to 9   | 1.2 | 0.8 to 1.7 | 111.2 | 47.6 to 188.3  | 1.4 | 0.6 to 2.4 |
| Sao Tome and Principe | Both   | 10 to 14 | 2.3 | 1.7 to 3.1 | 138.5 | 64.7 to 213.8  | 1.9 | 0.9 to 2.9 |
| Sao Tome and Principe | Both   | 15 to 19 | 3.5 | 2.5 to 4.8 | 279.9 | 143.0 to 437.3 | 4   | 2.1 to 6.3 |
| Senegal               | Male   | 1 to 4   | 0.5 | 0.3 to 0.8 | 69.9  | 22.3 to 157.4  | 0.8 | 0.3 to 1.9 |
| Senegal               | Male   | 5 to 9   | 1.5 | 0.8 to 2.3 | 35.1  | 15.5 to 68.9   | 0.4 | 0.2 to 0.9 |
| Senegal               | Male   | 10 to 14 | 2.8 | 1.8 to 4.2 | 49.6  | 24.7 to 91.8   | 0.7 | 0.3 to 1.2 |
| Senegal               | Male   | 15 to 19 | 4.3 | 2.5 to 6.4 | 68.6  | 34.5 to 119.6  | 1   | 0.5 to 1.7 |
| Senegal               | Female | 1 to 4   | 0.3 | 0.1 to 0.5 | 58    | 18.5 to 139.9  | 0.7 | 0.2 to 1.7 |
| Senegal               | Female | 5 to 9   | 0.8 | 0.4 to 1.4 | 28.9  | 11.1 to 64.6   | 0.4 | 0.1 to 0.8 |
| Senegal               | Female | 10 to 14 | 1.7 | 1.0 to 2.6 | 45.9  | 21.2 to 98.4   | 0.6 | 0.3 to 1.3 |
| Senegal               | Female | 15 to 19 | 2.7 | 1.5 to 4.2 | 57.3  | 25.2 to 106.5  | 0.8 | 0.4 to 1.5 |
| Senegal               | Both   | 1 to 4   | 0.4 | 0.2 to 0.6 | 64    | 29.6 to 117.6  | 0.8 | 0.4 to 1.4 |
| Senegal               | Both   | 5 to 9   | 1.2 | 0.8 to 1.6 | 32.1  | 17.2 to 55.1   | 0.4 | 0.2 to 0.7 |
| Senegal               | Both   | 10 to 14 | 2.3 | 1.6 to 3.0 | 47.8  | 27.7 to 80.2   | 0.6 | 0.4 to 1.1 |
| Senegal               | Both   | 15 to 19 | 3.5 | 2.4 to 4.7 | 63    | 38.1 to 97.9   | 0.9 | 0.5 to 1.4 |

|              |        |          |     |            |       |               |     |            |
|--------------|--------|----------|-----|------------|-------|---------------|-----|------------|
| Sierra Leone | Male   | 1 to 4   | 0.5 | 0.3 to 0.8 | 242.7 | 81.1 to 534.5 | 2.9 | 1.0 to 6.3 |
| Sierra Leone | Male   | 5 to 9   | 1.5 | 0.8 to 2.3 | 106.7 | 39.7 to 218.7 | 1.3 | 0.5 to 2.8 |
| Sierra Leone | Male   | 10 to 14 | 2.8 | 1.8 to 4.2 | 101.5 | 46.6 to 195.6 | 1.4 | 0.6 to 2.6 |
| Sierra Leone | Male   | 15 to 19 | 4.4 | 2.7 to 6.8 | 150.3 | 69.9 to 259.1 | 2.2 | 1.0 to 3.7 |
| Sierra Leone | Female | 1 to 4   | 0.3 | 0.1 to 0.4 | 144.5 | 48.4 to 356.0 | 1.7 | 0.6 to 4.2 |
| Sierra Leone | Female | 5 to 9   | 0.8 | 0.4 to 1.3 | 68.5  | 26.5 to 143.7 | 0.9 | 0.3 to 1.8 |
| Sierra Leone | Female | 10 to 14 | 1.6 | 0.9 to 2.6 | 67.7  | 29.7 to 137.2 | 0.9 | 0.4 to 1.8 |
| Sierra Leone | Female | 15 to 19 | 2.7 | 1.3 to 4.2 | 105.6 | 53.5 to 198.4 | 1.5 | 0.8 to 2.9 |
| Sierra Leone | Both   | 1 to 4   | 0.4 | 0.2 to 0.5 | 193.8 | 91.9 to 371.0 | 2.3 | 1.1 to 4.4 |
| Sierra Leone | Both   | 5 to 9   | 1.1 | 0.7 to 1.6 | 87.6  | 40.6 to 153.3 | 1.1 | 0.5 to 1.9 |
| Sierra Leone | Both   | 10 to 14 | 2.2 | 1.5 to 3.1 | 84.6  | 46.0 to 143.7 | 1.1 | 0.6 to 1.9 |
| Sierra Leone | Both   | 15 to 19 | 3.5 | 2.4 to 4.9 | 127.9 | 73.6 to 205.3 | 1.8 | 1.1 to 3.0 |
| Togo         | Male   | 1 to 4   | 0.5 | 0.2 to 0.9 | 187.6 | 61.1 to 428.2 | 2.2 | 0.7 to 5.1 |
| Togo         | Male   | 5 to 9   | 1.5 | 0.8 to 2.4 | 75.6  | 32.5 to 150.6 | 1   | 0.4 to 1.9 |
| Togo         | Male   | 10 to 14 | 2.8 | 1.7 to 4.4 | 60.4  | 29.7 to 105.0 | 0.8 | 0.4 to 1.4 |
| Togo         | Male   | 15 to 19 | 4.3 | 2.6 to 6.8 | 79.2  | 40.5 to 133.1 | 1.1 | 0.6 to 1.9 |
| Togo         | Female | 1 to 4   | 0.3 | 0.1 to 0.5 | 118.4 | 33.8 to 331.0 | 1.4 | 0.4 to 3.9 |
| Togo         | Female | 5 to 9   | 0.8 | 0.4 to 1.4 | 35.7  | 14.2 to 72.9  | 0.4 | 0.2 to 0.9 |
| Togo         | Female | 10 to 14 | 1.7 | 1.0 to 2.7 | 33.4  | 14.7 to 67.6  | 0.4 | 0.2 to 0.9 |
| Togo         | Female | 15 to 19 | 2.9 | 1.7 to 4.6 | 61.3  | 30.2 to 117.0 | 0.9 | 0.4 to 1.7 |
| Togo         | Both   | 1 to 4   | 0.4 | 0.2 to 0.6 | 153.2 | 63.4 to 310.1 | 1.8 | 0.7 to 3.7 |
| Togo         | Both   | 5 to 9   | 1.2 | 0.8 to 1.7 | 55.7  | 28.3 to 95.0  | 0.7 | 0.4 to 1.2 |
| Togo         | Both   | 10 to 14 | 2.3 | 1.6 to 3.3 | 46.9  | 28.2 to 73.9  | 0.6 | 0.4 to 1.0 |
| Togo         | Both   | 15 to 19 | 3.6 | 2.5 to 5.1 | 70.3  | 43.3 to 110.5 | 1   | 0.6 to 1.6 |
| South Sudan  | Male   | 1 to 4   | 0.6 | 0.4 to 1.0 | 38    | 10.5 to 95.9  | 0.4 | 0.1 to 1.1 |
| South Sudan  | Male   | 5 to 9   | 1.9 | 1.1 to 2.8 | 29.9  | 11.8 to 64.2  | 0.4 | 0.1 to 0.8 |
| South Sudan  | Male   | 10 to 14 | 3.2 | 2.0 to 4.9 | 49.4  | 21.1 to 115.3 | 0.7 | 0.3 to 1.5 |
| South Sudan  | Male   | 15 to 19 | 4.4 | 2.4 to 7.2 | 118.3 | 66.5 to 194.5 | 1.7 | 1.0 to 2.8 |
| South Sudan  | Female | 1 to 4   | 0.3 | 0.1 to 0.4 | 26.9  | 6.4 to 77.9   | 0.3 | 0.1 to 0.9 |
| South Sudan  | Female | 5 to 9   | 0.8 | 0.5 to 1.3 | 25    | 8.9 to 60.4   | 0.3 | 0.1 to 0.8 |
| South Sudan  | Female | 10 to 14 | 1.7 | 1.0 to 2.6 | 27.2  | 10.6 to 64.6  | 0.4 | 0.1 to 0.9 |
| South Sudan  | Female | 15 to 19 | 2.5 | 1.4 to 4.2 | 51.9  | 25.6 to 93.5  | 0.7 | 0.4 to 1.3 |
| South Sudan  | Both   | 1 to 4   | 0.5 | 0.3 to 0.6 | 32.6  | 11.3 to 69.4  | 0.4 | 0.1 to 0.8 |

|             |        |          |     |            |       |                |     |            |
|-------------|--------|----------|-----|------------|-------|----------------|-----|------------|
| South Sudan | Both   | 5 to 9   | 1.4 | 0.9 to 1.8 | 27.5  | 12.6 to 52.5   | 0.3 | 0.2 to 0.7 |
| South Sudan | Both   | 10 to 14 | 2.4 | 1.7 to 3.4 | 38.4  | 19.4 to 83.8   | 0.5 | 0.3 to 1.1 |
| South Sudan | Both   | 15 to 19 | 3.4 | 2.2 to 5.1 | 85.4  | 53.9 to 130.8  | 1.2 | 0.8 to 1.9 |
| Sudan       | Male   | 1 to 4   | 0.1 | 0.1 to 0.3 | 398.3 | 156.3 to 828.6 | 4.7 | 1.9 to 9.8 |
| Sudan       | Male   | 5 to 9   | 0.4 | 0.2 to 0.8 | 175.8 | 86.6 to 305.2  | 2.2 | 1.1 to 3.8 |
| Sudan       | Male   | 10 to 14 | 0.8 | 0.4 to 1.4 | 174.8 | 96.4 to 283.5  | 2.4 | 1.3 to 3.8 |
| Sudan       | Male   | 15 to 19 | 1.3 | 0.5 to 2.4 | 225.6 | 119.0 to 369.5 | 3.3 | 1.7 to 5.3 |
| Sudan       | Female | 1 to 4   | 0.1 | 0.0 to 0.2 | 413.3 | 109.6 to 838.0 | 4.9 | 1.3 to 9.9 |
| Sudan       | Female | 5 to 9   | 0.3 | 0.1 to 0.6 | 157   | 67.2 to 291.1  | 2   | 0.8 to 3.7 |
| Sudan       | Female | 10 to 14 | 0.6 | 0.2 to 1.2 | 159.1 | 75.5 to 285.9  | 2.1 | 1.0 to 3.8 |
| Sudan       | Female | 15 to 19 | 1   | 0.3 to 1.8 | 175.2 | 89.9 to 302.6  | 2.5 | 1.3 to 4.4 |
| Sudan       | Both   | 1 to 4   | 0.1 | 0.1 to 0.2 | 405.6 | 175.6 to 690.4 | 4.8 | 2.1 to 8.2 |
| Sudan       | Both   | 5 to 9   | 0.4 | 0.2 to 0.6 | 166.5 | 98.3 to 245.9  | 2.1 | 1.2 to 3.1 |
